# Supplementary material for: A Bayesian Inference Based Computational Tool for Parametric and Nonparametric Medical Diagnosis
Source: Diagnostics (Basel). 2023 Oct 5;13(19):3135. doi: 10.3390/diagnostics13193135 (PMC10572594; doi:10.3390/diagnostics13193135)
Supplement: Supplementary file 1 [file diagnostics-13-03135-s001.zip › BayesianDiagnosis.nb]

(* Content-type: application/vnd.wolfram.mathematica *)

(*** Wolfram Notebook File ***)
(* http://www.wolfram.com/nb *)

(* CreatedBy='Mathematica 13.3' *)

(*CacheID: 234*)
(* Internal cache information:
NotebookFileLineBreakTest
NotebookFileLineBreakTest
NotebookDataPosition[       158,          7]
NotebookDataLength[   2800671,      51009]
NotebookOptionsPosition[   2798803,      50964]
NotebookOutlinePosition[   2799434,      50988]
CellTagsIndexPosition[   2799359,      50983]
WindowFrame->Normal*)

(* Beginning of Notebook Content *)
Notebook[{

Cell[CellGroupData[{
Cell[TextData[StyleBox["Bayesian Diagnosis",
 FontSize->36]], "Title",
 Editable->False,
 CellChangeTimes->{{3.779939682019757*^9, 3.7799397638024316`*^9}, {
   3.7865363228492603`*^9, 3.786536325564995*^9}, {3.7871438970939355`*^9, 
   3.7871439406473484`*^9}, {3.8023000419716*^9, 3.8023000641656756`*^9}, {
   3.8043387957771072`*^9, 3.804338807636772*^9}, 3.806637846631281*^9, {
   3.806637885132716*^9, 3.8066379181196594`*^9}, {3.8066379544882393`*^9, 
   3.806637999223695*^9}, 3.8066380980786543`*^9, {3.88935513867235*^9, 
   3.889355175540371*^9}, {3.894501467745408*^9, 3.8945014687281895`*^9}, 
   3.8945129460252132`*^9},ExpressionUUID->"86ff102a-94e1-4d71-af48-\
16d9af6fae40"],

Cell[TextData[StyleBox["A Bayesian Inference Based Computational Tool for \
Parametric and Nonparametric Medical Diagnosis", "Subtitle",
 FontSize->24]], "Title",
 Editable->False,
 CellChangeTimes->{{3.779939682019757*^9, 3.7799397638024316`*^9}, {
   3.7865363228492603`*^9, 3.786536325564995*^9}, {3.7871438970939355`*^9, 
   3.7871439406473484`*^9}, {3.8023000419716*^9, 3.8023000641656756`*^9}, {
   3.8043387957771072`*^9, 3.804338807636772*^9}, 3.806637846631281*^9, {
   3.806637885132716*^9, 3.8066379181196594`*^9}, {3.8066379544882393`*^9, 
   3.806637999223695*^9}, 3.8066381021359987`*^9, {3.889353649763666*^9, 
   3.8893537120907927`*^9}, {3.8893537441798906`*^9, 3.889353751755268*^9}, {
   3.8945014004009104`*^9, 3.894501455194312*^9}, {3.902506558058407*^9, 
   3.902506560070706*^9}, {3.9028823387567205`*^9, 
   3.9028823409044046`*^9}},ExpressionUUID->"7dc427a1-4f47-48d8-b9c5-\
37f82ef00d42"],

Cell[TextData[{
 "Theodora Chatzimichail, MD  \n",
 StyleBox["tc@hcsl.com", "Affiliation"],
 "\nAristides T. Hatjimihail, MD, PhD\n",
 StyleBox[" ath@hcsl.com\n ", "Affiliation"]
}], "Author",
 Editable->False,
 CellChangeTimes->{
  3.779939770766173*^9, {3.7799398045208244`*^9, 3.7799398637488203`*^9}, {
   3.780026882968507*^9, 3.7800269771474247`*^9}, 
   3.7804577481605635`*^9},ExpressionUUID->"bcb5766f-6cc3-4154-ac7b-\
44070d43e69a"],

Cell["\<\
Hellenic Complex Systems Laboratory, Kostis Palamas 21, 66131 Drama, Greece.\
\>", "Affiliation",
 Editable->False,
 CellChangeTimes->{{3.779939871863575*^9, 3.77994000946682*^9}, {
   3.7799400566027045`*^9, 3.7799400570186176`*^9}, 3.780026865496773*^9, 
   3.790605454904579*^9},ExpressionUUID->"6b813d33-fddf-46f5-b195-\
fd5bbf089672"],

Cell[CellGroupData[{

Cell[TextData[StyleBox["Datasets",
 FontSize->10]], "Subsubsubsubsection",
 Editable->False,
 CellChangeTimes->{{3.805073314339836*^9, 3.80507333536786*^9}, {
   3.805073439614975*^9, 3.8050734602420187`*^9}, {3.8066346558494463`*^9, 
   3.8066347247297487`*^9}, {3.806634802358505*^9, 3.8066348105295067`*^9}, {
   3.8066664862909436`*^9, 3.806666502895442*^9}, 3.8070765097138042`*^9, {
   3.8070767128593364`*^9, 3.8070767130363336`*^9}, {3.857308171862177*^9, 
   3.8573081718631754`*^9}, {3.8893553003409805`*^9, 
   3.8893553256636953`*^9}, {3.8945014796489444`*^9, 3.894501480656904*^9}, {
   3.8945024043949556`*^9, 3.894502404400076*^9}, 3.894502523405162*^9, {
   3.8945129324325924`*^9, 3.8945129577291107`*^9}, {3.8945543659519515`*^9, 
   3.8945543691153607`*^9}, {3.901955899113204*^9, 3.9019559738798094`*^9}, {
   3.9025063575289326`*^9, 3.902506369840227*^9}, 3.902531278390168*^9, {
   3.9025313142945366`*^9, 
   3.902531339302072*^9}},ExpressionUUID->"ab2ae93d-2de1-46f7-ba54-\
e3368d58ec4d"],

Cell[BoxData[
 RowBox[{
  RowBox[{"(*", 
   RowBox[{
    RowBox[{
     RowBox[{
      RowBox[{"The", " ", "provided", " ", "datasets"}], ",", " ", 
      RowBox[{"d1", " ", 
       RowBox[{"(", 
        RowBox[{
         RowBox[{"Fasting", " ", "Plasma", " ", "Glucose", " ", 
          RowBox[{"(", 
           RowBox[{"mg", "/", "dl"}], ")"}], " ", "in", " ", "diabetics", " ",
           "40"}], "-", 
         RowBox[{"60", " ", "years", " ", "old"}]}], ")"}]}], ",", " ", 
      RowBox[{"d2", " ", 
       RowBox[{"(", 
        RowBox[{
         RowBox[{"Glucated", " ", "Hemoglobin", " ", "A1c", 
          RowBox[{"(", "%", ")"}], " ", "in", " ", "diabetics", " ", "40"}], 
         "-", 
         RowBox[{"60", " ", "years", " ", "old"}]}], ")"}]}], ",", " ", 
      RowBox[{
       RowBox[{"nd1", " ", 
        RowBox[{"(", 
         RowBox[{
          RowBox[{"Fasting", " ", "Plasma", " ", "Glucose", " ", 
           RowBox[{"(", 
            RowBox[{"mg", "/", "dl"}], ")"}], " ", "in", " ", "nondiabetics", 
           " ", "40"}], "-", 
          RowBox[{"60", " ", "years", " ", "old"}]}], ")"}], " ", "and", " ", 
        "nd2", " ", "Glucated", " ", "Hemoglobin", " ", "A1c", 
        RowBox[{"(", "%", ")"}], " ", "in", " ", "nondiabetics", " ", "40"}], 
       "-", 
       RowBox[{"60", " ", "years", " ", "old"}]}]}], ")"}], ",", " ", 
    RowBox[{
    "were", " ", "obtained", " ", "from", " ", "the", " ", "database", " ", 
     "of", " ", "the", " ", "National", " ", "Health", " ", "and", " ", 
     "Nutrition", " ", "Examination", " ", "Survey", " ", 
     RowBox[{"(", "NHANES", ")"}]}], ",", " ", 
    RowBox[{
    "Centers", " ", "for", " ", "Disease", " ", "Control", " ", "and", " ", 
     "Prevention"}], ",", " ", 
    RowBox[{
     RowBox[{"USA", ".", " ", "They"}], " ", "can", " ", "be", " ", 
     "replaced", " ", "by", " ", "other", " ", "datasets", " ", "of", " ", 
     "two", " ", "mesurands", " ", "in", " ", "diseased", " ", "and", " ", 
     "nondiseased"}]}], "*)"}], " ", "\[IndentingNewLine]", 
  RowBox[{"(*", 
   RowBox[{"d1", ":", " ", 
    RowBox[{"1", "st", " ", "measurand", " ", "in", " ", 
     RowBox[{"diseased", ".", " ", "Current"}], " ", "dataset"}], ":", " ", 
    RowBox[{
     RowBox[{"Fasting", " ", "Plasma", " ", "Glucose", " ", 
      RowBox[{"(", 
       RowBox[{"mg", "/", "dl"}], ")"}], " ", "in", " ", "diabetics", " ", 
      "40"}], "-", 
     RowBox[{"60", " ", "years", " ", "old"}]}]}], "*)"}], "\n", 
  RowBox[{
   RowBox[{
    RowBox[{"d1", "=", 
     RowBox[{"{", 
      RowBox[{
      "121.`", ",", "117.`", ",", "140.`", ",", "161.`", ",", "131.`", ",", 
       "163.`", ",", "200.`", ",", "114.`", ",", "103.`", ",", "249.`", ",", 
       "85.`", ",", "282.`", ",", "104.`", ",", "138.`", ",", "117.`", ",", 
       "123.`", ",", "234.`", ",", "111.`", ",", "128.`", ",", "107.`", ",", 
       "120.`", ",", "96.`", ",", "121.`", ",", "121.`", ",", "141.`", ",", 
       "123.`", ",", "140.`", ",", "106.`", ",", "102.`", ",", "143.`", ",", 
       "94.`", ",", "148.`", ",", "166.`", ",", "121.`", ",", "120.`", ",", 
       "171.`", ",", "124.`", ",", "117.`", ",", "149.`", ",", "122.`", ",", 
       "104.`", ",", "115.`", ",", "147.`", ",", "87.`", ",", "100.`", ",", 
       "118.`", ",", "145.`", ",", "128.`", ",", "181.`", ",", "100.`", ",", 
       "141.`", ",", "95.`", ",", "172.`", ",", "97.`", ",", "117.`", ",", 
       "212.`", ",", "99.`", ",", "92.`", ",", "100.`", ",", "106.`", ",", 
       "104.`", ",", "101.`", ",", "115.`", ",", "120.`", ",", "118.`", ",", 
       "136.`", ",", "114.`", ",", "115.`", ",", "111.`", ",", "124.`", ",", 
       "106.`", ",", "163.`", ",", "104.`", ",", "106.`", ",", "97.`", ",", 
       "108.`", ",", "115.`", ",", "357.`", ",", "108.`", ",", "103.`", ",", 
       "126.`", ",", "180.`", ",", "179.`", ",", "134.`", ",", "198.`", ",", 
       "114.`", ",", "129.`", ",", "83.`", ",", "245.`", ",", "343.`", ",", 
       "124.`", ",", "158.`", ",", "129.`", ",", "118.`", ",", "130.`", ",", 
       "137.`", ",", "112.`", ",", "120.`", ",", "211.`", ",", "102.`", ",", 
       "120.`", ",", "128.`", ",", "258.`", ",", "128.`", ",", "124.`", ",", 
       "104.`", ",", "120.`", ",", "109.`", ",", "137.`", ",", "101.`", ",", 
       "165.`", ",", "128.`", ",", "143.`", ",", "135.`", ",", "143.`", ",", 
       "113.`", ",", "141.`", ",", "335.`", ",", "130.`", ",", "223.`", ",", 
       "132.`", ",", "114.`", ",", "138.`", ",", "118.`", ",", "119.`", ",", 
       "108.`", ",", "96.`", ",", "114.`", ",", "125.`", ",", "136.`", ",", 
       "173.`", ",", "132.`", ",", "144.`", ",", "204.`", ",", "105.`", ",", 
       "146.`", ",", "144.`", ",", "142.`", ",", "293.`", ",", "93.`", ",", 
       "130.`", ",", "132.`", ",", "142.`", ",", "124.`", ",", "117.`", ",", 
       "109.`", ",", "159.`", ",", "118.`", ",", "106.`", ",", "156.`", ",", 
       "102.`", ",", "127.`", ",", "113.`", ",", "120.`", ",", "134.`", ",", 
       "95.`", ",", "116.`", ",", "127.`", ",", "275.`", ",", "150.`", ",", 
       "117.`", ",", "120.`", ",", "105.`", ",", "183.`", ",", "127.`", ",", 
       "117.`", ",", "105.`", ",", "179.`", ",", "220.`", ",", "77.`", ",", 
       "155.`", ",", "127.`", ",", "333.`", ",", "397.`", ",", "134.`", ",", 
       "112.`", ",", "165.`", ",", "105.`", ",", "116.`", ",", "274.`", ",", 
       "155.`", ",", "105.`", ",", "104.`", ",", "111.`", ",", "105.`", ",", 
       "127.`", ",", "146.`", ",", "226.`", ",", "153.`", ",", "355.`", ",", 
       "207.`", ",", "90.`", ",", "116.`", ",", "94.`", ",", "285.`", ",", 
       "245.`", ",", "117.`", ",", "129.`", ",", "173.`", ",", "114.`", ",", 
       "108.`", ",", "127.`", ",", "150.`", ",", "140.`", ",", "131.`", ",", 
       "118.`", ",", "121.`", ",", "112.`", ",", "150.`", ",", "125.`", ",", 
       "158.`"}], "}"}]}], ";"}], "\n", 
   RowBox[{"(*", " ", 
    RowBox[{"d2", ":", " ", 
     RowBox[{"2", "nd", " ", "measurand", " ", "in", " ", 
      RowBox[{"diseased", ".", " ", "Current"}], " ", "dataset"}], ":", " ", 
     RowBox[{
      RowBox[{"Glycated", " ", "Hemoglobin", " ", "A1c", " ", 
       RowBox[{"(", "%", ")"}], " ", "in", " ", "diabetics", " ", "40"}], "-", 
      RowBox[{"60", " ", "years", " ", "old"}]}]}], " ", "*)"}], 
   "\[IndentingNewLine]", 
   RowBox[{
    RowBox[{"d2", "=", 
     RowBox[{"{", 
      RowBox[{
      "6.`", ",", "5.4`", ",", "6.`", ",", "6.7`", ",", "5.5`", ",", "6.2`", 
       ",", "9.6`", ",", "5.7`", ",", "5.4`", ",", "8.9`", ",", "4.8`", ",", 
       "10.6`", ",", "5.4`", ",", "6.5`", ",", "5.`", ",", "5.7`", ",", 
       "9.7`", ",", "5.7`", ",", "6.3`", ",", "5.7`", ",", "6.1`", ",", 
       "5.7`", ",", "6.4`", ",", "6.`", ",", "6.4`", ",", "6.3`", ",", "6.9`",
        ",", "5.7`", ",", "5.`", ",", "6.3`", ",", "5.5`", ",", "6.6`", ",", 
       "6.3`", ",", "5.9`", ",", "6.8`", ",", "6.9`", ",", "6.1`", ",", 
       "5.7`", ",", "7.2`", ",", "6.4`", ",", "5.5`", ",", "5.5`", ",", 
       "6.8`", ",", "5.4`", ",", "5.3`", ",", "6.`", ",", "6.6`", ",", "5.9`",
        ",", "8.9`", ",", "5.5`", ",", "6.6`", ",", "5.6`", ",", "6.4`", ",", 
       "5.5`", ",", "5.5`", ",", "10.2`", ",", "5.5`", ",", "5.7`", ",", 
       "5.5`", ",", "5.4`", ",", "6.1`", ",", "5.8`", ",", "5.9`", ",", 
       "6.1`", ",", "6.5`", ",", "7.7`", ",", "6.5`", ",", "6.2`", ",", "5.`",
        ",", "6.3`", ",", "5.6`", ",", "8.4`", ",", "5.5`", ",", "5.7`", ",", 
       "5.5`", ",", "6.8`", ",", "5.8`", ",", "13.6`", ",", "5.8`", ",", 
       "6.3`", ",", "7.6`", ",", "8.5`", ",", "9.1`", ",", "6.2`", ",", 
       "8.2`", ",", "5.8`", ",", "6.3`", ",", "5.2`", ",", "8.8`", ",", 
       "8.8`", ",", "5.9`", ",", "5.`", ",", "6.1`", ",", "6.`", ",", "5.`", 
       ",", "5.8`", ",", "5.8`", ",", "6.6`", ",", "8.7`", ",", "5.7`", ",", 
       "5.4`", ",", "6.9`", ",", "11.1`", ",", "7.1`", ",", "5.6`", ",", 
       "6.9`", ",", "6.7`", ",", "5.9`", ",", "5.5`", ",", "4.4`", ",", 
       "7.1`", ",", "6.6`", ",", "7.7`", ",", "6.3`", ",", "6.3`", ",", 
       "5.7`", ",", "6.8`", ",", "10.6`", ",", "7.5`", ",", "10.8`", ",", 
       "6.3`", ",", "6.3`", ",", "6.1`", ",", "6.3`", ",", "5.9`", ",", 
       "5.8`", ",", "6.`", ",", "6.5`", ",", "5.9`", ",", "6.2`", ",", "7.6`",
        ",", "6.4`", ",", "7.9`", ",", "9.3`", ",", "6.2`", ",", "6.4`", ",", 
       "6.`", ",", "6.5`", ",", "12.7`", ",", "5.2`", ",", "6.3`", ",", "6.`",
        ",", "5.8`", ",", "7.`", ",", "5.3`", ",", "5.9`", ",", "6.9`", ",", 
       "6.4`", ",", "5.`", ",", "7.`", ",", "5.6`", ",", "6.`", ",", "6.4`", 
       ",", "6.5`", ",", "6.7`", ",", "5.6`", ",", "6.6`", ",", "6.`", ",", 
       "10.9`", ",", "7.6`", ",", "6.2`", ",", "6.`", ",", "5.3`", ",", 
       "7.2`", ",", "6.4`", ",", "5.6`", ",", "6.2`", ",", "7.5`", ",", 
       "8.2`", ",", "5.6`", ",", "6.5`", ",", "6.6`", ",", "12.4`", ",", 
       "13.7`", ",", "6.8`", ",", "6.4`", ",", "6.8`", ",", "5.6`", ",", 
       "6.`", ",", "9.3`", ",", "7.1`", ",", "6.3`", ",", "5.8`", ",", "6.1`",
        ",", "6.4`", ",", "6.7`", ",", "6.6`", ",", "9.2`", ",", "6.8`", ",", 
       "12.3`", ",", "7.7`", ",", "5.3`", ",", "6.2`", ",", "5.1`", ",", 
       "10.2`", ",", "9.2`", ",", "7.`", ",", "6.4`", ",", "6.7`", ",", "6.`",
        ",", "5.9`", ",", "6.1`", ",", "7.4`", ",", "6.3`", ",", "5.9`", ",", 
       "5.5`", ",", "6.1`", ",", "6.6`", ",", "6.5`", ",", "6.1`", ",", 
       "7.1`"}], "}"}]}], ";"}], "\n", 
   RowBox[{"(*", " ", 
    RowBox[{"nd1", ":", " ", 
     RowBox[{"1", "st", " ", "measurand", " ", "in", " ", 
      RowBox[{"nondiseased", ".", " ", "Current"}], " ", "dataset"}], ":", 
     " ", 
     RowBox[{
      RowBox[{"Fasting", " ", "Plasma", " ", "Glucose", " ", 
       RowBox[{"(", 
        RowBox[{"mg", "/", "dl"}], ")"}], "in", " ", "nondiabetics", " ", 
       "40"}], "-", 
      RowBox[{"60", " ", "years", " ", "old"}]}]}], "*)"}], 
   "\[IndentingNewLine]", 
   RowBox[{
    RowBox[{"nd1", "=", 
     RowBox[{"{", 
      RowBox[{
      "90.`", ",", "94.`", ",", "111.`", ",", "126.`", ",", "93.`", ",", 
       "99.`", ",", "93.`", ",", "93.`", ",", "98.`", ",", "100.`", ",", 
       "109.`", ",", "100.`", ",", "101.`", ",", "96.`", ",", "99.`", ",", 
       "100.`", ",", "97.`", ",", "94.`", ",", "93.`", ",", "96.`", ",", 
       "95.`", ",", "115.`", ",", "94.`", ",", "95.`", ",", "98.`", ",", 
       "113.`", ",", "105.`", ",", "116.`", ",", "104.`", ",", "87.`", ",", 
       "120.`", ",", "115.`", ",", "94.`", ",", "103.`", ",", "116.`", ",", 
       "88.`", ",", "91.`", ",", "109.`", ",", "100.`", ",", "98.`", ",", 
       "85.`", ",", "89.`", ",", "98.`", ",", "92.`", ",", "89.`", ",", 
       "89.`", ",", "81.`", ",", "89.`", ",", "106.`", ",", "86.`", ",", 
       "99.`", ",", "111.`", ",", "104.`", ",", "113.`", ",", "99.`", ",", 
       "95.`", ",", "92.`", ",", "102.`", ",", "87.`", ",", "103.`", ",", 
       "107.`", ",", "90.`", ",", "89.`", ",", "98.`", ",", "89.`", ",", 
       "102.`", ",", "100.`", ",", "87.`", ",", "104.`", ",", "114.`", ",", 
       "99.`", ",", "115.`", ",", "109.`", ",", "94.`", ",", "110.`", ",", 
       "78.`", ",", "96.`", ",", "91.`", ",", "103.`", ",", "88.`", ",", 
       "114.`", ",", "105.`", ",", "93.`", ",", "103.`", ",", "117.`", ",", 
       "96.`", ",", "79.`", ",", "103.`", ",", "99.`", ",", "101.`", ",", 
       "97.`", ",", "113.`", ",", "93.`", ",", "120.`", ",", "98.`", ",", 
       "106.`", ",", "89.`", ",", "106.`", ",", "96.`", ",", "91.`", ",", 
       "99.`", ",", "91.`", ",", "97.`", ",", "109.`", ",", "100.`", ",", 
       "100.`", ",", "94.`", ",", "98.`", ",", "102.`", ",", "92.`", ",", 
       "84.`", ",", "102.`", ",", "87.`", ",", "115.`", ",", "95.`", ",", 
       "86.`", ",", "87.`", ",", "85.`", ",", "100.`", ",", "107.`", ",", 
       "93.`", ",", "92.`", ",", "95.`", ",", "87.`", ",", "96.`", ",", 
       "95.`", ",", "105.`", ",", "105.`", ",", "99.`", ",", "105.`", ",", 
       "85.`", ",", "109.`", ",", "99.`", ",", "90.`", ",", "102.`", ",", 
       "103.`", ",", "89.`", ",", "81.`", ",", "95.`", ",", "104.`", ",", 
       "89.`", ",", "85.`", ",", "108.`", ",", "97.`", ",", "106.`", ",", 
       "89.`", ",", "103.`", ",", "100.`", ",", "104.`", ",", "96.`", ",", 
       "90.`", ",", "95.`", ",", "101.`", ",", "82.`", ",", "106.`", ",", 
       "96.`", ",", "83.`", ",", "94.`", ",", "108.`", ",", "104.`", ",", 
       "100.`", ",", "105.`", ",", "100.`", ",", "115.`", ",", "99.`", ",", 
       "98.`", ",", "102.`", ",", "99.`", ",", "90.`", ",", "99.`", ",", 
       "107.`", ",", "93.`", ",", "90.`", ",", "100.`", ",", "98.`", ",", 
       "91.`", ",", "98.`", ",", "123.`", ",", "103.`", ",", "92.`", ",", 
       "105.`", ",", "115.`", ",", "117.`", ",", "88.`", ",", "91.`", ",", 
       "103.`", ",", "91.`", ",", "112.`", ",", "103.`", ",", "103.`", ",", 
       "93.`", ",", "99.`", ",", "85.`", ",", "97.`", ",", "97.`", ",", 
       "91.`", ",", "106.`", ",", "82.`", ",", "93.`", ",", "104.`", ",", 
       "115.`", ",", "81.`", ",", "102.`", ",", "99.`", ",", "95.`", ",", 
       "111.`", ",", "99.`", ",", "112.`", ",", "94.`", ",", "79.`", ",", 
       "97.`", ",", "102.`", ",", "111.`", ",", "118.`", ",", "107.`", ",", 
       "83.`", ",", "104.`", ",", "92.`", ",", "96.`", ",", "114.`", ",", 
       "107.`", ",", "105.`", ",", "97.`", ",", "135.`", ",", "109.`", ",", 
       "102.`", ",", "103.`", ",", "92.`", ",", "109.`", ",", "96.`", ",", 
       "89.`", ",", "88.`", ",", "103.`", ",", "84.`", ",", "130.`", ",", 
       "108.`", ",", "105.`", ",", "117.`", ",", "116.`", ",", "95.`", ",", 
       "85.`", ",", "96.`", ",", "80.`", ",", "104.`", ",", "99.`", ",", 
       "103.`", ",", "101.`", ",", "97.`", ",", "98.`", ",", "97.`", ",", 
       "100.`", ",", "90.`", ",", "82.`", ",", "101.`", ",", "93.`", ",", 
       "105.`", ",", "105.`", ",", "108.`", ",", "103.`", ",", "92.`", ",", 
       "106.`", ",", "100.`", ",", "97.`", ",", "84.`", ",", "125.`", ",", 
       "111.`", ",", "95.`", ",", "103.`", ",", "91.`", ",", "95.`", ",", 
       "99.`", ",", "88.`", ",", "99.`", ",", "100.`", ",", "68.`", ",", 
       "91.`", ",", "107.`", ",", "95.`", ",", "106.`", ",", "106.`", ",", 
       "96.`", ",", "95.`", ",", "97.`", ",", "80.`", ",", "112.`", ",", 
       "107.`", ",", "98.`", ",", "119.`", ",", "89.`", ",", "118.`", ",", 
       "119.`", ",", "125.`", ",", "95.`", ",", "93.`", ",", "91.`", ",", 
       "99.`", ",", "111.`", ",", "103.`", ",", "93.`", ",", "106.`", ",", 
       "86.`", ",", "84.`", ",", "90.`", ",", "102.`", ",", "100.`", ",", 
       "98.`", ",", "97.`", ",", "101.`", ",", "101.`", ",", "99.`", ",", 
       "97.`", ",", "113.`", ",", "106.`", ",", "93.`", ",", "97.`", ",", 
       "100.`", ",", "105.`", ",", "115.`", ",", "92.`", ",", "94.`", ",", 
       "100.`", ",", "102.`", ",", "94.`", ",", "101.`", ",", "107.`", ",", 
       "106.`", ",", "116.`", ",", "97.`", ",", "83.`", ",", "95.`", ",", 
       "98.`", ",", "108.`", ",", "104.`", ",", "95.`", ",", "107.`", ",", 
       "102.`", ",", "95.`", ",", "100.`", ",", "108.`", ",", "93.`", ",", 
       "87.`", ",", "106.`", ",", "83.`", ",", "101.`", ",", "105.`", ",", 
       "94.`", ",", "105.`", ",", "91.`", ",", "93.`", ",", "107.`", ",", 
       "92.`", ",", "109.`", ",", "103.`", ",", "106.`", ",", "105.`", ",", 
       "74.`", ",", "80.`", ",", "90.`", ",", "112.`", ",", "112.`", ",", 
       "107.`", ",", "112.`", ",", "96.`", ",", "101.`", ",", "99.`", ",", 
       "104.`", ",", "110.`", ",", "99.`", ",", "92.`", ",", "104.`", ",", 
       "85.`", ",", "99.`", ",", "102.`", ",", "95.`", ",", "101.`", ",", 
       "87.`", ",", "113.`", ",", "97.`", ",", "91.`", ",", "97.`", ",", 
       "94.`", ",", "91.`", ",", "113.`", ",", "107.`", ",", "97.`", ",", 
       "81.`", ",", "91.`", ",", "82.`", ",", "88.`", ",", "100.`", ",", 
       "98.`", ",", "106.`", ",", "96.`", ",", "78.`", ",", "93.`", ",", 
       "99.`", ",", "90.`", ",", "99.`", ",", "105.`", ",", "98.`", ",", 
       "111.`", ",", "104.`", ",", "124.`", ",", "104.`", ",", "91.`", ",", 
       "100.`", ",", "104.`", ",", "93.`", ",", "97.`", ",", "87.`", ",", 
       "99.`", ",", "95.`", ",", "81.`", ",", "84.`", ",", "95.`", ",", 
       "103.`", ",", "92.`", ",", "93.`", ",", "96.`", ",", "72.`", ",", 
       "103.`", ",", "117.`", ",", "108.`", ",", "97.`", ",", "83.`", ",", 
       "87.`", ",", "94.`", ",", "93.`", ",", "91.`", ",", "99.`", ",", 
       "102.`", ",", "119.`", ",", "88.`", ",", "97.`", ",", "92.`", ",", 
       "108.`", ",", "102.`", ",", "91.`", ",", "93.`", ",", "119.`", ",", 
       "95.`", ",", "103.`", ",", "78.`", ",", "95.`", ",", "114.`", ",", 
       "100.`", ",", "89.`", ",", "88.`", ",", "101.`", ",", "90.`", ",", 
       "98.`", ",", "101.`", ",", "94.`", ",", "95.`", ",", "95.`", ",", 
       "96.`", ",", "109.`", ",", "101.`", ",", "93.`", ",", "100.`", ",", 
       "108.`", ",", "102.`", ",", "82.`", ",", "96.`", ",", "89.`", ",", 
       "103.`", ",", "89.`", ",", "95.`", ",", "105.`", ",", "113.`", ",", 
       "90.`", ",", "97.`", ",", "91.`", ",", "109.`", ",", "94.`", ",", 
       "95.`", ",", "97.`", ",", "97.`", ",", "94.`", ",", "94.`", ",", 
       "95.`", ",", "92.`", ",", "86.`", ",", "102.`", ",", "96.`", ",", 
       "107.`", ",", "88.`", ",", "104.`", ",", "104.`", ",", "89.`", ",", 
       "95.`", ",", "97.`", ",", "105.`", ",", "112.`", ",", "109.`", ",", 
       "97.`", ",", "115.`", ",", "113.`", ",", "99.`", ",", "93.`", ",", 
       "97.`", ",", "94.`", ",", "97.`", ",", "108.`", ",", "91.`", ",", 
       "95.`", ",", "103.`", ",", "97.`", ",", "114.`", ",", "105.`", ",", 
       "106.`", ",", "117.`", ",", "104.`", ",", "90.`", ",", "123.`", ",", 
       "91.`", ",", "87.`", ",", "94.`", ",", "104.`", ",", "123.`", ",", 
       "97.`", ",", "106.`", ",", "95.`", ",", "92.`", ",", "89.`", ",", 
       "101.`", ",", "113.`", ",", "96.`", ",", "99.`", ",", "112.`", ",", 
       "94.`", ",", "115.`", ",", "95.`", ",", "110.`", ",", "102.`", ",", 
       "100.`", ",", "127.`", ",", "90.`", ",", "96.`", ",", "99.`", ",", 
       "95.`", ",", "99.`", ",", "83.`", ",", "86.`", ",", "88.`", ",", 
       "94.`", ",", "91.`", ",", "122.`", ",", "116.`", ",", "89.`", ",", 
       "94.`", ",", "98.`", ",", "93.`", ",", "97.`", ",", "90.`", ",", 
       "103.`", ",", "90.`", ",", "107.`", ",", "96.`", ",", "100.`", ",", 
       "108.`", ",", "101.`", ",", "107.`", ",", "90.`", ",", "112.`", ",", 
       "102.`", ",", "84.`", ",", "84.`", ",", "93.`", ",", "102.`", ",", 
       "101.`", ",", "101.`", ",", "115.`", ",", "120.`", ",", "97.`", ",", 
       "96.`", ",", "112.`", ",", "101.`", ",", "103.`", ",", "97.`", ",", 
       "95.`", ",", "87.`", ",", "83.`", ",", "97.`", ",", "99.`", ",", 
       "98.`", ",", "103.`", ",", "104.`", ",", "102.`", ",", "102.`", ",", 
       "106.`", ",", "120.`", ",", "104.`", ",", "94.`", ",", "96.`", ",", 
       "108.`", ",", "102.`", ",", "97.`", ",", "104.`", ",", "79.`", ",", 
       "102.`", ",", "94.`", ",", "121.`", ",", "99.`", ",", "99.`", ",", 
       "107.`", ",", "111.`", ",", "94.`", ",", "107.`", ",", "116.`", ",", 
       "105.`", ",", "111.`", ",", "93.`", ",", "111.`", ",", "95.`", ",", 
       "103.`", ",", "92.`", ",", "96.`", ",", "108.`", ",", "103.`", ",", 
       "92.`", ",", "113.`", ",", "92.`", ",", "106.`", ",", "116.`", ",", 
       "86.`", ",", "89.`", ",", "109.`", ",", "115.`", ",", "100.`", ",", 
       "100.`", ",", "97.`", ",", "105.`", ",", "99.`", ",", "93.`", ",", 
       "104.`", ",", "116.`", ",", "103.`", ",", "100.`", ",", "100.`", ",", 
       "101.`", ",", "99.`", ",", "98.`", ",", "80.`", ",", "85.`", ",", 
       "100.`", ",", "120.`", ",", "112.`", ",", "110.`", ",", "106.`", ",", 
       "98.`", ",", "126.`", ",", "126.`", ",", "92.`", ",", "86.`", ",", 
       "91.`", ",", "95.`", ",", "89.`", ",", "104.`", ",", "110.`", ",", 
       "88.`", ",", "100.`", ",", "93.`", ",", "109.`", ",", "100.`", ",", 
       "105.`", ",", "111.`", ",", "100.`", ",", "96.`", ",", "118.`", ",", 
       "103.`", ",", "103.`", ",", "93.`", ",", "97.`", ",", "102.`", ",", 
       "96.`", ",", "97.`", ",", "96.`", ",", "97.`", ",", "81.`", ",", 
       "111.`", ",", "85.`", ",", "112.`", ",", "96.`", ",", "97.`", ",", 
       "102.`", ",", "98.`", ",", "103.`", ",", "102.`", ",", "90.`", ",", 
       "96.`", ",", "97.`", ",", "113.`", ",", "85.`", ",", "103.`", ",", 
       "94.`", ",", "111.`", ",", "98.`", ",", "90.`", ",", "103.`", ",", 
       "97.`", ",", "104.`", ",", "103.`", ",", "113.`", ",", "96.`", ",", 
       "88.`", ",", "98.`", ",", "90.`", ",", "104.`", ",", "114.`", ",", 
       "93.`", ",", "103.`", ",", "115.`", ",", "107.`", ",", "103.`", ",", 
       "95.`", ",", "95.`", ",", "88.`", ",", "88.`", ",", "95.`", ",", 
       "89.`", ",", "110.`", ",", "128.`", ",", "90.`", ",", "103.`", ",", 
       "100.`", ",", "112.`", ",", "99.`", ",", "105.`", ",", "95.`", ",", 
       "92.`", ",", "102.`", ",", "104.`", ",", "91.`", ",", "89.`", ",", 
       "99.`", ",", "101.`", ",", "103.`", ",", "92.`", ",", "103.`", ",", 
       "102.`", ",", "95.`", ",", "108.`", ",", "84.`", ",", "102.`", ",", 
       "104.`", ",", "129.`", ",", "99.`", ",", "89.`", ",", "90.`", ",", 
       "96.`", ",", "99.`", ",", "127.`", ",", "95.`", ",", "100.`", ",", 
       "96.`", ",", "95.`", ",", "98.`", ",", "89.`", ",", "97.`", ",", 
       "96.`", ",", "95.`", ",", "98.`", ",", "97.`", ",", "102.`", ",", 
       "83.`", ",", "104.`", ",", "102.`", ",", "89.`", ",", "106.`", ",", 
       "84.`", ",", "103.`", ",", "86.`", ",", "96.`", ",", "119.`", ",", 
       "115.`", ",", "98.`", ",", "94.`", ",", "106.`", ",", "114.`", ",", 
       "87.`", ",", "93.`", ",", "96.`", ",", "90.`", ",", "102.`", ",", 
       "101.`", ",", "84.`", ",", "113.`", ",", "89.`", ",", "112.`", ",", 
       "94.`", ",", "102.`", ",", "102.`", ",", "100.`", ",", "114.`", ",", 
       "86.`", ",", "115.`", ",", "112.`", ",", "101.`", ",", "95.`", ",", 
       "106.`", ",", "116.`", ",", "99.`", ",", "115.`", ",", "105.`", ",", 
       "106.`", ",", "110.`", ",", "105.`", ",", "75.`", ",", "110.`", ",", 
       "87.`", ",", "81.`", ",", "119.`", ",", "128.`", ",", "88.`", ",", 
       "120.`", ",", "124.`", ",", "107.`", ",", "116.`", ",", "104.`", ",", 
       "106.`", ",", "100.`", ",", "99.`", ",", "89.`", ",", "95.`", ",", 
       "107.`", ",", "87.`", ",", "89.`", ",", "110.`", ",", "106.`", ",", 
       "102.`", ",", "122.`", ",", "97.`", ",", "97.`", ",", "93.`", ",", 
       "105.`", ",", "110.`", ",", "96.`", ",", "83.`", ",", "98.`", ",", 
       "115.`", ",", "108.`", ",", "115.`", ",", "96.`", ",", "107.`", ",", 
       "118.`", ",", "116.`", ",", "107.`", ",", "100.`", ",", "96.`", ",", 
       "122.`", ",", "101.`", ",", "101.`", ",", "97.`", ",", "88.`", ",", 
       "104.`", ",", "86.`", ",", "109.`", ",", "95.`", ",", "106.`", ",", 
       "115.`", ",", "90.`", ",", "102.`", ",", "107.`", ",", "111.`", ",", 
       "82.`", ",", "102.`", ",", "99.`", ",", "103.`", ",", "95.`", ",", 
       "111.`", ",", "117.`", ",", "99.`", ",", "81.`", ",", "125.`", ",", 
       "91.`", ",", "93.`", ",", "97.`", ",", "99.`", ",", "105.`", ",", 
       "83.`", ",", "118.`", ",", "88.`", ",", "114.`", ",", "103.`", ",", 
       "110.`", ",", "105.`", ",", "92.`", ",", "92.`", ",", "101.`", ",", 
       "93.`", ",", "102.`", ",", "91.`", ",", "85.`", ",", "112.`", ",", 
       "109.`", ",", "106.`", ",", "102.`", ",", "97.`", ",", "120.`", ",", 
       "118.`", ",", "91.`", ",", "95.`", ",", "112.`", ",", "101.`", ",", 
       "106.`", ",", "98.`", ",", "99.`", ",", "88.`", ",", "106.`", ",", 
       "107.`", ",", "99.`", ",", "111.`", ",", "116.`", ",", "90.`", ",", 
       "91.`", ",", "94.`", ",", "94.`", ",", "105.`", ",", "105.`", ",", 
       "89.`", ",", "98.`", ",", "95.`", ",", "81.`", ",", "90.`", ",", 
       "97.`", ",", "122.`", ",", "113.`", ",", "109.`", ",", "106.`", ",", 
       "130.`", ",", "97.`", ",", "92.`", ",", "108.`", ",", "95.`", ",", 
       "98.`", ",", "101.`", ",", "98.`", ",", "101.`", ",", "112.`", ",", 
       "105.`", ",", "98.`", ",", "108.`", ",", "93.`", ",", "91.`", ",", 
       "103.`", ",", "100.`", ",", "105.`", ",", "102.`", ",", "89.`", ",", 
       "98.`", ",", "91.`", ",", "91.`", ",", "110.`", ",", "94.`", ",", 
       "104.`", ",", "92.`", ",", "90.`", ",", "90.`", ",", "104.`", ",", 
       "97.`", ",", "101.`", ",", "112.`", ",", "108.`", ",", "102.`", ",", 
       "100.`", ",", "119.`", ",", "104.`", ",", "101.`", ",", "87.`", ",", 
       "96.`", ",", "102.`", ",", "104.`", ",", "100.`", ",", "104.`", ",", 
       "112.`", ",", "107.`", ",", "106.`", ",", "84.`", ",", "106.`", ",", 
       "102.`", ",", "94.`", ",", "93.`", ",", "104.`", ",", "99.`", ",", 
       "97.`", ",", "99.`", ",", "101.`", ",", "83.`", ",", "105.`", ",", 
       "99.`", ",", "87.`", ",", "108.`", ",", "90.`", ",", "95.`", ",", 
       "77.`", ",", "102.`", ",", "94.`", ",", "111.`", ",", "99.`", ",", 
       "106.`", ",", "93.`", ",", "109.`", ",", "114.`", ",", "99.`", ",", 
       "109.`", ",", "93.`", ",", "107.`", ",", "92.`", ",", "110.`", ",", 
       "92.`", ",", "108.`", ",", "91.`", ",", "89.`", ",", "102.`", ",", 
       "119.`", ",", "94.`", ",", "88.`", ",", "109.`", ",", "108.`", ",", 
       "106.`", ",", "98.`", ",", "103.`", ",", "99.`", ",", "102.`", ",", 
       "102.`", ",", "99.`", ",", "81.`", ",", "95.`", ",", "105.`", ",", 
       "111.`", ",", "98.`", ",", "99.`", ",", "105.`", ",", "100.`", ",", 
       "99.`", ",", "97.`", ",", "93.`", ",", "104.`", ",", "106.`", ",", 
       "91.`", ",", "112.`", ",", "88.`", ",", "103.`", ",", "92.`", ",", 
       "99.`", ",", "101.`", ",", "88.`", ",", "108.`", ",", "80.`", ",", 
       "95.`", ",", "107.`", ",", "98.`", ",", "101.`", ",", "94.`", ",", 
       "98.`", ",", "105.`", ",", "92.`", ",", "112.`", ",", "108.`", ",", 
       "110.`", ",", "119.`", ",", "101.`", ",", "94.`", ",", "97.`", ",", 
       "101.`", ",", "97.`", ",", "104.`", ",", "100.`", ",", "105.`", ",", 
       "104.`", ",", "113.`", ",", "104.`", ",", "96.`", ",", "119.`", ",", 
       "84.`", ",", "116.`", ",", "99.`", ",", "89.`", ",", "99.`", ",", 
       "96.`", ",", "105.`", ",", "114.`", ",", "104.`", ",", "100.`", ",", 
       "98.`", ",", "108.`", ",", "99.`", ",", "94.`", ",", "83.`", ",", 
       "90.`", ",", "137.`", ",", "102.`", ",", "96.`", ",", "94.`", ",", 
       "106.`", ",", "98.`", ",", "101.`", ",", "125.`", ",", "100.`", ",", 
       "103.`", ",", "92.`", ",", "93.`", ",", "117.`", ",", "97.`", ",", 
       "111.`", ",", "95.`", ",", "114.`", ",", "99.`", ",", "97.`", ",", 
       "93.`", ",", "99.`", ",", "124.`", ",", "110.`", ",", "99.`", ",", 
       "100.`", ",", "98.`", ",", "97.`", ",", "134.`", ",", "95.`", ",", 
       "89.`", ",", "108.`", ",", "100.`", ",", "98.`", ",", "97.`", ",", 
       "93.`", ",", "95.`", ",", "105.`", ",", "90.`", ",", "96.`", ",", 
       "92.`", ",", "90.`", ",", "98.`", ",", "88.`", ",", "92.`", ",", 
       "90.`", ",", "117.`", ",", "75.`", ",", "96.`", ",", "92.`", ",", 
       "90.`", ",", "99.`", ",", "101.`", ",", "96.`", ",", "100.`", ",", 
       "93.`", ",", "86.`", ",", "91.`", ",", "88.`", ",", "99.`", ",", 
       "93.`", ",", "101.`", ",", "94.`", ",", "100.`", ",", "91.`", ",", 
       "104.`", ",", "92.`", ",", "111.`", ",", "97.`", ",", "101.`", ",", 
       "107.`", ",", "86.`", ",", "81.`", ",", "91.`", ",", "103.`", ",", 
       "92.`", ",", "105.`", ",", "108.`", ",", "83.`", ",", "103.`", ",", 
       "126.`", ",", "91.`", ",", "101.`", ",", "97.`", ",", "79.`", ",", 
       "96.`", ",", "115.`", ",", "106.`", ",", "101.`", ",", "106.`", ",", 
       "119.`", ",", "96.`", ",", "94.`", ",", "85.`", ",", "96.`", ",", 
       "113.`", ",", "98.`", ",", "98.`", ",", "108.`", ",", "96.`", ",", 
       "96.`", ",", "109.`", ",", "109.`", ",", "92.`", ",", "101.`", ",", 
       "107.`", ",", "90.`", ",", "89.`", ",", "83.`", ",", "100.`", ",", 
       "120.`", ",", "106.`", ",", "89.`", ",", "111.`", ",", "85.`", ",", 
       "136.`", ",", "99.`", ",", "115.`", ",", "99.`", ",", "97.`", ",", 
       "90.`", ",", "93.`", ",", "99.`", ",", "100.`", ",", "113.`", ",", 
       "98.`", ",", "95.`", ",", "98.`", ",", "87.`", ",", "91.`", ",", 
       "91.`", ",", "95.`", ",", "106.`", ",", "88.`", ",", "108.`", ",", 
       "97.`", ",", "98.`", ",", "110.`", ",", "89.`", ",", "102.`", ",", 
       "94.`", ",", "119.`", ",", "99.`", ",", "92.`", ",", "98.`", ",", 
       "99.`", ",", "101.`", ",", "104.`", ",", "97.`", ",", "94.`", ",", 
       "93.`", ",", "106.`", ",", "94.`", ",", "101.`", ",", "114.`", ",", 
       "98.`", ",", "101.`", ",", "104.`", ",", "85.`", ",", "87.`", ",", 
       "88.`", ",", "94.`", ",", "100.`", ",", "110.`", ",", "90.`", ",", 
       "91.`", ",", "103.`", ",", "111.`", ",", "110.`", ",", "113.`", ",", 
       "107.`", ",", "93.`", ",", "93.`", ",", "120.`", ",", "89.`", ",", 
       "98.`", ",", "97.`", ",", "95.`", ",", "88.`", ",", "94.`", ",", 
       "91.`", ",", "86.`", ",", "109.`", ",", "105.`", ",", "91.`", ",", 
       "103.`", ",", "89.`", ",", "100.`", ",", "103.`", ",", "90.`", ",", 
       "115.`", ",", "102.`", ",", "96.`", ",", "85.`", ",", "99.`", ",", 
       "111.`", ",", "100.`", ",", "105.`", ",", "96.`", ",", "98.`", ",", 
       "96.`", ",", "89.`", ",", "88.`", ",", "93.`", ",", "102.`", ",", 
       "100.`", ",", "99.`", ",", "99.`", ",", "96.`", ",", "89.`", ",", 
       "103.`", ",", "100.`", ",", "82.`", ",", "95.`", ",", "97.`", ",", 
       "97.`", ",", "161.`", ",", "116.`", ",", "99.`", ",", "93.`", ",", 
       "112.`", ",", "97.`", ",", "91.`", ",", "99.`", ",", "94.`", ",", 
       "115.`", ",", "105.`", ",", "93.`", ",", "106.`", ",", "102.`", ",", 
       "100.`", ",", "102.`", ",", "105.`", ",", "111.`", ",", "95.`", ",", 
       "111.`", ",", "92.`", ",", "92.`", ",", "104.`", ",", "96.`", ",", 
       "118.`", ",", "106.`", ",", "83.`", ",", "92.`", ",", "113.`", ",", 
       "87.`", ",", "99.`", ",", "89.`", ",", "104.`", ",", "109.`", ",", 
       "91.`", ",", "89.`", ",", "88.`", ",", "86.`", ",", "94.`", ",", 
       "100.`", ",", "110.`", ",", "101.`", ",", "97.`", ",", "90.`", ",", 
       "100.`", ",", "90.`", ",", "89.`", ",", "113.`", ",", "98.`", ",", 
       "100.`", ",", "105.`", ",", "115.`", ",", "104.`", ",", "99.`", ",", 
       "93.`", ",", "134.`", ",", "105.`", ",", "86.`", ",", "107.`", ",", 
       "92.`", ",", "87.`", ",", "96.`", ",", "105.`", ",", "105.`", ",", 
       "109.`", ",", "90.`", ",", "112.`", ",", "98.`", ",", "112.`", ",", 
       "83.`", ",", "85.`", ",", "108.`", ",", "101.`", ",", "95.`", ",", 
       "99.`", ",", "107.`", ",", "97.`", ",", "101.`", ",", "103.`", ",", 
       "96.`", ",", "94.`", ",", "91.`", ",", "99.`", ",", "90.`", ",", 
       "114.`", ",", "96.`", ",", "102.`", ",", "90.`", ",", "101.`", ",", 
       "100.`", ",", "138.`", ",", "86.`", ",", "111.`", ",", "99.`", ",", 
       "87.`", ",", "100.`", ",", "100.`", ",", "104.`", ",", "100.`", ",", 
       "112.`", ",", "106.`", ",", "92.`", ",", "99.`", ",", "90.`", ",", 
       "99.`", ",", "86.`", ",", "104.`", ",", "98.`", ",", "105.`", ",", 
       "98.`", ",", "78.`", ",", "90.`", ",", "88.`", ",", "107.`", ",", 
       "98.`", ",", "112.`", ",", "122.`", ",", "81.`", ",", "91.`", ",", 
       "88.`", ",", "92.`", ",", "94.`", ",", "107.`", ",", "127.`", ",", 
       "89.`", ",", "110.`", ",", "86.`", ",", "106.`", ",", "83.`", ",", 
       "96.`", ",", "102.`", ",", "77.`", ",", "91.`", ",", "97.`", ",", 
       "99.`", ",", "102.`", ",", "84.`", ",", "89.`", ",", "101.`", ",", 
       "103.`", ",", "93.`", ",", "89.`", ",", "103.`", ",", "99.`", ",", 
       "101.`", ",", "109.`", ",", "110.`", ",", "105.`", ",", "102.`", ",", 
       "108.`", ",", "109.`", ",", "98.`", ",", "96.`", ",", "105.`", ",", 
       "84.`", ",", "100.`", ",", "108.`", ",", "104.`", ",", "88.`", ",", 
       "92.`", ",", "104.`", ",", "102.`", ",", "107.`", ",", "111.`", ",", 
       "85.`", ",", "111.`", ",", "97.`", ",", "96.`", ",", "118.`", ",", 
       "87.`", ",", "81.`", ",", "86.`", ",", "102.`", ",", "91.`", ",", 
       "100.`", ",", "103.`", ",", "91.`", ",", "106.`", ",", "102.`", ",", 
       "107.`", ",", "108.`", ",", "96.`", ",", "96.`", ",", "103.`", ",", 
       "90.`", ",", "101.`", ",", "106.`", ",", "101.`", ",", "95.`", ",", 
       "81.`", ",", "87.`", ",", "94.`", ",", "92.`", ",", "89.`", ",", 
       "100.`", ",", "94.`", ",", "82.`", ",", "94.`", ",", "120.`", ",", 
       "85.`", ",", "89.`", ",", "105.`", ",", "93.`", ",", "134.`", ",", 
       "86.`", ",", "96.`", ",", "100.`", ",", "99.`", ",", "93.`", ",", 
       "103.`", ",", "94.`", ",", "96.`", ",", "105.`", ",", "86.`", ",", 
       "98.`", ",", "96.`", ",", "97.`", ",", "98.`", ",", "97.`", ",", 
       "100.`", ",", "99.`", ",", "90.`", ",", "81.`", ",", "116.`", ",", 
       "88.`", ",", "104.`", ",", "98.`", ",", "110.`", ",", "110.`", ",", 
       "115.`", ",", "94.`", ",", "110.`", ",", "93.`", ",", "91.`", ",", 
       "96.`", ",", "95.`", ",", "87.`", ",", "87.`", ",", "95.`", ",", 
       "118.`", ",", "91.`", ",", "95.`", ",", "94.`", ",", "97.`", ",", 
       "103.`", ",", "103.`", ",", "94.`", ",", "107.`", ",", "98.`", ",", 
       "97.`", ",", "106.`", ",", "84.`", ",", "104.`", ",", "102.`", ",", 
       "92.`", ",", "117.`", ",", "99.`", ",", "112.`", ",", "111.`", ",", 
       "111.`", ",", "104.`", ",", "111.`", ",", "125.`", ",", "92.`", ",", 
       "101.`", ",", "109.`", ",", "108.`", ",", "89.`", ",", "118.`", ",", 
       "121.`", ",", "119.`", ",", "93.`", ",", "102.`", ",", "102.`", ",", 
       "109.`", ",", "89.`", ",", "84.`", ",", "96.`", ",", "95.`", ",", 
       "101.`", ",", "91.`", ",", "90.`", ",", "101.`", ",", "106.`", ",", 
       "106.`", ",", "103.`", ",", "91.`", ",", "90.`", ",", "98.`", ",", 
       "88.`", ",", "103.`", ",", "122.`", ",", "95.`", ",", "76.`", ",", 
       "107.`", ",", "116.`", ",", "103.`", ",", "98.`", ",", "102.`", ",", 
       "94.`", ",", "95.`", ",", "113.`", ",", "107.`", ",", "79.`", ",", 
       "101.`", ",", "107.`", ",", "99.`", ",", "97.`", ",", "106.`", ",", 
       "87.`", ",", "96.`", ",", "111.`", ",", "90.`", ",", "93.`", ",", 
       "118.`", ",", "100.`", ",", "92.`", ",", "92.`", ",", "86.`", ",", 
       "95.`", ",", "91.`", ",", "99.`", ",", "109.`", ",", "107.`", ",", 
       "130.`", ",", "103.`", ",", "105.`", ",", "79.`", ",", "100.`", ",", 
       "109.`", ",", "105.`", ",", "86.`", ",", "95.`", ",", "101.`", ",", 
       "119.`", ",", "105.`", ",", "108.`", ",", "90.`", ",", "95.`", ",", 
       "99.`", ",", "110.`", ",", "82.`", ",", "109.`", ",", "91.`", ",", 
       "105.`", ",", "79.`", ",", "105.`", ",", "83.`", ",", "111.`", ",", 
       "99.`", ",", "105.`", ",", "104.`", ",", "102.`", ",", "105.`", ",", 
       "87.`", ",", "107.`", ",", "101.`", ",", "105.`", ",", "96.`", ",", 
       "99.`", ",", "88.`", ",", "101.`", ",", "99.`", ",", "82.`", ",", 
       "98.`", ",", "90.`", ",", "105.`", ",", "103.`", ",", "114.`", ",", 
       "101.`", ",", "94.`", ",", "138.`", ",", "102.`", ",", "101.`", ",", 
       "83.`", ",", "96.`", ",", "104.`", ",", "105.`", ",", "133.`", ",", 
       "99.`", ",", "102.`", ",", "105.`", ",", "97.`", ",", "105.`", ",", 
       "95.`", ",", "81.`", ",", "94.`", ",", "116.`", ",", "99.`", ",", 
       "106.`", ",", "114.`", ",", "95.`", ",", "100.`", ",", "100.`", ",", 
       "96.`", ",", "98.`", ",", "94.`", ",", "105.`", ",", "78.`", ",", 
       "101.`", ",", "79.`", ",", "91.`", ",", "88.`", ",", "100.`", ",", 
       "102.`", ",", "112.`", ",", "97.`", ",", "93.`", ",", "96.`", ",", 
       "109.`", ",", "100.`", ",", "104.`", ",", "105.`", ",", "97.`", ",", 
       "92.`", ",", "83.`", ",", "95.`", ",", "106.`", ",", "100.`", ",", 
       "97.`", ",", "89.`", ",", "137.`", ",", "107.`", ",", "108.`", ",", 
       "98.`", ",", "106.`", ",", "100.`", ",", "99.`", ",", "110.`", ",", 
       "103.`", ",", "117.`", ",", "103.`", ",", "101.`", ",", "104.`", ",", 
       "92.`", ",", "95.`", ",", "106.`", ",", "105.`", ",", "127.`", ",", 
       "110.`", ",", "105.`", ",", "97.`", ",", "95.`", ",", "88.`", ",", 
       "97.`", ",", "88.`", ",", "98.`", ",", "109.`", ",", "109.`", ",", 
       "100.`", ",", "101.`", ",", "111.`", ",", "92.`", ",", "90.`", ",", 
       "101.`", ",", "93.`", ",", "91.`", ",", "114.`", ",", "109.`", ",", 
       "115.`", ",", "96.`", ",", "116.`", ",", "107.`", ",", "98.`", ",", 
       "98.`", ",", "96.`", ",", "114.`", ",", "89.`", ",", "84.`", ",", 
       "116.`", ",", "99.`", ",", "106.`", ",", "106.`", ",", "81.`", ",", 
       "115.`", ",", "86.`", ",", "100.`", ",", "108.`", ",", "84.`", ",", 
       "97.`", ",", "93.`", ",", "92.`", ",", "92.`", ",", "88.`", ",", 
       "124.`", ",", "93.`", ",", "84.`", ",", "107.`", ",", "91.`", ",", 
       "99.`", ",", "99.`", ",", "99.`", ",", "93.`", ",", "88.`", ",", 
       "84.`", ",", "92.`", ",", "104.`", ",", "97.`", ",", "99.`", ",", 
       "117.`", ",", "91.`", ",", "94.`", ",", "84.`", ",", "105.`", ",", 
       "96.`", ",", "92.`", ",", "100.`", ",", "92.`", ",", "102.`", ",", 
       "140.`", ",", "98.`", ",", "82.`", ",", "103.`", ",", "98.`", ",", 
       "102.`", ",", "93.`", ",", "95.`", ",", "90.`", ",", "110.`", ",", 
       "92.`", ",", "93.`", ",", "95.`", ",", "107.`", ",", "89.`", ",", 
       "102.`", ",", "104.`", ",", "111.`", ",", "105.`", ",", "99.`", ",", 
       "113.`", ",", "88.`", ",", "104.`", ",", "100.`", ",", "97.`", ",", 
       "106.`", ",", "109.`", ",", "97.`", ",", "110.`", ",", "91.`", ",", 
       "96.`", ",", "113.`", ",", "86.`", ",", "100.`", ",", "82.`", ",", 
       "104.`", ",", "95.`", ",", "99.`", ",", "103.`", ",", "89.`", ",", 
       "107.`", ",", "103.`", ",", "107.`", ",", "96.`", ",", "81.`", ",", 
       "99.`", ",", "98.`", ",", "110.`", ",", "106.`", ",", "97.`", ",", 
       "95.`", ",", "85.`", ",", "103.`", ",", "91.`", ",", "100.`", ",", 
       "107.`", ",", "98.`", ",", "97.`", ",", "87.`", ",", "96.`", ",", 
       "98.`", ",", "101.`", ",", "97.`", ",", "109.`", ",", "98.`", ",", 
       "86.`", ",", "102.`", ",", "105.`", ",", "107.`", ",", "99.`", ",", 
       "99.`", ",", "92.`", ",", "112.`", ",", "107.`", ",", "103.`", ",", 
       "88.`", ",", "83.`", ",", "104.`", ",", "90.`", ",", "110.`", ",", 
       "107.`", ",", "107.`", ",", "91.`", ",", "95.`", ",", "96.`", ",", 
       "102.`", ",", "93.`", ",", "96.`", ",", "96.`", ",", "107.`", ",", 
       "96.`", ",", "113.`", ",", "124.`", ",", "105.`", ",", "93.`", ",", 
       "131.`", ",", "116.`", ",", "96.`", ",", "88.`", ",", "86.`", ",", 
       "111.`", ",", "89.`", ",", "101.`", ",", "91.`", ",", "101.`", ",", 
       "90.`", ",", "85.`", ",", "102.`", ",", "111.`", ",", "85.`", ",", 
       "104.`", ",", "89.`", ",", "96.`", ",", "116.`", ",", "94.`", ",", 
       "100.`", ",", "96.`", ",", "104.`", ",", "87.`", ",", "107.`", ",", 
       "103.`", ",", "103.`", ",", "108.`", ",", "97.`", ",", "94.`", ",", 
       "97.`", ",", "90.`", ",", "96.`", ",", "108.`", ",", "92.`", ",", 
       "92.`", ",", "103.`", ",", "87.`", ",", "96.`", ",", "95.`", ",", 
       "91.`", ",", "90.`", ",", "98.`", ",", "149.`", ",", "89.`", ",", 
       "80.`", ",", "84.`", ",", "94.`", ",", "103.`", ",", "105.`", ",", 
       "101.`", ",", "108.`", ",", "103.`", ",", "109.`", ",", "88.`", ",", 
       "100.`", ",", "109.`", ",", "92.`", ",", "101.`", ",", "91.`", ",", 
       "102.`", ",", "96.`", ",", "111.`", ",", "102.`", ",", "86.`", ",", 
       "103.`", ",", "101.`", ",", "91.`", ",", "95.`", ",", "93.`", ",", 
       "86.`", ",", "112.`", ",", "95.`", ",", "110.`", ",", "93.`", ",", 
       "108.`", ",", "93.`", ",", "97.`", ",", "93.`", ",", "96.`", ",", 
       "99.`", ",", "124.`", ",", "90.`", ",", "91.`", ",", "102.`", ",", 
       "108.`", ",", "100.`", ",", "85.`", ",", "114.`", ",", "91.`", ",", 
       "111.`", ",", "86.`", ",", "87.`", ",", "88.`", ",", "103.`", ",", 
       "93.`", ",", "102.`", ",", "110.`", ",", "118.`", ",", "126.`", ",", 
       "90.`", ",", "98.`", ",", "82.`", ",", "89.`", ",", "114.`", ",", 
       "86.`", ",", "97.`", ",", "90.`", ",", "96.`", ",", "94.`", ",", 
       "108.`", ",", "103.`", ",", "93.`", ",", "84.`", ",", "94.`", ",", 
       "94.`", ",", "101.`", ",", "100.`", ",", "98.`", ",", "105.`", ",", 
       "90.`", ",", "84.`", ",", "102.`", ",", "103.`", ",", "97.`", ",", 
       "106.`", ",", "88.`", ",", "93.`", ",", "116.`", ",", "105.`", ",", 
       "111.`", ",", "111.`", ",", "107.`", ",", "92.`", ",", "99.`", ",", 
       "144.`", ",", "90.`", ",", "117.`", ",", "87.`", ",", "89.`", ",", 
       "90.`", ",", "95.`", ",", "75.`", ",", "98.`", ",", "107.`", ",", 
       "91.`", ",", "93.`", ",", "115.`", ",", "89.`", ",", "98.`", ",", 
       "93.`", ",", "119.`", ",", "100.`", ",", "92.`", ",", "99.`", ",", 
       "95.`", ",", "115.`", ",", "86.`", ",", "88.`", ",", "121.`", ",", 
       "93.`", ",", "107.`", ",", "86.`", ",", "87.`", ",", "91.`", ",", 
       "102.`", ",", "102.`", ",", "102.`", ",", "123.`", ",", "114.`", ",", 
       "102.`", ",", "95.`", ",", "99.`", ",", "92.`", ",", "94.`", ",", 
       "131.`", ",", "90.`", ",", "105.`", ",", "78.`", ",", "91.`", ",", 
       "97.`", ",", "90.`", ",", "101.`", ",", "107.`", ",", "103.`", ",", 
       "95.`", ",", "105.`", ",", "109.`", ",", "103.`", ",", "93.`", ",", 
       "106.`", ",", "99.`", ",", "96.`", ",", "95.`", ",", "94.`", ",", 
       "99.`", ",", "89.`", ",", "108.`", ",", "95.`", ",", "96.`", ",", 
       "103.`", ",", "108.`", ",", "119.`", ",", "96.`", ",", "87.`", ",", 
       "86.`", ",", "79.`", ",", "93.`", ",", "95.`", ",", "93.`", ",", 
       "103.`", ",", "92.`", ",", "103.`", ",", "101.`", ",", "73.`", ",", 
       "100.`", ",", "98.`", ",", "88.`", ",", "77.`", ",", "105.`", ",", 
       "98.`", ",", "94.`", ",", "97.`", ",", "99.`", ",", "102.`", ",", 
       "83.`", ",", "95.`", ",", "88.`", ",", "98.`", ",", "97.`", ",", 
       "91.`", ",", "109.`", ",", "114.`", ",", "88.`", ",", "70.`", ",", 
       "99.`", ",", "103.`", ",", "93.`", ",", "93.`", ",", "107.`", ",", 
       "93.`", ",", "91.`", ",", "111.`", ",", "95.`", ",", "100.`", ",", 
       "99.`", ",", "93.`", ",", "85.`", ",", "105.`", ",", "91.`", ",", 
       "109.`", ",", "92.`", ",", "91.`", ",", "103.`", ",", "92.`", ",", 
       "107.`", ",", "91.`", ",", "87.`", ",", "89.`", ",", "111.`", ",", 
       "111.`", ",", "108.`", ",", "89.`", ",", "100.`", ",", "102.`", ",", 
       "98.`", ",", "99.`", ",", "101.`", ",", "91.`", ",", "91.`", ",", 
       "99.`", ",", "113.`", ",", "105.`", ",", "96.`", ",", "90.`", ",", 
       "90.`", ",", "116.`", ",", "81.`", ",", "91.`", ",", "103.`", ",", 
       "90.`", ",", "108.`", ",", "79.`", ",", "85.`", ",", "108.`", ",", 
       "85.`", ",", "108.`", ",", "107.`", ",", "110.`", ",", "115.`", ",", 
       "94.`", ",", "94.`", ",", "103.`", ",", "93.`", ",", "109.`", ",", 
       "103.`", ",", "98.`", ",", "98.`", ",", "105.`", ",", "120.`", ",", 
       "98.`", ",", "94.`", ",", "103.`", ",", "81.`", ",", "96.`", ",", 
       "99.`", ",", "101.`", ",", "117.`", ",", "107.`", ",", "89.`", ",", 
       "113.`", ",", "100.`", ",", "85.`", ",", "92.`", ",", "88.`", ",", 
       "116.`", ",", "95.`", ",", "113.`", ",", "93.`", ",", "103.`", ",", 
       "108.`", ",", "88.`", ",", "100.`", ",", "91.`", ",", "101.`", ",", 
       "108.`", ",", "115.`", ",", "114.`", ",", "93.`", ",", "95.`", ",", 
       "92.`", ",", "113.`", ",", "113.`", ",", "92.`", ",", "93.`", ",", 
       "115.`", ",", "91.`", ",", "110.`", ",", "98.`", ",", "87.`", ",", 
       "87.`", ",", "116.`", ",", "97.`", ",", "100.`", ",", "104.`", ",", 
       "112.`", ",", "103.`", ",", "89.`", ",", "92.`", ",", "115.`", ",", 
       "102.`", ",", "105.`", ",", "99.`", ",", "108.`", ",", "95.`", ",", 
       "105.`", ",", "98.`", ",", "128.`", ",", "77.`", ",", "116.`", ",", 
       "107.`", ",", "93.`", ",", "98.`", ",", "91.`", ",", "100.`", ",", 
       "97.`", ",", "104.`", ",", "103.`", ",", "89.`", ",", "84.`", ",", 
       "135.`", ",", "87.`", ",", "95.`", ",", "99.`", ",", "106.`", ",", 
       "90.`", ",", "114.`", ",", "96.`", ",", "101.`", ",", "104.`", ",", 
       "99.`", ",", "96.`", ",", "95.`", ",", "97.`", ",", "99.`", ",", 
       "98.`", ",", "104.`", ",", "106.`", ",", "91.`", ",", "82.`", ",", 
       "99.`", ",", "101.`", ",", "93.`", ",", "113.`", ",", "83.`", ",", 
       "98.`", ",", "94.`", ",", "99.`", ",", "97.`", ",", "102.`", ",", 
       "108.`", ",", "105.`", ",", "119.`", ",", "98.`", ",", "115.`", ",", 
       "102.`", ",", "106.`", ",", "108.`", ",", "93.`", ",", "98.`", ",", 
       "93.`", ",", "97.`", ",", "104.`", ",", "82.`", ",", "111.`", ",", 
       "104.`", ",", "107.`", ",", "83.`", ",", "100.`", ",", "99.`", ",", 
       "84.`", ",", "90.`", ",", "120.`", ",", "108.`", ",", "82.`", ",", 
       "98.`", ",", "88.`", ",", "96.`", ",", "92.`", ",", "102.`", ",", 
       "104.`", ",", "110.`", ",", "103.`", ",", "109.`", ",", "103.`", ",", 
       "107.`", ",", "124.`", ",", "91.`", ",", "116.`", ",", "89.`", ",", 
       "89.`", ",", "91.`", ",", "75.`", ",", "87.`", ",", "111.`", ",", 
       "112.`", ",", "91.`", ",", "102.`", ",", "86.`", ",", "99.`", ",", 
       "102.`", ",", "106.`", ",", "98.`", ",", "94.`", ",", "94.`", ",", 
       "111.`", ",", "119.`", ",", "108.`", ",", "104.`", ",", "98.`", ",", 
       "87.`", ",", "97.`", ",", "101.`", ",", "92.`", ",", "91.`", ",", 
       "99.`", ",", "100.`", ",", "114.`", ",", "101.`", ",", "105.`", ",", 
       "100.`", ",", "98.`", ",", "93.`", ",", "103.`", ",", "115.`", ",", 
       "102.`", ",", "89.`", ",", "98.`", ",", "99.`", ",", "115.`", ",", 
       "95.`", ",", "105.`", ",", "100.`", ",", "83.`", ",", "102.`", ",", 
       "98.`", ",", "102.`", ",", "81.`", ",", "106.`", ",", "98.`", ",", 
       "93.`", ",", "91.`", ",", "91.`", ",", "94.`", ",", "100.`", ",", 
       "107.`", ",", "108.`", ",", "96.`", ",", "105.`", ",", "92.`", ",", 
       "109.`", ",", "102.`", ",", "105.`", ",", "101.`", ",", "96.`", ",", 
       "97.`", ",", "104.`", ",", "102.`", ",", "88.`", ",", "115.`", ",", 
       "95.`", ",", "95.`", ",", "91.`", ",", "117.`", ",", "86.`", ",", 
       "90.`", ",", "86.`", ",", "106.`", ",", "75.`", ",", "96.`", ",", 
       "87.`", ",", "85.`", ",", "85.`", ",", "93.`", ",", "129.`", ",", 
       "84.`", ",", "112.`", ",", "110.`", ",", "93.`", ",", "107.`", ",", 
       "95.`", ",", "112.`", ",", "96.`", ",", "110.`", ",", "107.`", ",", 
       "90.`", ",", "98.`", ",", "102.`", ",", "96.`", ",", "89.`", ",", 
       "105.`", ",", "105.`", ",", "88.`", ",", "95.`", ",", "96.`", ",", 
       "105.`", ",", "90.`", ",", "94.`", ",", "103.`", ",", "104.`", ",", 
       "83.`", ",", "107.`", ",", "107.`", ",", "103.`", ",", "120.`", ",", 
       "107.`", ",", "99.`", ",", "100.`", ",", "119.`", ",", "101.`", ",", 
       "90.`", ",", "100.`", ",", "111.`", ",", "98.`", ",", "107.`", ",", 
       "109.`", ",", "97.`", ",", "95.`", ",", "90.`", ",", "107.`", ",", 
       "97.`", ",", "106.`", ",", "96.`", ",", "97.`", ",", "111.`", ",", 
       "86.`", ",", "105.`", ",", "92.`", ",", "123.`", ",", "99.`", ",", 
       "101.`", ",", "98.`", ",", "106.`", ",", "96.`", ",", "110.`", ",", 
       "111.`", ",", "81.`", ",", "110.`", ",", "93.`", ",", "97.`", ",", 
       "104.`", ",", "97.`", ",", "92.`", ",", "86.`", ",", "109.`", ",", 
       "94.`", ",", "84.`", ",", "86.`", ",", "81.`", ",", "95.`", ",", 
       "85.`", ",", "87.`", ",", "108.`", ",", "127.`", ",", "98.`", ",", 
       "81.`", ",", "102.`", ",", "100.`", ",", "92.`", ",", "112.`", ",", 
       "109.`", ",", "109.`", ",", "97.`", ",", "103.`", ",", "107.`", ",", 
       "90.`", ",", "92.`", ",", "90.`", ",", "95.`", ",", "103.`", ",", 
       "93.`", ",", "95.`", ",", "75.`", ",", "95.`", ",", "98.`", ",", 
       "114.`", ",", "100.`", ",", "81.`", ",", "95.`", ",", "92.`", ",", 
       "101.`", ",", "91.`", ",", "99.`", ",", "108.`", ",", "98.`", ",", 
       "102.`", ",", "93.`", ",", "95.`", ",", "99.`", ",", "97.`", ",", 
       "96.`", ",", "96.`", ",", "105.`", ",", "101.`", ",", "82.`", ",", 
       "108.`", ",", "91.`", ",", "98.`", ",", "108.`", ",", "113.`", ",", 
       "93.`", ",", "116.`", ",", "85.`", ",", "99.`", ",", "103.`", ",", 
       "110.`", ",", "112.`", ",", "103.`", ",", "93.`", ",", "103.`", ",", 
       "93.`", ",", "102.`", ",", "99.`", ",", "86.`", ",", "99.`", ",", 
       "105.`", ",", "83.`", ",", "84.`", ",", "77.`", ",", "96.`", ",", 
       "101.`", ",", "94.`", ",", "99.`", ",", "107.`", ",", "85.`", ",", 
       "129.`", ",", "99.`", ",", "80.`", ",", "94.`", ",", "107.`", ",", 
       "109.`", ",", "96.`", ",", "131.`", ",", "94.`", ",", "115.`", ",", 
       "109.`", ",", "87.`", ",", "101.`", ",", "131.`", ",", "112.`", ",", 
       "93.`", ",", "98.`", ",", "112.`", ",", "106.`", ",", "100.`", ",", 
       "91.`", ",", "97.`", ",", "84.`", ",", "113.`", ",", "92.`", ",", 
       "102.`", ",", "105.`", ",", "92.`", ",", "105.`", ",", "96.`", ",", 
       "94.`", ",", "97.`", ",", "114.`", ",", "103.`", ",", "94.`", ",", 
       "93.`", ",", "99.`", ",", "90.`", ",", "108.`", ",", "102.`", ",", 
       "100.`", ",", "93.`", ",", "81.`", ",", "119.`", ",", "95.`", ",", 
       "103.`", ",", "98.`", ",", "104.`", ",", "84.`", ",", "91.`", ",", 
       "78.`", ",", "101.`", ",", "89.`", ",", "91.`", ",", "91.`", ",", 
       "128.`", ",", "110.`", ",", "96.`", ",", "92.`", ",", "101.`", ",", 
       "93.`", ",", "90.`", ",", "94.`", ",", "98.`", ",", "101.`", ",", 
       "103.`", ",", "99.`", ",", "107.`", ",", "87.`", ",", "78.`", ",", 
       "93.`", ",", "123.`", ",", "94.`", ",", "94.`", ",", "107.`", ",", 
       "100.`", ",", "95.`", ",", "94.`", ",", "107.`", ",", "94.`", ",", 
       "84.`", ",", "106.`", ",", "104.`", ",", "90.`", ",", "93.`", ",", 
       "103.`", ",", "115.`", ",", "89.`", ",", "97.`", ",", "105.`", ",", 
       "106.`", ",", "95.`", ",", "88.`", ",", "90.`", ",", "101.`", ",", 
       "95.`", ",", "94.`", ",", "102.`", ",", "98.`", ",", "79.`", ",", 
       "103.`", ",", "90.`", ",", "92.`", ",", "89.`", ",", "97.`", ",", 
       "111.`", ",", "87.`", ",", "110.`", ",", "89.`", ",", "95.`", ",", 
       "106.`", ",", "98.`", ",", "98.`", ",", "102.`", ",", "102.`", ",", 
       "105.`", ",", "102.`", ",", "94.`", ",", "108.`", ",", "93.`", ",", 
       "103.`", ",", "104.`", ",", "100.`", ",", "93.`", ",", "99.`", ",", 
       "121.`", ",", "99.`", ",", "96.`", ",", "98.`", ",", "81.`", ",", 
       "83.`", ",", "100.`", ",", "88.`", ",", "100.`", ",", "96.`", ",", 
       "108.`", ",", "93.`", ",", "93.`", ",", "100.`", ",", "107.`", ",", 
       "96.`", ",", "94.`", ",", "103.`", ",", "86.`", ",", "96.`", ",", 
       "84.`", ",", "99.`", ",", "92.`", ",", "110.`", ",", "96.`", ",", 
       "100.`", ",", "98.`", ",", "114.`", ",", "100.`", ",", "128.`", ",", 
       "104.`", ",", "94.`", ",", "97.`", ",", "92.`", ",", "107.`", ",", 
       "90.`", ",", "91.`", ",", "111.`", ",", "133.`", ",", "127.`", ",", 
       "96.`", ",", "94.`", ",", "108.`", ",", "108.`", ",", "107.`", ",", 
       "88.`", ",", "95.`", ",", "105.`", ",", "98.`", ",", "114.`", ",", 
       "93.`", ",", "114.`", ",", "82.`", ",", "93.`", ",", "102.`", ",", 
       "104.`", ",", "92.`", ",", "111.`", ",", "103.`", ",", "89.`", ",", 
       "83.`", ",", "94.`", ",", "93.`", ",", "97.`", ",", "97.`", ",", 
       "109.`", ",", "99.`", ",", "100.`", ",", "95.`", ",", "111.`", ",", 
       "108.`", ",", "87.`", ",", "98.`", ",", "100.`", ",", "114.`", ",", 
       "105.`", ",", "86.`", ",", "112.`", ",", "95.`", ",", "89.`", ",", 
       "109.`", ",", "100.`", ",", "105.`", ",", "118.`", ",", "96.`", ",", 
       "92.`", ",", "99.`", ",", "106.`", ",", "109.`", ",", "97.`", ",", 
       "107.`", ",", "97.`", ",", "118.`", ",", "99.`", ",", "70.`", ",", 
       "107.`", ",", "87.`", ",", "90.`", ",", "104.`", ",", "99.`", ",", 
       "108.`", ",", "118.`", ",", "90.`", ",", "98.`", ",", "99.`", ",", 
       "96.`", ",", "90.`", ",", "96.`", ",", "102.`", ",", "87.`", ",", 
       "68.`", ",", "101.`", ",", "96.`", ",", "94.`", ",", "100.`", ",", 
       "96.`", ",", "104.`", ",", "104.`", ",", "89.`", ",", "85.`", ",", 
       "107.`", ",", "108.`", ",", "95.`", ",", "99.`", ",", "97.`", ",", 
       "105.`", ",", "111.`", ",", "100.`", ",", "115.`", ",", "94.`", ",", 
       "101.`", ",", "80.`", ",", "100.`", ",", "92.`", ",", "93.`", ",", 
       "100.`", ",", "105.`", ",", "97.`", ",", "101.`", ",", "106.`", ",", 
       "100.`", ",", "100.`", ",", "113.`", ",", "92.`", ",", "104.`", ",", 
       "95.`", ",", "101.`", ",", "105.`", ",", "108.`", ",", "84.`", ",", 
       "98.`", ",", "88.`", ",", "92.`", ",", "114.`", ",", "101.`", ",", 
       "101.`", ",", "94.`", ",", "90.`", ",", "100.`", ",", "118.`", ",", 
       "101.`", ",", "83.`", ",", "90.`", ",", "99.`", ",", "96.`", ",", 
       "97.`", ",", "92.`", ",", "101.`", ",", "96.`", ",", "94.`", ",", 
       "93.`", ",", "100.`", ",", "99.`", ",", "99.`", ",", "106.`", ",", 
       "97.`", ",", "99.`", ",", "111.`", ",", "105.`", ",", "120.`", ",", 
       "92.`", ",", "91.`", ",", "93.`", ",", "106.`", ",", "101.`", ",", 
       "106.`", ",", "98.`", ",", "127.`", ",", "101.`", ",", "94.`", ",", 
       "77.`", ",", "82.`", ",", "96.`", ",", "93.`", ",", "90.`", ",", 
       "108.`", ",", "118.`", ",", "97.`", ",", "99.`", ",", "94.`", ",", 
       "104.`", ",", "92.`", ",", "96.`", ",", "94.`", ",", "107.`", ",", 
       "97.`", ",", "87.`", ",", "111.`", ",", "102.`", ",", "101.`", ",", 
       "114.`", ",", "105.`", ",", "99.`", ",", "94.`", ",", "131.`", ",", 
       "94.`", ",", "89.`", ",", "97.`", ",", "93.`", ",", "112.`", ",", 
       "94.`", ",", "109.`", ",", "100.`", ",", "88.`", ",", "107.`", ",", 
       "87.`", ",", "89.`", ",", "110.`", ",", "92.`", ",", "86.`", ",", 
       "99.`", ",", "94.`", ",", "113.`", ",", "101.`", ",", "101.`", ",", 
       "98.`", ",", "103.`", ",", "110.`", ",", "94.`", ",", "97.`", ",", 
       "104.`", ",", "121.`", ",", "92.`", ",", "130.`", ",", "104.`", ",", 
       "102.`", ",", "87.`", ",", "94.`", ",", "92.`", ",", "95.`", ",", 
       "103.`", ",", "95.`", ",", "104.`", ",", "113.`", ",", "101.`", ",", 
       "109.`", ",", "104.`", ",", "87.`", ",", "89.`", ",", "100.`", ",", 
       "93.`", ",", "96.`", ",", "97.`", ",", "121.`", ",", "91.`", ",", 
       "110.`", ",", "98.`", ",", "94.`", ",", "115.`", ",", "98.`", ",", 
       "110.`", ",", "83.`", ",", "98.`", ",", "91.`", ",", "97.`", ",", 
       "94.`", ",", "86.`", ",", "87.`", ",", "98.`", ",", "99.`", ",", 
       "99.`", ",", "120.`", ",", "88.`", ",", "82.`", ",", "113.`", ",", 
       "115.`", ",", "96.`", ",", "94.`", ",", "99.`", ",", "87.`", ",", 
       "92.`", ",", "91.`", ",", "96.`", ",", "94.`", ",", "107.`", ",", 
       "122.`", ",", "96.`", ",", "118.`", ",", "109.`", ",", "95.`", ",", 
       "128.`", ",", "87.`", ",", "137.`", ",", "110.`", ",", "100.`", ",", 
       "108.`", ",", "105.`", ",", "102.`", ",", "90.`", ",", "104.`", ",", 
       "101.`", ",", "94.`", ",", "104.`", ",", "100.`", ",", "103.`", ",", 
       "90.`", ",", "93.`", ",", "100.`", ",", "100.`", ",", "86.`", ",", 
       "98.`", ",", "89.`", ",", "106.`", ",", "90.`", ",", "106.`", ",", 
       "117.`", ",", "108.`", ",", "108.`", ",", "99.`", ",", "105.`", ",", 
       "88.`", ",", "92.`", ",", "83.`", ",", "100.`", ",", "100.`", ",", 
       "103.`", ",", "103.`", ",", "88.`", ",", "93.`", ",", "89.`", ",", 
       "85.`", ",", "101.`", ",", "104.`", ",", "86.`", ",", "97.`", ",", 
       "101.`", ",", "97.`", ",", "101.`", ",", "91.`", ",", "120.`", ",", 
       "94.`", ",", "88.`", ",", "86.`", ",", "86.`", ",", "92.`", ",", 
       "91.`", ",", "98.`", ",", "98.`", ",", "97.`", ",", "97.`", ",", 
       "101.`", ",", "102.`", ",", "128.`", ",", "88.`", ",", "100.`", ",", 
       "108.`", ",", "89.`", ",", "99.`", ",", "106.`", ",", "91.`", ",", 
       "131.`", ",", "102.`", ",", "104.`", ",", "111.`", ",", "99.`", ",", 
       "97.`", ",", "84.`", ",", "98.`", ",", "98.`", ",", "101.`", ",", 
       "138.`", ",", "97.`", ",", "96.`", ",", "96.`", ",", "96.`", ",", 
       "96.`", ",", "98.`", ",", "106.`", ",", "97.`", ",", "90.`", ",", 
       "84.`", ",", "104.`", ",", "126.`", ",", "101.`", ",", "110.`", ",", 
       "95.`", ",", "114.`", ",", "99.`", ",", "109.`", ",", "97.`", ",", 
       "102.`", ",", "104.`", ",", "110.`", ",", "95.`", ",", "109.`", ",", 
       "97.`", ",", "97.`", ",", "115.`", ",", "91.`", ",", "94.`", ",", 
       "96.`", ",", "86.`", ",", "126.`", ",", "94.`", ",", "93.`", ",", 
       "84.`", ",", "109.`", ",", "112.`", ",", "123.`", ",", "94.`", ",", 
       "102.`", ",", "100.`", ",", "103.`", ",", "106.`", ",", "111.`", ",", 
       "105.`", ",", "91.`", ",", "108.`", ",", "96.`", ",", "101.`", ",", 
       "97.`", ",", "103.`", ",", "126.`", ",", "127.`", ",", "102.`", ",", 
       "98.`", ",", "100.`", ",", "102.`", ",", "121.`", ",", "83.`", ",", 
       "95.`", ",", "106.`", ",", "103.`", ",", "97.`", ",", "97.`", ",", 
       "120.`", ",", "107.`", ",", "118.`", ",", "114.`", ",", "106.`", ",", 
       "114.`", ",", "87.`", ",", "100.`", ",", "97.`", ",", "117.`", ",", 
       "115.`", ",", "110.`", ",", "97.`", ",", "106.`", ",", "90.`", ",", 
       "95.`", ",", "94.`", ",", "103.`", ",", "103.`", ",", "107.`", ",", 
       "105.`", ",", "97.`", ",", "109.`", ",", "77.`", ",", "111.`", ",", 
       "98.`", ",", "98.`", ",", "102.`", ",", "90.`", ",", "112.`", ",", 
       "107.`", ",", "92.`", ",", "102.`", ",", "98.`", ",", "95.`", ",", 
       "94.`", ",", "100.`", ",", "102.`", ",", "105.`", ",", "102.`", ",", 
       "135.`", ",", "97.`", ",", "118.`", ",", "117.`", ",", "97.`", ",", 
       "101.`", ",", "89.`", ",", "89.`", ",", "101.`", ",", "115.`", ",", 
       "128.`", ",", "97.`", ",", "102.`", ",", "90.`", ",", "107.`", ",", 
       "99.`", ",", "102.`", ",", "106.`", ",", "104.`", ",", "110.`", ",", 
       "103.`", ",", "111.`", ",", "107.`", ",", "108.`", ",", "91.`", ",", 
       "113.`", ",", "94.`", ",", "112.`", ",", "107.`", ",", "108.`", ",", 
       "108.`", ",", "87.`", ",", "117.`", ",", "112.`", ",", "106.`", ",", 
       "91.`", ",", "122.`", ",", "93.`", ",", "101.`", ",", "107.`", ",", 
       "92.`", ",", "126.`", ",", "113.`", ",", "122.`", ",", "84.`", ",", 
       "89.`", ",", "110.`", ",", "87.`", ",", "93.`", ",", "106.`", ",", 
       "79.`", ",", "101.`", ",", "106.`", ",", "105.`", ",", "64.`", ",", 
       "104.`", ",", "109.`", ",", "116.`", ",", "104.`", ",", "85.`", ",", 
       "111.`", ",", "90.`", ",", "101.`", ",", "100.`", ",", "96.`", ",", 
       "117.`", ",", "99.`", ",", "93.`", ",", "92.`", ",", "98.`", ",", 
       "106.`", ",", "120.`", ",", "127.`", ",", "99.`", ",", "103.`", ",", 
       "96.`", ",", "88.`", ",", "94.`", ",", "112.`", ",", "100.`", ",", 
       "94.`", ",", "114.`", ",", "119.`", ",", "121.`", ",", "95.`", ",", 
       "124.`", ",", "104.`", ",", "97.`", ",", "101.`", ",", "106.`", ",", 
       "106.`", ",", "96.`", ",", "94.`", ",", "111.`", ",", "103.`", ",", 
       "102.`", ",", "95.`", ",", "104.`", ",", "95.`", ",", "95.`", ",", 
       "103.`", ",", "107.`", ",", "112.`", ",", "110.`", ",", "108.`", ",", 
       "107.`", ",", "98.`", ",", "104.`", ",", "99.`", ",", "106.`", ",", 
       "91.`", ",", "102.`", ",", "91.`", ",", "106.`", ",", "106.`", ",", 
       "100.`", ",", "104.`", ",", "110.`", ",", "101.`", ",", "94.`", ",", 
       "102.`", ",", "97.`", ",", "100.`", ",", "115.`", ",", "105.`", ",", 
       "117.`", ",", "98.`", ",", "94.`", ",", "81.`", ",", "112.`", ",", 
       "99.`", ",", "100.`", ",", "115.`", ",", "111.`", ",", "91.`", ",", 
       "110.`", ",", "107.`", ",", "104.`", ",", "128.`", ",", "87.`", ",", 
       "96.`", ",", "96.`", ",", "95.`", ",", "118.`", ",", "112.`", ",", 
       "89.`", ",", "119.`", ",", "97.`", ",", "89.`", ",", "102.`", ",", 
       "97.`", ",", "109.`", ",", "100.`", ",", "96.`", ",", "94.`", ",", 
       "101.`", ",", "88.`", ",", "105.`", ",", "117.`", ",", "101.`", ",", 
       "92.`", ",", "100.`", ",", "92.`", ",", "118.`", ",", "94.`", ",", 
       "94.`", ",", "91.`", ",", "95.`", ",", "98.`", ",", "93.`", ",", 
       "96.`", ",", "108.`", ",", "93.`", ",", "92.`", ",", "93.`", ",", 
       "94.`", ",", "106.`", ",", "100.`", ",", "105.`", ",", "120.`", ",", 
       "105.`", ",", "93.`", ",", "104.`", ",", "95.`", ",", "108.`", ",", 
       "89.`", ",", "102.`", ",", "99.`", ",", "118.`", ",", "132.`", ",", 
       "98.`", ",", "112.`", ",", "98.`", ",", "97.`", ",", "98.`", ",", 
       "113.`", ",", "86.`", ",", "113.`", ",", "92.`", ",", "96.`", ",", 
       "122.`", ",", "96.`", ",", "88.`", ",", "114.`", ",", "139.`", ",", 
       "134.`", ",", "86.`", ",", "113.`", ",", "95.`", ",", "102.`", ",", 
       "97.`", ",", "121.`", ",", "110.`", ",", "95.`", ",", "107.`", ",", 
       "122.`", ",", "98.`", ",", "98.`", ",", "115.`", ",", "105.`", ",", 
       "99.`", ",", "118.`", ",", "118.`", ",", "93.`", ",", "107.`", ",", 
       "104.`", ",", "101.`", ",", "103.`", ",", "96.`", ",", "98.`", ",", 
       "105.`", ",", "99.`", ",", "99.`", ",", "125.`", ",", "100.`", ",", 
       "119.`", ",", "121.`", ",", "78.`", ",", "131.`", ",", "94.`", ",", 
       "97.`", ",", "96.`", ",", "96.`", ",", "86.`", ",", "103.`", ",", 
       "115.`", ",", "113.`", ",", "97.`", ",", "99.`", ",", "91.`", ",", 
       "110.`", ",", "96.`", ",", "105.`", ",", "100.`", ",", "100.`", ",", 
       "98.`", ",", "107.`", ",", "110.`", ",", "111.`", ",", "83.`", ",", 
       "111.`", ",", "101.`", ",", "106.`", ",", "97.`", ",", "96.`", ",", 
       "114.`", ",", "102.`", ",", "100.`", ",", "107.`", ",", "81.`", ",", 
       "113.`", ",", "132.`", ",", "111.`", ",", "102.`", ",", "103.`", ",", 
       "89.`", ",", "115.`", ",", "110.`", ",", "93.`", ",", "92.`", ",", 
       "105.`", ",", "92.`", ",", "129.`", ",", "99.`", ",", "90.`", ",", 
       "97.`", ",", "96.`", ",", "105.`", ",", "97.`", ",", "103.`", ",", 
       "122.`", ",", "86.`", ",", "101.`", ",", "100.`", ",", "100.`", ",", 
       "79.`", ",", "117.`", ",", "103.`", ",", "103.`", ",", "99.`", ",", 
       "96.`", ",", "111.`", ",", "99.`", ",", "113.`", ",", "106.`", ",", 
       "113.`", ",", "97.`", ",", "102.`", ",", "113.`", ",", "106.`", ",", 
       "102.`", ",", "119.`", ",", "109.`", ",", "90.`", ",", "83.`", ",", 
       "126.`", ",", "94.`", ",", "103.`", ",", "116.`", ",", "96.`", ",", 
       "103.`", ",", "101.`", ",", "111.`", ",", "99.`", ",", "88.`", ",", 
       "113.`", ",", "106.`", ",", "85.`", ",", "99.`", ",", "103.`", ",", 
       "94.`", ",", "96.`", ",", "99.`", ",", "102.`", ",", "96.`", ",", 
       "98.`", ",", "111.`", ",", "82.`", ",", "104.`", ",", "102.`", ",", 
       "116.`", ",", "104.`", ",", "96.`", ",", "105.`", ",", "106.`", ",", 
       "106.`", ",", "90.`", ",", "87.`", ",", "94.`", ",", "98.`", ",", 
       "95.`", ",", "106.`", ",", "104.`", ",", "110.`", ",", "105.`", ",", 
       "113.`", ",", "122.`", ",", "100.`", ",", "87.`", ",", "97.`", ",", 
       "117.`", ",", "112.`", ",", "95.`", ",", "89.`", ",", "128.`", ",", 
       "97.`", ",", "108.`", ",", "97.`", ",", "97.`", ",", "90.`", ",", 
       "94.`", ",", "115.`", ",", "95.`", ",", "96.`", ",", "111.`", ",", 
       "91.`", ",", "121.`", ",", "81.`", ",", "101.`", ",", "113.`", ",", 
       "107.`", ",", "112.`", ",", "101.`", ",", "110.`", ",", "91.`", ",", 
       "112.`", ",", "96.`", ",", "104.`", ",", "120.`", ",", "95.`", ",", 
       "114.`", ",", "94.`", ",", "93.`", ",", "119.`", ",", "89.`", ",", 
       "116.`", ",", "108.`", ",", "97.`", ",", "91.`", ",", "104.`", ",", 
       "110.`", ",", "107.`", ",", "98.`", ",", "99.`", ",", "105.`", ",", 
       "94.`", ",", "87.`", ",", "84.`", ",", "92.`", ",", "88.`", ",", 
       "103.`", ",", "115.`", ",", "107.`", ",", "93.`", ",", "92.`", ",", 
       "107.`", ",", "101.`", ",", "96.`", ",", "101.`", ",", "101.`", ",", 
       "99.`", ",", "104.`", ",", "95.`", ",", "99.`", ",", "96.`", ",", 
       "100.`", ",", "88.`", ",", "98.`", ",", "98.`", ",", "84.`", ",", 
       "101.`", ",", "94.`", ",", "96.`", ",", "97.`", ",", "102.`", ",", 
       "117.`", ",", "110.`", ",", "101.`", ",", "104.`", ",", "115.`", ",", 
       "95.`", ",", "101.`", ",", "104.`", ",", "113.`", ",", "101.`", ",", 
       "98.`", ",", "74.`", ",", "98.`"}], "}"}]}], ";"}], "\n", 
   RowBox[{"(*", " ", 
    RowBox[{"nd2", ":", " ", 
     RowBox[{"2", "nd", " ", "measurand", " ", "in", " ", 
      RowBox[{"nondiseased", ".", " ", "Current"}], " ", "dataset"}], ":", 
     " ", 
     RowBox[{
      RowBox[{"Glycated", " ", "Hemoglobin", " ", "A1c", " ", 
       RowBox[{"(", "%", ")"}], " ", "in", " ", "nondiabetics", " ", "40"}], 
      "-", 
      RowBox[{"60", " ", "years", " ", "old"}]}]}], "*)"}], 
   "\[IndentingNewLine]", 
   RowBox[{
    RowBox[{"nd2", "=", 
     RowBox[{"{", 
      RowBox[{
      "6.`", ",", "4.6`", ",", "5.2`", ",", "6.`", ",", "5.6`", ",", "5.1`", 
       ",", "5.4`", ",", "4.3`", ",", "5.9`", ",", "6.`", ",", "5.7`", ",", 
       "5.5`", ",", "4.9`", ",", "5.6`", ",", "5.4`", ",", "5.3`", ",", 
       "5.8`", ",", "5.7`", ",", "4.8`", ",", "5.2`", ",", "5.3`", ",", "6.`",
        ",", "5.3`", ",", "5.6`", ",", "5.4`", ",", "5.5`", ",", "6.3`", ",", 
       "5.`", ",", "5.2`", ",", "5.5`", ",", "5.4`", ",", "5.3`", ",", "4.7`",
        ",", "4.7`", ",", "5.4`", ",", "5.5`", ",", "5.4`", ",", "5.3`", ",", 
       "5.4`", ",", "5.9`", ",", "4.6`", ",", "5.4`", ",", "5.7`", ",", 
       "5.4`", ",", "4.2`", ",", "5.5`", ",", "5.2`", ",", "5.`", ",", "5.`", 
       ",", "5.4`", ",", "5.3`", ",", "5.2`", ",", "6.`", ",", "5.9`", ",", 
       "5.9`", ",", "5.3`", ",", "5.6`", ",", "5.7`", ",", "5.1`", ",", 
       "5.5`", ",", "4.9`", ",", "5.3`", ",", "5.6`", ",", "5.2`", ",", 
       "5.1`", ",", "5.1`", ",", "5.3`", ",", "5.`", ",", "5.`", ",", "5.6`", 
       ",", "4.9`", ",", "5.5`", ",", "5.7`", ",", "5.1`", ",", "5.3`", ",", 
       "5.3`", ",", "5.4`", ",", "5.1`", ",", "5.6`", ",", "5.2`", ",", "5.`",
        ",", "5.`", ",", "5.5`", ",", "5.6`", ",", "5.4`", ",", "5.1`", ",", 
       "5.5`", ",", "5.8`", ",", "5.8`", ",", "5.`", ",", "4.7`", ",", "5.5`",
        ",", "5.6`", ",", "5.1`", ",", "5.5`", ",", "5.8`", ",", "5.3`", ",", 
       "5.5`", ",", "6.6`", ",", "5.`", ",", "4.9`", ",", "5.4`", ",", "5.4`",
        ",", "5.9`", ",", "5.3`", ",", "6.2`", ",", "5.`", ",", "5.`", ",", 
       "5.5`", ",", "5.2`", ",", "4.8`", ",", "6.4`", ",", "5.2`", ",", 
       "5.2`", ",", "5.4`", ",", "5.1`", ",", "4.9`", ",", "5.1`", ",", 
       "5.9`", ",", "5.2`", ",", "5.`", ",", "5.`", ",", "5.3`", ",", "4.6`", 
       ",", "5.`", ",", "4.6`", ",", "5.5`", ",", "5.3`", ",", "5.9`", ",", 
       "5.6`", ",", "5.7`", ",", "5.1`", ",", "5.1`", ",", "5.2`", ",", 
       "5.2`", ",", "5.8`", ",", "5.`", ",", "5.5`", ",", "5.4`", ",", "4.7`",
        ",", "5.2`", ",", "5.5`", ",", "4.9`", ",", "5.4`", ",", "4.8`", ",", 
       "5.1`", ",", "5.7`", ",", "4.9`", ",", "5.1`", ",", "5.3`", ",", 
       "6.2`", ",", "5.4`", ",", "5.1`", ",", "5.7`", ",", "5.4`", ",", "5.`",
        ",", "5.5`", ",", "4.9`", ",", "6.`", ",", "5.7`", ",", "5.7`", ",", 
       "5.`", ",", "5.4`", ",", "6.3`", ",", "5.`", ",", "5.4`", ",", "4.9`", 
       ",", "4.6`", ",", "6.`", ",", "5.8`", ",", "5.5`", ",", "5.3`", ",", 
       "5.1`", ",", "5.4`", ",", "5.2`", ",", "5.5`", ",", "5.5`", ",", 
       "5.3`", ",", "5.7`", ",", "4.9`", ",", "5.1`", ",", "5.8`", ",", 
       "5.7`", ",", "5.1`", ",", "5.5`", ",", "5.6`", ",", "5.3`", ",", 
       "6.1`", ",", "5.`", ",", "5.6`", ",", "5.`", ",", "5.4`", ",", "4.5`", 
       ",", "5.4`", ",", "4.2`", ",", "5.`", ",", "5.8`", ",", "5.2`", ",", 
       "5.`", ",", "4.9`", ",", "4.3`", ",", "5.4`", ",", "5.7`", ",", "5.6`",
        ",", "5.4`", ",", "5.2`", ",", "4.4`", ",", "6.1`", ",", "5.2`", ",", 
       "4.7`", ",", "5.3`", ",", "5.7`", ",", "6.1`", ",", "5.6`", ",", 
       "5.6`", ",", "5.2`", ",", "4.9`", ",", "5.2`", ",", "5.3`", ",", 
       "6.4`", ",", "6.1`", ",", "5.2`", ",", "5.1`", ",", "4.4`", ",", 
       "6.2`", ",", "5.8`", ",", "5.6`", ",", "5.6`", ",", "6.2`", ",", 
       "5.6`", ",", "5.5`", ",", "5.`", ",", "5.7`", ",", "5.2`", ",", "5.9`",
        ",", "5.7`", ",", "5.5`", ",", "5.2`", ",", "4.1`", ",", "5.`", ",", 
       "5.3`", ",", "5.2`", ",", "4.9`", ",", "5.4`", ",", "5.1`", ",", 
       "4.9`", ",", "4.9`", ",", "5.4`", ",", "5.1`", ",", "5.5`", ",", 
       "5.9`", ",", "5.3`", ",", "4.7`", ",", "5.5`", ",", "5.3`", ",", 
       "5.7`", ",", "5.3`", ",", "5.2`", ",", "5.6`", ",", "5.3`", ",", 
       "5.1`", ",", "5.9`", ",", "5.5`", ",", "4.7`", ",", "6.5`", ",", 
       "5.9`", ",", "5.6`", ",", "5.5`", ",", "5.6`", ",", "5.7`", ",", 
       "5.3`", ",", "5.2`", ",", "5.4`", ",", "5.5`", ",", "4.9`", ",", 
       "5.3`", ",", "5.4`", ",", "5.1`", ",", "5.7`", ",", "5.4`", ",", 
       "5.3`", ",", "5.6`", ",", "5.1`", ",", "5.3`", ",", "5.7`", ",", 
       "5.7`", ",", "5.3`", ",", "6.3`", ",", "4.4`", ",", "5.7`", ",", 
       "5.1`", ",", "5.1`", ",", "5.3`", ",", "5.9`", ",", "5.2`", ",", 
       "6.2`", ",", "4.8`", ",", "6.3`", ",", "5.4`", ",", "5.4`", ",", 
       "4.9`", ",", "5.1`", ",", "5.`", ",", "5.2`", ",", "5.`", ",", "5.5`", 
       ",", "5.9`", ",", "5.5`", ",", "4.9`", ",", "5.5`", ",", "5.1`", ",", 
       "5.5`", ",", "5.3`", ",", "5.3`", ",", "5.5`", ",", "5.3`", ",", 
       "5.8`", ",", "5.3`", ",", "5.2`", ",", "5.3`", ",", "5.6`", ",", 
       "5.6`", ",", "5.1`", ",", "5.4`", ",", "5.8`", ",", "5.4`", ",", 
       "5.5`", ",", "5.1`", ",", "5.6`", ",", "5.3`", ",", "5.5`", ",", 
       "5.8`", ",", "5.4`", ",", "5.3`", ",", "4.7`", ",", "5.5`", ",", 
       "5.4`", ",", "5.8`", ",", "5.2`", ",", "5.5`", ",", "5.1`", ",", 
       "5.7`", ",", "5.3`", ",", "5.2`", ",", "5.3`", ",", "5.3`", ",", 
       "5.7`", ",", "5.`", ",", "5.7`", ",", "4.9`", ",", "5.2`", ",", "6.`", 
       ",", "5.4`", ",", "5.5`", ",", "5.7`", ",", "5.2`", ",", "5.1`", ",", 
       "5.4`", ",", "5.8`", ",", "5.1`", ",", "5.3`", ",", "5.2`", ",", 
       "5.4`", ",", "5.5`", ",", "5.7`", ",", "5.5`", ",", "5.`", ",", "5.3`",
        ",", "5.1`", ",", "5.6`", ",", "4.8`", ",", "5.8`", ",", "5.`", ",", 
       "5.6`", ",", "5.2`", ",", "5.`", ",", "5.3`", ",", "5.`", ",", "5.8`", 
       ",", "5.2`", ",", "5.8`", ",", "5.2`", ",", "5.7`", ",", "5.5`", ",", 
       "5.9`", ",", "4.8`", ",", "5.5`", ",", "5.6`", ",", "5.1`", ",", 
       "4.7`", ",", "5.1`", ",", "5.2`", ",", "5.4`", ",", "4.5`", ",", 
       "4.9`", ",", "5.2`", ",", "5.3`", ",", "4.7`", ",", "4.7`", ",", 
       "5.6`", ",", "6.`", ",", "5.7`", ",", "5.4`", ",", "4.9`", ",", "5.6`",
        ",", "6.`", ",", "5.7`", ",", "5.4`", ",", "5.5`", ",", "5.1`", ",", 
       "5.`", ",", "5.1`", ",", "4.8`", ",", "5.3`", ",", "5.1`", ",", "4.4`",
        ",", "5.`", ",", "4.8`", ",", "4.7`", ",", "5.`", ",", "5.2`", ",", 
       "6.`", ",", "5.6`", ",", "5.4`", ",", "4.7`", ",", "4.6`", ",", "5.4`",
        ",", "5.6`", ",", "4.8`", ",", "5.3`", ",", "5.5`", ",", "5.7`", ",", 
       "5.5`", ",", "5.7`", ",", "4.9`", ",", "5.4`", ",", "5.9`", ",", 
       "5.2`", ",", "4.6`", ",", "5.8`", ",", "5.5`", ",", "5.4`", ",", 
       "4.8`", ",", "5.`", ",", "6.1`", ",", "5.5`", ",", "5.9`", ",", "5.3`",
        ",", "5.4`", ",", "5.4`", ",", "5.7`", ",", "6.5`", ",", "5.6`", ",", 
       "5.4`", ",", "4.9`", ",", "5.5`", ",", "5.6`", ",", "5.`", ",", "5.2`",
        ",", "4.8`", ",", "4.8`", ",", "5.1`", ",", "5.1`", ",", "5.9`", ",", 
       "5.4`", ",", "5.8`", ",", "5.1`", ",", "5.1`", ",", "4.9`", ",", 
       "5.6`", ",", "5.2`", ",", "4.9`", ",", "4.9`", ",", "5.1`", ",", 
       "5.4`", ",", "5.6`", ",", "5.6`", ",", "5.4`", ",", "5.2`", ",", 
       "4.7`", ",", "5.2`", ",", "5.6`", ",", "5.1`", ",", "5.3`", ",", 
       "5.7`", ",", "5.6`", ",", "5.3`", ",", "4.8`", ",", "6.`", ",", "5.3`",
        ",", "5.3`", ",", "4.9`", ",", "5.8`", ",", "5.4`", ",", "6.`", ",", 
       "5.1`", ",", "5.7`", ",", "5.7`", ",", "5.4`", ",", "5.9`", ",", 
       "5.2`", ",", "4.7`", ",", "5.2`", ",", "5.5`", ",", "4.1`", ",", 
       "5.3`", ",", "5.`", ",", "5.7`", ",", "6.`", ",", "5.8`", ",", "5.5`", 
       ",", "4.6`", ",", "5.4`", ",", "5.6`", ",", "5.9`", ",", "5.6`", ",", 
       "5.6`", ",", "5.6`", ",", "5.7`", ",", "5.7`", ",", "5.7`", ",", 
       "5.7`", ",", "5.5`", ",", "4.9`", ",", "5.3`", ",", "5.5`", ",", 
       "5.5`", ",", "5.9`", ",", "5.7`", ",", "5.3`", ",", "5.1`", ",", 
       "6.2`", ",", "5.5`", ",", "5.7`", ",", "5.6`", ",", "5.3`", ",", 
       "4.8`", ",", "6.1`", ",", "5.5`", ",", "5.4`", ",", "5.8`", ",", 
       "5.4`", ",", "5.8`", ",", "5.9`", ",", "5.2`", ",", "5.7`", ",", "5.`",
        ",", "5.8`", ",", "5.7`", ",", "6.2`", ",", "5.3`", ",", "5.3`", ",", 
       "5.6`", ",", "5.4`", ",", "5.1`", ",", "6.`", ",", "5.3`", ",", "5.7`",
        ",", "4.8`", ",", "5.4`", ",", "5.8`", ",", "5.4`", ",", "5.8`", ",", 
       "5.5`", ",", "5.7`", ",", "4.6`", ",", "4.7`", ",", "5.5`", ",", 
       "5.1`", ",", "5.7`", ",", "5.5`", ",", "5.5`", ",", "5.5`", ",", 
       "5.8`", ",", "5.5`", ",", "5.`", ",", "5.4`", ",", "6.2`", ",", "5.`", 
       ",", "5.2`", ",", "5.7`", ",", "5.2`", ",", "5.1`", ",", "5.3`", ",", 
       "5.3`", ",", "5.9`", ",", "5.5`", ",", "5.4`", ",", "5.8`", ",", 
       "5.4`", ",", "6.`", ",", "5.7`", ",", "5.6`", ",", "5.3`", ",", "5.5`",
        ",", "5.2`", ",", "5.9`", ",", "5.6`", ",", "5.7`", ",", "5.2`", ",", 
       "5.4`", ",", "5.`", ",", "6.2`", ",", "5.3`", ",", "5.2`", ",", "4.8`",
        ",", "5.4`", ",", "5.4`", ",", "5.6`", ",", "6.6`", ",", "5.4`", ",", 
       "6.4`", ",", "5.9`", ",", "5.7`", ",", "4.9`", ",", "5.4`", ",", 
       "5.4`", ",", "5.6`", ",", "5.9`", ",", "5.9`", ",", "5.8`", ",", 
       "5.4`", ",", "5.2`", ",", "6.4`", ",", "5.9`", ",", "6.`", ",", "5.2`",
        ",", "6.1`", ",", "5.5`", ",", "5.5`", ",", "5.3`", ",", "5.2`", ",", 
       "4.9`", ",", "5.7`", ",", "5.5`", ",", "4.9`", ",", "6.2`", ",", 
       "5.5`", ",", "5.4`", ",", "5.6`", ",", "5.2`", ",", "5.5`", ",", 
       "4.8`", ",", "4.9`", ",", "4.7`", ",", "5.5`", ",", "6.`", ",", "5.6`",
        ",", "5.1`", ",", "5.7`", ",", "5.4`", ",", "5.4`", ",", "6.4`", ",", 
       "5.9`", ",", "5.6`", ",", "5.1`", ",", "5.6`", ",", "5.8`", ",", 
       "5.3`", ",", "5.6`", ",", "6.2`", ",", "5.6`", ",", "5.1`", ",", 
       "6.1`", ",", "5.3`", ",", "5.6`", ",", "5.1`", ",", "5.6`", ",", 
       "5.2`", ",", "5.4`", ",", "5.3`", ",", "5.1`", ",", "5.3`", ",", 
       "5.6`", ",", "5.2`", ",", "4.6`", ",", "5.2`", ",", "5.6`", ",", 
       "4.9`", ",", "5.4`", ",", "5.3`", ",", "5.`", ",", "5.4`", ",", "5.5`",
        ",", "5.2`", ",", "4.7`", ",", "5.7`", ",", "5.5`", ",", "5.2`", ",", 
       "5.4`", ",", "5.4`", ",", "5.2`", ",", "5.5`", ",", "5.2`", ",", "6.`",
        ",", "5.3`", ",", "5.7`", ",", "5.5`", ",", "4.9`", ",", "5.4`", ",", 
       "5.5`", ",", "5.7`", ",", "5.2`", ",", "5.9`", ",", "5.1`", ",", 
       "5.5`", ",", "5.7`", ",", "5.5`", ",", "5.4`", ",", "5.7`", ",", 
       "5.6`", ",", "5.3`", ",", "6.`", ",", "5.6`", ",", "5.`", ",", "5.5`", 
       ",", "5.2`", ",", "5.2`", ",", "5.6`", ",", "5.6`", ",", "5.5`", ",", 
       "4.6`", ",", "6.5`", ",", "5.5`", ",", "5.2`", ",", "5.2`", ",", 
       "5.4`", ",", "5.9`", ",", "5.4`", ",", "6.1`", ",", "4.7`", ",", 
       "5.8`", ",", "5.6`", ",", "5.3`", ",", "5.3`", ",", "5.2`", ",", 
       "5.9`", ",", "5.5`", ",", "5.5`", ",", "5.9`", ",", "4.8`", ",", 
       "5.7`", ",", "4.4`", ",", "5.2`", ",", "5.5`", ",", "5.6`", ",", 
       "6.2`", ",", "6.`", ",", "4.4`", ",", "5.2`", ",", "4.9`", ",", "5.1`",
        ",", "5.3`", ",", "5.8`", ",", "5.`", ",", "5.6`", ",", "5.4`", ",", 
       "5.6`", ",", "5.1`", ",", "5.2`", ",", "5.9`", ",", "5.3`", ",", 
       "5.1`", ",", "5.3`", ",", "5.6`", ",", "5.2`", ",", "5.7`", ",", 
       "4.1`", ",", "5.7`", ",", "4.8`", ",", "5.3`", ",", "5.6`", ",", 
       "5.5`", ",", "4.9`", ",", "5.`", ",", "5.6`", ",", "5.7`", ",", "5.6`",
        ",", "5.9`", ",", "5.3`", ",", "5.5`", ",", "5.3`", ",", "5.6`", ",", 
       "5.7`", ",", "5.8`", ",", "5.3`", ",", "4.8`", ",", "6.`", ",", "5.6`",
        ",", "5.8`", ",", "5.4`", ",", "5.4`", ",", "5.2`", ",", "5.6`", ",", 
       "5.5`", ",", "5.5`", ",", "5.7`", ",", "5.4`", ",", "5.7`", ",", "6.`",
        ",", "5.5`", ",", "5.7`", ",", "5.2`", ",", "5.4`", ",", "5.3`", ",", 
       "5.6`", ",", "5.6`", ",", "5.3`", ",", "5.1`", ",", "5.5`", ",", 
       "4.9`", ",", "5.6`", ",", "5.5`", ",", "5.1`", ",", "5.3`", ",", "5.`",
        ",", "5.4`", ",", "5.6`", ",", "5.6`", ",", "5.7`", ",", "5.3`", ",", 
       "5.3`", ",", "5.4`", ",", "5.5`", ",", "5.5`", ",", "5.3`", ",", 
       "5.3`", ",", "5.2`", ",", "5.3`", ",", "5.6`", ",", "5.5`", ",", 
       "5.4`", ",", "5.`", ",", "5.8`", ",", "5.2`", ",", "5.1`", ",", "5.6`",
        ",", "5.4`", ",", "5.2`", ",", "5.5`", ",", "5.5`", ",", "5.6`", ",", 
       "4.9`", ",", "5.`", ",", "5.2`", ",", "6.5`", ",", "6.1`", ",", "6.5`",
        ",", "5.3`", ",", "5.5`", ",", "5.6`", ",", "5.3`", ",", "5.2`", ",", 
       "5.5`", ",", "5.6`", ",", "5.5`", ",", "5.9`", ",", "5.5`", ",", 
       "5.8`", ",", "5.5`", ",", "5.8`", ",", "5.1`", ",", "5.3`", ",", 
       "5.8`", ",", "5.8`", ",", "5.2`", ",", "4.8`", ",", "5.4`", ",", 
       "5.3`", ",", "5.8`", ",", "5.6`", ",", "5.2`", ",", "4.8`", ",", 
       "5.2`", ",", "6.1`", ",", "5.4`", ",", "5.6`", ",", "4.9`", ",", "5.`",
        ",", "5.6`", ",", "4.4`", ",", "5.5`", ",", "6.1`", ",", "5.6`", ",", 
       "5.3`", ",", "6.1`", ",", "5.2`", ",", "4.8`", ",", "5.6`", ",", 
       "5.4`", ",", "4.9`", ",", "5.3`", ",", "5.3`", ",", "4.6`", ",", 
       "5.1`", ",", "5.3`", ",", "5.7`", ",", "5.8`", ",", "5.3`", ",", 
       "5.8`", ",", "5.7`", ",", "5.6`", ",", "5.8`", ",", "5.`", ",", "5.3`",
        ",", "5.`", ",", "5.1`", ",", "6.`", ",", "5.3`", ",", "5.9`", ",", 
       "5.8`", ",", "5.8`", ",", "5.4`", ",", "5.8`", ",", "5.8`", ",", 
       "4.9`", ",", "5.3`", ",", "4.9`", ",", "5.2`", ",", "5.3`", ",", 
       "5.3`", ",", "5.1`", ",", "5.4`", ",", "5.2`", ",", "5.8`", ",", 
       "5.2`", ",", "6.`", ",", "6.`", ",", "5.4`", ",", "5.6`", ",", "5.4`", 
       ",", "5.4`", ",", "5.5`", ",", "5.6`", ",", "5.7`", ",", "5.5`", ",", 
       "5.3`", ",", "5.6`", ",", "5.4`", ",", "5.4`", ",", "5.2`", ",", 
       "5.3`", ",", "5.6`", ",", "5.5`", ",", "4.9`", ",", "5.8`", ",", 
       "5.6`", ",", "5.9`", ",", "5.3`", ",", "5.1`", ",", "5.5`", ",", 
       "5.8`", ",", "5.8`", ",", "5.3`", ",", "5.1`", ",", "5.3`", ",", 
       "5.6`", ",", "6.1`", ",", "5.6`", ",", "6.`", ",", "5.6`", ",", "5.5`",
        ",", "6.`", ",", "5.5`", ",", "5.1`", ",", "5.1`", ",", "6.`", ",", 
       "5.6`", ",", "5.4`", ",", "5.3`", ",", "5.3`", ",", "6.1`", ",", "6.`",
        ",", "5.3`", ",", "5.6`", ",", "6.`", ",", "5.5`", ",", "5.6`", ",", 
       "5.2`", ",", "5.6`", ",", "5.2`", ",", "5.4`", ",", "5.3`", ",", 
       "5.7`", ",", "5.1`", ",", "5.6`", ",", "5.2`", ",", "5.2`", ",", "5.`",
        ",", "5.6`", ",", "5.4`", ",", "5.1`", ",", "5.6`", ",", "5.6`", ",", 
       "4.9`", ",", "5.2`", ",", "5.1`", ",", "5.8`", ",", "5.8`", ",", 
       "4.9`", ",", "5.2`", ",", "5.6`", ",", "5.6`", ",", "5.7`", ",", 
       "5.3`", ",", "5.6`", ",", "5.6`", ",", "5.3`", ",", "5.6`", ",", 
       "5.3`", ",", "4.4`", ",", "5.4`", ",", "5.5`", ",", "4.7`", ",", 
       "4.9`", ",", "5.5`", ",", "5.4`", ",", "5.3`", ",", "5.6`", ",", 
       "5.6`", ",", "5.7`", ",", "5.2`", ",", "5.5`", ",", "5.2`", ",", 
       "5.1`", ",", "5.9`", ",", "5.3`", ",", "5.2`", ",", "5.7`", ",", 
       "5.7`", ",", "5.9`", ",", "5.6`", ",", "5.5`", ",", "5.5`", ",", 
       "5.4`", ",", "6.3`", ",", "5.2`", ",", "5.3`", ",", "5.3`", ",", 
       "5.2`", ",", "5.7`", ",", "5.6`", ",", "5.3`", ",", "5.`", ",", "5.4`",
        ",", "5.6`", ",", "4.8`", ",", "5.4`", ",", "4.9`", ",", "5.6`", ",", 
       "5.4`", ",", "5.9`", ",", "4.9`", ",", "5.3`", ",", "5.5`", ",", 
       "5.2`", ",", "5.7`", ",", "5.6`", ",", "5.5`", ",", "6.3`", ",", 
       "5.7`", ",", "5.7`", ",", "4.8`", ",", "5.5`", ",", "5.`", ",", "5.7`",
        ",", "5.5`", ",", "5.8`", ",", "5.`", ",", "6.2`", ",", "5.6`", ",", 
       "5.4`", ",", "5.3`", ",", "5.2`", ",", "5.5`", ",", "4.8`", ",", 
       "5.7`", ",", "5.4`", ",", "5.8`", ",", "5.1`", ",", "5.1`", ",", 
       "4.8`", ",", "5.3`", ",", "5.`", ",", "5.4`", ",", "5.4`", ",", "5.`", 
       ",", "5.`", ",", "5.7`", ",", "5.2`", ",", "5.4`", ",", "6.2`", ",", 
       "5.2`", ",", "5.8`", ",", "5.6`", ",", "6.`", ",", "5.2`", ",", "5.4`",
        ",", "4.6`", ",", "5.6`", ",", "5.5`", ",", "5.5`", ",", "5.3`", ",", 
       "5.2`", ",", "5.8`", ",", "5.7`", ",", "5.6`", ",", "5.3`", ",", 
       "5.8`", ",", "5.3`", ",", "5.7`", ",", "5.3`", ",", "5.8`", ",", 
       "5.7`", ",", "5.5`", ",", "5.6`", ",", "5.4`", ",", "5.4`", ",", "6.`",
        ",", "5.9`", ",", "5.2`", ",", "6.4`", ",", "5.6`", ",", "5.7`", ",", 
       "5.7`", ",", "5.`", ",", "5.4`", ",", "5.4`", ",", "5.4`", ",", "6.`", 
       ",", "5.6`", ",", "4.8`", ",", "5.3`", ",", "5.3`", ",", "5.4`", ",", 
       "6.`", ",", "5.3`", ",", "5.3`", ",", "5.3`", ",", "5.8`", ",", "5.`", 
       ",", "5.4`", ",", "5.6`", ",", "5.7`", ",", "5.7`", ",", "5.5`", ",", 
       "5.9`", ",", "5.8`", ",", "5.3`", ",", "5.8`", ",", "6.`", ",", "5.3`",
        ",", "5.6`", ",", "5.6`", ",", "5.3`", ",", "6.`", ",", "5.9`", ",", 
       "5.3`", ",", "5.2`", ",", "4.6`", ",", "5.5`", ",", "5.7`", ",", 
       "5.4`", ",", "5.4`", ",", "6.`", ",", "5.5`", ",", "5.8`", ",", "5.2`",
        ",", "5.7`", ",", "5.5`", ",", "5.5`", ",", "5.`", ",", "5.7`", ",", 
       "5.5`", ",", "5.`", ",", "5.1`", ",", "5.3`", ",", "5.4`", ",", "5.7`",
        ",", "5.8`", ",", "5.7`", ",", "5.7`", ",", "5.`", ",", "5.2`", ",", 
       "5.`", ",", "5.3`", ",", "5.1`", ",", "5.1`", ",", "5.1`", ",", "5.2`",
        ",", "5.9`", ",", "6.1`", ",", "5.4`", ",", "4.9`", ",", "5.5`", ",", 
       "5.5`", ",", "5.2`", ",", "5.6`", ",", "5.6`", ",", "5.5`", ",", 
       "6.6`", ",", "5.6`", ",", "4.7`", ",", "5.2`", ",", "5.3`", ",", 
       "5.8`", ",", "5.3`", ",", "6.`", ",", "4.8`", ",", "5.4`", ",", "5.6`",
        ",", "5.6`", ",", "5.6`", ",", "5.9`", ",", "5.9`", ",", "6.1`", ",", 
       "5.3`", ",", "5.7`", ",", "5.3`", ",", "5.4`", ",", "5.2`", ",", 
       "5.6`", ",", "5.7`", ",", "6.`", ",", "6.1`", ",", "5.2`", ",", "5.5`",
        ",", "6.`", ",", "5.6`", ",", "5.8`", ",", "4.8`", ",", "5.5`", ",", 
       "5.3`", ",", "5.1`", ",", "5.8`", ",", "5.1`", ",", "4.9`", ",", 
       "5.7`", ",", "5.6`", ",", "5.8`", ",", "5.8`", ",", "5.5`", ",", 
       "5.1`", ",", "5.6`", ",", "6.`", ",", "5.3`", ",", "5.3`", ",", "5.7`",
        ",", "5.3`", ",", "4.6`", ",", "5.4`", ",", "5.9`", ",", "5.7`", ",", 
       "5.4`", ",", "5.5`", ",", "5.2`", ",", "5.8`", ",", "6.`", ",", "5.8`",
        ",", "5.4`", ",", "5.6`", ",", "5.9`", ",", "5.7`", ",", "5.6`", ",", 
       "5.2`", ",", "5.4`", ",", "5.7`", ",", "5.4`", ",", "5.9`", ",", 
       "5.3`", ",", "4.9`", ",", "6.2`", ",", "5.9`", ",", "5.4`", ",", 
       "5.2`", ",", "5.9`", ",", "5.8`", ",", "6.`", ",", "5.7`", ",", "5.2`",
        ",", "6.1`", ",", "5.8`", ",", "5.1`", ",", "5.8`", ",", "5.5`", ",", 
       "6.1`", ",", "5.4`", ",", "6.3`", ",", "5.3`", ",", "5.2`", ",", 
       "5.8`", ",", "5.3`", ",", "5.2`", ",", "5.2`", ",", "6.`", ",", "5.1`",
        ",", "5.5`", ",", "5.8`", ",", "5.3`", ",", "5.3`", ",", "5.6`", ",", 
       "5.3`", ",", "5.5`", ",", "4.9`", ",", "5.7`", ",", "5.4`", ",", 
       "6.7`", ",", "5.7`", ",", "5.4`", ",", "5.7`", ",", "5.4`", ",", 
       "5.1`", ",", "5.4`", ",", "5.8`", ",", "5.5`", ",", "5.5`", ",", 
       "5.8`", ",", "5.5`", ",", "5.5`", ",", "5.3`", ",", "4.9`", ",", 
       "5.7`", ",", "5.7`", ",", "5.2`", ",", "5.3`", ",", "5.9`", ",", 
       "4.6`", ",", "5.3`", ",", "5.5`", ",", "5.1`", ",", "5.3`", ",", 
       "6.1`", ",", "4.9`", ",", "5.8`", ",", "5.9`", ",", "6.`", ",", "5.5`",
        ",", "5.8`", ",", "5.9`", ",", "6.4`", ",", "5.8`", ",", "5.9`", ",", 
       "5.2`", ",", "5.2`", ",", "4.8`", ",", "5.3`", ",", "5.4`", ",", 
       "5.8`", ",", "4.9`", ",", "5.5`", ",", "5.4`", ",", "5.2`", ",", 
       "5.4`", ",", "6.1`", ",", "5.5`", ",", "5.9`", ",", "5.9`", ",", 
       "5.7`", ",", "5.5`", ",", "5.6`", ",", "5.5`", ",", "6.3`", ",", 
       "5.5`", ",", "5.1`", ",", "5.5`", ",", "6.`", ",", "5.3`", ",", "5.7`",
        ",", "5.1`", ",", "4.4`", ",", "5.7`", ",", "5.3`", ",", "5.4`", ",", 
       "5.2`", ",", "5.9`", ",", "5.4`", ",", "5.3`", ",", "5.8`", ",", 
       "5.5`", ",", "5.6`", ",", "5.2`", ",", "6.`", ",", "5.8`", ",", "5.6`",
        ",", "5.4`", ",", "5.4`", ",", "5.4`", ",", "5.4`", ",", "5.3`", ",", 
       "5.5`", ",", "5.3`", ",", "5.5`", ",", "5.2`", ",", "5.3`", ",", 
       "5.5`", ",", "5.6`", ",", "6.4`", ",", "5.7`", ",", "6.1`", ",", 
       "4.8`", ",", "5.4`", ",", "5.6`", ",", "5.5`", ",", "5.2`", ",", 
       "5.5`", ",", "6.2`", ",", "5.4`", ",", "5.6`", ",", "5.9`", ",", 
       "5.3`", ",", "5.5`", ",", "5.3`", ",", "5.4`", ",", "5.7`", ",", 
       "5.4`", ",", "5.`", ",", "5.5`", ",", "5.2`", ",", "5.4`", ",", "5.4`",
        ",", "5.8`", ",", "5.6`", ",", "6.1`", ",", "4.8`", ",", "5.1`", ",", 
       "5.8`", ",", "5.3`", ",", "5.8`", ",", "6.`", ",", "6.3`", ",", "5.2`",
        ",", "5.4`", ",", "5.3`", ",", "5.4`", ",", "5.3`", ",", "5.4`", ",", 
       "6.3`", ",", "5.`", ",", "5.7`", ",", "5.2`", ",", "5.2`", ",", "5.5`",
        ",", "5.2`", ",", "6.3`", ",", "5.2`", ",", "5.6`", ",", "5.8`", ",", 
       "5.9`", ",", "5.7`", ",", "5.`", ",", "5.5`", ",", "5.5`", ",", "5.8`",
        ",", "5.3`", ",", "5.3`", ",", "5.9`", ",", "5.9`", ",", "5.4`", ",", 
       "5.3`", ",", "5.2`", ",", "5.4`", ",", "5.5`", ",", "5.8`", ",", "6.`",
        ",", "5.7`", ",", "5.5`", ",", "6.`", ",", "5.6`", ",", "5.6`", ",", 
       "5.5`", ",", "4.7`", ",", "5.8`", ",", "5.8`", ",", "4.9`", ",", 
       "5.5`", ",", "5.4`", ",", "5.3`", ",", "5.`", ",", "5.5`", ",", "5.5`",
        ",", "5.5`", ",", "5.7`", ",", "5.3`", ",", "4.9`", ",", "5.7`", ",", 
       "6.2`", ",", "5.`", ",", "5.2`", ",", "5.3`", ",", "5.8`", ",", "5.2`",
        ",", "6.`", ",", "6.`", ",", "5.5`", ",", "5.5`", ",", "5.2`", ",", 
       "5.7`", ",", "5.5`", ",", "5.1`", ",", "5.3`", ",", "5.4`", ",", 
       "5.4`", ",", "5.8`", ",", "5.5`", ",", "5.9`", ",", "6.2`", ",", 
       "5.5`", ",", "5.3`", ",", "5.7`", ",", "6.4`", ",", "5.1`", ",", 
       "5.4`", ",", "5.3`", ",", "5.8`", ",", "5.6`", ",", "5.8`", ",", 
       "5.8`", ",", "5.8`", ",", "5.4`", ",", "5.2`", ",", "5.2`", ",", 
       "5.5`", ",", "5.7`", ",", "5.2`", ",", "5.1`", ",", "5.8`", ",", 
       "5.6`", ",", "5.7`", ",", "5.9`", ",", "6.2`", ",", "5.1`", ",", 
       "6.1`", ",", "5.5`", ",", "5.7`", ",", "6.`", ",", "6.3`", ",", "5.5`",
        ",", "5.2`", ",", "4.7`", ",", "5.3`", ",", "5.7`", ",", "5.2`", ",", 
       "5.5`", ",", "5.`", ",", "5.1`", ",", "5.9`", ",", "5.3`", ",", "5.`", 
       ",", "5.3`", ",", "5.3`", ",", "5.4`", ",", "5.5`", ",", "5.6`", ",", 
       "5.3`", ",", "5.3`", ",", "5.9`", ",", "5.6`", ",", "5.1`", ",", 
       "5.6`", ",", "5.8`", ",", "5.6`", ",", "6.5`", ",", "6.`", ",", "5.4`",
        ",", "5.9`", ",", "5.7`", ",", "5.6`", ",", "6.1`", ",", "5.7`", ",", 
       "5.6`", ",", "4.3`", ",", "5.8`", ",", "5.7`", ",", "5.4`", ",", 
       "6.7`", ",", "5.9`", ",", "6.1`", ",", "5.1`", ",", "5.5`", ",", 
       "5.9`", ",", "5.7`", ",", "4.9`", ",", "5.6`", ",", "5.8`", ",", 
       "5.6`", ",", "5.6`", ",", "5.1`", ",", "5.8`", ",", "5.3`", ",", 
       "5.3`", ",", "5.5`", ",", "5.7`", ",", "5.6`", ",", "5.2`", ",", 
       "5.9`", ",", "5.1`", ",", "5.4`", ",", "5.8`", ",", "6.1`", ",", 
       "5.3`", ",", "5.4`", ",", "6.3`", ",", "5.6`", ",", "5.8`", ",", 
       "5.5`", ",", "5.3`", ",", "5.2`", ",", "5.7`", ",", "5.4`", ",", 
       "5.4`", ",", "5.3`", ",", "5.8`", ",", "5.3`", ",", "4.8`", ",", 
       "5.8`", ",", "5.5`", ",", "5.6`", ",", "5.7`", ",", "5.6`", ",", 
       "5.1`", ",", "5.9`", ",", "5.9`", ",", "5.2`", ",", "5.3`", ",", 
       "5.2`", ",", "6.`", ",", "5.5`", ",", "5.1`", ",", "5.6`", ",", "5.4`",
        ",", "5.4`", ",", "5.2`", ",", "5.6`", ",", "5.7`", ",", "5.5`", ",", 
       "5.7`", ",", "5.4`", ",", "5.4`", ",", "5.5`", ",", "5.2`", ",", 
       "4.9`", ",", "5.7`", ",", "5.4`", ",", "5.7`", ",", "5.5`", ",", 
       "5.4`", ",", "5.6`", ",", "5.6`", ",", "5.5`", ",", "4.8`", ",", "6.`",
        ",", "4.8`", ",", "5.8`", ",", "4.5`", ",", "5.4`", ",", "5.2`", ",", 
       "5.7`", ",", "5.5`", ",", "5.6`", ",", "5.2`", ",", "5.6`", ",", 
       "5.7`", ",", "5.9`", ",", "4.5`", ",", "5.2`", ",", "5.9`", ",", 
       "5.5`", ",", "5.4`", ",", "5.8`", ",", "5.5`", ",", "5.6`", ",", 
       "4.9`", ",", "5.6`", ",", "5.3`", ",", "6.4`", ",", "5.2`", ",", 
       "5.4`", ",", "5.`", ",", "5.4`", ",", "5.7`", ",", "5.8`", ",", "5.7`",
        ",", "5.8`", ",", "6.`", ",", "5.2`", ",", "5.5`", ",", "5.5`", ",", 
       "5.3`", ",", "5.3`", ",", "5.3`", ",", "5.8`", ",", "5.4`", ",", 
       "5.5`", ",", "6.1`", ",", "5.2`", ",", "5.8`", ",", "5.7`", ",", 
       "5.5`", ",", "5.6`", ",", "5.4`", ",", "4.5`", ",", "5.8`", ",", 
       "5.5`", ",", "5.2`", ",", "5.3`", ",", "5.9`", ",", "5.`", ",", "4.7`",
        ",", "5.2`", ",", "6.`", ",", "5.1`", ",", "5.6`", ",", "5.6`", ",", 
       "5.3`", ",", "5.`", ",", "5.6`", ",", "5.7`", ",", "5.7`", ",", "6.2`",
        ",", "5.6`", ",", "5.5`", ",", "5.6`", ",", "5.2`", ",", "5.2`", ",", 
       "5.2`", ",", "5.8`", ",", "5.4`", ",", "6.1`", ",", "5.3`", ",", "5.`",
        ",", "5.8`", ",", "5.4`", ",", "5.`", ",", "5.4`", ",", "5.7`", ",", 
       "5.5`", ",", "5.8`", ",", "5.9`", ",", "5.2`", ",", "5.6`", ",", 
       "4.7`", ",", "5.5`", ",", "5.6`", ",", "5.2`", ",", "5.6`", ",", 
       "5.9`", ",", "4.9`", ",", "5.4`", ",", "5.1`", ",", "5.3`", ",", 
       "5.2`", ",", "5.`", ",", "5.6`", ",", "6.1`", ",", "6.2`", ",", "5.5`",
        ",", "6.`", ",", "5.7`", ",", "5.8`", ",", "5.4`", ",", "6.`", ",", 
       "5.5`", ",", "5.4`", ",", "5.5`", ",", "5.6`", ",", "5.4`", ",", "5.`",
        ",", "5.3`", ",", "4.8`", ",", "5.6`", ",", "5.6`", ",", "5.7`", ",", 
       "5.5`", ",", "4.8`", ",", "5.5`", ",", "6.3`", ",", "5.6`", ",", 
       "5.5`", ",", "5.5`", ",", "5.6`", ",", "5.5`", ",", "5.1`", ",", 
       "5.4`", ",", "5.6`", ",", "5.4`", ",", "5.6`", ",", "5.7`", ",", 
       "5.6`", ",", "5.3`", ",", "5.2`", ",", "5.4`", ",", "6.1`", ",", 
       "5.8`", ",", "5.2`", ",", "5.1`", ",", "5.5`", ",", "5.9`", ",", 
       "5.6`", ",", "5.5`", ",", "5.4`", ",", "5.1`", ",", "5.3`", ",", 
       "5.5`", ",", "5.5`", ",", "5.4`", ",", "5.9`", ",", "5.6`", ",", 
       "5.7`", ",", "5.2`", ",", "5.5`", ",", "5.2`", ",", "5.5`", ",", 
       "5.3`", ",", "5.2`", ",", "6.1`", ",", "5.6`", ",", "5.7`", ",", 
       "5.3`", ",", "5.7`", ",", "5.6`", ",", "5.2`", ",", "5.4`", ",", 
       "5.7`", ",", "5.1`", ",", "5.7`", ",", "5.6`", ",", "5.3`", ",", 
       "5.5`", ",", "5.3`", ",", "5.1`", ",", "5.4`", ",", "6.`", ",", "4.6`",
        ",", "6.4`", ",", "5.9`", ",", "5.6`", ",", "5.3`", ",", "5.7`", ",", 
       "5.7`", ",", "6.1`", ",", "5.5`", ",", "5.3`", ",", "5.8`", ",", 
       "4.8`", ",", "5.`", ",", "5.2`", ",", "5.3`", ",", "5.`", ",", "5.6`", 
       ",", "4.9`", ",", "5.6`", ",", "5.8`", ",", "5.8`", ",", "6.`", ",", 
       "4.9`", ",", "5.6`", ",", "5.`", ",", "6.2`", ",", "5.7`", ",", "5.4`",
        ",", "5.2`", ",", "4.7`", ",", "5.6`", ",", "5.7`", ",", "5.7`", ",", 
       "5.2`", ",", "5.6`", ",", "6.1`", ",", "5.4`", ",", "5.5`", ",", 
       "5.7`", ",", "4.9`", ",", "6.3`", ",", "6.`", ",", "5.4`", ",", "5.7`",
        ",", "5.9`", ",", "4.9`", ",", "5.4`", ",", "5.3`", ",", "4.9`", ",", 
       "5.9`", ",", "5.2`", ",", "5.8`", ",", "5.6`", ",", "5.9`", ",", 
       "5.3`", ",", "5.1`", ",", "5.1`", ",", "6.3`", ",", "5.4`", ",", 
       "5.2`", ",", "6.`", ",", "5.5`", ",", "5.3`", ",", "5.9`", ",", "5.3`",
        ",", "5.9`", ",", "5.3`", ",", "5.7`", ",", "5.4`", ",", "4.7`", ",", 
       "4.9`", ",", "5.6`", ",", "5.2`", ",", "5.6`", ",", "5.8`", ",", "6.`",
        ",", "6.3`", ",", "5.1`", ",", "6.4`", ",", "5.3`", ",", "5.9`", ",", 
       "5.6`", ",", "5.2`", ",", "5.9`", ",", "5.4`", ",", "5.7`", ",", 
       "5.1`", ",", "5.4`", ",", "5.6`", ",", "5.1`", ",", "5.4`", ",", 
       "4.9`", ",", "5.2`", ",", "5.4`", ",", "5.6`", ",", "5.4`", ",", 
       "5.3`", ",", "5.1`", ",", "5.9`", ",", "5.5`", ",", "5.3`", ",", 
       "5.1`", ",", "6.2`", ",", "5.3`", ",", "4.8`", ",", "5.5`", ",", 
       "5.4`", ",", "5.6`", ",", "5.3`", ",", "5.`", ",", "5.`", ",", "5.8`", 
       ",", "5.2`", ",", "5.3`", ",", "6.4`", ",", "6.`", ",", "5.4`", ",", 
       "5.6`", ",", "5.`", ",", "5.4`", ",", "5.6`", ",", "5.2`", ",", "6.3`",
        ",", "5.4`", ",", "5.1`", ",", "5.5`", ",", "5.1`", ",", "5.5`", ",", 
       "5.`", ",", "5.4`", ",", "5.7`", ",", "6.7`", ",", "5.5`", ",", "5.1`",
        ",", "6.`", ",", "5.4`", ",", "5.4`", ",", "6.`", ",", "5.4`", ",", 
       "5.4`", ",", "5.2`", ",", "5.9`", ",", "5.`", ",", "5.6`", ",", "5.`", 
       ",", "5.6`", ",", "5.2`", ",", "5.5`", ",", "5.2`", ",", "5.2`", ",", 
       "5.7`", ",", "4.8`", ",", "5.8`", ",", "6.`", ",", "5.`", ",", "5.7`", 
       ",", "5.4`", ",", "5.6`", ",", "5.7`", ",", "6.8`", ",", "5.4`", ",", 
       "5.5`", ",", "5.6`", ",", "5.1`", ",", "5.4`", ",", "4.8`", ",", "6.`",
        ",", "5.3`", ",", "5.7`", ",", "5.5`", ",", "4.7`", ",", "5.8`", ",", 
       "5.5`", ",", "5.6`", ",", "5.5`", ",", "5.1`", ",", "5.6`", ",", 
       "5.5`", ",", "5.6`", ",", "4.9`", ",", "4.9`", ",", "5.`", ",", "5.5`",
        ",", "5.6`", ",", "5.4`", ",", "5.5`", ",", "5.4`", ",", "5.2`", ",", 
       "5.3`", ",", "6.1`", ",", "5.1`", ",", "5.3`", ",", "5.3`", ",", "5.`",
        ",", "5.2`", ",", "5.7`", ",", "5.9`", ",", "5.2`", ",", "5.6`", ",", 
       "4.8`", ",", "5.7`", ",", "5.2`", ",", "5.7`", ",", "5.8`", ",", 
       "4.7`", ",", "5.5`", ",", "5.2`", ",", "4.9`", ",", "5.8`", ",", 
       "6.2`", ",", "5.5`", ",", "5.2`", ",", "5.8`", ",", "6.2`", ",", 
       "5.6`", ",", "5.3`", ",", "5.3`", ",", "5.3`", ",", "5.7`", ",", "5.`",
        ",", "4.8`", ",", "5.6`", ",", "5.9`", ",", "5.3`", ",", "5.5`", ",", 
       "5.2`", ",", "5.`", ",", "6.1`", ",", "5.6`", ",", "5.8`", ",", "5.6`",
        ",", "5.3`", ",", "5.5`", ",", "5.1`", ",", "5.4`", ",", "5.8`", ",", 
       "5.2`", ",", "5.6`", ",", "5.7`", ",", "5.8`", ",", "5.5`", ",", "6.`",
        ",", "5.5`", ",", "5.9`", ",", "6.`", ",", "5.4`", ",", "5.9`", ",", 
       "5.6`", ",", "6.1`", ",", "5.5`", ",", "5.3`", ",", "5.5`", ",", "5.`",
        ",", "6.6`", ",", "5.1`", ",", "4.6`", ",", "5.7`", ",", "5.5`", ",", 
       "5.6`", ",", "5.8`", ",", "5.5`", ",", "5.5`", ",", "5.7`", ",", 
       "5.3`", ",", "5.5`", ",", "5.8`", ",", "4.5`", ",", "5.`", ",", "5.9`",
        ",", "5.6`", ",", "5.`", ",", "5.1`", ",", "5.1`", ",", "5.1`", ",", 
       "5.6`", ",", "6.`", ",", "5.4`", ",", "5.5`", ",", "5.7`", ",", "5.4`",
        ",", "6.`", ",", "5.6`", ",", "5.4`", ",", "5.1`", ",", "5.3`", ",", 
       "5.7`", ",", "5.3`", ",", "5.4`", ",", "5.5`", ",", "5.`", ",", "5.7`",
        ",", "5.5`", ",", "4.9`", ",", "4.7`", ",", "5.2`", ",", "4.9`", ",", 
       "5.5`", ",", "5.7`", ",", "5.8`", ",", "5.4`", ",", "4.9`", ",", 
       "6.3`", ",", "5.9`", ",", "4.7`", ",", "5.`", ",", "5.3`", ",", "6.`", 
       ",", "5.5`", ",", "5.7`", ",", "5.7`", ",", "5.5`", ",", "5.7`", ",", 
       "5.1`", ",", "5.6`", ",", "5.8`", ",", "5.1`", ",", "5.1`", ",", 
       "5.5`", ",", "5.7`", ",", "6.2`", ",", "5.5`", ",", "5.3`", ",", 
       "5.4`", ",", "5.5`", ",", "5.5`", ",", "5.8`", ",", "6.2`", ",", "5.`",
        ",", "5.5`", ",", "5.1`", ",", "5.4`", ",", "5.7`", ",", "5.3`", ",", 
       "6.`", ",", "5.3`", ",", "5.3`", ",", "5.5`", ",", "6.1`", ",", "5.6`",
        ",", "5.3`", ",", "5.3`", ",", "5.7`", ",", "5.9`", ",", "5.3`", ",", 
       "5.1`", ",", "5.6`", ",", "5.9`", ",", "5.5`", ",", "4.4`", ",", 
       "6.1`", ",", "5.5`", ",", "5.4`", ",", "5.1`", ",", "5.2`", ",", "6.`",
        ",", "5.4`", ",", "5.2`", ",", "5.4`", ",", "6.`", ",", "5.4`", ",", 
       "5.1`", ",", "4.4`", ",", "4.6`", ",", "5.5`", ",", "4.8`", ",", 
       "5.6`", ",", "6.`", ",", "6.4`", ",", "5.7`", ",", "5.7`", ",", "5.9`",
        ",", "5.5`", ",", "5.5`", ",", "5.7`", ",", "5.5`", ",", "5.1`", ",", 
       "5.4`", ",", "5.8`", ",", "4.8`", ",", "5.3`", ",", "3.8`", ",", 
       "4.2`", ",", "6.`", ",", "5.3`", ",", "5.4`", ",", "5.6`", ",", "5.8`",
        ",", "5.3`", ",", "6.3`", ",", "5.2`", ",", "4.8`", ",", "4.8`", ",", 
       "4.9`", ",", "5.9`", ",", "5.4`", ",", "5.5`", ",", "6.1`", ",", 
       "5.8`", ",", "6.`", ",", "5.4`", ",", "6.1`", ",", "5.1`", ",", "5.7`",
        ",", "5.5`", ",", "6.2`", ",", "6.5`", ",", "5.7`", ",", "5.9`", ",", 
       "5.6`", ",", "5.9`", ",", "6.4`", ",", "5.5`", ",", "5.7`", ",", 
       "6.1`", ",", "5.2`", ",", "5.7`", ",", "5.6`", ",", "5.7`", ",", 
       "5.8`", ",", "5.4`", ",", "5.`", ",", "6.`", ",", "5.7`", ",", "5.6`", 
       ",", "5.`", ",", "5.4`", ",", "6.1`", ",", "6.`", ",", "6.`", ",", 
       "6.3`", ",", "5.8`", ",", "6.1`", ",", "5.6`", ",", "5.5`", ",", 
       "5.5`", ",", "6.4`", ",", "4.5`", ",", "5.7`", ",", "5.9`", ",", 
       "4.7`", ",", "5.4`", ",", "5.7`", ",", "5.5`", ",", "5.1`", ",", 
       "5.8`", ",", "5.5`", ",", "6.`", ",", "4.3`", ",", "5.5`", ",", "6.`", 
       ",", "5.6`", ",", "5.1`", ",", "5.8`", ",", "5.4`", ",", "6.`", ",", 
       "5.5`", ",", "5.5`", ",", "5.6`", ",", "5.7`", ",", "6.4`", ",", 
       "5.3`", ",", "4.8`", ",", "5.1`", ",", "5.5`", ",", "5.3`", ",", "6.`",
        ",", "6.`", ",", "5.4`", ",", "5.5`", ",", "5.5`", ",", "5.1`", ",", 
       "5.3`", ",", "5.2`", ",", "6.`", ",", "5.9`", ",", "5.6`", ",", "5.`", 
       ",", "5.6`", ",", "5.2`", ",", "5.8`", ",", "5.6`", ",", "5.5`", ",", 
       "6.1`", ",", "5.5`", ",", "5.5`", ",", "5.6`", ",", "5.4`", ",", 
       "5.4`", ",", "5.3`", ",", "5.7`", ",", "5.5`", ",", "5.2`", ",", 
       "5.6`", ",", "6.1`", ",", "5.5`", ",", "4.8`", ",", "5.3`", ",", 
       "5.7`", ",", "4.9`", ",", "5.8`", ",", "5.9`", ",", "6.3`", ",", "5.`",
        ",", "5.8`", ",", "5.4`", ",", "5.4`", ",", "5.8`", ",", "5.6`", ",", 
       "5.9`", ",", "5.6`", ",", "5.5`", ",", "5.6`", ",", "5.6`", ",", 
       "5.5`", ",", "5.1`", ",", "5.7`", ",", "6.3`", ",", "5.`", ",", "5.3`",
        ",", "5.5`", ",", "4.6`", ",", "6.`", ",", "5.3`", ",", "5.`", ",", 
       "4.7`", ",", "6.1`", ",", "5.2`", ",", "5.9`", ",", "5.6`", ",", 
       "5.6`", ",", "6.`", ",", "4.5`", ",", "5.2`", ",", "5.2`", ",", "6.2`",
        ",", "5.6`", ",", "5.2`", ",", "5.5`", ",", "5.3`", ",", "5.1`", ",", 
       "5.5`", ",", "5.8`", ",", "5.2`", ",", "5.5`", ",", "5.8`", ",", 
       "5.4`", ",", "5.6`", ",", "5.3`", ",", "5.6`", ",", "5.7`", ",", 
       "5.3`", ",", "6.1`", ",", "5.3`", ",", "5.6`", ",", "5.1`", ",", "6.`",
        ",", "5.8`", ",", "5.4`", ",", "5.2`", ",", "5.4`", ",", "5.3`", ",", 
       "4.8`", ",", "5.3`", ",", "5.5`", ",", "5.5`", ",", "5.1`", ",", 
       "5.7`", ",", "5.5`", ",", "5.8`", ",", "5.3`", ",", "5.2`", ",", 
       "5.5`", ",", "5.2`", ",", "5.7`", ",", "5.6`", ",", "5.6`", ",", 
       "4.1`", ",", "5.6`", ",", "6.`", ",", "6.1`", ",", "5.8`", ",", "5.8`",
        ",", "5.5`", ",", "5.9`", ",", "5.1`", ",", "5.8`", ",", "5.2`", ",", 
       "6.`", ",", "5.`", ",", "5.6`", ",", "5.3`", ",", "6.`", ",", "5.3`", 
       ",", "5.5`", ",", "5.9`", ",", "5.5`", ",", "4.9`", ",", "5.4`", ",", 
       "5.3`", ",", "4.9`", ",", "5.`", ",", "5.3`", ",", "5.5`", ",", "6.`", 
       ",", "5.3`", ",", "5.6`", ",", "5.1`", ",", "5.4`", ",", "5.6`", ",", 
       "5.6`", ",", "5.6`", ",", "5.`", ",", "5.9`", ",", "4.9`", ",", "5.5`",
        ",", "5.2`", ",", "5.5`", ",", "5.3`", ",", "5.3`", ",", "5.5`", ",", 
       "5.2`", ",", "6.1`", ",", "5.4`", ",", "5.5`", ",", "5.`", ",", "5.5`",
        ",", "5.7`", ",", "5.`", ",", "5.3`", ",", "5.6`", ",", "5.1`", ",", 
       "5.7`", ",", "6.5`", ",", "5.3`", ",", "5.6`", ",", "5.2`", ",", 
       "5.5`", ",", "5.3`", ",", "4.9`", ",", "4.4`", ",", "5.7`", ",", 
       "5.4`", ",", "5.5`", ",", "5.2`", ",", "5.7`", ",", "5.4`", ",", 
       "5.4`", ",", "5.6`", ",", "5.6`", ",", "4.9`", ",", "5.9`", ",", 
       "5.4`", ",", "6.3`", ",", "5.2`", ",", "5.3`", ",", "5.7`", ",", 
       "5.5`", ",", "5.7`", ",", "5.2`", ",", "5.9`", ",", "5.5`", ",", 
       "5.6`", ",", "5.7`", ",", "5.2`", ",", "5.1`", ",", "5.1`", ",", 
       "5.7`", ",", "6.`", ",", "5.7`", ",", "5.7`", ",", "5.3`", ",", "5.5`",
        ",", "5.4`", ",", "5.3`", ",", "5.3`", ",", "5.8`", ",", "5.1`", ",", 
       "5.7`", ",", "4.8`", ",", "5.2`", ",", "5.5`", ",", "6.`", ",", "5.9`",
        ",", "4.2`", ",", "5.9`", ",", "5.7`", ",", "5.5`", ",", "5.4`", ",", 
       "5.3`", ",", "5.5`", ",", "5.`", ",", "5.6`", ",", "5.2`", ",", "5.6`",
        ",", "5.2`", ",", "5.4`", ",", "5.9`", ",", "5.3`", ",", "5.5`", ",", 
       "5.6`", ",", "4.9`", ",", "5.4`", ",", "6.`", ",", "6.1`", ",", "5.6`",
        ",", "6.6`", ",", "5.5`", ",", "5.3`", ",", "6.`", ",", "5.3`", ",", 
       "5.`", ",", "5.9`", ",", "5.2`", ",", "5.6`", ",", "5.3`", ",", "5.8`",
        ",", "5.`", ",", "5.4`", ",", "5.1`", ",", "5.5`", ",", "5.8`", ",", 
       "5.4`", ",", "5.1`", ",", "5.6`", ",", "5.1`", ",", "6.2`", ",", 
       "5.3`", ",", "6.`", ",", "5.3`", ",", "6.`", ",", "5.4`", ",", "5.2`", 
       ",", "5.4`", ",", "5.5`", ",", "5.8`", ",", "5.9`", ",", "5.6`", ",", 
       "5.5`", ",", "5.5`", ",", "5.4`", ",", "5.3`", ",", "5.4`", ",", 
       "6.3`", ",", "5.7`", ",", "5.3`", ",", "5.6`", ",", "5.6`", ",", 
       "5.4`", ",", "5.7`", ",", "5.4`", ",", "5.4`", ",", "6.`", ",", "5.5`",
        ",", "6.3`", ",", "5.8`", ",", "5.4`", ",", "5.1`", ",", "5.1`", ",", 
       "5.3`", ",", "4.8`", ",", "5.9`", ",", "5.7`", ",", "4.9`", ",", 
       "5.1`", ",", "5.9`", ",", "5.2`", ",", "6.`", ",", "5.2`", ",", "5.1`",
        ",", "6.`", ",", "5.3`", ",", "5.8`", ",", "5.6`", ",", "6.`", ",", 
       "5.7`", ",", "4.4`", ",", "6.3`", ",", "5.6`", ",", "5.4`", ",", 
       "5.2`", ",", "5.6`", ",", "5.9`", ",", "5.3`", ",", "5.5`", ",", 
       "5.1`", ",", "6.2`", ",", "5.4`", ",", "5.9`", ",", "5.6`", ",", 
       "5.2`", ",", "5.`", ",", "5.7`", ",", "5.4`", ",", "5.7`", ",", "4.9`",
        ",", "4.9`", ",", "5.3`", ",", "5.4`", ",", "5.5`", ",", "5.1`", ",", 
       "5.8`", ",", "5.6`", ",", "5.5`", ",", "5.4`", ",", "5.8`", ",", 
       "5.8`", ",", "5.6`", ",", "5.1`", ",", "6.6`", ",", "6.4`", ",", "5.`",
        ",", "5.5`", ",", "5.5`", ",", "5.5`", ",", "4.5`", ",", "5.4`", ",", 
       "5.3`", ",", "5.5`", ",", "5.4`", ",", "5.7`", ",", "5.8`", ",", 
       "5.4`", ",", "5.3`", ",", "6.1`", ",", "5.8`", ",", "5.7`", ",", 
       "5.5`", ",", "5.6`", ",", "5.5`", ",", "5.7`", ",", "5.1`", ",", 
       "6.3`", ",", "5.4`", ",", "5.6`", ",", "5.6`", ",", "5.4`", ",", 
       "5.4`", ",", "5.5`", ",", "5.5`", ",", "5.3`", ",", "5.4`", ",", 
       "5.7`", ",", "5.3`", ",", "5.7`", ",", "5.4`", ",", "5.`", ",", "5.3`",
        ",", "5.5`", ",", "5.`", ",", "5.1`", ",", "5.3`", ",", "5.7`", ",", 
       "5.7`", ",", "6.3`", ",", "5.4`", ",", "4.3`", ",", "5.2`", ",", 
       "5.4`", ",", "6.6`", ",", "5.4`", ",", "5.5`", ",", "5.3`", ",", 
       "4.8`", ",", "5.2`", ",", "5.`", ",", "5.4`", ",", "6.1`", ",", "4.9`",
        ",", "6.1`", ",", "5.`", ",", "5.4`", ",", "5.8`", ",", "5.3`", ",", 
       "5.7`", ",", "6.`", ",", "5.3`", ",", "5.2`", ",", "5.3`", ",", "5.5`",
        ",", "5.7`", ",", "5.1`", ",", "6.`", ",", "5.3`", ",", "4.9`", ",", 
       "5.9`", ",", "5.4`", ",", "5.5`", ",", "4.9`", ",", "5.6`", ",", 
       "4.8`", ",", "5.3`", ",", "5.7`", ",", "5.4`", ",", "5.5`", ",", 
       "5.3`", ",", "5.2`", ",", "5.8`", ",", "5.`", ",", "5.1`", ",", "5.9`",
        ",", "5.1`", ",", "5.8`", ",", "4.6`", ",", "5.4`", ",", "5.5`", ",", 
       "5.7`", ",", "5.4`", ",", "5.3`", ",", "5.8`", ",", "5.6`", ",", 
       "5.2`", ",", "5.5`", ",", "5.5`", ",", "5.9`", ",", "5.6`", ",", 
       "5.3`", ",", "5.7`", ",", "6.1`", ",", "5.7`", ",", "5.6`", ",", 
       "5.4`", ",", "6.2`", ",", "5.2`", ",", "5.3`", ",", "5.6`", ",", 
       "5.4`", ",", "5.3`", ",", "5.9`", ",", "5.`", ",", "5.7`", ",", "5.3`",
        ",", "5.3`", ",", "5.7`", ",", "5.4`", ",", "5.4`", ",", "4.2`", ",", 
       "5.5`", ",", "5.4`", ",", "4.8`", ",", "5.3`", ",", "5.3`", ",", "5.`",
        ",", "5.2`", ",", "5.9`", ",", "6.1`", ",", "5.5`", ",", "5.7`", ",", 
       "5.1`", ",", "5.5`", ",", "5.2`", ",", "5.7`", ",", "5.2`", ",", 
       "5.8`", ",", "6.1`", ",", "4.7`", ",", "6.1`", ",", "5.5`", ",", 
       "5.3`", ",", "5.1`", ",", "6.2`", ",", "6.`", ",", "5.6`", ",", "5.2`",
        ",", "5.1`", ",", "5.4`", ",", "5.7`", ",", "5.7`", ",", "5.2`", ",", 
       "5.9`", ",", "5.4`", ",", "5.8`", ",", "5.5`", ",", "5.3`", ",", 
       "5.8`", ",", "5.2`", ",", "4.9`", ",", "5.6`", ",", "5.1`", ",", 
       "4.8`", ",", "5.8`", ",", "5.3`", ",", "5.1`", ",", "6.`", ",", "5.2`",
        ",", "4.8`", ",", "5.9`", ",", "5.2`", ",", "5.4`", ",", "5.7`", ",", 
       "5.3`", ",", "5.6`", ",", "5.`", ",", "4.7`", ",", "5.1`", ",", "5.4`",
        ",", "5.8`", ",", "5.4`", ",", "5.1`", ",", "5.8`", ",", "5.3`", ",", 
       "5.2`", ",", "5.9`", ",", "5.2`", ",", "5.8`", ",", "5.2`", ",", "5.`",
        ",", "5.4`", ",", "5.9`", ",", "5.7`", ",", "5.4`", ",", "5.8`", ",", 
       "4.9`", ",", "5.8`", ",", "5.5`", ",", "6.1`", ",", "5.4`", ",", 
       "5.9`", ",", "5.6`", ",", "5.5`", ",", "4.7`", ",", "5.6`", ",", 
       "4.8`", ",", "5.1`", ",", "5.6`", ",", "5.5`", ",", "5.4`", ",", 
       "6.6`", ",", "5.4`", ",", "5.2`", ",", "5.8`", ",", "5.7`", ",", 
       "5.6`", ",", "5.9`", ",", "5.5`", ",", "5.4`", ",", "5.2`", ",", "6.`",
        ",", "5.5`", ",", "4.7`", ",", "5.3`", ",", "5.2`", ",", "5.9`", ",", 
       "5.4`", ",", "5.6`", ",", "4.9`", ",", "5.1`", ",", "5.9`", ",", "5.`",
        ",", "5.6`", ",", "5.3`", ",", "6.`", ",", "5.4`", ",", "5.5`", ",", 
       "5.2`", ",", "5.5`", ",", "5.7`", ",", "5.3`", ",", "5.9`", ",", 
       "5.7`", ",", "5.2`", ",", "5.5`", ",", "5.9`", ",", "5.2`", ",", 
       "5.8`", ",", "5.`", ",", "5.6`", ",", "5.6`", ",", "5.8`", ",", "5.5`",
        ",", "5.3`", ",", "4.9`", ",", "5.8`", ",", "5.8`", ",", "5.1`", ",", 
       "6.4`", ",", "4.6`", ",", "6.`", ",", "5.6`", ",", "5.3`", ",", "6.`", 
       ",", "5.7`", ",", "5.1`", ",", "5.4`", ",", "5.1`", ",", "5.1`", ",", 
       "4.8`", ",", "5.3`", ",", "5.6`", ",", "5.7`", ",", "6.3`", ",", 
       "5.7`", ",", "5.2`", ",", "5.8`", ",", "5.5`", ",", "5.`", ",", "5.4`",
        ",", "5.5`", ",", "6.`", ",", "5.4`", ",", "5.5`", ",", "4.9`", ",", 
       "5.3`", ",", "5.5`", ",", "5.1`", ",", "5.3`", ",", "5.2`", ",", 
       "4.9`", ",", "5.1`", ",", "5.4`", ",", "5.3`", ",", "5.5`", ",", 
       "5.4`", ",", "5.3`", ",", "5.4`", ",", "5.5`", ",", "5.7`", ",", "6.`",
        ",", "5.5`", ",", "5.4`", ",", "5.7`", ",", "4.8`", ",", "5.8`", ",", 
       "5.9`", ",", "5.6`", ",", "5.2`", ",", "5.4`", ",", "5.4`", ",", 
       "5.6`", ",", "5.8`", ",", "5.5`", ",", "5.3`", ",", "5.8`", ",", 
       "5.5`", ",", "5.4`", ",", "5.5`", ",", "5.7`", ",", "5.2`", ",", 
       "5.9`", ",", "5.4`", ",", "5.6`", ",", "5.8`", ",", "5.7`", ",", 
       "5.5`", ",", "5.2`", ",", "6.1`", ",", "5.2`", ",", "6.`", ",", "5.8`",
        ",", "5.8`", ",", "5.3`", ",", "5.3`", ",", "5.`", ",", "5.2`", ",", 
       "5.9`", ",", "5.4`", ",", "5.2`", ",", "5.8`", ",", "5.2`", ",", 
       "5.2`", ",", "6.6`", ",", "5.5`", ",", "5.6`", ",", "5.4`", ",", 
       "5.6`", ",", "5.4`", ",", "5.5`", ",", "6.1`", ",", "5.2`", ",", 
       "5.8`", ",", "5.3`", ",", "6.3`", ",", "5.5`", ",", "5.1`", ",", 
       "5.8`", ",", "5.8`", ",", "5.7`", ",", "5.1`", ",", "5.3`", ",", "6.`",
        ",", "5.9`", ",", "5.3`", ",", "6.`", ",", "5.2`", ",", "5.5`", ",", 
       "5.6`", ",", "5.4`", ",", "5.3`", ",", "5.9`", ",", "6.`", ",", "5.3`",
        ",", "5.8`", ",", "5.6`", ",", "5.3`", ",", "5.3`", ",", "5.6`", ",", 
       "5.7`", ",", "5.6`", ",", "5.2`", ",", "5.4`", ",", "5.2`", ",", "6.`",
        ",", "5.4`", ",", "5.6`", ",", "6.2`", ",", "5.5`", ",", "5.5`", ",", 
       "5.4`", ",", "6.`", ",", "4.9`", ",", "5.7`", ",", "5.3`", ",", "5.7`",
        ",", "5.3`", ",", "5.3`", ",", "5.4`", ",", "5.1`", ",", "5.7`", ",", 
       "5.4`", ",", "5.4`", ",", "5.5`", ",", "5.3`", ",", "5.9`", ",", 
       "5.1`", ",", "5.2`", ",", "5.6`", ",", "5.2`", ",", "5.7`", ",", 
       "5.7`", ",", "4.8`", ",", "6.`", ",", "5.4`", ",", "5.6`", ",", "5.5`",
        ",", "5.2`", ",", "5.5`", ",", "5.6`", ",", "4.8`", ",", "5.3`", ",", 
       "5.6`", ",", "5.6`", ",", "6.1`", ",", "5.4`", ",", "6.2`", ",", 
       "5.1`", ",", "5.1`", ",", "5.2`", ",", "5.8`", ",", "5.3`", ",", 
       "6.7`", ",", "5.5`", ",", "5.5`", ",", "5.6`", ",", "6.1`", ",", 
       "5.2`", ",", "6.`", ",", "5.4`", ",", "5.3`", ",", "5.9`", ",", "6.4`",
        ",", "5.1`", ",", "5.`", ",", "5.6`", ",", "5.9`", ",", "5.3`", ",", 
       "5.6`", ",", "5.8`", ",", "4.6`", ",", "5.2`", ",", "5.5`", ",", 
       "5.4`", ",", "5.1`", ",", "5.7`", ",", "6.`", ",", "5.7`", ",", "5.4`",
        ",", "5.3`", ",", "5.8`", ",", "5.3`", ",", "5.9`", ",", "5.9`", ",", 
       "5.8`", ",", "5.8`", ",", "5.8`", ",", "5.8`", ",", "6.1`", ",", 
       "5.9`", ",", "5.2`", ",", "5.5`", ",", "4.3`", ",", "5.5`", ",", 
       "4.8`", ",", "5.4`", ",", "5.9`", ",", "5.2`", ",", "6.3`", ",", "6.`",
        ",", "5.8`", ",", "4.9`", ",", "5.1`", ",", "6.`", ",", "5.1`", ",", 
       "5.3`", ",", "5.2`", ",", "5.5`", ",", "5.7`", ",", "5.7`", ",", 
       "5.4`", ",", "5.7`", ",", "5.4`", ",", "5.6`", ",", "5.8`", ",", 
       "5.4`", ",", "5.5`", ",", "5.1`", ",", "5.2`", ",", "5.4`", ",", 
       "5.7`", ",", "5.1`", ",", "5.4`", ",", "5.2`", ",", "5.6`", ",", 
       "5.5`", ",", "5.7`", ",", "4.6`", ",", "6.5`", ",", "5.5`", ",", 
       "5.5`", ",", "5.8`", ",", "5.6`", ",", "5.4`", ",", "5.6`", ",", 
       "5.2`", ",", "6.`", ",", "6.7`", ",", "6.`", ",", "4.8`", ",", "5.5`", 
       ",", "5.5`", ",", "5.6`", ",", "5.7`", ",", "5.9`", ",", "5.`", ",", 
       "5.7`", ",", "5.5`", ",", "4.8`", ",", "6.1`", ",", "5.7`", ",", 
       "5.9`", ",", "5.6`", ",", "5.3`", ",", "5.8`", ",", "5.7`", ",", 
       "5.5`", ",", "5.5`", ",", "5.5`", ",", "5.4`", ",", "4.5`", ",", 
       "5.5`", ",", "5.5`", ",", "5.3`", ",", "6.`", ",", "5.2`", ",", "5.1`",
        ",", "6.3`", ",", "5.3`", ",", "6.1`", ",", "5.9`", ",", "5.`", ",", 
       "5.5`", ",", "5.2`", ",", "5.6`", ",", "5.`", ",", "5.8`", ",", "6.2`",
        ",", "4.7`", ",", "5.2`", ",", "5.4`", ",", "5.7`", ",", "5.9`", ",", 
       "6.1`", ",", "5.6`", ",", "5.8`", ",", "6.`", ",", "4.9`", ",", "5.8`",
        ",", "5.7`", ",", "5.2`", ",", "5.3`", ",", "5.7`", ",", "5.4`", ",", 
       "5.4`", ",", "5.4`", ",", "5.9`", ",", "6.4`", ",", "5.5`", ",", 
       "5.1`", ",", "5.4`", ",", "5.7`", ",", "5.2`", ",", "5.3`", ",", 
       "5.7`", ",", "5.4`", ",", "5.3`", ",", "5.5`", ",", "5.7`", ",", 
       "6.3`", ",", "5.5`", ",", "6.2`", ",", "5.3`", ",", "4.9`", ",", 
       "5.6`", ",", "5.`", ",", "5.9`", ",", "6.3`", ",", "5.1`", ",", "5.7`",
        ",", "5.4`", ",", "5.2`", ",", "5.1`", ",", "5.6`", ",", "4.8`", ",", 
       "6.`", ",", "6.`", ",", "5.6`", ",", "5.1`", ",", "5.5`", ",", "5.7`", 
       ",", "5.3`", ",", "5.5`", ",", "5.7`", ",", "5.9`", ",", "4.8`", ",", 
       "5.9`", ",", "5.`", ",", "5.8`", ",", "5.6`", ",", "5.5`", ",", "5.9`",
        ",", "5.`", ",", "5.1`", ",", "5.5`", ",", "5.8`", ",", "5.6`", ",", 
       "5.7`", ",", "5.6`", ",", "5.4`", ",", "5.7`", ",", "5.7`", ",", 
       "5.7`", ",", "5.9`", ",", "5.8`", ",", "5.2`", ",", "5.8`", ",", 
       "5.4`", ",", "5.5`", ",", "5.4`", ",", "5.4`", ",", "5.3`", ",", 
       "5.2`", ",", "5.1`", ",", "5.6`", ",", "5.8`", ",", "5.6`", ",", 
       "5.3`", ",", "5.4`", ",", "5.6`", ",", "5.7`", ",", "6.2`", ",", 
       "5.6`", ",", "5.3`", ",", "5.7`", ",", "5.1`", ",", "5.9`", ",", 
       "4.8`", ",", "5.6`", ",", "5.4`", ",", "5.4`", ",", "5.7`", ",", 
       "5.3`", ",", "5.8`", ",", "5.6`", ",", "4.7`", ",", "5.4`", ",", 
       "6.1`", ",", "6.`", ",", "4.9`", ",", "6.6`", ",", "5.3`", ",", "5.9`",
        ",", "5.9`", ",", "5.4`", ",", "5.7`", ",", "5.2`", ",", "5.4`", ",", 
       "5.3`", ",", "5.6`", ",", "5.4`", ",", "5.4`", ",", "5.4`", ",", 
       "5.4`", ",", "5.3`", ",", "5.7`", ",", "5.2`", ",", "5.5`", ",", 
       "5.7`", ",", "5.5`", ",", "5.5`", ",", "5.7`", ",", "5.2`", ",", 
       "5.6`", ",", "5.7`", ",", "5.4`", ",", "5.7`", ",", "5.8`", ",", 
       "5.5`", ",", "5.8`", ",", "5.4`", ",", "4.9`", ",", "5.3`", ",", 
       "5.3`", ",", "5.6`", ",", "4.4`", ",", "5.4`", ",", "5.1`", ",", 
       "5.9`", ",", "5.3`", ",", "5.`", ",", "5.3`", ",", "5.7`", ",", "5.2`",
        ",", "5.7`", ",", "5.6`", ",", "6.2`", ",", "5.5`", ",", "5.6`", ",", 
       "5.4`", ",", "4.7`", ",", "5.2`", ",", "5.6`", ",", "6.1`", ",", 
       "6.1`", ",", "6.`", ",", "6.1`", ",", "6.`", ",", "5.2`", ",", "5.5`", 
       ",", "5.4`", ",", "5.4`", ",", "5.2`", ",", "5.7`", ",", "5.2`", ",", 
       "6.`", ",", "5.4`", ",", "4.9`", ",", "5.3`", ",", "5.8`", ",", "5.7`",
        ",", "5.2`", ",", "6.1`", ",", "5.2`", ",", "6.2`", ",", "5.5`", ",", 
       "5.7`", ",", "6.2`", ",", "5.7`", ",", "5.6`", ",", "5.5`", ",", "6.`",
        ",", "6.4`", ",", "5.3`", ",", "5.9`", ",", "5.3`", ",", "5.4`", ",", 
       "5.6`", ",", "5.7`", ",", "5.7`", ",", "5.1`", ",", "5.6`", ",", 
       "6.1`", ",", "5.5`", ",", "5.6`", ",", "5.6`", ",", "4.7`", ",", 
       "5.5`", ",", "6.`", ",", "5.1`", ",", "4.9`", ",", "6.`", ",", "5.5`", 
       ",", "5.6`", ",", "5.7`", ",", "5.4`", ",", "5.6`", ",", "5.6`", ",", 
       "5.1`", ",", "5.2`", ",", "5.7`", ",", "5.3`", ",", "6.`", ",", "6.3`",
        ",", "5.3`", ",", "5.5`", ",", "4.9`", ",", "5.5`", ",", "5.5`", ",", 
       "5.6`", ",", "5.3`", ",", "5.8`", ",", "6.`", ",", "6.1`", ",", "5.4`",
        ",", "5.4`", ",", "6.`", ",", "5.5`", ",", "5.5`", ",", "5.4`", ",", 
       "5.2`", ",", "5.7`", ",", "5.5`", ",", "5.7`", ",", "5.6`", ",", 
       "5.6`", ",", "5.`", ",", "5.8`", ",", "5.1`", ",", "5.7`", ",", "6.3`",
        ",", "5.6`", ",", "5.5`", ",", "5.5`", ",", "5.6`", ",", "5.6`", ",", 
       "5.4`", ",", "5.3`", ",", "5.4`", ",", "5.7`", ",", "5.4`", ",", "6.`",
        ",", "5.5`", ",", "5.3`", ",", "5.2`", ",", "5.5`", ",", "5.8`", ",", 
       "5.2`", ",", "5.5`", ",", "5.6`", ",", "5.5`", ",", "6.1`", ",", 
       "5.5`", ",", "5.4`", ",", "5.2`", ",", "5.6`", ",", "5.8`", ",", 
       "6.2`", ",", "5.3`", ",", "5.2`", ",", "5.4`", ",", "5.2`", ",", 
       "5.1`", ",", "5.8`", ",", "5.3`", ",", "6.1`", ",", "5.6`", ",", 
       "5.4`", ",", "5.9`", ",", "5.3`", ",", "5.4`", ",", "5.6`", ",", 
       "5.5`", ",", "5.6`", ",", "5.5`", ",", "6.`", ",", "5.4`", ",", "5.4`",
        ",", "5.7`", ",", "5.4`", ",", "4.7`", ",", "5.2`", ",", "5.9`", ",", 
       "5.6`", ",", "5.8`", ",", "5.6`", ",", "5.4`", ",", "4.8`", ",", 
       "5.9`", ",", "5.9`", ",", "6.`", ",", "4.9`", ",", "5.8`", ",", "6.`", 
       ",", "5.`", ",", "5.2`", ",", "5.6`", ",", "6.`", ",", "6.4`", ",", 
       "5.7`", ",", "5.6`", ",", "5.3`", ",", "6.`", ",", "5.6`", ",", "4.9`",
        ",", "5.7`", ",", "5.2`", ",", "5.8`", ",", "5.4`", ",", "5.2`", ",", 
       "5.6`", ",", "5.3`", ",", "6.`", ",", "5.6`", ",", "5.6`", ",", "5.8`",
        ",", "5.`", ",", "5.8`", ",", "6.2`", ",", "5.9`", ",", "5.6`", ",", 
       "5.8`", ",", "5.6`", ",", "5.1`", ",", "5.3`", ",", "5.6`", ",", 
       "5.1`", ",", "5.4`", ",", "6.`", ",", "4.6`", ",", "5.5`", ",", "5.7`",
        ",", "5.4`", ",", "5.3`", ",", "5.2`", ",", "5.5`", ",", "5.4`", ",", 
       "5.3`", ",", "6.`", ",", "5.9`", ",", "5.3`", ",", "6.`", ",", "5.5`", 
       ",", "5.8`", ",", "5.3`", ",", "5.5`", ",", "5.9`", ",", "5.4`", ",", 
       "5.6`", ",", "5.5`", ",", "5.3`", ",", "5.2`", ",", "5.4`", ",", 
       "5.1`", ",", "5.6`", ",", "6.4`", ",", "5.7`", ",", "5.4`", ",", 
       "5.5`", ",", "5.9`", ",", "5.2`", ",", "5.5`", ",", "5.6`", ",", 
       "5.8`", ",", "5.1`", ",", "5.4`", ",", "5.8`", ",", "5.5`", ",", 
       "5.2`", ",", "5.4`", ",", "4.9`", ",", "6.1`", ",", "5.8`", ",", 
       "5.8`", ",", "5.3`", ",", "4.4`", ",", "5.6`", ",", "5.4`", ",", 
       "5.8`", ",", "5.6`", ",", "4.5`", ",", "5.6`", ",", "5.4`", ",", 
       "5.9`", ",", "4.8`", ",", "5.1`", ",", "5.5`", ",", "5.2`", ",", 
       "5.2`", ",", "5.2`", ",", "5.5`", ",", "5.7`", ",", "5.`", ",", "5.6`",
        ",", "5.6`", ",", "4.8`", ",", "5.7`", ",", "5.9`", ",", "5.7`", ",", 
       "6.1`", ",", "5.6`", ",", "5.7`", ",", "6.`", ",", "5.8`", ",", "5.5`",
        ",", "5.5`", ",", "6.`", ",", "4.9`", ",", "5.5`", ",", "5.4`", ",", 
       "5.2`", ",", "5.8`", ",", "5.6`", ",", "5.2`", ",", "5.`"}], "}"}]}], 
    ";"}]}]}]], "Input",
 CellOpen->False,
 InitializationCell->True,
 CellChangeTimes->{{3.8896912300950117`*^9, 3.8896912309170127`*^9}, {
   3.8896912644171963`*^9, 3.889691275348404*^9}, {3.889691384719347*^9, 
   3.889691385299331*^9}, {3.889691510508988*^9, 3.8896915110202837`*^9}, 
   3.8896916263257585`*^9, {3.889691692992158*^9, 3.889691759543519*^9}, {
   3.8896918535053406`*^9, 3.8896919294223843`*^9}, {3.889692009774741*^9, 
   3.8896920414623795`*^9}, {3.889692116008479*^9, 3.889692124616123*^9}, {
   3.889692174279664*^9, 3.889692182401597*^9}, {3.8896922845267224`*^9, 
   3.8896922908861012`*^9}, {3.889692326913212*^9, 3.8896923776511908`*^9}, {
   3.8896924139083104`*^9, 3.8896924307604356`*^9}, {3.889692461437233*^9, 
   3.8896924895550733`*^9}, {3.889692526749594*^9, 3.8896925684657803`*^9}, {
   3.889692712977454*^9, 3.8896927511035037`*^9}, {3.8896928192329493`*^9, 
   3.8896928227122307`*^9}, {3.889700209937976*^9, 3.889700210372732*^9}, {
   3.8897002418491564`*^9, 3.8897002419541726`*^9}, {3.889700285491633*^9, 
   3.8897002855403957`*^9}, {3.8897003224902563`*^9, 3.889700340149122*^9}, {
   3.889700370781087*^9, 3.8897003708708663`*^9}, {3.8897004018607283`*^9, 
   3.8897004099883013`*^9}, {3.8897004671938066`*^9, 
   3.8897004821961184`*^9}, {3.889700522991865*^9, 3.88970062748174*^9}, {
   3.8897009910483108`*^9, 3.889701002398205*^9}, {3.8897010370102205`*^9, 
   3.8897011049474573`*^9}, {3.8897013581831417`*^9, 3.889701385355407*^9}, {
   3.8897015141566186`*^9, 3.8897015359583955`*^9}, {3.8897015667677298`*^9, 
   3.889701620572036*^9}, {3.8897018078934274`*^9, 3.889701811037859*^9}, {
   3.88970184643062*^9, 3.889701928701212*^9}, {3.8897020361492214`*^9, 
   3.889702043166401*^9}, {3.8897020774255514`*^9, 3.8897021790369864`*^9}, {
   3.8897023878844843`*^9, 3.8897023883730063`*^9}, 3.8897024521667433`*^9, {
   3.889702508731061*^9, 3.8897025308598604`*^9}, {3.889702636917552*^9, 
   3.8897026977170296`*^9}, {3.889702834904545*^9, 3.8897028467597723`*^9}, {
   3.8897029520071697`*^9, 3.8897029652542505`*^9}, {3.8897030053445635`*^9, 
   3.889703014798775*^9}, {3.88970306231037*^9, 3.8897031169717307`*^9}, {
   3.889703166412823*^9, 3.8897031831192627`*^9}, {3.8897035552053347`*^9, 
   3.889703564261608*^9}, {3.8897036025117507`*^9, 3.8897036616058135`*^9}, {
   3.889703731559654*^9, 3.889703771361638*^9}, 3.8897039122876444`*^9, 
   3.889703974332379*^9, 3.8897041234312496`*^9, {3.889704216342126*^9, 
   3.8897042318064814`*^9}, {3.889704272732483*^9, 3.8897043006773767`*^9}, {
   3.889704338411845*^9, 3.8897043780536184`*^9}, {3.8897045261640096`*^9, 
   3.889704528150749*^9}, {3.889704752009115*^9, 3.8897047840627985`*^9}, 
   3.889718500390573*^9, {3.8897553019979787`*^9, 3.8897553049092607`*^9}, {
   3.889755363040413*^9, 3.88975547597777*^9}, {3.8897555349966183`*^9, 
   3.889755544148963*^9}, {3.889755822714609*^9, 3.889755855256488*^9}, {
   3.8897558868832817`*^9, 3.889755889356164*^9}, {3.889756128868998*^9, 
   3.8897562292208633`*^9}, {3.889756264410037*^9, 3.8897563223833575`*^9}, {
   3.8897563705418653`*^9, 3.889756555757388*^9}, {3.8897566010667305`*^9, 
   3.889756640889343*^9}, {3.889756672416984*^9, 3.8897567831133327`*^9}, {
   3.889756816955671*^9, 3.889756942535432*^9}, {3.889756994674218*^9, 
   3.88975702237695*^9}, {3.889757123561772*^9, 3.889757184495801*^9}, {
   3.8897572146006036`*^9, 3.8897572149922876`*^9}, {3.889757262566334*^9, 
   3.889757307094088*^9}, {3.8897573761310587`*^9, 3.889757421176505*^9}, {
   3.889757568965083*^9, 3.8897577948959427`*^9}, {3.8897578547782335`*^9, 
   3.889758141837471*^9}, {3.8897583580108695`*^9, 3.8897583580207396`*^9}, {
   3.8897584174217978`*^9, 3.8897584250274982`*^9}, {3.8897585700623846`*^9, 
   3.8897586039090853`*^9}, {3.8897588360421505`*^9, 3.889758985540641*^9}, {
   3.8897590233307657`*^9, 3.88975902759506*^9}, {3.889759319527895*^9, 
   3.8897593301448536`*^9}, 3.8897594372404995`*^9, {3.8897600790254354`*^9, 
   3.8897601154032736`*^9}, {3.8897601683127885`*^9, 3.889760219806176*^9}, 
   3.8897726541319904`*^9, {3.889772722551182*^9, 3.889772736789359*^9}, {
   3.889773100305376*^9, 3.889773147261458*^9}, {3.8897731835118775`*^9, 
   3.8897732428052845`*^9}, {3.8897732810869274`*^9, 
   3.8897733253907566`*^9}, {3.889773368947553*^9, 3.8897733866925907`*^9}, {
   3.8897734169097185`*^9, 3.8897735423707256`*^9}, {3.889774988554056*^9, 
   3.8897750258822002`*^9}, {3.8897750629910545`*^9, 
   3.8897751895069537`*^9}, {3.8897752424156914`*^9, 
   3.8897752928806725`*^9}, {3.8897753229760847`*^9, 
   3.8897754848735075`*^9}, {3.889775694455429*^9, 3.889775697702176*^9}, {
   3.889775729569607*^9, 3.889775807835455*^9}, {3.8897758457945824`*^9, 
   3.8897758841394687`*^9}, {3.8897760478296013`*^9, 
   3.8897760505666904`*^9}, {3.8897761306079435`*^9, 3.889776152156747*^9}, {
   3.8897762198482766`*^9, 3.889776394585517*^9}, 3.8897764347194176`*^9, {
   3.8897764650497*^9, 3.889776486780905*^9}, {3.88977653889336*^9, 
   3.889776600883237*^9}, {3.889776797708661*^9, 3.889776801572073*^9}, {
   3.8897769269564323`*^9, 3.8897769361947017`*^9}, {3.889777006765012*^9, 
   3.8897770092133565`*^9}, {3.8897825371115665`*^9, 3.889782590698821*^9}, {
   3.889782645093025*^9, 3.889782871174548*^9}, 3.889782924739421*^9, {
   3.8897829910540843`*^9, 3.8897830342006435`*^9}, {3.8897832296914816`*^9, 
   3.88978329507975*^9}, {3.8897833426529827`*^9, 3.8897833684738655`*^9}, {
   3.889783420029663*^9, 3.889783440772187*^9}, {3.88978352512144*^9, 
   3.8897835824789343`*^9}, {3.889783704748794*^9, 3.889783706024093*^9}, {
   3.8897837713851957`*^9, 3.8897838062045493`*^9}, {3.8897858210424633`*^9, 
   3.8897859311808853`*^9}, {3.889785973956227*^9, 3.889786083668623*^9}, {
   3.889786113901514*^9, 3.8897861347640553`*^9}, {3.889786269302322*^9, 
   3.8897863294906206`*^9}, 3.8897863618842573`*^9, {3.889786404614559*^9, 
   3.8897864049714246`*^9}, {3.88978654002345*^9, 3.889786570500288*^9}, {
   3.8897866143989534`*^9, 3.8897867319709635`*^9}, {3.889787187978681*^9, 
   3.8897873101036434`*^9}, {3.889787346033511*^9, 3.889787363934842*^9}, {
   3.889787446257811*^9, 3.8897874489478793`*^9}, {3.889787484841359*^9, 
   3.8897875142687883`*^9}, {3.88978760919054*^9, 3.8897876763676877`*^9}, {
   3.8897877790046835`*^9, 3.8897878054617968`*^9}, {3.8897880114942017`*^9, 
   3.8897882501581097`*^9}, {3.88978835559223*^9, 3.8897883650068073`*^9}, {
   3.8897883986087713`*^9, 3.889788481000231*^9}, {3.889788520061062*^9, 
   3.889788556789907*^9}, {3.8897886344087753`*^9, 3.8897886344261894`*^9}, {
   3.8897886765792027`*^9, 3.889788677741959*^9}, {3.8897887426225915`*^9, 
   3.8897887426317453`*^9}, {3.889788773153924*^9, 3.889788774743102*^9}, {
   3.889788887385439*^9, 3.8897889744728203`*^9}, 3.889789105418852*^9, 
   3.8897891618162174`*^9, {3.8898358152711625`*^9, 3.8898358269090843`*^9}, {
   3.8898382087054777`*^9, 3.889838212123062*^9}, {3.889838557543846*^9, 
   3.8898385588090816`*^9}, {3.889838842465629*^9, 3.88983884740174*^9}, {
   3.889838897947144*^9, 3.889838898135929*^9}, {3.8898392657458105`*^9, 
   3.8898392766518183`*^9}, {3.8898393376553946`*^9, 
   3.8898393424651175`*^9}, {3.8898394803288527`*^9, 3.8898394830979633`*^9}, 
   3.889839527401271*^9, {3.8898395630500607`*^9, 3.8898395685224657`*^9}, {
   3.88983963591481*^9, 3.8898396554680243`*^9}, {3.8898537932007236`*^9, 
   3.889853799768511*^9}, {3.8898538327995815`*^9, 3.889853839854379*^9}, {
   3.8898539290781097`*^9, 3.889853962489457*^9}, 3.8898540212396355`*^9, {
   3.8898540906092415`*^9, 3.889854109430912*^9}, {3.8898541461351466`*^9, 
   3.8898541894990997`*^9}, {3.889854256837947*^9, 3.889854257967585*^9}, {
   3.889854375024248*^9, 3.8898544031682367`*^9}, {3.889854435006363*^9, 
   3.8898544556486464`*^9}, {3.8898545032948637`*^9, 
   3.8898545270523643`*^9}, {3.8898545578970532`*^9, 3.88985465376828*^9}, {
   3.8898547121440506`*^9, 3.8898547158364797`*^9}, {3.8898547558090935`*^9, 
   3.889854829566084*^9}, {3.889854890615178*^9, 3.889854903051834*^9}, {
   3.889877190744092*^9, 3.8898772324038506`*^9}, {3.8898772772373505`*^9, 
   3.889877304028323*^9}, {3.8898774131802835`*^9, 3.889877438895326*^9}, {
   3.889877476300942*^9, 3.8898774840486917`*^9}, {3.889877532922223*^9, 
   3.8898775383325253`*^9}, 3.889877570284927*^9, {3.889877701732623*^9, 
   3.889877728168137*^9}, {3.8898777609672203`*^9, 3.8898777615526457`*^9}, 
   3.889877940828323*^9, {3.889878190116458*^9, 3.8898782049965096`*^9}, {
   3.8898782391070476`*^9, 3.889878350945322*^9}, {3.889878404992752*^9, 
   3.889878480079229*^9}, 3.8898785297977824`*^9, {3.889878699439749*^9, 
   3.8898787087451644`*^9}, 3.8898787400407753`*^9, 3.8898787703356953`*^9, {
   3.8898788242811537`*^9, 3.8898788295972424`*^9}, {3.889878868170416*^9, 
   3.889878887957863*^9}, {3.889878921302479*^9, 3.8898789884301376`*^9}, {
   3.8898802058568063`*^9, 3.8898802110881476`*^9}, {3.88988026484445*^9, 
   3.8898802729483852`*^9}, 3.889880339665509*^9, {3.889880416105362*^9, 
   3.8898804166087956`*^9}, 3.8898805173449287`*^9, 3.889880573066001*^9, 
   3.8898806084053326`*^9, 3.88988093104958*^9, {3.8898809692918844`*^9, 
   3.8898810400906467`*^9}, {3.8898811119038734`*^9, 3.8898811184367514`*^9}, 
   3.8898811754338865`*^9, {3.8898812306640153`*^9, 3.889881242929548*^9}, {
   3.88988133767004*^9, 3.889881343930313*^9}, {3.8898813806595173`*^9, 
   3.8898814748580713`*^9}, {3.8898818104556446`*^9, 
   3.8898818972295184`*^9}, {3.8898819668760986`*^9, 3.889881981434884*^9}, 
   3.889882039539763*^9, {3.8898826197963514`*^9, 3.8898827143278637`*^9}, {
   3.8898828528572636`*^9, 3.8898828857546816`*^9}, {3.889882938490373*^9, 
   3.8898830339793825`*^9}, {3.889884568662348*^9, 3.889884683800459*^9}, {
   3.8898847152661924`*^9, 3.8898847257224636`*^9}, {3.8898849633703194`*^9, 
   3.889884982935279*^9}, {3.8898850637008476`*^9, 3.8898851215887527`*^9}, {
   3.8898852677485075`*^9, 3.889885301167673*^9}, 3.889885349982408*^9, {
   3.889922632547546*^9, 3.8899227785545893`*^9}, {3.8899228202619233`*^9, 
   3.8899229434930162`*^9}, {3.8899229873666706`*^9, 
   3.8899230384820857`*^9}, {3.889923099565895*^9, 3.889923127269273*^9}, {
   3.889923157998454*^9, 3.889923271191058*^9}, {3.8899233105654163`*^9, 
   3.889923509332959*^9}, 3.8899236422169685`*^9, {3.889923718023656*^9, 
   3.889923760797926*^9}, {3.8899237940161114`*^9, 3.8899238057549467`*^9}, {
   3.8899239063329396`*^9, 3.8899239698129015`*^9}, 3.889924044259483*^9, {
   3.8899241835490675`*^9, 3.8899241941801505`*^9}, {3.889925571720739*^9, 
   3.8899257128154926`*^9}, {3.889925776384*^9, 3.889926052994116*^9}, {
   3.889926170061244*^9, 3.8899262057022514`*^9}, {3.8899264242144775`*^9, 
   3.8899264624346075`*^9}, {3.8899265029557257`*^9, 3.889926593371525*^9}, {
   3.8899266730955977`*^9, 3.889926826280016*^9}, 3.8899273357753086`*^9, 
   3.8899274148561897`*^9, {3.889927781430413*^9, 3.8899277925985427`*^9}, 
   3.8899280088736477`*^9, 3.889928176992278*^9, {3.889928238897959*^9, 
   3.8899282404278717`*^9}, {3.889941012509778*^9, 3.88994111409054*^9}, {
   3.889941149139553*^9, 3.8899416264257717`*^9}, {3.8899416884964905`*^9, 
   3.8899418226688476`*^9}, {3.889941879585762*^9, 3.889941962022326*^9}, {
   3.889942032567031*^9, 3.88994212197226*^9}, {3.889942657228281*^9, 
   3.889942658926437*^9}, {3.889942856793662*^9, 3.889942862292117*^9}, {
   3.889943874807826*^9, 3.889943880848263*^9}, {3.8899439950744677`*^9, 
   3.8899440147454643`*^9}, {3.8899442037866087`*^9, 3.889944204274414*^9}, {
   3.8899442354845514`*^9, 3.8899442674761877`*^9}, {3.8899443619419985`*^9, 
   3.8899443903770905`*^9}, {3.88994448147441*^9, 3.8899444842894535`*^9}, {
   3.8899445170317326`*^9, 3.8899445216539426`*^9}, 3.8899445593879538`*^9, 
   3.8899447795696487`*^9, {3.8899448270195637`*^9, 3.8899448434812284`*^9}, 
   3.889945395383133*^9, {3.8899454874944715`*^9, 3.8899455052923794`*^9}, {
   3.8899455547309666`*^9, 3.8899455581353807`*^9}, {3.88994568393968*^9, 
   3.8899457400495386`*^9}, {3.8899458835722656`*^9, 
   3.8899459583222647`*^9}, {3.889945994435775*^9, 3.8899460213694215`*^9}, {
   3.889946059158428*^9, 3.889946140373776*^9}, {3.889946198344349*^9, 
   3.8899462219371777`*^9}, {3.889946318902953*^9, 3.8899463772174273`*^9}, {
   3.889946467317831*^9, 3.889946469193082*^9}, {3.8899466053737216`*^9, 
   3.889946627484722*^9}, {3.889946669597623*^9, 3.8899466984196105`*^9}, {
   3.8899469166686463`*^9, 3.8899469666963325`*^9}, {3.88994700529974*^9, 
   3.8899470583084955`*^9}, {3.8899471299899282`*^9, 
   3.8899471435970993`*^9}, {3.8899472486373386`*^9, 3.889947270540387*^9}, {
   3.8899558659882655`*^9, 3.8899558956198854`*^9}, {3.889955982344674*^9, 
   3.8899560057088594`*^9}, {3.8899568019703665`*^9, 3.889956802592519*^9}, {
   3.8899575283594313`*^9, 3.8899575302224092`*^9}, {3.8900420914393554`*^9, 
   3.8900421119984007`*^9}, {3.8900421589809875`*^9, 3.8900422855653543`*^9}, 
   3.890042387858906*^9, {3.8900424307643547`*^9, 3.890042501031494*^9}, {
   3.890042574214532*^9, 3.890042577221221*^9}, {3.890042725353606*^9, 
   3.890042740553139*^9}, {3.890042773443062*^9, 3.890042961254455*^9}, {
   3.8900430501463137`*^9, 3.8900430515141673`*^9}, {3.89004309897432*^9, 
   3.890043249869273*^9}, {3.890043352870349*^9, 3.8900434028994055`*^9}, {
   3.8900435378741245`*^9, 3.8900435665674005`*^9}, {3.890043952645761*^9, 
   3.890043971580956*^9}, 3.8900442883407793`*^9, {3.8900443726597924`*^9, 
   3.890044460918511*^9}, {3.890044528255747*^9, 3.8900446105493317`*^9}, {
   3.890044698720703*^9, 3.8900447093232393`*^9}, {3.890044970041431*^9, 
   3.8900450006962748`*^9}, 3.8900451020935583`*^9, {3.890045247479364*^9, 
   3.8900452993950977`*^9}, {3.890045942272016*^9, 3.890046004408357*^9}, {
   3.8900460759063196`*^9, 3.890046126690826*^9}, {3.89004620152983*^9, 
   3.8900462170349426`*^9}, 3.890048204287811*^9, {3.8900890103203635`*^9, 
   3.8900890188401318`*^9}, {3.890144033560033*^9, 3.890144073687067*^9}, {
   3.8901441247696705`*^9, 3.890144127552067*^9}, {3.8901441832989974`*^9, 
   3.890144186291032*^9}, {3.8901442215953393`*^9, 3.8901442350593348`*^9}, {
   3.8901442931526575`*^9, 3.8901443272996445`*^9}, {3.8901443717883396`*^9, 
   3.890144408922104*^9}, {3.890144456219353*^9, 3.8901444890756826`*^9}, {
   3.8901445223575172`*^9, 3.8901445768744044`*^9}, {3.890181328306282*^9, 
   3.8901814354297476`*^9}, {3.8901815422554646`*^9, 3.890181549486582*^9}, {
   3.8901816535273857`*^9, 3.890181654052816*^9}, {3.8901823851755366`*^9, 
   3.8901824148427696`*^9}, 3.890182658923005*^9, {3.8901828068282766`*^9, 
   3.89018284175289*^9}, {3.890182884458604*^9, 3.8901828979936805`*^9}, {
   3.8901829402515116`*^9, 3.8901829538587465`*^9}, 3.8901830756224203`*^9, {
   3.8901831736209126`*^9, 3.890183176305235*^9}, 3.890183238564123*^9, {
   3.8901833498598547`*^9, 3.8901833923615522`*^9}, {3.890183428029031*^9, 
   3.890183466372332*^9}, {3.8901835100041647`*^9, 3.890183519388236*^9}, {
   3.890183663244774*^9, 3.890183760028938*^9}, {3.8901838010933743`*^9, 
   3.8901838486358004`*^9}, {3.890183884461525*^9, 3.890183886698737*^9}, {
   3.8901839471502185`*^9, 3.8901839484837446`*^9}, {3.8901841176042604`*^9, 
   3.8901841521091747`*^9}, {3.8901841883656917`*^9, 
   3.8901842006681395`*^9}, {3.8901842319728584`*^9, 
   3.8901842341494694`*^9}, {3.890184269436945*^9, 3.890184270501288*^9}, {
   3.890184305437231*^9, 3.890184329732448*^9}, {3.890184444981838*^9, 
   3.890184475454788*^9}, {3.8901845474531603`*^9, 3.890184549193947*^9}, 
   3.890189076979238*^9, {3.890189755384713*^9, 3.890189767785641*^9}, {
   3.890189798897437*^9, 3.890189889690797*^9}, {3.890189949884261*^9, 
   3.8901900043299456`*^9}, 3.8901900436583524`*^9, {3.8901902737669725`*^9, 
   3.890190275430011*^9}, {3.8901903783760247`*^9, 3.890190426340412*^9}, {
   3.8901905361462116`*^9, 3.8901905601951227`*^9}, {3.890190591754942*^9, 
   3.8901905929368563`*^9}, {3.890190644615448*^9, 3.8901906637338324`*^9}, {
   3.8901907017539673`*^9, 3.8901907023615723`*^9}, {3.8901908104549975`*^9, 
   3.890190812279312*^9}, 3.890190843009019*^9, {3.8901908867593307`*^9, 
   3.8901908898540854`*^9}, {3.8901912650001645`*^9, 3.890191292852403*^9}, {
   3.8901913345150733`*^9, 3.890191350459409*^9}, {3.8902680913162374`*^9, 
   3.890268094292413*^9}, 3.890301834045525*^9, {3.8909626935979834`*^9, 
   3.8909627220129757`*^9}, {3.893296926175733*^9, 3.893296961945918*^9}, 
   3.8932979836285715`*^9, 3.8933003222895164`*^9, {3.893301574228834*^9, 
   3.8933017151000257`*^9}, {3.8933017510368032`*^9, 
   3.8933017978840475`*^9}, {3.893301957611462*^9, 3.8933019654421716`*^9}, {
   3.8933020856566544`*^9, 3.893302100881911*^9}, {3.893302514079333*^9, 
   3.893302583600073*^9}, {3.893302615202018*^9, 3.8933026992213097`*^9}, {
   3.893303611670597*^9, 3.8933036133151484`*^9}, {3.8944579753224554`*^9, 
   3.8944579757548494`*^9}, 3.894711716481846*^9, {3.8947204838522577`*^9, 
   3.8947205135393276`*^9}, {3.8947208515105457`*^9, 
   3.8947208593544407`*^9}, {3.895102772365307*^9, 3.895102774074942*^9}, 
   3.8951028583200865`*^9, {3.8951028989275703`*^9, 3.89510294678087*^9}, {
   3.8951029823405123`*^9, 3.8951030599580917`*^9}, {3.8951038237088118`*^9, 
   3.8951038493749394`*^9}, {3.895103950004648*^9, 3.895103986813382*^9}, 
   3.8951040178821483`*^9, {3.8951041859659295`*^9, 3.895104270869351*^9}, {
   3.8951043293974447`*^9, 3.895104333085981*^9}, 3.8951049539891477`*^9, {
   3.895105001271541*^9, 3.895105019294224*^9}, 3.895105173442089*^9, 
   3.8951052037283487`*^9, {3.895105233787914*^9, 3.8951053207568097`*^9}, {
   3.895105357323273*^9, 3.8951053632742367`*^9}, {3.8951054008223143`*^9, 
   3.8951054381428165`*^9}, {3.8951054908168335`*^9, 3.895105502838652*^9}, {
   3.895106014811174*^9, 3.8951060264854684`*^9}, 3.895106089303618*^9, {
   3.895106403421008*^9, 3.8951065477029467`*^9}, {3.895106580148337*^9, 
   3.895106613119018*^9}, {3.895106661052926*^9, 3.8951067006634674`*^9}, {
   3.895106750053421*^9, 3.8951067965642114`*^9}, {3.8951068284265995`*^9, 
   3.8951068307079663`*^9}, {3.8951069841590796`*^9, 3.895106998579111*^9}, 
   3.895107172715089*^9, {3.895133523729762*^9, 3.895133739096006*^9}, {
   3.8951338913043327`*^9, 3.895134098180043*^9}, {3.895134151427535*^9, 
   3.8951342618685017`*^9}, {3.895134394940778*^9, 3.895134438590184*^9}, {
   3.895134472944626*^9, 3.89513448280888*^9}, {3.8951346275892253`*^9, 
   3.8951346666775827`*^9}, {3.895134800014253*^9, 3.8951348102690897`*^9}, {
   3.8951348642007713`*^9, 3.8951349175057898`*^9}, {3.89513497902501*^9, 
   3.8951349982645025`*^9}, {3.895135028528105*^9, 3.8951350400250616`*^9}, {
   3.8951351045867424`*^9, 3.8951351584141936`*^9}, {3.8951351893871365`*^9, 
   3.895135282740275*^9}, {3.8951353372382717`*^9, 3.8951353458784857`*^9}, {
   3.895135385303756*^9, 3.8951353861085854`*^9}, {3.8951354522932515`*^9, 
   3.8951354533893595`*^9}, {3.8951355791052437`*^9, 3.895135703656583*^9}, {
   3.8951369005966773`*^9, 3.8951369193898554`*^9}, {3.895136963075611*^9, 
   3.895136985279002*^9}, {3.8951370184731646`*^9, 3.8951370328500824`*^9}, 
   3.895137207175909*^9, {3.895137238000881*^9, 3.89513723822528*^9}, 
   3.8951372720162916`*^9, {3.8951373111217523`*^9, 3.895137311271352*^9}, {
   3.895137345064431*^9, 3.8951373452180223`*^9}, {3.895137379689577*^9, 
   3.8951373799201064`*^9}, {3.895137413728759*^9, 3.89513742131886*^9}, 
   3.895137681104041*^9, {3.8951377250667143`*^9, 3.895137753430656*^9}, {
   3.895137802389783*^9, 3.895137837047263*^9}, {3.8951380857232847`*^9, 
   3.8951381411736307`*^9}, {3.8951382575600863`*^9, 
   3.8951382578749523`*^9}, {3.895138291240179*^9, 3.895138428328014*^9}, {
   3.895138460409407*^9, 3.89513849388809*^9}, {3.895139894171933*^9, 
   3.8951398989587383`*^9}, {3.8951399968778715`*^9, 
   3.8951399974978876`*^9}, {3.895192987095215*^9, 3.8951932659563026`*^9}, {
   3.895199687433219*^9, 3.8951997137865133`*^9}, {3.895202665557519*^9, 
   3.8952026909174633`*^9}, {3.895202725669363*^9, 3.8952027520733767`*^9}, {
   3.8952134970233817`*^9, 3.895213505085805*^9}, {3.895213639806549*^9, 
   3.8952136455341525`*^9}, {3.895214414133627*^9, 3.8952144175981455`*^9}, {
   3.8952147947804475`*^9, 3.895214806620515*^9}, {3.89537475581094*^9, 
   3.8953748028894434`*^9}, {3.895374918243289*^9, 3.8953749795205126`*^9}, {
   3.895375088773273*^9, 3.895375095197541*^9}, {3.895375126617135*^9, 
   3.895375251737317*^9}, {3.895375282817706*^9, 3.8953753051561613`*^9}, 
   3.8953754268935633`*^9, {3.895375615862465*^9, 3.895375617293778*^9}, {
   3.895375692949439*^9, 3.895375704228125*^9}, {3.8953757355881596`*^9, 
   3.8953758393811827`*^9}, {3.8953758763122244`*^9, 3.895375879452325*^9}, {
   3.8953759104934416`*^9, 3.8953759476651773`*^9}, {3.8960939562372866`*^9, 
   3.8960939743092146`*^9}, {3.8960940658544483`*^9, 
   3.8960941319128475`*^9}, {3.896094168982067*^9, 3.896094216553314*^9}, 
   3.8960943623492203`*^9, {3.896094525521871*^9, 3.896094560302777*^9}, {
   3.896096510551694*^9, 3.8960965109462347`*^9}, {3.8960983743552513`*^9, 
   3.896098408085474*^9}, {3.89609878102297*^9, 3.896098782821659*^9}, {
   3.896098854134199*^9, 3.896098938585807*^9}, 3.896099493052823*^9, {
   3.8960996771062245`*^9, 3.8960996800310073`*^9}, 3.8961018172930627`*^9, {
   3.896102052815217*^9, 3.8961020637528105`*^9}, {3.896102106232205*^9, 
   3.896102117528488*^9}, {3.896102249002103*^9, 3.89610229791122*^9}, {
   3.8961023381907735`*^9, 3.8961025251984057`*^9}, {3.8961025584359255`*^9, 
   3.896102564198048*^9}, {3.8961026052854276`*^9, 3.8961026140389605`*^9}, {
   3.896102742948063*^9, 3.896102815391392*^9}, {3.8961044469405603`*^9, 
   3.8961044803675537`*^9}, {3.896104731888954*^9, 3.896104754711474*^9}, {
   3.8961047920146313`*^9, 3.896105163933402*^9}, 3.8961052058512826`*^9, {
   3.8961053270255833`*^9, 3.8961056300656896`*^9}, 3.896105683998449*^9, {
   3.8961058814642315`*^9, 3.8961059179709063`*^9}, 3.8961059880831814`*^9, 
   3.8961062059475403`*^9, {3.89610653262334*^9, 3.8961065431607447`*^9}, {
   3.8961067574304695`*^9, 3.896106794322425*^9}, {3.896108089150506*^9, 
   3.896108133364321*^9}, {3.8961441479878845`*^9, 3.896144148180993*^9}, 
   3.896144335602813*^9, {3.8961444655962467`*^9, 3.896144467789935*^9}, {
   3.8961458793430805`*^9, 3.896145884473133*^9}, 3.896160715122693*^9, {
   3.89625715649732*^9, 3.8962571603839593`*^9}, 3.8962572240451064`*^9, {
   3.896257355667568*^9, 3.8962575192069387`*^9}, {3.896257580050412*^9, 
   3.8962576583234777`*^9}, {3.8962576951377215`*^9, 
   3.8962577447558737`*^9}, {3.8962577986519547`*^9, 3.896257869555705*^9}, {
   3.896257942956865*^9, 3.8962580112798038`*^9}, {3.8962580505074577`*^9, 
   3.8962580663968744`*^9}, {3.8962581046580715`*^9, 3.896258229042807*^9}, {
   3.896258267052122*^9, 3.896258282531068*^9}, {3.8962583318447647`*^9, 
   3.896258345568968*^9}, {3.8962664140135317`*^9, 3.8962664280265303`*^9}, {
   3.8962673434645643`*^9, 3.8962673617599936`*^9}, {3.896271140160552*^9, 
   3.896271155856122*^9}, 3.8962711999514704`*^9, {3.896412171443128*^9, 
   3.896412193706396*^9}, {3.896412614470463*^9, 3.8964126231995735`*^9}, {
   3.896412682050846*^9, 3.896412720028432*^9}, {3.896413258874009*^9, 
   3.8964133718994684`*^9}, {3.8964134328816423`*^9, 3.896413463173186*^9}, {
   3.896413494887967*^9, 3.8964135250509434`*^9}, {3.89641364009182*^9, 
   3.8964136818883543`*^9}, {3.896413721383834*^9, 3.896413759794141*^9}, {
   3.896414405126267*^9, 3.896414407675375*^9}, {3.8964144537593904`*^9, 
   3.8964144722353168`*^9}, {3.8964151283834047`*^9, 3.896415129564266*^9}, {
   3.8964152410343866`*^9, 3.8964152469205837`*^9}, {3.8964156320535064`*^9, 
   3.8964156327092285`*^9}, 3.8964164543300343`*^9, 3.896416593551132*^9, 
   3.8964166357452545`*^9, 3.89641678134694*^9, {3.896416818138813*^9, 
   3.8964168427643104`*^9}, {3.8964172202800245`*^9, 
   3.8964172277274003`*^9}, {3.8964172609907584`*^9, 
   3.8964172748972206`*^9}, {3.8964173540392985`*^9, 3.896417370677457*^9}, {
   3.896417551535179*^9, 3.896417557045345*^9}, {3.896417661346346*^9, 
   3.896417696503177*^9}, 3.8977993245980988`*^9, 3.8978152855965223`*^9, 
   3.8978153172069674`*^9, 3.8978153553329687`*^9, 3.8978158232823167`*^9, {
   3.8978159349904804`*^9, 3.8978160041664143`*^9}, {3.8978161048320804`*^9, 
   3.897816106654236*^9}, {3.897816162014146*^9, 3.8978161965427637`*^9}, {
   3.897816307808837*^9, 3.897816310017925*^9}, {3.8978166569338655`*^9, 
   3.89781666841016*^9}, 3.8978167113792057`*^9, {3.89781675334194*^9, 
   3.8978167707872715`*^9}, {3.8978168337896957`*^9, 3.897816904328893*^9}, {
   3.8978169723429413`*^9, 3.8978170046215887`*^9}, {3.8978170664960623`*^9, 
   3.897817164992564*^9}, {3.8978172586829214`*^9, 3.897817295691921*^9}, {
   3.897817385840722*^9, 3.897817401083976*^9}, 3.897817435250537*^9, {
   3.8978174674687233`*^9, 3.8978175206923437`*^9}, {3.8978177698237076`*^9, 
   3.897817810325361*^9}, {3.897818201089054*^9, 3.8978182078978443`*^9}, {
   3.897818304854455*^9, 3.897818311724079*^9}, 3.897818350730729*^9, {
   3.8978184826826987`*^9, 3.897818544435527*^9}, {3.8978187182920675`*^9, 
   3.897818792748872*^9}, {3.8978188399226723`*^9, 3.8978188481616015`*^9}, {
   3.8978188798339114`*^9, 3.8978189094257383`*^9}, {3.8978189525812864`*^9, 
   3.897818999354163*^9}, {3.897819040437253*^9, 3.897819105121213*^9}, {
   3.89781922673487*^9, 3.8978192346596813`*^9}, {3.8978195842985425`*^9, 
   3.897819587756262*^9}, 3.897819658905953*^9, 3.897819694354121*^9, {
   3.897819977154574*^9, 3.897819993370194*^9}, 3.897826989598531*^9, 
   3.8978271413459826`*^9, {3.897873106596656*^9, 3.897873154898408*^9}, {
   3.897873187645174*^9, 3.897873188228932*^9}, {3.897873238564248*^9, 
   3.897873248363668*^9}, {3.8978733041622205`*^9, 3.8978733392421937`*^9}, {
   3.8978734026744847`*^9, 3.8978734301766963`*^9}, 3.897873577144493*^9, {
   3.897873623977851*^9, 3.8978736463105063`*^9}, {3.89787369555297*^9, 
   3.8978737235544815`*^9}, 3.897873784642568*^9, {3.897873823326708*^9, 
   3.8978740171529784`*^9}, {3.8978740833459215`*^9, 3.897874123151864*^9}, {
   3.8978741884131374`*^9, 3.897874229303754*^9}, {3.897874966997158*^9, 
   3.897875093322692*^9}, {3.897875133395675*^9, 3.897875225522232*^9}, {
   3.897875286814827*^9, 3.897875286881479*^9}, {3.897875342004633*^9, 
   3.8978753420731306`*^9}, {3.8978753792542005`*^9, 3.897875632814218*^9}, {
   3.8978756706319675`*^9, 3.8978758183314095`*^9}, {3.8978758488096313`*^9, 
   3.8978758870171394`*^9}, {3.8978760468570337`*^9, 
   3.8978761011310415`*^9}, {3.897876141286393*^9, 3.8978761496517887`*^9}, {
   3.8978761891093316`*^9, 3.8978761967491217`*^9}, {3.8981302804705706`*^9, 
   3.898130335777832*^9}, {3.8981304582705708`*^9, 3.898130458890045*^9}, {
   3.898130566947158*^9, 3.8981305681520805`*^9}, {3.8981306202801247`*^9, 
   3.8981306368731337`*^9}, 3.8981308965755634`*^9, 3.8981309577073355`*^9, 
   3.8981310069946585`*^9, {3.8981311867645326`*^9, 3.898131190145913*^9}, 
   3.8981312803568544`*^9, {3.8981313269141955`*^9, 3.8981313299793406`*^9}, {
   3.898131778827838*^9, 3.898131805729*^9}, 3.8981509208216295`*^9, 
   3.898151545203633*^9, {3.8981516826798487`*^9, 3.8981516834308443`*^9}, {
   3.8981518872246513`*^9, 3.8981519081446905`*^9}, 3.8981625694561744`*^9, {
   3.898162656260956*^9, 3.898162719697246*^9}, {3.89816276712833*^9, 
   3.898162877546967*^9}, {3.898162909553348*^9, 3.8981630721863413`*^9}, 
   3.8981634874558086`*^9, {3.8981635259405212`*^9, 3.89816353762064*^9}, {
   3.898163677652418*^9, 3.8981637036470633`*^9}, {3.8981637946218076`*^9, 
   3.8981638238644505`*^9}, 3.8981638717226667`*^9, {3.898165822458844*^9, 
   3.898165851458083*^9}, {3.8981661632161036`*^9, 3.89816617136926*^9}, 
   3.8981673992350855`*^9, {3.8981675538232937`*^9, 3.8981676549370975`*^9}, 
   3.8981677626610527`*^9, 3.8981678174717717`*^9, 3.8981678707258344`*^9, 
   3.898167903102314*^9, {3.8981683540618815`*^9, 3.8981684242386885`*^9}, {
   3.8981684842707405`*^9, 3.898168509509935*^9}, {3.8981685571925077`*^9, 
   3.8981686656291103`*^9}, 3.89817069973265*^9, 3.898170781126873*^9, {
   3.8981732594634686`*^9, 3.8981732846773653`*^9}, {3.8981733333686376`*^9, 
   3.898173357021383*^9}, 3.898173604861474*^9, {3.898215937930523*^9, 
   3.8982160191603603`*^9}, {3.8982160549312754`*^9, 3.898216080735871*^9}, {
   3.8982161357938547`*^9, 3.898216157426261*^9}, 3.89821622085822*^9, {
   3.8982162593368273`*^9, 3.898216367049966*^9}, {3.898216923174966*^9, 
   3.898216926088971*^9}, 3.898216983482819*^9, 3.8982176621447096`*^9, {
   3.898217700381216*^9, 3.8982177410744524`*^9}, {3.8982179040494647`*^9, 
   3.898217904353591*^9}, {3.8982187190572853`*^9, 3.898218735111622*^9}, {
   3.8982187720979676`*^9, 3.898218820247901*^9}, {3.8982188803332486`*^9, 
   3.8982189349599733`*^9}, {3.8982189688417587`*^9, 3.898219015898264*^9}, {
   3.898219055690175*^9, 3.898219168770887*^9}, {3.898219209665324*^9, 
   3.8982192152519784`*^9}, {3.8982193499009333`*^9, 
   3.8982193556543064`*^9}, {3.898219439174344*^9, 3.8982194408860645`*^9}, {
   3.8982194860635023`*^9, 3.8982195209076037`*^9}, {3.8982195543859663`*^9, 
   3.898219604307821*^9}, {3.8982199534985*^9, 3.898220020538967*^9}, {
   3.8982201321049175`*^9, 3.8982203651019125`*^9}, {3.8982204086142917`*^9, 
   3.8982204125069647`*^9}, {3.8982204668950157`*^9, 
   3.8982205632121005`*^9}, {3.898221217280113*^9, 3.8982212534146557`*^9}, {
   3.8982212965939293`*^9, 3.898221416437995*^9}, {3.8982214535878115`*^9, 
   3.898221481090598*^9}, {3.8982215128441095`*^9, 3.8982216481370373`*^9}, {
   3.898222008815609*^9, 3.898222017235761*^9}, {3.898830102427766*^9, 
   3.8988301563077374`*^9}, {3.898830196651232*^9, 3.8988302125527024`*^9}, {
   3.898830248940688*^9, 3.898830257094594*^9}, {3.898830538359064*^9, 
   3.898830539946297*^9}, {3.8988306371114836`*^9, 3.898830639570419*^9}, 
   3.898837586042077*^9, {3.898837720331583*^9, 3.8988377236826267`*^9}, {
   3.8988379457052584`*^9, 3.898837948264417*^9}, 3.8988381962496605`*^9, {
   3.898838649180523*^9, 3.898838683361071*^9}, {3.899028489818324*^9, 
   3.8990285664995623`*^9}, {3.89902863012218*^9, 3.8990286488715267`*^9}, {
   3.8990286801440525`*^9, 3.899028716434069*^9}, {3.8990287949919786`*^9, 
   3.8990288752253733`*^9}, {3.8990289151219172`*^9, 
   3.8990289204599686`*^9}, {3.899028958578725*^9, 3.899029016080231*^9}, {
   3.8990291793854313`*^9, 3.8990291812389483`*^9}, {3.8990292123915668`*^9, 
   3.8990292203170357`*^9}, {3.899081066274716*^9, 3.899081140589404*^9}, {
   3.899081182127341*^9, 3.899081195504881*^9}, 3.899081271817197*^9, {
   3.8990813134455433`*^9, 3.899081588480482*^9}, {3.8990816333066406`*^9, 
   3.8990817303099985`*^9}, {3.899081787592226*^9, 3.8990818652483225`*^9}, {
   3.8990819315995445`*^9, 3.899082123574726*^9}, {3.8990822179259977`*^9, 
   3.89908224982895*^9}, {3.899082299026061*^9, 3.899082329079873*^9}, {
   3.8990823657131166`*^9, 3.8990823838489*^9}, {3.899082426824664*^9, 
   3.899082516790594*^9}, {3.899082575467948*^9, 3.899082620340599*^9}, 
   3.899082652570714*^9, 3.899082701070791*^9, {3.8990827355738125`*^9, 
   3.899082759839547*^9}, {3.8990827915786295`*^9, 3.8990830496849937`*^9}, {
   3.8990830898221426`*^9, 3.899083336015546*^9}, {3.8990833735615187`*^9, 
   3.8990835539777665`*^9}, 3.899083611297847*^9, {3.8990836432492294`*^9, 
   3.8990838087623405`*^9}, {3.899084175728409*^9, 3.8990842039783897`*^9}, 
   3.8990848476455708`*^9, {3.8990872618457613`*^9, 3.8990873555635457`*^9}, {
   3.8990874096531477`*^9, 3.8990876181052094`*^9}, {3.899087682343094*^9, 
   3.899087699454878*^9}, {3.8990877907706804`*^9, 3.899087917189807*^9}, 
   3.899087960782035*^9, {3.89908799597147*^9, 3.8990880491930437`*^9}, {
   3.899088081836149*^9, 3.899088111863233*^9}, {3.8990881524223795`*^9, 
   3.899088208393346*^9}, {3.8990882418326974`*^9, 3.899088261256405*^9}, {
   3.899088303387349*^9, 3.8990883864918184`*^9}, {3.899088445957296*^9, 
   3.8990886073739567`*^9}, {3.899088884182867*^9, 3.899088956840053*^9}, {
   3.8990890117124166`*^9, 3.899089112934986*^9}, {3.8990892373485813`*^9, 
   3.8990892643336296`*^9}, {3.899089328409405*^9, 3.8990893723302193`*^9}, {
   3.899089459433174*^9, 3.8990895166386595`*^9}, {3.899089704185836*^9, 
   3.8990897621125793`*^9}, {3.899089792582755*^9, 3.8990899157862053`*^9}, {
   3.899089954890085*^9, 3.899089975353969*^9}, {3.899090344438896*^9, 
   3.899090433101904*^9}, 3.899090564616111*^9, {3.899090681421831*^9, 
   3.8990906839331913`*^9}, {3.899090811584858*^9, 3.899090856757537*^9}, {
   3.899113797616858*^9, 3.8991138007392435`*^9}, 3.8991138475979214`*^9, {
   3.899113911841748*^9, 3.8991139136127205`*^9}, {3.8991139445921288`*^9, 
   3.89911400898592*^9}, {3.8991140681705556`*^9, 3.899114101899564*^9}, {
   3.899114217755885*^9, 3.899114256014344*^9}, {3.8991142945484114`*^9, 
   3.899114322174952*^9}, {3.899114371237055*^9, 3.899114371877388*^9}, {
   3.8991144042283936`*^9, 3.899114404662321*^9}, {3.899114441391589*^9, 
   3.8991144417907553`*^9}, {3.8991145655323257`*^9, 
   3.8991146357238517`*^9}, {3.8991146823573647`*^9, 
   3.8991147374768953`*^9}, {3.8991147939325066`*^9, 3.899114859622345*^9}, {
   3.8991149918481207`*^9, 3.8991149935092554`*^9}, {3.899115063608054*^9, 
   3.899115065881799*^9}, {3.899115230049691*^9, 3.8991152318031583`*^9}, {
   3.899115344697747*^9, 3.899115345395173*^9}, {3.899115401657462*^9, 
   3.8991155370966883`*^9}, {3.8991155674292727`*^9, 
   3.8991155686556263`*^9}, {3.8991159826827917`*^9, 3.89911600379249*^9}, {
   3.8991160745049777`*^9, 3.8991161391881313`*^9}, {3.8991167075984015`*^9, 
   3.8991167653790903`*^9}, {3.899117612440492*^9, 3.8991176219560413`*^9}, {
   3.899118019608417*^9, 3.899118021779317*^9}, {3.899118218253971*^9, 
   3.899118222065434*^9}, {3.899118277503124*^9, 3.8991186220490303`*^9}, {
   3.8991187733922405`*^9, 3.899118796942034*^9}, {3.89911903121634*^9, 
   3.899119230506955*^9}, {3.899119265951847*^9, 3.8991192678424234`*^9}, {
   3.8991193030722914`*^9, 3.899119305885771*^9}, {3.89911933673376*^9, 
   3.8991194441438723`*^9}, {3.8992057621700964`*^9, 3.899205783700801*^9}, {
   3.8992058160393515`*^9, 3.8992058382451077`*^9}, {3.899205878132901*^9, 
   3.899205880297946*^9}, {3.8992059243765*^9, 3.8992059369993563`*^9}, {
   3.8992059829142942`*^9, 3.899206168838101*^9}, {3.8992062025381794`*^9, 
   3.8992062103325577`*^9}, {3.8992062407521563`*^9, 
   3.8992062489515524`*^9}, {3.899206396110832*^9, 3.8992064207913632`*^9}, {
   3.8992064770658903`*^9, 3.8992065053378267`*^9}, {3.8992065732007217`*^9, 
   3.899206602614044*^9}, {3.8992066379421873`*^9, 3.899206681782779*^9}, {
   3.8992069506688433`*^9, 3.8992070262580485`*^9}, {3.8992473082309113`*^9, 
   3.8992473088544207`*^9}, {3.8992474502800894`*^9, 3.899247456835202*^9}, 
   3.900459585916747*^9, 3.9004596170322495`*^9, 3.900459678862625*^9, 
   3.9004597295379877`*^9, {3.90045977230941*^9, 3.9004598175921125`*^9}, 
   3.900459960882841*^9, {3.900460013450094*^9, 3.9004600663261213`*^9}, {
   3.9004601944430285`*^9, 3.900460267125937*^9}, {3.9004604534713545`*^9, 
   3.9004604900486574`*^9}, 3.9004609179360056`*^9, {3.900461058707717*^9, 
   3.900461059104241*^9}, 3.900461144726285*^9, {3.900461183099968*^9, 
   3.9004612054035835`*^9}, 3.9004612743577356`*^9, {3.9004613120691757`*^9, 
   3.900461341693164*^9}, {3.9004613888644695`*^9, 3.9004614369451857`*^9}, {
   3.900461614386319*^9, 3.9004616152152853`*^9}, {3.9004616530970945`*^9, 
   3.900461654052414*^9}, {3.900468118201461*^9, 3.9004681899857006`*^9}, 
   3.900468259400933*^9, 3.900468292904468*^9, {3.9008994345130258`*^9, 
   3.90089945953831*^9}, 3.900899702701385*^9, 3.900899768666421*^9, {
   3.9008998216658683`*^9, 3.9008998248700595`*^9}, {3.9009017248979793`*^9, 
   3.9009017422429905`*^9}, {3.9009019577842846`*^9, 
   3.9009019584319463`*^9}, {3.9009020191028657`*^9, 3.900902047595004*^9}, {
   3.9014213723063083`*^9, 3.9014214077010612`*^9}, {3.9014215188073845`*^9, 
   3.901421545386093*^9}, {3.9014215940850134`*^9, 3.9014215974038553`*^9}, {
   3.9014220363369675`*^9, 3.9014220448710337`*^9}, {3.9014221105388594`*^9, 
   3.901422124066904*^9}, {3.9014221685208178`*^9, 3.9014222227235346`*^9}, {
   3.901422266129286*^9, 3.901422288057865*^9}, {3.901422484333585*^9, 
   3.9014225035214014`*^9}, 3.9015308655017653`*^9, {3.901530931832739*^9, 
   3.901530940281681*^9}, {3.9016153207833037`*^9, 3.90161533638723*^9}, {
   3.901615544102832*^9, 3.90161558031358*^9}, {3.901615617778143*^9, 
   3.9016156417124095`*^9}, {3.901615763121832*^9, 3.901615806440047*^9}, {
   3.901615849696336*^9, 3.90161585014073*^9}, {3.9016159665066624`*^9, 
   3.9016160161791663`*^9}, {3.9016160534093304`*^9, 
   3.9016161381439123`*^9}, {3.9016161853231287`*^9, 3.901616194860418*^9}, {
   3.9016162309396696`*^9, 3.9016162646438885`*^9}, {3.901616372546308*^9, 
   3.9016163823919516`*^9}, {3.9016166050050087`*^9, 
   3.9016166078605213`*^9}, {3.901616645753832*^9, 3.9016167598812556`*^9}, {
   3.9016216337646713`*^9, 3.9016216589528437`*^9}, {3.9016217150094433`*^9, 
   3.901621830429638*^9}, {3.9017024980788527`*^9, 3.9017025459946356`*^9}, {
   3.901702585184025*^9, 3.9017026609700723`*^9}, {3.901702762891167*^9, 
   3.9017030084494877`*^9}, {3.9017030390343885`*^9, 
   3.9017032118307333`*^9}, {3.9017033142101383`*^9, 3.901703493563278*^9}, {
   3.901703540012766*^9, 3.901703594443776*^9}, {3.9017037313004704`*^9, 
   3.9017040447973614`*^9}, {3.9019556099089217`*^9, 
   3.9019556108431873`*^9}, {3.901955665921261*^9, 3.9019556992416325`*^9}, {
   3.901956176904191*^9, 3.901956177886307*^9}, {3.9019562704784937`*^9, 
   3.9019562717899656`*^9}, {3.902059443950706*^9, 3.9020594649305286`*^9}, 
   3.90205996946043*^9, 3.9021229877413807`*^9, {3.902188245269134*^9, 
   3.9021882673679075`*^9}, {3.902188302568705*^9, 3.9021883339813967`*^9}, {
   3.902188530686967*^9, 3.9021885926955986`*^9}, {3.902188641936278*^9, 
   3.90218868077337*^9}, {3.9022257843230867`*^9, 3.902226033014397*^9}, {
   3.9022310137659225`*^9, 3.902231015351775*^9}, {3.902231062842846*^9, 
   3.9022311045123615`*^9}, 3.9022845006132326`*^9, 3.902506248035385*^9, 
   3.902532027565723*^9, {3.902532058732605*^9, 3.9025320668269653`*^9}, {
   3.9025320982372413`*^9, 3.902532290224365*^9}, {3.902748179378034*^9, 
   3.9027483653146687`*^9}, {3.902748396601734*^9, 3.9027484180421286`*^9}, {
   3.9027485470411606`*^9, 3.902748650594473*^9}, {3.9027487491801214`*^9, 
   3.9027488407375093`*^9}, {3.9027497860650883`*^9, 3.902749851682324*^9}, {
   3.9027498842597494`*^9, 3.9027499637691135`*^9}, {3.902750075539979*^9, 
   3.9027502079440393`*^9}, 3.902750247265777*^9, {3.902750467589864*^9, 
   3.902750550613866*^9}, {3.9027505811320457`*^9, 3.9027506282780523`*^9}, {
   3.902750672257616*^9, 3.9027507349031935`*^9}, {3.902750774959872*^9, 
   3.9027508455268383`*^9}, {3.9027508860831633`*^9, 3.9027509474419374`*^9}, 
   3.9027509851537347`*^9, {3.9028823859088535`*^9, 3.9028823885670433`*^9}, 
   3.904127502084565*^9, 3.9041275341563015`*^9, 3.9041275781276054`*^9, {
   3.9041276155973*^9, 3.9041277036215086`*^9}, {3.904130101143835*^9, 
   3.9041301120329213`*^9}, {3.9041459171361127`*^9, 3.904145975007594*^9}, {
   3.904735373892845*^9, 3.9047353761094217`*^9}},
 CellTags->"Datasets",
 CellLabel->
  "In[1055]:=",ExpressionUUID->"68b99d57-a3f0-46b9-bd7f-12e7e8a00187"]
}, Open  ]],

Cell[CellGroupData[{

Cell[TextData[StyleBox["Code",
 FontSize->10]], "Subsubsubsubsection",
 Editable->False,
 CellChangeTimes->{{3.805073314339836*^9, 3.80507333536786*^9}, {
   3.805073439614975*^9, 3.8050734602420187`*^9}, {3.8066346558494463`*^9, 
   3.8066347247297487`*^9}, {3.806634802358505*^9, 3.8066348105295067`*^9}, {
   3.8066664862909436`*^9, 3.806666502895442*^9}, 3.8070765097138042`*^9, {
   3.8070767128593364`*^9, 3.8070767130363336`*^9}, {3.857308171862177*^9, 
   3.8573081718631754`*^9}, {3.8893553003409805`*^9, 
   3.8893553256636953`*^9}, {3.8945014796489444`*^9, 3.894501480656904*^9}, {
   3.8945024043949556`*^9, 3.894502404400076*^9}, 3.894502523405162*^9, {
   3.8945129324325924`*^9, 3.8945129577291107`*^9}, {3.8945543659519515`*^9, 
   3.8945543691153607`*^9}, {3.901955899113204*^9, 3.9019559738798094`*^9}, {
   3.9025063575289326`*^9, 3.902506369840227*^9}, {3.902506412551921*^9, 
   3.902506413862876*^9}},ExpressionUUID->"3ce00f08-5d48-424e-9777-\
787655802a0a"],

Cell[CellGroupData[{

Cell[BoxData[{
 RowBox[{
  RowBox[{"$MaxPrecision", " ", "=", " ", "Infinity"}], 
  ";"}], "\[IndentingNewLine]", 
 RowBox[{
  RowBox[{"SetSystemOptions", "[", 
   RowBox[{"\"\<CheckMachineUnderflow\>\"", "->", "False"}], "]"}], 
  ";"}], "\[IndentingNewLine]", 
 RowBox[{
  RowBox[{"d12", "=", 
   RowBox[{"MapThread", "[", 
    RowBox[{
     RowBox[{
      RowBox[{"{", 
       RowBox[{"#1", ",", "#2"}], "}"}], "&"}], ",", 
     RowBox[{"{", 
      RowBox[{"d1", ",", "d2"}], "}"}]}], "]"}]}], ";"}], "\n", 
 RowBox[{
  RowBox[{"nd12", "=", 
   RowBox[{"MapThread", "[", 
    RowBox[{
     RowBox[{
      RowBox[{"{", 
       RowBox[{"#1", ",", "#2"}], "}"}], "&"}], ",", 
     RowBox[{"{", 
      RowBox[{"nd1", ",", "nd2"}], "}"}]}], "]"}]}], ";"}], "\n", 
 RowBox[{
  RowBox[{"v", "=", 
   RowBox[{"N", "[", 
    RowBox[{
     RowBox[{"Length", "[", "d12", "]"}], "/", 
     RowBox[{"(", 
      RowBox[{
       RowBox[{"Length", "[", "d12", "]"}], "+", 
       RowBox[{"Length", "[", "nd12", "]"}]}], ")"}]}], "]"}]}], 
  ";"}], "\[IndentingNewLine]", 
 RowBox[{
  RowBox[{"mid1", "=", 
   RowBox[{"Min", "[", "d1", "]"}]}], ";"}], "\[IndentingNewLine]", 
 RowBox[{
  RowBox[{"mid2", "=", 
   RowBox[{"Min", "[", "d2", "]"}]}], ";"}], "\[IndentingNewLine]", 
 RowBox[{
  RowBox[{"mind1", "=", 
   RowBox[{"Min", "[", "nd1", "]"}]}], ";"}], "\[IndentingNewLine]", 
 RowBox[{
  RowBox[{"mind2", "=", 
   RowBox[{"Min", "[", "nd2", "]"}]}], ";"}], "\[IndentingNewLine]", 
 RowBox[{
  RowBox[{"mad1", "=", 
   RowBox[{"Max", "[", "d1", "]"}]}], ";"}], "\[IndentingNewLine]", 
 RowBox[{
  RowBox[{"mad2", "=", 
   RowBox[{"Max", "[", "d2", "]"}]}], ";"}], "\[IndentingNewLine]", 
 RowBox[{
  RowBox[{"mand1", "=", 
   RowBox[{"Max", "[", "nd1", "]"}]}], ";"}], "\[IndentingNewLine]", 
 RowBox[{
  RowBox[{"mand2", "=", 
   RowBox[{"Max", "[", "nd2", "]"}]}], ";"}], "\[IndentingNewLine]", 
 RowBox[{
  RowBox[{"md1", "=", 
   RowBox[{"Mean", "[", "d1", "]"}]}], ";"}], "\[IndentingNewLine]", 
 RowBox[{
  RowBox[{"md2", "=", 
   RowBox[{"Mean", "[", "d2", "]"}]}], ";"}], "\[IndentingNewLine]", 
 RowBox[{
  RowBox[{"mnd1", "=", 
   RowBox[{"Mean", "[", "nd1", "]"}]}], ";"}], "\[IndentingNewLine]", 
 RowBox[{
  RowBox[{"mnd2", "=", 
   RowBox[{"Mean", "[", "nd2", "]"}]}], ";"}], "\[IndentingNewLine]", 
 RowBox[{
  RowBox[{"mdd1", "=", 
   RowBox[{"Median", "[", "d1", "]"}]}], ";"}], "\[IndentingNewLine]", 
 RowBox[{
  RowBox[{"mdd2", "=", 
   RowBox[{"Median", "[", "d2", "]"}]}], ";"}], "\[IndentingNewLine]", 
 RowBox[{
  RowBox[{"mdnd1", "=", 
   RowBox[{"Median", "[", "nd1", "]"}]}], ";"}], "\[IndentingNewLine]", 
 RowBox[{
  RowBox[{"mdnd2", "=", 
   RowBox[{"Median", "[", "nd2", "]"}]}], ";"}], "\[IndentingNewLine]", 
 RowBox[{
  RowBox[{"sdd1", "=", 
   RowBox[{"StandardDeviation", "[", "d1", "]"}]}], 
  ";"}], "\[IndentingNewLine]", 
 RowBox[{
  RowBox[{"sdd2", "=", 
   RowBox[{"StandardDeviation", "[", "d2", "]"}]}], 
  ";"}], "\[IndentingNewLine]", 
 RowBox[{
  RowBox[{"sdnd1", "=", 
   RowBox[{"StandardDeviation", "[", "nd1", "]"}]}], 
  ";"}], "\[IndentingNewLine]", 
 RowBox[{
  RowBox[{"sdnd2", "=", 
   RowBox[{"StandardDeviation", "[", "nd2", "]"}]}], 
  ";"}], "\[IndentingNewLine]", 
 RowBox[{
  RowBox[{"skd1", "=", 
   RowBox[{"Skewness", "[", "d1", "]"}]}], ";"}], "\[IndentingNewLine]", 
 RowBox[{
  RowBox[{"skd2", "=", 
   RowBox[{"Skewness", "[", "d2", "]"}]}], ";"}], "\[IndentingNewLine]", 
 RowBox[{
  RowBox[{"sknd1", "=", 
   RowBox[{"Skewness", "[", "nd1", "]"}]}], ";"}], "\[IndentingNewLine]", 
 RowBox[{
  RowBox[{"sknd2", "=", 
   RowBox[{"Skewness", "[", "nd2", "]"}]}], ";"}], "\[IndentingNewLine]", 
 RowBox[{
  RowBox[{"kud1", "=", 
   RowBox[{"Kurtosis", "[", "d1", "]"}]}], ";"}], "\[IndentingNewLine]", 
 RowBox[{
  RowBox[{"kud2", "=", 
   RowBox[{"Kurtosis", "[", "d2", "]"}]}], ";"}], "\[IndentingNewLine]", 
 RowBox[{
  RowBox[{"kund1", "=", 
   RowBox[{"Kurtosis", "[", "nd1", "]"}]}], ";"}], "\[IndentingNewLine]", 
 RowBox[{
  RowBox[{"kund2", "=", 
   RowBox[{"Kurtosis", "[", "nd2", "]"}]}], ";"}], "\[IndentingNewLine]", 
 RowBox[{
  RowBox[{"cod", "=", 
   RowBox[{
    RowBox[{"Correlation", "[", "d12", "]"}], "[", 
    RowBox[{"[", 
     RowBox[{"1", ",", "2"}], "]"}], "]"}]}], ";"}], "\[IndentingNewLine]", 
 RowBox[{
  RowBox[{"cond", "=", 
   RowBox[{
    RowBox[{"Correlation", "[", "nd12", "]"}], "[", 
    RowBox[{"[", 
     RowBox[{"1", ",", "2"}], "]"}], "]"}]}], ";"}], "\[IndentingNewLine]", 
 RowBox[{
  RowBox[{
   RowBox[{"su", "[", 
    RowBox[{"sigma_", ",", "u1_", ",", "u2_"}], "]"}], ":=", 
   SqrtBox[
    RowBox[{
     SuperscriptBox["sigma", "2"], "-", 
     SuperscriptBox["u1", "2"], "+", 
     SuperscriptBox["u2", "2"]}]]}], ";"}], "\[IndentingNewLine]", 
 RowBox[{
  RowBox[{
   RowBox[{"ru", "[", 
    RowBox[{
    "ro_", ",", "sigma1_", ",", "sigma2_", ",", "u11_", ",", "u12_", ",", 
     "u21_", ",", "u22_"}], "]"}], ":=", 
   RowBox[{"ro", " ", "sigma1", " ", 
    RowBox[{"sigma2", "/", 
     RowBox[{"(", 
      RowBox[{
       RowBox[{"su", "[", 
        RowBox[{"sigma1", ",", "u11", ",", "u12"}], "]"}], 
       RowBox[{"su", "[", 
        RowBox[{"sigma2", ",", "u21", ",", "u22"}], "]"}]}], ")"}]}]}]}], 
  ";"}], "\[IndentingNewLine]", 
 RowBox[{
  RowBox[{
   RowBox[{"m", "[", "l_", "]"}], ":=", 
   RowBox[{"Mean", "[", "l", "]"}]}], ";"}], "\n", 
 RowBox[{
  RowBox[{
   RowBox[{"s", "[", "l_", "]"}], ":=", 
   RowBox[{"StandardDeviation", "[", "l", "]"}]}], ";"}], "\n", 
 RowBox[{
  RowBox[{
   RowBox[{"c", "[", 
    RowBox[{"l1_", ",", "l2_"}], "]"}], ":=", 
   RowBox[{"Correlation", "[", 
    RowBox[{"l1", ",", "l2"}], "]"}]}], ";"}], "\[IndentingNewLine]", 
 RowBox[{
  RowBox[{
   RowBox[{"logNormalDistribution", "[", 
    RowBox[{"\[Mu]_", ",", "\[Sigma]_"}], "]"}], ":=", 
   RowBox[{"LogNormalDistribution", "[", 
    RowBox[{
     RowBox[{
      FractionBox["1", "2"], " ", 
      RowBox[{"(", 
       RowBox[{
        RowBox[{"2", " ", 
         RowBox[{"Log", "[", "\[Mu]", "]"}]}], "-", 
        RowBox[{"Log", "[", 
         FractionBox[
          RowBox[{
           SuperscriptBox["\[Mu]", "2"], "+", 
           SuperscriptBox["\[Sigma]", "2"]}], 
          SuperscriptBox["\[Mu]", "2"]], "]"}]}], ")"}]}], ",", 
     SqrtBox[
      RowBox[{"Log", "[", 
       FractionBox[
        RowBox[{
         SuperscriptBox["\[Mu]", "2"], "+", 
         SuperscriptBox["\[Sigma]", "2"]}], 
        SuperscriptBox["\[Mu]", "2"]], "]"}]]}], "]"}]}], ";"}], "\n", 
 RowBox[{
  RowBox[{
   RowBox[{"gammaDistribution", "[", 
    RowBox[{"\[Mu]_", ",", "\[Sigma]_"}], "]"}], ":=", 
   RowBox[{"GammaDistribution", "[", 
    RowBox[{
     RowBox[{
      SuperscriptBox["\[Mu]", "2"], "/", 
      SuperscriptBox["\[Sigma]", "2"]}], ",", 
     RowBox[{
      SuperscriptBox["\[Sigma]", "2"], "/", "\[Mu]"}]}], "]"}]}], 
  ";"}], "\[IndentingNewLine]", 
 RowBox[{
  RowBox[{
   RowBox[{"biNormalDistribution", "[", 
    RowBox[{
    "\[Mu]X_", ",", "\[Sigma]X_", ",", "\[Mu]Y_", ",", "\[Sigma]Y_", ",", 
     "\[Rho]_"}], "]"}], ":=", 
   RowBox[{"BinormalDistribution", "[", 
    RowBox[{
     RowBox[{"{", 
      RowBox[{"\[Mu]X", ",", "\[Mu]Y"}], "}"}], ",", 
     RowBox[{"{", 
      RowBox[{"\[Sigma]X", ",", "\[Sigma]Y"}], "}"}], ",", "\[Rho]"}], 
    "]"}]}], ";"}], "\[IndentingNewLine]", 
 RowBox[{
  RowBox[{
   RowBox[{"biLogNormalDistribution", "[", 
    RowBox[{
    "\[Mu]X_", ",", "\[Sigma]X_", ",", "\[Mu]Y_", ",", "\[Sigma]Y_", ",", 
     "\[Rho]_"}], "]"}], ":=", 
   RowBox[{"LogMultinormalDistribution", "[", 
    RowBox[{
     RowBox[{"{", 
      RowBox[{
       RowBox[{
        FractionBox["1", "2"], " ", 
        RowBox[{"(", 
         RowBox[{
          RowBox[{"2", " ", 
           RowBox[{"Log", "[", "\[Mu]X", "]"}]}], "-", 
          RowBox[{"Log", "[", 
           FractionBox[
            RowBox[{
             SuperscriptBox["\[Mu]X", "2"], "+", 
             SuperscriptBox["\[Sigma]X", "2"]}], 
            SuperscriptBox["\[Mu]X", "2"]], "]"}]}], ")"}]}], ",", 
       RowBox[{
        FractionBox["1", "2"], " ", 
        RowBox[{"(", 
         RowBox[{
          RowBox[{"2", " ", 
           RowBox[{"Log", "[", "\[Mu]Y", "]"}]}], "-", 
          RowBox[{"Log", "[", 
           FractionBox[
            RowBox[{
             SuperscriptBox["\[Mu]Y", "2"], "+", 
             SuperscriptBox["\[Sigma]Y", "2"]}], 
            SuperscriptBox["\[Mu]Y", "2"]], "]"}]}], ")"}]}]}], "}"}], ",", 
     RowBox[{"{", 
      RowBox[{
       RowBox[{"{", 
        RowBox[{
         RowBox[{"Log", "[", 
          FractionBox[
           RowBox[{
            SuperscriptBox["\[Mu]X", "2"], "+", 
            SuperscriptBox["\[Sigma]X", "2"]}], 
           SuperscriptBox["\[Mu]X", "2"]], "]"}], ",", 
         RowBox[{
          FractionBox["1", 
           RowBox[{"\[Sigma]X", " ", "\[Sigma]Y"}]], 
          RowBox[{"(", 
           RowBox[{
            RowBox[{"-", "1"}], "+", 
            SuperscriptBox["\[ExponentialE]", 
             RowBox[{"\[Rho]", " ", 
              SqrtBox[
               RowBox[{
                RowBox[{"Log", "[", 
                 RowBox[{"1", "+", 
                  FractionBox[
                   SuperscriptBox["\[Sigma]X", "2"], 
                   SuperscriptBox["\[Mu]X", "2"]]}], "]"}], " ", 
                RowBox[{"Log", "[", 
                 RowBox[{"1", "+", 
                  FractionBox[
                   SuperscriptBox["\[Sigma]Y", "2"], 
                   SuperscriptBox["\[Mu]Y", "2"]]}], "]"}]}]]}]]}], ")"}], 
          " ", "\[Mu]X", " ", "\[Mu]Y", " ", 
          SqrtBox[
           RowBox[{"Log", "[", 
            FractionBox[
             RowBox[{
              SuperscriptBox["\[Mu]X", "2"], "+", 
              SuperscriptBox["\[Sigma]X", "2"]}], 
             SuperscriptBox["\[Mu]X", "2"]], "]"}]], " ", 
          SqrtBox[
           RowBox[{"Log", "[", 
            FractionBox[
             RowBox[{
              SuperscriptBox["\[Mu]Y", "2"], "+", 
              SuperscriptBox["\[Sigma]Y", "2"]}], 
             SuperscriptBox["\[Mu]Y", "2"]], "]"}]]}]}], "}"}], ",", 
       RowBox[{"{", 
        RowBox[{
         RowBox[{
          FractionBox["1", 
           RowBox[{"\[Sigma]X", " ", "\[Sigma]Y"}]], 
          RowBox[{"(", 
           RowBox[{
            RowBox[{"-", "1"}], "+", 
            SuperscriptBox["\[ExponentialE]", 
             RowBox[{"\[Rho]", " ", 
              SqrtBox[
               RowBox[{
                RowBox[{"Log", "[", 
                 RowBox[{"1", "+", 
                  FractionBox[
                   SuperscriptBox["\[Sigma]X", "2"], 
                   SuperscriptBox["\[Mu]X", "2"]]}], "]"}], " ", 
                RowBox[{"Log", "[", 
                 RowBox[{"1", "+", 
                  FractionBox[
                   SuperscriptBox["\[Sigma]Y", "2"], 
                   SuperscriptBox["\[Mu]Y", "2"]]}], "]"}]}]]}]]}], ")"}], 
          " ", "\[Mu]X", " ", "\[Mu]Y", " ", 
          SqrtBox[
           RowBox[{"Log", "[", 
            FractionBox[
             RowBox[{
              SuperscriptBox["\[Mu]X", "2"], "+", 
              SuperscriptBox["\[Sigma]X", "2"]}], 
             SuperscriptBox["\[Mu]X", "2"]], "]"}]], " ", 
          SqrtBox[
           RowBox[{"Log", "[", 
            FractionBox[
             RowBox[{
              SuperscriptBox["\[Mu]Y", "2"], "+", 
              SuperscriptBox["\[Sigma]Y", "2"]}], 
             SuperscriptBox["\[Mu]Y", "2"]], "]"}]]}], ",", 
         RowBox[{"Log", "[", 
          FractionBox[
           RowBox[{
            SuperscriptBox["\[Mu]Y", "2"], "+", 
            SuperscriptBox["\[Sigma]Y", "2"]}], 
           SuperscriptBox["\[Mu]Y", "2"]], "]"}]}], "}"}]}], "}"}]}], "]"}]}],
   ";"}], "\n", 
 RowBox[{
  RowBox[{
   RowBox[{"biGammaDistribution", "[", 
    RowBox[{
    "\[Mu]X_", ",", "\[Sigma]X_", ",", "\[Mu]Y_", ",", "\[Sigma]Y_", ",", 
     "\[Rho]_"}], "]"}], ":=", 
   RowBox[{"CopulaDistribution", "[", 
    RowBox[{
     RowBox[{"{", 
      RowBox[{"\"\<Binormal\>\"", ",", "\[Rho]"}], "}"}], ",", 
     RowBox[{"{", 
      RowBox[{
       RowBox[{"GammaDistribution", "[", 
        RowBox[{
         RowBox[{
          SuperscriptBox["\[Mu]X", "2"], "/", 
          SuperscriptBox["\[Sigma]X", "2"]}], ",", 
         RowBox[{
          SuperscriptBox["\[Sigma]X", "2"], "/", "\[Mu]X"}]}], "]"}], ",", 
       RowBox[{"GammaDistribution", "[", 
        RowBox[{
         RowBox[{
          SuperscriptBox["\[Mu]Y", "2"], "/", 
          SuperscriptBox["\[Sigma]Y", "2"]}], ",", 
         RowBox[{
          SuperscriptBox["\[Sigma]Y", "2"], "/", "\[Mu]Y"}]}], "]"}]}], 
      "}"}]}], "]"}]}], ";"}], "\[IndentingNewLine]", 
 RowBox[{
  RowBox[{
   RowBox[{"biVariateDistribution", "[", 
    RowBox[{
    "\[Mu]X_", ",", "\[Sigma]X_", ",", "\[Mu]Y_", ",", "\[Sigma]Y_", ",", 
     "\[Rho]_", ",", "distX_", ",", "distY_"}], "]"}], ":=", 
   "\[IndentingNewLine]", 
   RowBox[{"Switch", "[", 
    RowBox[{
    "distX", ",", "\[IndentingNewLine]", "\"\<normal\>\"", ",", 
     "\[IndentingNewLine]", 
     RowBox[{"Switch", "[", 
      RowBox[{"distY", ",", "\"\<normal\>\"", ",", 
       RowBox[{"BinormalDistribution", "[", 
        RowBox[{
         RowBox[{"{", 
          RowBox[{"\[Mu]X", ",", "\[Mu]Y"}], "}"}], ",", 
         RowBox[{"{", 
          RowBox[{"\[Sigma]X", ",", "\[Sigma]Y"}], "}"}], ",", "\[Rho]"}], 
        "]"}], ",", "\"\<lognormal\>\"", ",", 
       RowBox[{"CopulaDistribution", "[", 
        RowBox[{
         RowBox[{"{", 
          RowBox[{"\"\<Binormal\>\"", ",", 
           FractionBox[
            RowBox[{"\[Rho]", " ", "\[Sigma]Y"}], 
            RowBox[{"\[Mu]Y", " ", 
             SqrtBox[
              RowBox[{"Log", "[", 
               RowBox[{"1", "+", 
                FractionBox[
                 SuperscriptBox["\[Sigma]Y", "2"], 
                 SuperscriptBox["\[Mu]Y", "2"]]}], "]"}]]}]]}], "}"}], ",", 
         RowBox[{"{", 
          RowBox[{
           RowBox[{"NormalDistribution", "[", 
            RowBox[{"\[Mu]X", ",", "\[Sigma]X"}], "]"}], ",", 
           RowBox[{"LogNormalDistribution", "[", 
            RowBox[{
             RowBox[{
              FractionBox["1", "2"], " ", 
              RowBox[{"(", 
               RowBox[{
                RowBox[{"2", " ", 
                 RowBox[{"Log", "[", "\[Mu]Y", "]"}]}], "-", 
                RowBox[{"Log", "[", 
                 FractionBox[
                  RowBox[{
                   SuperscriptBox["\[Mu]Y", "2"], "+", 
                   SuperscriptBox["\[Sigma]Y", "2"]}], 
                  SuperscriptBox["\[Mu]Y", "2"]], "]"}]}], ")"}]}], ",", 
             SqrtBox[
              RowBox[{"Log", "[", 
               FractionBox[
                RowBox[{
                 SuperscriptBox["\[Mu]Y", "2"], "+", 
                 SuperscriptBox["\[Sigma]Y", "2"]}], 
                SuperscriptBox["\[Mu]Y", "2"]], "]"}]]}], "]"}]}], "}"}]}], 
        "]"}], ",", "\"\<gamma\>\"", ",", 
       RowBox[{"CopulaDistribution", "[", 
        RowBox[{
         RowBox[{"{", 
          RowBox[{"\"\<Binormal\>\"", ",", "\[Rho]"}], "}"}], ",", 
         RowBox[{"{", 
          RowBox[{
           RowBox[{"NormalDistribution", "[", 
            RowBox[{"\[Mu]X", ",", "\[Sigma]X"}], "]"}], ",", 
           RowBox[{"GammaDistribution", "[", 
            RowBox[{
             RowBox[{
              SuperscriptBox["\[Mu]Y", "2"], "/", 
              SuperscriptBox["\[Sigma]Y", "2"]}], ",", 
             RowBox[{
              SuperscriptBox["\[Sigma]Y", "2"], "/", "\[Mu]Y"}]}], "]"}]}], 
          "}"}]}], "]"}]}], "]"}], ",", "\[IndentingNewLine]", 
     "\"\<lognormal\>\"", ",", 
     RowBox[{"Switch", "[", 
      RowBox[{"distY", ",", "\"\<normal\>\"", ",", 
       RowBox[{"CopulaDistribution", "[", 
        RowBox[{
         RowBox[{"{", 
          RowBox[{"\"\<Binormal\>\"", ",", 
           FractionBox[
            RowBox[{"\[Rho]", " ", "\[Sigma]X"}], 
            RowBox[{"\[Mu]X", " ", 
             SqrtBox[
              RowBox[{"Log", "[", 
               RowBox[{"1", "+", 
                FractionBox[
                 SuperscriptBox["\[Sigma]X", "2"], 
                 SuperscriptBox["\[Mu]X", "2"]]}], "]"}]]}]]}], "}"}], ",", 
         RowBox[{"{", 
          RowBox[{
           RowBox[{"LogNormalDistribution", "[", 
            RowBox[{
             RowBox[{
              FractionBox["1", "2"], " ", 
              RowBox[{"(", 
               RowBox[{
                RowBox[{"2", " ", 
                 RowBox[{"Log", "[", "\[Mu]X", "]"}]}], "-", 
                RowBox[{"Log", "[", 
                 FractionBox[
                  RowBox[{
                   SuperscriptBox["\[Mu]X", "2"], "+", 
                   SuperscriptBox["\[Sigma]X", "2"]}], 
                  SuperscriptBox["\[Mu]X", "2"]], "]"}]}], ")"}]}], ",", 
             SqrtBox[
              RowBox[{"Log", "[", 
               FractionBox[
                RowBox[{
                 SuperscriptBox["\[Mu]X", "2"], "+", 
                 SuperscriptBox["\[Sigma]X", "2"]}], 
                SuperscriptBox["\[Mu]X", "2"]], "]"}]]}], "]"}], ",", 
           RowBox[{"NormalDistribution", "[", 
            RowBox[{"\[Mu]Y", ",", "\[Sigma]Y"}], "]"}]}], "}"}]}], "]"}], 
       ",", "\"\<lognormal\>\"", ",", 
       RowBox[{"biLogNormalDistribution", "[", 
        RowBox[{
        "\[Mu]X", ",", "\[Sigma]X", ",", "\[Mu]Y", ",", "\[Sigma]Y", ",", 
         "\[Rho]"}], "]"}], ",", "\"\<gamma\>\"", ",", 
       RowBox[{"CopulaDistribution", "[", 
        RowBox[{
         RowBox[{"{", 
          RowBox[{"\"\<Binormal\>\"", ",", 
           FractionBox[
            RowBox[{"\[Rho]", " ", "\[Sigma]X"}], 
            RowBox[{"\[Mu]X", " ", 
             SqrtBox[
              RowBox[{"Log", "[", 
               RowBox[{"1", "+", 
                FractionBox[
                 SuperscriptBox["\[Sigma]X", "2"], 
                 SuperscriptBox["\[Mu]X", "2"]]}], "]"}]]}]]}], "}"}], ",", 
         RowBox[{"{", 
          RowBox[{
           RowBox[{"LogNormalDistribution", "[", 
            RowBox[{
             RowBox[{
              FractionBox["1", "2"], " ", 
              RowBox[{"(", 
               RowBox[{
                RowBox[{"2", " ", 
                 RowBox[{"Log", "[", "\[Mu]X", "]"}]}], "-", 
                RowBox[{"Log", "[", 
                 FractionBox[
                  RowBox[{
                   SuperscriptBox["\[Mu]X", "2"], "+", 
                   SuperscriptBox["\[Sigma]X", "2"]}], 
                  SuperscriptBox["\[Mu]X", "2"]], "]"}]}], ")"}]}], ",", 
             SqrtBox[
              RowBox[{"Log", "[", 
               FractionBox[
                RowBox[{
                 SuperscriptBox["\[Mu]X", "2"], "+", 
                 SuperscriptBox["\[Sigma]X", "2"]}], 
                SuperscriptBox["\[Mu]X", "2"]], "]"}]]}], "]"}], ",", 
           RowBox[{"GammaDistribution", "[", 
            RowBox[{
             RowBox[{
              SuperscriptBox["\[Mu]Y", "2"], "/", 
              SuperscriptBox["\[Sigma]Y", "2"]}], ",", 
             RowBox[{
              SuperscriptBox["\[Sigma]Y", "2"], "/", "\[Mu]Y"}]}], "]"}]}], 
          "}"}]}], "]"}]}], "]"}], ",", "\[IndentingNewLine]", 
     "\"\<gamma\>\"", ",", "\[IndentingNewLine]", 
     RowBox[{"Switch", "[", 
      RowBox[{"distY", ",", "\"\<normal\>\"", ",", 
       RowBox[{"CopulaDistribution", "[", 
        RowBox[{
         RowBox[{"{", 
          RowBox[{"\"\<Binormal\>\"", ",", "\[Rho]"}], "}"}], ",", 
         RowBox[{"{", 
          RowBox[{
           RowBox[{"GammaDistribution", "[", 
            RowBox[{
             RowBox[{
              SuperscriptBox["\[Mu]X", "2"], "/", 
              SuperscriptBox["\[Sigma]X", "2"]}], ",", 
             RowBox[{
              SuperscriptBox["\[Sigma]X", "2"], "/", "\[Mu]X"}]}], "]"}], ",", 
           RowBox[{"NormalDistribution", "[", 
            RowBox[{"\[Mu]Y", ",", "\[Sigma]Y"}], "]"}]}], "}"}]}], "]"}], 
       ",", "\"\<lognormal\>\"", ",", 
       RowBox[{"CopulaDistribution", "[", 
        RowBox[{
         RowBox[{"{", 
          RowBox[{"\"\<Binormal\>\"", ",", 
           FractionBox[
            RowBox[{"\[Rho]", " ", "\[Sigma]Y"}], 
            RowBox[{"\[Mu]Y", " ", 
             SqrtBox[
              RowBox[{"Log", "[", 
               RowBox[{"1", "+", 
                FractionBox[
                 SuperscriptBox["\[Sigma]Y", "2"], 
                 SuperscriptBox["\[Mu]Y", "2"]]}], "]"}]]}]]}], "}"}], ",", 
         RowBox[{"{", 
          RowBox[{
           RowBox[{"GammaDistribution", "[", 
            RowBox[{
             RowBox[{
              SuperscriptBox["\[Mu]X", "2"], "/", 
              SuperscriptBox["\[Sigma]X", "2"]}], ",", 
             RowBox[{
              SuperscriptBox["\[Sigma]X", "2"], "/", "\[Mu]X"}]}], "]"}], ",", 
           RowBox[{"LogNormalDistribution", "[", 
            RowBox[{
             RowBox[{
              FractionBox["1", "2"], " ", 
              RowBox[{"(", 
               RowBox[{
                RowBox[{"2", " ", 
                 RowBox[{"Log", "[", "\[Mu]Y", "]"}]}], "-", 
                RowBox[{"Log", "[", 
                 FractionBox[
                  RowBox[{
                   SuperscriptBox["\[Mu]Y", "2"], "+", 
                   SuperscriptBox["\[Sigma]Y", "2"]}], 
                  SuperscriptBox["\[Mu]Y", "2"]], "]"}]}], ")"}]}], ",", 
             SqrtBox[
              RowBox[{"Log", "[", 
               FractionBox[
                RowBox[{
                 SuperscriptBox["\[Mu]Y", "2"], "+", 
                 SuperscriptBox["\[Sigma]Y", "2"]}], 
                SuperscriptBox["\[Mu]Y", "2"]], "]"}]]}], "]"}]}], "}"}]}], 
        "]"}], ",", "\"\<gamma\>\"", ",", 
       RowBox[{"biGammaDistribution", "[", 
        RowBox[{
        "\[Mu]X", ",", "\[Sigma]X", ",", "\[Mu]Y", ",", "\[Sigma]Y", ",", 
         "\[Rho]"}], "]"}]}], "]"}]}], "]"}]}], ";"}], "\[IndentingNewLine]", 
 RowBox[{
  RowBox[{
   RowBox[{"ll", "[", 
    RowBox[{"d_", ",", "dist_"}], "]"}], ":=", 
   RowBox[{"Quiet", "[", 
    RowBox[{"LogLikelihood", "[", 
     RowBox[{"dist", ",", "d"}], "]"}], "]"}]}], ";"}], "\[IndentingNewLine]", 
 RowBox[{
  RowBox[{
   RowBox[{"pp", "[", 
    RowBox[{"x_", ",", "vd_", ",", "dd_", ",", "dnd_"}], "]"}], ":=", 
   RowBox[{"Quiet", "[", 
    RowBox[{"Module", "[", 
     RowBox[{
      RowBox[{"{", 
       RowBox[{
       "likelihoodDiseased", ",", "likelihoodNonDiseased", ",", "evidence"}], 
       "}"}], ",", "\[IndentingNewLine]", 
      RowBox[{
       RowBox[{"likelihoodDiseased", "=", 
        RowBox[{"PDF", "[", 
         RowBox[{"dd", ",", "x"}], "]"}]}], ";", "\[IndentingNewLine]", 
       RowBox[{"likelihoodNonDiseased", "=", 
        RowBox[{"PDF", "[", 
         RowBox[{"dnd", ",", "x"}], "]"}]}], ";", "\[IndentingNewLine]", 
       RowBox[{"evidence", "=", 
        RowBox[{
         RowBox[{"likelihoodDiseased", "*", "vd"}], "+", 
         RowBox[{"likelihoodNonDiseased", "*", 
          RowBox[{"(", 
           RowBox[{"1", "-", "vd"}], ")"}]}]}]}], ";", "\[IndentingNewLine]", 
       RowBox[{"likelihoodDiseased", "*", 
        RowBox[{"vd", "/", "evidence"}]}]}]}], "]"}], "]"}]}], 
  ";"}], "\[IndentingNewLine]", 
 RowBox[{
  RowBox[{
   RowBox[{"pp", "[", 
    RowBox[{"x1_", ",", "x2_", ",", "vd_", ",", "dd_", ",", "dnd_"}], "]"}], ":=", 
   RowBox[{"Quiet", "[", 
    RowBox[{"Module", "[", 
     RowBox[{
      RowBox[{"{", 
       RowBox[{
       "likelihoodDiseased", ",", "likelihoodNonDiseased", ",", "evidence"}], 
       "}"}], ",", "\n", "\t", 
      RowBox[{
       RowBox[{"likelihoodDiseased", "=", 
        RowBox[{"PDF", "[", 
         RowBox[{"dd", ",", 
          RowBox[{"{", 
           RowBox[{"x1", ",", "x2"}], "}"}]}], "]"}]}], ";", 
       "\[IndentingNewLine]", 
       RowBox[{"likelihoodNonDiseased", "=", 
        RowBox[{"PDF", "[", 
         RowBox[{"dnd", ",", 
          RowBox[{"{", 
           RowBox[{"x1", ",", "x2"}], "}"}]}], "]"}]}], ";", 
       "\[IndentingNewLine]", 
       RowBox[{"evidence", "=", 
        RowBox[{
         RowBox[{"likelihoodDiseased", "*", "vd"}], "+", 
         RowBox[{"likelihoodNonDiseased", "*", 
          RowBox[{"(", 
           RowBox[{"1", "-", "vd"}], ")"}]}]}]}], ";", 
       RowBox[{"likelihoodDiseased", "*", 
        RowBox[{"vd", "/", "evidence"}]}]}]}], "]"}], "]"}]}], 
  ";"}], "\[IndentingNewLine]", 
 RowBox[{
  RowBox[{
   RowBox[{"pp", "[", 
    RowBox[{
    "x_", ",", "vd_", ",", "m1_", ",", "s1_", ",", "m2_", ",", "s2_", ",", 
     "dist1_", ",", "dist2_"}], "]"}], ":=", 
   RowBox[{"Module", "[", 
    RowBox[{
     RowBox[{"{", 
      RowBox[{
      "diseasedDist", ",", "nondiseasedDist", ",", "likelihoodDiseased", ",", 
       "likelihoodNonDiseased", ",", "evidence"}], "}"}], ",", 
     "\[IndentingNewLine]", 
     RowBox[{
      RowBox[{"likelihoodDiseased", "=", 
       RowBox[{"Switch", "[", 
        RowBox[{"dist1", ",", "\"\<normal\>\"", ",", 
         RowBox[{"N", "[", 
          RowBox[{"PDF", "[", 
           RowBox[{
            RowBox[{"NormalDistribution", "[", 
             RowBox[{"m1", ",", "s1"}], "]"}], ",", "x"}], "]"}], "]"}], ",", 
         "\"\<lognormal\>\"", ",", 
         RowBox[{"N", "[", 
          RowBox[{"PDF", "[", 
           RowBox[{
            RowBox[{"logNormalDistribution", "[", 
             RowBox[{"m1", ",", "s1"}], "]"}], ",", "x"}], "]"}], "]"}], ",", 
         "\"\<gamma\>\"", ",", 
         RowBox[{"N", "[", 
          RowBox[{"PDF", "[", 
           RowBox[{
            RowBox[{"gammaDistribution", "[", 
             RowBox[{"m1", ",", "s1"}], "]"}], ",", "x"}], "]"}], "]"}]}], 
        "]"}]}], ";", "\[IndentingNewLine]", 
      RowBox[{"likelihoodNonDiseased", "=", 
       RowBox[{"Switch", "[", 
        RowBox[{"dist2", ",", "\"\<normal\>\"", ",", 
         RowBox[{"N", "[", 
          RowBox[{"PDF", "[", 
           RowBox[{
            RowBox[{"NormalDistribution", "[", 
             RowBox[{"m2", ",", "s2"}], "]"}], ",", "x"}], "]"}], "]"}], ",", 
         "\"\<lognormal\>\"", ",", 
         RowBox[{"N", "[", 
          RowBox[{"PDF", "[", 
           RowBox[{
            RowBox[{"logNormalDistribution", "[", 
             RowBox[{"m2", ",", "s2"}], "]"}], ",", "x"}], "]"}], "]"}], ",", 
         "\"\<gamma\>\"", ",", 
         RowBox[{"N", "[", 
          RowBox[{"PDF", "[", 
           RowBox[{
            RowBox[{"gammaDistribution", "[", 
             RowBox[{"m2", ",", "s2"}], "]"}], ",", "x"}], "]"}], "]"}]}], 
        "]"}]}], ";", "\[IndentingNewLine]", 
      RowBox[{"evidence", "=", 
       RowBox[{
        RowBox[{"likelihoodDiseased", "*", "vd"}], "+", 
        RowBox[{"likelihoodNonDiseased", "*", 
         RowBox[{"(", 
          RowBox[{"1", "-", "vd"}], ")"}]}]}]}], ";", "\[IndentingNewLine]", 
      RowBox[{"likelihoodDiseased", "*", 
       RowBox[{"vd", "/", "evidence"}]}]}]}], "]"}]}], 
  ";"}], "\[IndentingNewLine]", 
 RowBox[{
  RowBox[{
   RowBox[{"pp", "[", 
    RowBox[{
    "x1_", ",", "x2_", ",", "vd_", ",", "m11_", ",", "s11_", ",", "m12_", ",",
      "s12_", ",", "m21_", ",", "s21_", ",", "m22_", ",", "s22_", ",", "cc1_",
      ",", "cc2_", ",", "dist11_", ",", "dist12_", ",", "dist21_", ",", 
     "dist22_"}], "]"}], ":=", 
   RowBox[{"Module", "[", 
    RowBox[{
     RowBox[{"{", 
      RowBox[{
      "likelihoodDiseased", ",", "likelihoodNonDiseased", ",", "evidence"}], 
      "}"}], ",", "\n", "\t", 
     RowBox[{
      RowBox[{"likelihoodDiseased", "=", 
       RowBox[{"N", "[", 
        RowBox[{"PDF", "[", 
         RowBox[{
          RowBox[{"biVariateDistribution", "[", 
           RowBox[{
           "m11", ",", "s11", ",", "m21", ",", "s21", ",", "cc1", ",", 
            "dist11", ",", "dist21"}], "]"}], ",", 
          RowBox[{"{", 
           RowBox[{"x1", ",", "x2"}], "}"}]}], "]"}], "]"}]}], ";", 
      "\[IndentingNewLine]", 
      RowBox[{"likelihoodNonDiseased", "=", 
       RowBox[{"N", "[", 
        RowBox[{"PDF", "[", 
         RowBox[{
          RowBox[{"biVariateDistribution", "[", 
           RowBox[{
           "m12", ",", "s12", ",", "m22", ",", "s22", ",", "cc2", ",", 
            "dist12", ",", "dist22"}], "]"}], ",", 
          RowBox[{"{", 
           RowBox[{"x1", ",", "x2"}], "}"}]}], "]"}], "]"}]}], ";", 
      "\[IndentingNewLine]", 
      RowBox[{"evidence", "=", 
       RowBox[{
        RowBox[{"likelihoodDiseased", "*", "vd"}], "+", 
        RowBox[{"likelihoodNonDiseased", "*", 
         RowBox[{"(", 
          RowBox[{"1", "-", "vd"}], ")"}]}]}]}], ";", "\[IndentingNewLine]", 
      RowBox[{"likelihoodDiseased", "*", 
       RowBox[{"vd", "/", "evidence"}]}]}]}], "]"}]}], 
  ";"}], "\[IndentingNewLine]", 
 RowBox[{
  RowBox[{
   RowBox[{"cpp1", "[", 
    RowBox[{
    "vd_", ",", "m11_", ",", "s11_", ",", "m12_", ",", "s12_", ",", "m21_", 
     ",", "s21_", ",", "m22_", ",", "s22_", ",", "cc1_", ",", "cc2_", ",", 
     "dist111_", ",", "dist121_", ",", "dist211_", ",", "dist221_", ",", 
     "dist112_", ",", "dist122_", ",", "dist212_", ",", "dist222_", ",", 
     "msr_", ",", "val_"}], "]"}], ":=", "\[IndentingNewLine]", 
   RowBox[{"Quiet", "[", 
    RowBox[{"Switch", "[", 
     RowBox[{"val", ",", "1", ",", "\[IndentingNewLine]", 
      RowBox[{"Switch", "[", 
       RowBox[{"msr", ",", "1", ",", "\[IndentingNewLine]", 
        RowBox[{"Plot", "[", 
         RowBox[{
          RowBox[{"{", 
           RowBox[{
            RowBox[{"pp", "[", 
             RowBox[{
             "x", ",", "vd", ",", "m11", ",", "s11", ",", "m12", ",", "s12", 
              ",", "dist111", ",", "dist121"}], "]"}], ",", 
            RowBox[{"pp", "[", 
             RowBox[{
             "x", ",", "vd", ",", "m11", ",", "s11", ",", "m12", ",", "s12", 
              ",", "dist112", ",", "dist122"}], "]"}]}], "}"}], ",", 
          RowBox[{"{", 
           RowBox[{"x", ",", " ", 
            RowBox[{"Max", "[", 
             RowBox[{
              RowBox[{"m11", "-", 
               RowBox[{"2", "s11"}]}], ",", "0"}], "]"}], ",", 
            RowBox[{"m11", "+", 
             RowBox[{"2", "s11"}]}]}], "}"}], ",", 
          RowBox[{"PlotRange", "->", "All"}], ",", 
          RowBox[{"AxesLabel", "->", 
           RowBox[{"{", 
            RowBox[{"\"\<1st measurand\>\"", ",", "\"\<P(disease)\>\""}], 
            "}"}]}], ",", 
          RowBox[{"PlotLegends", "->", 
           RowBox[{"Placed", "[", 
            RowBox[{
             RowBox[{"{", 
              RowBox[{
              "\"\<P(disease) of 1st set\>\"", ",", 
               "\"\<P(disease) of 2nd set \>\""}], "}"}], ",", "Bottom"}], 
            "]"}]}], ",", 
          RowBox[{
          "PlotLabel", "->", 
           "\"\<posterior probability for disease vs 1st measurand\>\""}], 
          ",", 
          RowBox[{"ImageSize", "->", "550"}], ",", 
          RowBox[{"PlotTheme", "->", "\"\<Scientific\>\""}], ",", 
          RowBox[{"Filling", "->", "Bottom"}]}], "]"}], ",", "2", ",", 
        "\[IndentingNewLine]", 
        RowBox[{"Plot", "[", 
         RowBox[{
          RowBox[{"{", 
           RowBox[{
            RowBox[{"pp", "[", 
             RowBox[{
             "x", ",", "vd", ",", "m21", ",", "s21", ",", "m22", ",", "s22", 
              ",", "dist211", ",", "dist221"}], "]"}], ",", 
            RowBox[{"pp", "[", 
             RowBox[{
             "x", ",", "vd", ",", "m21", ",", "s21", ",", "m22", ",", "s22", 
              ",", "dist212", ",", "dist222"}], "]"}]}], "}"}], ",", 
          RowBox[{"{", 
           RowBox[{"x", ",", " ", 
            RowBox[{"Max", "[", 
             RowBox[{
              RowBox[{"m21", "-", 
               RowBox[{"2", "s21"}]}], ",", "0"}], "]"}], ",", " ", 
            RowBox[{"m21", "+", 
             RowBox[{"2", "s21"}]}]}], "}"}], ",", 
          RowBox[{"PlotRange", "->", "All"}], ",", 
          RowBox[{"AxesLabel", "->", 
           RowBox[{"{", 
            RowBox[{"\"\<2nd measurand\>\"", ",", "\"\<P(disease)\>\""}], 
            "}"}]}], ",", 
          RowBox[{"PlotLegends", "->", 
           RowBox[{"Placed", "[", 
            RowBox[{
             RowBox[{"{", 
              RowBox[{
              "\"\<P(disease) of 1st set\>\"", ",", 
               "\"\<P(disease) of 2nd set \>\""}], "}"}], ",", "Bottom"}], 
            "]"}]}], ",", 
          RowBox[{
          "PlotLabel", "->", 
           "\"\<posterior probability for disease vs 2nd measurand\>\""}], 
          ",", 
          RowBox[{"ImageSize", "->", "550"}], ",", 
          RowBox[{"PlotTheme", "->", "\"\<Scientific\>\""}], ",", 
          RowBox[{"Filling", "->", "Bottom"}]}], "]"}], ",", "3", ",", 
        "\[IndentingNewLine]", 
        RowBox[{"Plot3D", "[", 
         RowBox[{
          RowBox[{"{", 
           RowBox[{
            RowBox[{"pp", "[", 
             RowBox[{
             "x", ",", "y", ",", "vd", ",", "m11", ",", "s11", ",", "m12", 
              ",", "s12", ",", "m21", ",", "s21", ",", "m22", ",", "s22", ",",
               "cc1", ",", "cc2", ",", "dist111", ",", "dist121", ",", 
              "dist211", ",", "dist221"}], "]"}], ",", 
            RowBox[{"pp", "[", 
             RowBox[{
             "x", ",", "y", ",", "vd", ",", "m11", ",", "s11", ",", "m12", 
              ",", "s12", ",", "m21", ",", "s21", ",", "m22", ",", "s22", ",",
               "cc1", ",", "cc2", ",", "dist112", ",", "dist122", ",", 
              "dist212", ",", "dist222"}], "]"}]}], "}"}], ",", 
          RowBox[{"{", 
           RowBox[{"x", ",", " ", 
            RowBox[{"Max", "[", 
             RowBox[{
              RowBox[{"m11", "-", 
               RowBox[{"2", "s11"}]}], ",", "0"}], "]"}], ",", " ", 
            RowBox[{"m11", "+", 
             RowBox[{"2", "s11"}]}]}], "}"}], ",", 
          RowBox[{"{", 
           RowBox[{"y", ",", " ", 
            RowBox[{"Max", "[", 
             RowBox[{
              RowBox[{"m21", "-", 
               RowBox[{"2", "s21"}]}], ",", "0"}], "]"}], ",", " ", 
            RowBox[{"m21", "+", 
             RowBox[{"2", "s21"}]}]}], "}"}], ",", 
          RowBox[{"PlotRange", "->", "All"}], ",", " ", 
          RowBox[{"PlotPoints", "->", "100"}], ",", 
          RowBox[{"AxesLabel", "->", 
           RowBox[{"{", 
            RowBox[{
            "\"\<1st measurand\>\"", ",", "\"\< 2nd measurand\>\"", ",", 
             "\"\<P(disease)\>\""}], "}"}]}], ",", 
          RowBox[{"PlotLegends", "->", 
           RowBox[{"Placed", "[", 
            RowBox[{
             RowBox[{"{", 
              RowBox[{
              "\"\<P(disease) of 1st set\>\"", ",", 
               "\"\<P(disease) of 2nd set \>\""}], "}"}], ",", "Bottom"}], 
            "]"}]}], ",", 
          RowBox[{
          "PlotLabel", "->", 
           "\"\<posterior probability for disease vs 1st and 2nd measurands\>\
\""}], ",", 
          RowBox[{"ImageSize", "->", "550"}], ",", 
          RowBox[{"PlotTheme", "->", "\"\<Scientific\>\""}]}], "]"}]}], "]"}],
       ",", "\[IndentingNewLine]", "2", ",", "\[IndentingNewLine]", 
      RowBox[{"Switch", "[", 
       RowBox[{"msr", ",", "1", ",", "\[IndentingNewLine]", 
        RowBox[{"Plot", "[", 
         RowBox[{
          RowBox[{
           RowBox[{"-", 
            RowBox[{"pp", "[", 
             RowBox[{
             "x", ",", "vd", ",", "m11", ",", "s11", ",", "m12", ",", "s12", 
              ",", "dist111", ",", "dist121"}], "]"}]}], "+", 
           RowBox[{"pp", "[", 
            RowBox[{
            "x", ",", "vd", ",", "m11", ",", "s11", ",", "m12", ",", "s12", 
             ",", "dist112", ",", "dist122"}], "]"}]}], ",", 
          RowBox[{"{", 
           RowBox[{"x", ",", " ", 
            RowBox[{"Max", "[", 
             RowBox[{
              RowBox[{"m11", "-", 
               RowBox[{"2", "s11"}]}], ",", "0"}], "]"}], ",", 
            RowBox[{"m11", "+", 
             RowBox[{"2", "s11"}]}]}], "}"}], ",", 
          RowBox[{"PlotRange", "->", "All"}], ",", 
          RowBox[{"AxesLabel", "->", 
           RowBox[{"{", 
            RowBox[{
            "\"\<1st measurand\>\"", ",", 
             "\"\<\[CapitalDelta]P(disease)\>\""}], "}"}]}], ",", 
          RowBox[{"PlotLegends", "->", 
           RowBox[{"Placed", "[", 
            RowBox[{
             RowBox[{
             "{", "\"\<P(disease) of 2nd set -P(disease) of 1st set\>\"", 
              "}"}], ",", "Bottom"}], "]"}]}], ",", 
          RowBox[{
          "PlotLabel", "->", 
           "\"\<difference of posterior probabilities for disease vs 1st \
measurand\>\""}], ",", 
          RowBox[{"ImageSize", "->", "550"}], ",", 
          RowBox[{"PlotTheme", "->", "\"\<Scientific\>\""}], ",", 
          RowBox[{"Filling", "->", "Bottom"}]}], "]"}], ",", "2", ",", 
        "\[IndentingNewLine]", 
        RowBox[{"Plot", "[", 
         RowBox[{
          RowBox[{
           RowBox[{"-", 
            RowBox[{"pp", "[", 
             RowBox[{
             "x", ",", "vd", ",", "m21", ",", "s21", ",", "m22", ",", "s22", 
              ",", "dist211", ",", "dist221"}], "]"}]}], "+", 
           RowBox[{"pp", "[", 
            RowBox[{
            "x", ",", "vd", ",", "m21", ",", "s21", ",", "m22", ",", "s22", 
             ",", "dist212", ",", "dist222"}], "]"}]}], ",", 
          RowBox[{"{", 
           RowBox[{"x", ",", " ", 
            RowBox[{"Max", "[", 
             RowBox[{
              RowBox[{"m21", "-", 
               RowBox[{"2", "s21"}]}], ",", "0"}], "]"}], ",", 
            RowBox[{"m21", "+", 
             RowBox[{"2", "s21"}]}]}], "}"}], ",", 
          RowBox[{"PlotRange", "->", "All"}], ",", 
          RowBox[{"AxesLabel", "->", 
           RowBox[{"{", 
            RowBox[{
            "\"\<2nd measurand\>\"", ",", 
             "\"\<\[CapitalDelta]P(disease)\>\""}], "}"}]}], ",", 
          RowBox[{"PlotLegends", "->", 
           RowBox[{"Placed", "[", 
            RowBox[{
             RowBox[{
             "{", "\"\<P(disease) of 2nd set -P(disease) of 1st set\>\"", 
              "}"}], ",", "Bottom"}], "]"}]}], ",", 
          RowBox[{
          "PlotLabel", "->", 
           "\"\<difference of posterior probabilities for disease vs 2nd \
measurand\>\""}], ",", 
          RowBox[{"ImageSize", "->", "550"}], ",", 
          RowBox[{"PlotTheme", "->", "\"\<Scientific\>\""}], ",", 
          RowBox[{"Filling", "->", "Bottom"}]}], "]"}], ",", "3", ",", 
        "\[IndentingNewLine]", 
        RowBox[{"Plot3D", "[", 
         RowBox[{
          RowBox[{
           RowBox[{"-", 
            RowBox[{"pp", "[", 
             RowBox[{
             "x", ",", "y", ",", "vd", ",", "m11", ",", "s11", ",", "m12", 
              ",", "s12", ",", "m21", ",", "s21", ",", "m22", ",", "s22", ",",
               "cc1", ",", "cc2", ",", "dist111", ",", "dist121", ",", 
              "dist211", ",", "dist221"}], "]"}]}], "+", 
           RowBox[{"pp", "[", 
            RowBox[{
            "x", ",", "y", ",", "vd", ",", "m11", ",", "s11", ",", "m12", ",",
              "s12", ",", "m21", ",", "s21", ",", "m22", ",", "s22", ",", 
             "cc1", ",", "cc2", ",", "dist112", ",", "dist122", ",", 
             "dist212", ",", "dist222"}], "]"}]}], ",", 
          RowBox[{"{", 
           RowBox[{"x", ",", " ", 
            RowBox[{"Max", "[", 
             RowBox[{
              RowBox[{"m11", "-", 
               RowBox[{"2", "s11"}]}], ",", "0"}], "]"}], ",", 
            RowBox[{"m11", "+", 
             RowBox[{"2", "s11"}]}]}], "}"}], ",", 
          RowBox[{"{", 
           RowBox[{"y", ",", " ", 
            RowBox[{"Max", "[", 
             RowBox[{
              RowBox[{"m21", "-", 
               RowBox[{"2", "s21"}]}], ",", "0"}], "]"}], ",", 
            RowBox[{"m21", "+", 
             RowBox[{"2", "s21"}]}]}], "}"}], ",", 
          RowBox[{"PlotRange", "->", "All"}], ",", 
          RowBox[{"AxesLabel", "->", 
           RowBox[{"{", 
            RowBox[{
            "\"\<1st measurand\>\"", ",", "\"\< 2nd measurand\>\"", ",", 
             "\"\<\[CapitalDelta]P(disease)\>\""}], "}"}]}], ",", 
          RowBox[{"PlotLegends", "->", 
           RowBox[{"Placed", "[", 
            RowBox[{
             RowBox[{
             "{", "\"\<P(disease) of 2nd set -P(disease) of 1st set\>\"", 
              "}"}], ",", "Bottom"}], "]"}]}], ",", 
          RowBox[{
          "PlotLabel", "->", 
           "\"\<difference of posterior probabilities for disease vs 1st and \
2nd measurands\>\""}], ",", 
          RowBox[{"ImageSize", "->", "550"}], ",", 
          RowBox[{"PlotTheme", "->", "\"\<Scientific\>\""}]}], "]"}]}], 
       "]"}]}], "]"}], "]"}]}], ";"}], "\[IndentingNewLine]", 
 RowBox[{
  RowBox[{
   RowBox[{"cpp2", "[", 
    RowBox[{
    "vd_", ",", "dd11_", ",", "dd12_", ",", "dd21_", ",", "dd22_", ",", 
     "dd121_", ",", "dd122_", ",", "dnd11_", ",", "dnd12_", ",", "dnd21_", 
     ",", "dnd22_", ",", "dnd121_", ",", "dnd122_", ",", "msr_", ",", 
     "val_"}], "]"}], ":=", "\[IndentingNewLine]", 
   RowBox[{"Quiet", "[", 
    RowBox[{"Switch", "[", 
     RowBox[{"val", ",", "\[IndentingNewLine]", "1", ",", 
      RowBox[{"Switch", "[", 
       RowBox[{"msr", ",", "1", ",", "\[IndentingNewLine]", 
        RowBox[{"Plot", "[", 
         RowBox[{
          RowBox[{"{", 
           RowBox[{
            RowBox[{"pp", "[", 
             RowBox[{"x", ",", "vd", ",", "dd11", ",", "dnd11"}], "]"}], ",", 
            RowBox[{"pp", "[", 
             RowBox[{"x", ",", "vd", ",", "dd12", ",", "dnd12"}], "]"}]}], 
           "}"}], ",", 
          RowBox[{"{", 
           RowBox[{"x", ",", 
            RowBox[{"Max", "[", 
             RowBox[{
              RowBox[{
               RowBox[{"Min", "[", 
                RowBox[{
                 RowBox[{"Mean", "[", "dd11", "]"}], ",", 
                 RowBox[{"Mean", "[", "dd12", "]"}]}], "]"}], "-", 
               RowBox[{"2", 
                RowBox[{"Max", "[", 
                 RowBox[{
                  RowBox[{"StandardDeviation", "[", "dd11", "]"}], ",", 
                  RowBox[{"StandardDeviation", "[", "dd12", "]"}]}], 
                 "]"}]}]}], ",", "0"}], "]"}], ",", 
            RowBox[{
             RowBox[{"Max", "[", 
              RowBox[{
               RowBox[{"Mean", "[", "dd11", "]"}], ",", 
               RowBox[{"Mean", "[", "dd12", "]"}]}], "]"}], "+", 
             RowBox[{"2", 
              RowBox[{"Max", "[", 
               RowBox[{
                RowBox[{"StandardDeviation", "[", "dd11", "]"}], ",", 
                RowBox[{"StandardDeviation", "[", "dd12", "]"}]}], 
               "]"}]}]}]}], "}"}], ",", 
          RowBox[{"PlotRange", "->", "All"}], ",", 
          RowBox[{"ImageSize", "->", "550"}], ",", 
          RowBox[{"Exclusions", "\[Rule]", "None"}], ",", 
          RowBox[{"AxesLabel", "->", 
           RowBox[{"{", 
            RowBox[{"\"\<\>\"", ",", "\"\<P(disease)\>\""}], "}"}]}], ",", 
          RowBox[{"PlotLegends", "->", 
           RowBox[{"Placed", "[", 
            RowBox[{
             RowBox[{"{", 
              RowBox[{
              "\"\<P(disease) of 1st kernel\>\"", ",", 
               "\"\<P(disease) of 2nd kernel\>\""}], "}"}], ",", "Below"}], 
            "]"}]}], ",", 
          RowBox[{
          "PlotLabel", "->", 
           "\"\<posterior probability for disease vs 1st measurand\>\""}], 
          ",", 
          RowBox[{"PlotTheme", "->", "\"\<Scientific\>\""}], ",", 
          RowBox[{"Filling", "->", "Bottom"}]}], "]"}], ",", "2", ",", 
        "\[IndentingNewLine]", 
        RowBox[{"Plot", "[", 
         RowBox[{
          RowBox[{"{", 
           RowBox[{
            RowBox[{"pp", "[", 
             RowBox[{"x", ",", "vd", ",", "dd21", ",", "dnd21"}], "]"}], ",", 
            RowBox[{"pp", "[", 
             RowBox[{"x", ",", "vd", ",", "dd22", ",", "dnd22"}], "]"}]}], 
           "}"}], ",", 
          RowBox[{"{", 
           RowBox[{"x", ",", 
            RowBox[{"Max", "[", 
             RowBox[{
              RowBox[{
               RowBox[{"Min", "[", 
                RowBox[{
                 RowBox[{"Mean", "[", "dd21", "]"}], ",", 
                 RowBox[{"Mean", "[", "dd22", "]"}]}], "]"}], "-", 
               RowBox[{"2", 
                RowBox[{"Max", "[", 
                 RowBox[{
                  RowBox[{"StandardDeviation", "[", "dd21", "]"}], ",", 
                  RowBox[{"StandardDeviation", "[", "dd22", "]"}]}], 
                 "]"}]}]}], ",", "0"}], "]"}], ",", 
            RowBox[{
             RowBox[{"Max", "[", 
              RowBox[{
               RowBox[{"Mean", "[", "dd21", "]"}], ",", 
               RowBox[{"Mean", "[", "dd22", "]"}]}], "]"}], "+", 
             RowBox[{"2", 
              RowBox[{"Max", "[", 
               RowBox[{
                RowBox[{"StandardDeviation", "[", "dd21", "]"}], ",", 
                RowBox[{"StandardDeviation", "[", "dd22", "]"}]}], 
               "]"}]}]}]}], "}"}], ",", 
          RowBox[{"PlotRange", "->", "All"}], ",", " ", 
          RowBox[{"ImageSize", "->", "550"}], ",", 
          RowBox[{"Exclusions", "\[Rule]", "None"}], ",", 
          RowBox[{"AxesLabel", "->", 
           RowBox[{"{", 
            RowBox[{"\"\<\>\"", ",", "\"\<P(disease)\>\""}], "}"}]}], ",", 
          "\[IndentingNewLine]", 
          RowBox[{"PlotLegends", "->", 
           RowBox[{"Placed", "[", 
            RowBox[{
             RowBox[{"{", 
              RowBox[{
              "\"\<P(disease) of 1st kernel\>\"", ",", 
               "\"\<P(disease) of 2nd kernel\>\""}], "}"}], ",", "Below"}], 
            "]"}]}], ",", 
          RowBox[{
          "PlotLabel", "->", 
           "\"\<posterior probability for disease vs 2nd measurand\>\""}], 
          ",", 
          RowBox[{"PlotTheme", "->", "\"\<Scientific\>\""}], ",", 
          RowBox[{"Filling", "->", "Bottom"}]}], "]"}], ",", "3", ",", 
        "\[IndentingNewLine]", 
        RowBox[{"Plot3D", "[", 
         RowBox[{
          RowBox[{"{", 
           RowBox[{
            RowBox[{"pp", "[", 
             RowBox[{"x", ",", "y", ",", "vd", ",", "dd121", ",", "dnd121"}], 
             "]"}], ",", 
            RowBox[{"pp", "[", 
             RowBox[{"x", ",", "y", ",", "vd", ",", "dd122", ",", "dnd122"}], 
             "]"}]}], "}"}], ",", 
          RowBox[{"{", 
           RowBox[{"x", ",", 
            RowBox[{"Max", "[", 
             RowBox[{
              RowBox[{
               RowBox[{"Min", "[", 
                RowBox[{
                 RowBox[{"Mean", "[", "dd11", "]"}], ",", 
                 RowBox[{"Mean", "[", "dd12", "]"}]}], "]"}], "-", 
               RowBox[{"2", 
                RowBox[{"Max", "[", 
                 RowBox[{
                  RowBox[{"StandardDeviation", "[", "dd11", "]"}], ",", 
                  RowBox[{"StandardDeviation", "[", "dd12", "]"}]}], 
                 "]"}]}]}], ",", "0"}], "]"}], ",", 
            RowBox[{
             RowBox[{"Max", "[", 
              RowBox[{
               RowBox[{"Mean", "[", "dd11", "]"}], ",", 
               RowBox[{"Mean", "[", "dd12", "]"}]}], "]"}], "+", 
             RowBox[{"2", 
              RowBox[{"Max", "[", 
               RowBox[{
                RowBox[{"StandardDeviation", "[", "dd11", "]"}], ",", 
                RowBox[{"StandardDeviation", "[", "dd12", "]"}]}], 
               "]"}]}]}]}], "}"}], ",", 
          RowBox[{"{", 
           RowBox[{"y", ",", 
            RowBox[{"Max", "[", 
             RowBox[{
              RowBox[{
               RowBox[{"Min", "[", 
                RowBox[{
                 RowBox[{"Mean", "[", "dd21", "]"}], ",", 
                 RowBox[{"Mean", "[", "dd22", "]"}]}], "]"}], "-", 
               RowBox[{"2", 
                RowBox[{"Max", "[", 
                 RowBox[{
                  RowBox[{"StandardDeviation", "[", "dd21", "]"}], ",", 
                  RowBox[{"StandardDeviation", "[", "dd22", "]"}]}], 
                 "]"}]}]}], ",", "0"}], "]"}], ",", 
            RowBox[{
             RowBox[{"Max", "[", 
              RowBox[{
               RowBox[{"Mean", "[", "dd21", "]"}], ",", 
               RowBox[{"Mean", "[", "dd22", "]"}]}], "]"}], "+", 
             RowBox[{"2", 
              RowBox[{"Max", "[", 
               RowBox[{
                RowBox[{"StandardDeviation", "[", "dd21", "]"}], ",", 
                RowBox[{"StandardDeviation", "[", "dd22", "]"}]}], 
               "]"}]}]}]}], "}"}], ",", 
          RowBox[{"PlotRange", "->", "All"}], ",", " ", 
          RowBox[{"PlotPoints", "->", "100"}], ",", " ", 
          RowBox[{"ImageSize", "->", "550"}], ",", 
          RowBox[{"Exclusions", "\[Rule]", "None"}], ",", 
          RowBox[{"AxesLabel", "->", 
           RowBox[{"{", 
            RowBox[{
            "\"\<1st measurand\>\"", ",", "\"\<2nd measurand\>\"", ",", 
             "\"\<P(disease)\>\""}], "}"}]}], ",", "\[IndentingNewLine]", 
          RowBox[{"PlotLegends", "->", 
           RowBox[{"Placed", "[", 
            RowBox[{
             RowBox[{"{", 
              RowBox[{
              "\"\<P(disease) of 1st kernel\>\"", ",", 
               "\"\<P(disease) of 2nd kernel\>\""}], "}"}], ",", "Below"}], 
            "]"}]}], ",", 
          RowBox[{
          "PlotLabel", "->", 
           "\"\<posterior probability for disease vs 1st & 2nd \
measurands\>\""}], ",", 
          RowBox[{"PlotPoints", "->", "100"}], ",", 
          RowBox[{"PlotTheme", "->", "\"\<Scientific\>\""}], ",", 
          RowBox[{"Exclusions", "->", "None"}]}], "]"}]}], "]"}], ",", 
      "\[IndentingNewLine]", "2", ",", 
      RowBox[{"Switch", "[", 
       RowBox[{"msr", ",", "1", ",", "\[IndentingNewLine]", 
        RowBox[{"Plot", "[", 
         RowBox[{
          RowBox[{"{", 
           RowBox[{
            RowBox[{"-", 
             RowBox[{"pp", "[", 
              RowBox[{"x", ",", "vd", ",", "dd11", ",", "dnd11"}], "]"}]}], 
            "+", 
            RowBox[{"pp", "[", 
             RowBox[{"x", ",", "vd", ",", "dd12", ",", "dnd12"}], "]"}]}], 
           "}"}], ",", 
          RowBox[{"{", 
           RowBox[{"x", ",", 
            RowBox[{"Max", "[", 
             RowBox[{
              RowBox[{
               RowBox[{"Min", "[", 
                RowBox[{
                 RowBox[{"Mean", "[", "dd11", "]"}], ",", 
                 RowBox[{"Mean", "[", "dd12", "]"}]}], "]"}], "-", 
               RowBox[{"2", 
                RowBox[{"Max", "[", 
                 RowBox[{
                  RowBox[{"StandardDeviation", "[", "dd11", "]"}], ",", 
                  RowBox[{"StandardDeviation", "[", "dd12", "]"}]}], 
                 "]"}]}]}], ",", "0"}], "]"}], ",", 
            RowBox[{
             RowBox[{"Max", "[", 
              RowBox[{
               RowBox[{"Mean", "[", "dd11", "]"}], ",", 
               RowBox[{"Mean", "[", "dd12", "]"}]}], "]"}], "+", 
             RowBox[{"2", 
              RowBox[{"Max", "[", 
               RowBox[{
                RowBox[{"StandardDeviation", "[", "dd11", "]"}], ",", 
                RowBox[{"StandardDeviation", "[", "dd12", "]"}]}], 
               "]"}]}]}]}], "}"}], ",", 
          RowBox[{"PlotRange", "->", "All"}], ",", 
          RowBox[{"ImageSize", "->", "550"}], ",", 
          RowBox[{"Exclusions", "\[Rule]", "None"}], ",", 
          RowBox[{"AxesLabel", "->", 
           RowBox[{"{", 
            RowBox[{"\"\<\>\"", ",", "\"\<\[CapitalDelta]P(disease)\>\""}], 
            "}"}]}], ",", 
          RowBox[{"PlotLegends", "->", 
           RowBox[{"Placed", "[", 
            RowBox[{
             RowBox[{
             "{", "\"\<P(disease)of 2nd kernel-P(disease) of 1st kernel\>\"", 
              "}"}], ",", "Bottom"}], "]"}]}], ",", 
          RowBox[{
          "PlotLabel", "->", 
           "\"\<difference of posterior probabilities for disease vs 1st \
measurand\>\""}], ",", 
          RowBox[{"PlotTheme", "->", "\"\<Scientific\>\""}], ",", 
          RowBox[{"Filling", "->", "Bottom"}]}], "]"}], ",", "2", ",", 
        "\[IndentingNewLine]", 
        RowBox[{"Plot", "[", 
         RowBox[{
          RowBox[{"{", 
           RowBox[{
            RowBox[{"-", 
             RowBox[{"pp", "[", 
              RowBox[{"x", ",", "vd", ",", "dd21", ",", "dnd21"}], "]"}]}], 
            "+", 
            RowBox[{"pp", "[", 
             RowBox[{"x", ",", "vd", ",", "dd22", ",", "dnd22"}], "]"}]}], 
           "}"}], ",", 
          RowBox[{"{", 
           RowBox[{"x", ",", 
            RowBox[{"Max", "[", 
             RowBox[{
              RowBox[{
               RowBox[{"Min", "[", 
                RowBox[{
                 RowBox[{"Mean", "[", "dd21", "]"}], ",", 
                 RowBox[{"Mean", "[", "dd22", "]"}]}], "]"}], "-", 
               RowBox[{"2", 
                RowBox[{"Max", "[", 
                 RowBox[{
                  RowBox[{"StandardDeviation", "[", "dd21", "]"}], ",", 
                  RowBox[{"StandardDeviation", "[", "dd22", "]"}]}], 
                 "]"}]}]}], ",", "0"}], "]"}], ",", 
            RowBox[{
             RowBox[{"Max", "[", 
              RowBox[{
               RowBox[{"Mean", "[", "dd21", "]"}], ",", 
               RowBox[{"Mean", "[", "dd22", "]"}]}], "]"}], "+", 
             RowBox[{"2", 
              RowBox[{"Max", "[", 
               RowBox[{
                RowBox[{"StandardDeviation", "[", "dd21", "]"}], ",", 
                RowBox[{"StandardDeviation", "[", "dd22", "]"}]}], 
               "]"}]}]}]}], "}"}], ",", 
          RowBox[{"PlotRange", "->", "All"}], ",", " ", 
          RowBox[{"ImageSize", "->", "550"}], ",", 
          RowBox[{"Exclusions", "\[Rule]", "None"}], ",", 
          RowBox[{"AxesLabel", "->", 
           RowBox[{"{", 
            RowBox[{"\"\<\>\"", ",", "\"\<\[CapitalDelta]P(disease)\>\""}], 
            "}"}]}], ",", "\[IndentingNewLine]", 
          RowBox[{"PlotLegends", "->", 
           RowBox[{"Placed", "[", 
            RowBox[{
             RowBox[{
             "{", "\"\<P(disease) of 2nd kernel-P(disease) of 1st kernel\>\"",
               "}"}], ",", "Bottom"}], "]"}]}], ",", 
          RowBox[{
          "PlotLabel", "->", 
           "\"\<difference of posterior probabilities for disease vs 2nd \
measurand\>\""}], ",", 
          RowBox[{"PlotTheme", "->", "\"\<Scientific\>\""}], ",", 
          RowBox[{"Filling", "->", "Bottom"}]}], "]"}], ",", "3", ",", 
        "\[IndentingNewLine]", 
        RowBox[{"Plot3D", "[", 
         RowBox[{
          RowBox[{"{", 
           RowBox[{
            RowBox[{"-", 
             RowBox[{"pp", "[", 
              RowBox[{"x", ",", "y", ",", "vd", ",", "dd121", ",", "dnd121"}],
               "]"}]}], "+", 
            RowBox[{"pp", "[", 
             RowBox[{"x", ",", "y", ",", "vd", ",", "dd122", ",", "dnd122"}], 
             "]"}]}], "}"}], ",", 
          RowBox[{"{", 
           RowBox[{"x", ",", 
            RowBox[{"Max", "[", 
             RowBox[{
              RowBox[{
               RowBox[{"Min", "[", 
                RowBox[{
                 RowBox[{"Mean", "[", "dd11", "]"}], ",", 
                 RowBox[{"Mean", "[", "dd12", "]"}]}], "]"}], "-", 
               RowBox[{"2", 
                RowBox[{"Max", "[", 
                 RowBox[{
                  RowBox[{"StandardDeviation", "[", "dd11", "]"}], ",", 
                  RowBox[{"StandardDeviation", "[", "dd12", "]"}]}], 
                 "]"}]}]}], ",", "0"}], "]"}], ",", 
            RowBox[{
             RowBox[{"Max", "[", 
              RowBox[{
               RowBox[{"Mean", "[", "dd11", "]"}], ",", 
               RowBox[{"Mean", "[", "dd12", "]"}]}], "]"}], "+", 
             RowBox[{"2", 
              RowBox[{"Max", "[", 
               RowBox[{
                RowBox[{"StandardDeviation", "[", "dd11", "]"}], ",", 
                RowBox[{"StandardDeviation", "[", "dd12", "]"}]}], 
               "]"}]}]}]}], "}"}], ",", 
          RowBox[{"{", 
           RowBox[{"y", ",", 
            RowBox[{"Max", "[", 
             RowBox[{
              RowBox[{
               RowBox[{"Min", "[", 
                RowBox[{
                 RowBox[{"Mean", "[", "dd21", "]"}], ",", 
                 RowBox[{"Mean", "[", "dd22", "]"}]}], "]"}], "-", 
               RowBox[{"2", 
                RowBox[{"Max", "[", 
                 RowBox[{
                  RowBox[{"StandardDeviation", "[", "dd21", "]"}], ",", 
                  RowBox[{"StandardDeviation", "[", "dd22", "]"}]}], 
                 "]"}]}]}], ",", "0"}], "]"}], ",", 
            RowBox[{
             RowBox[{"Max", "[", 
              RowBox[{
               RowBox[{"Mean", "[", "dd21", "]"}], ",", 
               RowBox[{"Mean", "[", "dd22", "]"}]}], "]"}], "+", 
             RowBox[{"2", 
              RowBox[{"Max", "[", 
               RowBox[{
                RowBox[{"StandardDeviation", "[", "dd21", "]"}], ",", 
                RowBox[{"StandardDeviation", "[", "dd22", "]"}]}], 
               "]"}]}]}]}], "}"}], ",", 
          RowBox[{"PlotRange", "->", "All"}], ",", " ", 
          RowBox[{"PlotPoints", "->", "100"}], ",", " ", 
          RowBox[{"ImageSize", "->", "550"}], ",", 
          RowBox[{"Exclusions", "\[Rule]", "None"}], ",", 
          RowBox[{"AxesLabel", "->", 
           RowBox[{"{", 
            RowBox[{
            "\"\<1st measurand\>\"", ",", "\"\<2nd measurand\>\"", ",", 
             "\"\<\[CapitalDelta]P(disease)\>\""}], "}"}]}], ",", 
          "\[IndentingNewLine]", 
          RowBox[{"PlotLegends", "->", 
           RowBox[{"Placed", "[", 
            RowBox[{
             RowBox[{
             "{", "\"\<P(disease) of 2nd kernel-P(disease) of 1st kernel\>\"",
               "}"}], ",", "Bottom"}], "]"}]}], ",", 
          RowBox[{
          "PlotLabel", "->", 
           "\"\<difference of posterior probabilities for disease vs 1st & \
2nd measurands\>\""}], ",", 
          RowBox[{"PlotPoints", "->", "100"}], ",", 
          RowBox[{"PlotTheme", "->", "\"\<Scientific\>\""}], ",", 
          RowBox[{"Exclusions", "->", "None"}]}], "]"}]}], "]"}]}], "]"}], 
    "]"}]}], ";"}], "\n", 
 RowBox[{
  RowBox[{
   RowBox[{"cpp3", "[", 
    RowBox[{
    "vd_", ",", "m11_", ",", "s11_", ",", "m12_", ",", "s12_", ",", "m21_", 
     ",", "s21_", ",", "m22_", ",", "s22_", ",", "cc1_", ",", "cc2_", ",", 
     "dist11_", ",", "dist12_", ",", "dist21_", ",", "dist22_", ",", "dd1_", 
     ",", "dd2_", ",", "dd12_", ",", "dnd1_", ",", "dnd2_", ",", "dnd12_", 
     ",", "msr_", ",", "val_"}], "]"}], ":=", "\[IndentingNewLine]", 
   RowBox[{"Quiet", "[", "\[IndentingNewLine]", 
    RowBox[{"Switch", "[", 
     RowBox[{"val", ",", "1", ",", "\[IndentingNewLine]", 
      RowBox[{"Switch", "[", 
       RowBox[{"msr", ",", "1", ",", "\[IndentingNewLine]", 
        RowBox[{"Plot", "[", 
         RowBox[{
          RowBox[{"{", 
           RowBox[{
            RowBox[{"pp", "[", 
             RowBox[{
             "x", ",", "vd", ",", "m11", ",", "s11", ",", "m12", ",", "s12", 
              ",", "dist11", ",", "dist12"}], "]"}], ",", 
            RowBox[{"pp", "[", 
             RowBox[{"x", ",", "vd", ",", "dd1", ",", "dnd1"}], "]"}]}], 
           "}"}], ",", 
          RowBox[{"{", 
           RowBox[{"x", ",", " ", 
            RowBox[{"Max", "[", 
             RowBox[{
              RowBox[{
               RowBox[{"Min", "[", 
                RowBox[{"m11", ",", 
                 RowBox[{"Mean", "[", "dd1", "]"}]}], "]"}], "-", 
               RowBox[{"2", 
                RowBox[{"Max", "[", 
                 RowBox[{"s11", ",", 
                  RowBox[{"StandardDeviation", "[", "dd1", "]"}]}], "]"}]}]}],
               ",", "0"}], "]"}], ",", " ", 
            RowBox[{
             RowBox[{"Max", "[", 
              RowBox[{"m11", ",", 
               RowBox[{"Mean", "[", "dd1", "]"}]}], "]"}], "+", 
             RowBox[{"2", 
              RowBox[{"Max", "[", 
               RowBox[{"s11", ",", 
                RowBox[{"StandardDeviation", "[", "dd1", "]"}]}], "]"}]}]}]}],
            "}"}], ",", 
          RowBox[{"PlotRange", "->", "All"}], ",", 
          RowBox[{"Exclusions", "\[Rule]", "None"}], ",", 
          RowBox[{"AxesLabel", "->", 
           RowBox[{"{", 
            RowBox[{"\"\<1st measurand\>\"", ",", "\"\<P(disease)\>\""}], 
            "}"}]}], ",", 
          RowBox[{"PlotLegends", "->", 
           RowBox[{"Placed", "[", 
            RowBox[{
             RowBox[{"{", 
              RowBox[{
              "\"\<parametric P(disease)\>\"", ",", 
               "\"\<KDE P(disease)\>\""}], "}"}], ",", "Bottom"}], "]"}]}], 
          ",", 
          RowBox[{
          "PlotLabel", "->", 
           "\"\<posterior probability for disease vs 1st measurand\>\""}], 
          ",", 
          RowBox[{"ImageSize", "->", "550"}], ",", 
          RowBox[{"PlotTheme", "->", "\"\<Scientific\>\""}], ",", 
          RowBox[{"Filling", "->", "Bottom"}]}], "]"}], ",", "2", ",", 
        "\[IndentingNewLine]", 
        RowBox[{"Plot", "[", 
         RowBox[{
          RowBox[{"{", 
           RowBox[{
            RowBox[{"pp", "[", 
             RowBox[{
             "x", ",", "vd", ",", "m21", ",", "s21", ",", "m22", ",", "s22", 
              ",", "dist21", ",", "dist22"}], "]"}], ",", 
            RowBox[{"pp", "[", 
             RowBox[{"x", ",", "vd", ",", "dd2", ",", "dnd2"}], "]"}]}], 
           "}"}], ",", 
          RowBox[{"{", 
           RowBox[{"x", ",", " ", 
            RowBox[{"Max", "[", 
             RowBox[{
              RowBox[{
               RowBox[{"Min", "[", 
                RowBox[{"m21", ",", 
                 RowBox[{"Mean", "[", "dd2", "]"}]}], "]"}], "-", 
               RowBox[{"2", 
                RowBox[{"Max", "[", 
                 RowBox[{"s21", ",", 
                  RowBox[{"StandardDeviation", "[", "dd2", "]"}]}], "]"}]}]}],
               ",", "0"}], "]"}], ",", " ", 
            RowBox[{
             RowBox[{"Max", "[", 
              RowBox[{"m21", ",", 
               RowBox[{"Mean", "[", "dd2", "]"}]}], "]"}], "+", 
             RowBox[{"2", 
              RowBox[{"Max", "[", 
               RowBox[{"s21", ",", 
                RowBox[{"StandardDeviation", "[", "dd2", "]"}]}], "]"}]}]}]}],
            "}"}], ",", 
          RowBox[{"PlotRange", "->", "All"}], ",", 
          RowBox[{"Exclusions", "\[Rule]", "None"}], ",", 
          RowBox[{"AxesLabel", "->", 
           RowBox[{"{", 
            RowBox[{"\"\<2nd measurand\>\"", ",", "\"\<P(disease)\>\""}], 
            "}"}]}], ",", 
          RowBox[{"PlotLegends", "->", 
           RowBox[{"Placed", "[", 
            RowBox[{
             RowBox[{"{", 
              RowBox[{
              "\"\<parametric P(disease)\>\"", ",", 
               "\"\<KDE P(disease)\>\""}], "}"}], ",", "Bottom"}], "]"}]}], 
          ",", 
          RowBox[{
          "PlotLabel", "->", 
           "\"\<posterior probability for disease vs 2nd measurand\>\""}], 
          ",", 
          RowBox[{"ImageSize", "->", "550"}], ",", 
          RowBox[{"PlotTheme", "->", "\"\<Scientific\>\""}], ",", 
          RowBox[{"Filling", "->", "Bottom"}]}], "]"}], ",", "3", ",", 
        "\[IndentingNewLine]", 
        RowBox[{"Plot3D", "[", 
         RowBox[{
          RowBox[{"{", 
           RowBox[{
            RowBox[{"pp", "[", 
             RowBox[{
             "x", ",", "y", ",", "vd", ",", "m11", ",", "s11", ",", "m12", 
              ",", "s12", ",", "m21", ",", "s21", ",", "m22", ",", "s22", ",",
               "cc1", ",", "cc2", ",", "dist11", ",", "dist12", ",", "dist21",
               ",", "dist22"}], "]"}], ",", 
            RowBox[{"pp", "[", 
             RowBox[{"x", ",", "y", ",", "vd", ",", "dd12", ",", "dnd12"}], 
             "]"}]}], "}"}], ",", 
          RowBox[{"{", 
           RowBox[{"x", ",", " ", 
            RowBox[{"Max", "[", 
             RowBox[{
              RowBox[{
               RowBox[{"Min", "[", 
                RowBox[{"m11", ",", 
                 RowBox[{"Mean", "[", "dd1", "]"}]}], "]"}], "-", 
               RowBox[{"2", 
                RowBox[{"Max", "[", 
                 RowBox[{"s11", ",", 
                  RowBox[{"StandardDeviation", "[", "dd1", "]"}]}], "]"}]}]}],
               ",", "0"}], "]"}], ",", " ", 
            RowBox[{
             RowBox[{"Max", "[", 
              RowBox[{"m11", ",", 
               RowBox[{"Mean", "[", "dd1", "]"}]}], "]"}], "+", 
             RowBox[{"2", 
              RowBox[{"Max", "[", 
               RowBox[{"s11", ",", 
                RowBox[{"StandardDeviation", "[", "dd1", "]"}]}], "]"}]}]}]}],
            "}"}], ",", 
          RowBox[{"{", 
           RowBox[{"y", ",", " ", 
            RowBox[{"Max", "[", 
             RowBox[{
              RowBox[{
               RowBox[{"Min", "[", 
                RowBox[{"m21", ",", 
                 RowBox[{"Mean", "[", "dd2", "]"}]}], "]"}], "-", 
               RowBox[{"2", 
                RowBox[{"Max", "[", 
                 RowBox[{"s21", ",", 
                  RowBox[{"StandardDeviation", "[", "dd2", "]"}]}], "]"}]}]}],
               ",", "0"}], "]"}], ",", " ", 
            RowBox[{
             RowBox[{"Max", "[", 
              RowBox[{"m21", ",", 
               RowBox[{"Mean", "[", "dd2", "]"}]}], "]"}], "+", 
             RowBox[{"2", 
              RowBox[{"Max", "[", 
               RowBox[{"s21", ",", 
                RowBox[{"StandardDeviation", "[", "dd2", "]"}]}], "]"}]}]}]}],
            "}"}], ",", 
          RowBox[{"PlotRange", "->", "All"}], ",", 
          RowBox[{"Exclusions", "\[Rule]", "None"}], ",", 
          RowBox[{"AxesLabel", "->", 
           RowBox[{"{", 
            RowBox[{
            "\"\<1st measurand\>\"", ",", "\"\< 2nd measurand\>\"", ",", 
             "\"\<P(disease)\>\""}], "}"}]}], ",", 
          RowBox[{"PlotLegends", "->", 
           RowBox[{"Placed", "[", 
            RowBox[{
             RowBox[{"{", 
              RowBox[{
              "\"\<parametric P(disease)\>\"", ",", 
               "\"\<KDE P(disease)\>\""}], "}"}], ",", "Bottom"}], "]"}]}], 
          ",", 
          RowBox[{
          "PlotLabel", "->", 
           "\"\<posterior probability for disease vs 1st and 2nd measurands\>\
\""}], ",", 
          RowBox[{"ImageSize", "->", "550"}], ",", 
          RowBox[{"PlotTheme", "->", "\"\<Scientific\>\""}]}], "]"}]}], "]"}],
       ",", "\[IndentingNewLine]", "2", ",", "\[IndentingNewLine]", 
      RowBox[{"Switch", "[", 
       RowBox[{"msr", ",", "1", ",", "\[IndentingNewLine]", 
        RowBox[{"Plot", "[", 
         RowBox[{
          RowBox[{"{", 
           RowBox[{
            RowBox[{"-", 
             RowBox[{"pp", "[", 
              RowBox[{
              "x", ",", "vd", ",", "m11", ",", "s11", ",", "m12", ",", "s12", 
               ",", "dist11", ",", "dist12"}], "]"}]}], "+", 
            RowBox[{"pp", "[", 
             RowBox[{"x", ",", "vd", ",", "dd1", ",", "dnd1"}], "]"}]}], 
           "}"}], ",", 
          RowBox[{"{", 
           RowBox[{"x", ",", " ", 
            RowBox[{"Max", "[", 
             RowBox[{
              RowBox[{
               RowBox[{"Min", "[", 
                RowBox[{"m11", ",", 
                 RowBox[{"Mean", "[", "dd1", "]"}]}], "]"}], "-", 
               RowBox[{"2", 
                RowBox[{"Max", "[", 
                 RowBox[{"s11", ",", 
                  RowBox[{"StandardDeviation", "[", "dd1", "]"}]}], "]"}]}]}],
               ",", "0"}], "]"}], ",", " ", 
            RowBox[{
             RowBox[{"Max", "[", 
              RowBox[{"m11", ",", 
               RowBox[{"Mean", "[", "dd1", "]"}]}], "]"}], "+", 
             RowBox[{"2", 
              RowBox[{"Max", "[", 
               RowBox[{"s11", ",", 
                RowBox[{"StandardDeviation", "[", "dd1", "]"}]}], "]"}]}]}]}],
            "}"}], ",", 
          RowBox[{"PlotRange", "->", "All"}], ",", 
          RowBox[{"Exclusions", "\[Rule]", "None"}], ",", 
          RowBox[{"AxesLabel", "->", 
           RowBox[{"{", 
            RowBox[{
            "\"\<1st measurand\>\"", ",", 
             "\"\<\[CapitalDelta]P(disease)\>\""}], "}"}]}], ",", 
          RowBox[{"PlotLegends", "->", 
           RowBox[{"Placed", "[", 
            RowBox[{
             RowBox[{"{", 
              RowBox[{
              "\"\<KDE P(disease)\>\"", "-", 
               "\"\<parametric P(disease)\>\""}], "}"}], ",", "Bottom"}], 
            "]"}]}], ",", 
          RowBox[{
          "PlotLabel", "->", 
           "\"\<difference of posterior probabilities for disease vs 1st \
measurand\>\""}], ",", 
          RowBox[{"ImageSize", "->", "550"}], ",", 
          RowBox[{"PlotTheme", "->", "\"\<Scientific\>\""}], ",", 
          RowBox[{"Filling", "->", "Bottom"}]}], "]"}], ",", "2", ",", 
        "\[IndentingNewLine]", 
        RowBox[{"Plot", "[", 
         RowBox[{
          RowBox[{"{", 
           RowBox[{
            RowBox[{"-", 
             RowBox[{"pp", "[", 
              RowBox[{
              "x", ",", "vd", ",", "m21", ",", "s21", ",", "m22", ",", "s22", 
               ",", "dist21", ",", "dist22"}], "]"}]}], "+", 
            RowBox[{"pp", "[", 
             RowBox[{"x", ",", "vd", ",", "dd2", ",", "dnd2"}], "]"}]}], 
           "}"}], ",", 
          RowBox[{"{", 
           RowBox[{"x", ",", " ", 
            RowBox[{"Max", "[", 
             RowBox[{
              RowBox[{
               RowBox[{"Min", "[", 
                RowBox[{"m21", ",", 
                 RowBox[{"Mean", "[", "dd2", "]"}]}], "]"}], "-", 
               RowBox[{"2", 
                RowBox[{"Max", "[", 
                 RowBox[{"s21", ",", 
                  RowBox[{"StandardDeviation", "[", "dd2", "]"}]}], "]"}]}]}],
               ",", "0"}], "]"}], ",", " ", 
            RowBox[{
             RowBox[{"Max", "[", 
              RowBox[{"m21", ",", 
               RowBox[{"Mean", "[", "dd2", "]"}]}], "]"}], "+", 
             RowBox[{"2", 
              RowBox[{"Max", "[", 
               RowBox[{"s21", ",", 
                RowBox[{"StandardDeviation", "[", "dd2", "]"}]}], "]"}]}]}]}],
            "}"}], ",", 
          RowBox[{"PlotRange", "->", "All"}], ",", 
          RowBox[{"Exclusions", "\[Rule]", "None"}], ",", 
          RowBox[{"AxesLabel", "->", 
           RowBox[{"{", 
            RowBox[{
            "\"\<2nd measurand\>\"", ",", 
             "\"\<\[CapitalDelta]P(disease)\>\""}], "}"}]}], ",", 
          RowBox[{"PlotLegends", "->", 
           RowBox[{"Placed", "[", 
            RowBox[{
             RowBox[{"{", 
              RowBox[{
              "\"\<KDE P(disease)\>\"", "-", 
               "\"\<parametric P(disease)\>\""}], "}"}], ",", "Bottom"}], 
            "]"}]}], ",", 
          RowBox[{
          "PlotLabel", "->", 
           "\"\<difference of posterior probabilities for disease vs 2nd \
measurand\>\""}], ",", 
          RowBox[{"ImageSize", "->", "550"}], ",", 
          RowBox[{"PlotTheme", "->", "\"\<Scientific\>\""}], ",", 
          RowBox[{"Filling", "->", "Bottom"}]}], "]"}], ",", "3", ",", 
        "\[IndentingNewLine]", 
        RowBox[{"Plot3D", "[", 
         RowBox[{
          RowBox[{"{", 
           RowBox[{
            RowBox[{"-", 
             RowBox[{"pp", "[", 
              RowBox[{
              "x", ",", "y", ",", "vd", ",", "m11", ",", "s11", ",", "m12", 
               ",", "s12", ",", "m21", ",", "s21", ",", "m22", ",", "s22", 
               ",", "cc1", ",", "cc2", ",", "dist11", ",", "dist12", ",", 
               "dist21", ",", "dist22"}], "]"}]}], "+", 
            RowBox[{"pp", "[", 
             RowBox[{"x", ",", "y", ",", "vd", ",", "dd12", ",", "dnd12"}], 
             "]"}]}], "}"}], ",", 
          RowBox[{"{", 
           RowBox[{"x", ",", " ", 
            RowBox[{"Max", "[", 
             RowBox[{
              RowBox[{
               RowBox[{"Min", "[", 
                RowBox[{"m11", ",", 
                 RowBox[{"Mean", "[", "dd1", "]"}]}], "]"}], "-", 
               RowBox[{"2", 
                RowBox[{"Max", "[", 
                 RowBox[{"s11", ",", 
                  RowBox[{"StandardDeviation", "[", "dd1", "]"}]}], "]"}]}]}],
               ",", "0"}], "]"}], ",", " ", 
            RowBox[{
             RowBox[{"Max", "[", 
              RowBox[{"m11", ",", 
               RowBox[{"Mean", "[", "dd1", "]"}]}], "]"}], "+", 
             RowBox[{"2", 
              RowBox[{"Max", "[", 
               RowBox[{"s11", ",", 
                RowBox[{"StandardDeviation", "[", "dd1", "]"}]}], "]"}]}]}]}],
            "}"}], ",", 
          RowBox[{"{", 
           RowBox[{"y", ",", " ", 
            RowBox[{"Max", "[", 
             RowBox[{
              RowBox[{
               RowBox[{"Min", "[", 
                RowBox[{"m21", ",", 
                 RowBox[{"Mean", "[", "dd2", "]"}]}], "]"}], "-", 
               RowBox[{"2", 
                RowBox[{"Max", "[", 
                 RowBox[{"s21", ",", 
                  RowBox[{"StandardDeviation", "[", "dd2", "]"}]}], "]"}]}]}],
               ",", "0"}], "]"}], ",", " ", 
            RowBox[{
             RowBox[{"Max", "[", 
              RowBox[{"m21", ",", 
               RowBox[{"Mean", "[", "dd2", "]"}]}], "]"}], "+", 
             RowBox[{"2", 
              RowBox[{"Max", "[", 
               RowBox[{"s21", ",", 
                RowBox[{"StandardDeviation", "[", "dd2", "]"}]}], "]"}]}]}]}],
            "}"}], ",", 
          RowBox[{"PlotRange", "->", "All"}], ",", 
          RowBox[{"Exclusions", "\[Rule]", "None"}], ",", 
          RowBox[{"AxesLabel", "->", 
           RowBox[{"{", 
            RowBox[{
            "\"\<1st measurand\>\"", ",", "\"\< 2nd measurand\>\"", ",", 
             "\"\<\[CapitalDelta]P(disease)\>\""}], "}"}]}], ",", 
          RowBox[{"PlotLegends", "->", 
           RowBox[{"Placed", "[", 
            RowBox[{
             RowBox[{"{", 
              RowBox[{
              "\"\<KDE P(disease)\>\"", "-", 
               "\"\<parametric P(disease)\>\""}], "}"}], ",", "Bottom"}], 
            "]"}]}], ",", 
          RowBox[{
          "PlotLabel", "->", 
           "\"\<difference of posterior probability for disease vs 1st and \
2nd measurands\>\""}], ",", 
          RowBox[{"ImageSize", "->", "550"}], ",", 
          RowBox[{"PlotTheme", "->", "\"\<Scientific\>\""}]}], "]"}]}], 
       "]"}]}], "]"}], "]"}]}], ";"}], "\[IndentingNewLine]", 
 RowBox[{
  RowBox[{
   RowBox[{"pdf", "[", 
    RowBox[{"x_", ",", "m_", ",", "s_", ",", "dist_"}], "]"}], ":=", 
   RowBox[{"Switch", "[", 
    RowBox[{"dist", ",", "\"\<normal\>\"", ",", 
     RowBox[{"N", "[", 
      RowBox[{"PDF", "[", 
       RowBox[{
        RowBox[{"NormalDistribution", "[", 
         RowBox[{"m", ",", "s"}], "]"}], ",", "x"}], "]"}], "]"}], ",", 
     "\"\<lognormal\>\"", ",", 
     RowBox[{"N", "[", 
      RowBox[{"PDF", "[", 
       RowBox[{
        RowBox[{"logNormalDistribution", "[", 
         RowBox[{"m", ",", "s"}], "]"}], ",", "x"}], "]"}], "]"}], ",", 
     "\"\<gamma\>\"", ",", 
     RowBox[{"N", "[", 
      RowBox[{"PDF", "[", 
       RowBox[{
        RowBox[{"gammaDistribution", "[", 
         RowBox[{"m", ",", "s"}], "]"}], ",", "x"}], "]"}], "]"}]}], "]"}]}], 
  ";"}], "\[IndentingNewLine]", 
 RowBox[{
  RowBox[{
   RowBox[{"pdf", "[", 
    RowBox[{
    "x1_", ",", "x2_", ",", "m1_", ",", "s1_", ",", "m2_", ",", "s2_", ",", 
     "cc_", ",", "dist1_", ",", "dist2_"}], "]"}], ":=", 
   RowBox[{"N", "[", 
    RowBox[{"PDF", "[", 
     RowBox[{
      RowBox[{"biVariateDistribution", "[", 
       RowBox[{
       "m1", ",", "s1", ",", "m2", ",", "s2", ",", "cc", ",", "dist1", ",", 
        "dist2"}], "]"}], ",", 
      RowBox[{"{", 
       RowBox[{"x1", ",", "x2"}], "}"}]}], "]"}], "]"}]}], 
  ";"}], "\[IndentingNewLine]", 
 RowBox[{
  RowBox[{
   RowBox[{"cpdf1", "[", 
    RowBox[{
    "vd_", ",", "m11_", ",", "s11_", ",", "m12_", ",", "s12_", ",", "m21_", 
     ",", "s21_", ",", "m22_", ",", "s22_", ",", "cc1_", ",", "cc2_", ",", 
     "dist111_", ",", "dist121_", ",", "dist211_", ",", "dist221_", ",", 
     "dist112_", ",", "dist122_", ",", "dist212_", ",", "dist222_", ",", 
     "msr_", ",", "pop_"}], "]"}], ":=", "\[IndentingNewLine]", 
   RowBox[{"Quiet", "[", 
    RowBox[{"Switch", "[", 
     RowBox[{
     "pop", ",", "\[IndentingNewLine]", "1", ",", "\[IndentingNewLine]", 
      RowBox[{"Switch", "[", 
       RowBox[{
       "msr", ",", "\[IndentingNewLine]", "1", ",", "\[IndentingNewLine]", 
        RowBox[{"Plot", "[", 
         RowBox[{
          RowBox[{"{", 
           RowBox[{
            RowBox[{"pdf", "[", 
             RowBox[{"x", ",", "m11", ",", "s11", ",", "dist111"}], "]"}], 
            ",", 
            RowBox[{"pdf", "[", 
             RowBox[{"x", ",", "m11", ",", "s11", ",", "dist112"}], "]"}]}], 
           "}"}], ",", 
          RowBox[{"{", 
           RowBox[{"x", ",", 
            RowBox[{"Min", "[", 
             RowBox[{
              RowBox[{"Max", "[", 
               RowBox[{
                RowBox[{"m22", "-", 
                 RowBox[{"3", "s22"}]}], ",", "0"}], "]"}], ",", "mid1"}], 
             "]"}], ",", 
            RowBox[{"Max", "[", 
             RowBox[{
              RowBox[{"m22", "+", 
               RowBox[{"3", "s22"}]}], ",", "mad1"}], "]"}]}], "}"}], ",", 
          RowBox[{"PlotRange", "->", "All"}], ",", 
          RowBox[{"AxesLabel", "->", 
           RowBox[{"{", 
            RowBox[{"\"\<1st measurand\>\"", ",", "\"\<\>\""}], "}"}]}], ",", 
          RowBox[{
          "PlotLabel", "->", "\"\<PDF of 1st measurand in diseased\>\""}], 
          ",", 
          RowBox[{"PlotLegends", "->", 
           RowBox[{"Placed", "[", 
            RowBox[{
             RowBox[{"{", 
              RowBox[{"\"\<1st set PDF\>\"", ",", "\"\<2nd set PDF\>\""}], 
              "}"}], ",", "Bottom"}], "]"}]}], ",", 
          RowBox[{"ImageSize", "->", "550"}], ",", 
          RowBox[{"PlotTheme", "->", "\"\<Scientific\>\""}], ",", 
          RowBox[{"Filling", "->", "Bottom"}]}], "]"}], ",", "2", ",", "\n", 
        "\t", 
        RowBox[{"Plot", "[", " ", 
         RowBox[{
          RowBox[{"{", 
           RowBox[{
            RowBox[{"pdf", "[", 
             RowBox[{"x", ",", "m21", ",", "s21", ",", "dist211"}], "]"}], 
            ",", 
            RowBox[{"pdf", "[", 
             RowBox[{"x", ",", "m21", ",", "s21", ",", "dist212"}], "]"}]}], 
           "}"}], ",", 
          RowBox[{"{", 
           RowBox[{"x", ",", 
            RowBox[{"Min", "[", 
             RowBox[{
              RowBox[{"Max", "[", 
               RowBox[{
                RowBox[{"m21", "-", 
                 RowBox[{"3", "s21"}]}], ",", "0"}], "]"}], ",", "mid2"}], 
             "]"}], ",", 
            RowBox[{"Max", "[", 
             RowBox[{
              RowBox[{"m21", "+", 
               RowBox[{"3", "s21"}]}], ",", "mad2"}], "]"}]}], "}"}], ",", 
          RowBox[{"PlotRange", "->", "All"}], ",", 
          RowBox[{"AxesLabel", "->", 
           RowBox[{"{", 
            RowBox[{"\"\< 2nd measurand\>\"", ",", "\"\<\>\""}], "}"}]}], ",", 
          RowBox[{
          "PlotLabel", "->", "\"\<PDF of 2nd measurand in diseased\>\""}], 
          ",", 
          RowBox[{"PlotLegends", "->", 
           RowBox[{"Placed", "[", 
            RowBox[{
             RowBox[{"{", 
              RowBox[{"\"\<1st set PDF\>\"", ",", "\"\<2nd set PDF\>\""}], 
              "}"}], ",", "Bottom"}], "]"}]}], ",", 
          RowBox[{"ImageSize", "->", "550"}], ",", 
          RowBox[{"PlotTheme", "->", "\"\<Scientific\>\""}], ",", 
          RowBox[{"Filling", "->", "Bottom"}]}], "]"}], ",", "3", ",", 
        "\[IndentingNewLine]", 
        RowBox[{"Plot3D", "[", 
         RowBox[{
          RowBox[{"{", 
           RowBox[{
            RowBox[{"pdf", "[", 
             RowBox[{
             "x", ",", "y", ",", "m11", ",", "s11", ",", "m21", ",", "s21", 
              ",", "cc1", ",", "dist111", ",", "dist211"}], "]"}], ",", 
            RowBox[{"pdf", "[", 
             RowBox[{
             "x", ",", "y", ",", "m11", ",", "s11", ",", "m21", ",", "s21", 
              ",", "cc1", ",", "dist112", ",", "dist212"}], "]"}]}], "}"}], 
          ",", 
          RowBox[{"{", 
           RowBox[{"x", ",", 
            RowBox[{"Min", "[", 
             RowBox[{
              RowBox[{"Max", "[", 
               RowBox[{
                RowBox[{"m22", "-", 
                 RowBox[{"3", "s22"}]}], ",", "0"}], "]"}], ",", "mid1"}], 
             "]"}], ",", 
            RowBox[{"Max", "[", 
             RowBox[{
              RowBox[{"m22", "+", 
               RowBox[{"3", "s22"}]}], ",", "mad1"}], "]"}]}], "}"}], ",", 
          RowBox[{"{", 
           RowBox[{"y", ",", 
            RowBox[{"Min", "[", 
             RowBox[{
              RowBox[{"Max", "[", 
               RowBox[{
                RowBox[{"m21", "-", 
                 RowBox[{"3", "s21"}]}], ",", "0"}], "]"}], ",", "mid2"}], 
             "]"}], ",", 
            RowBox[{"Max", "[", 
             RowBox[{
              RowBox[{"m21", "+", 
               RowBox[{"3", "s21"}]}], ",", "mad2"}], "]"}]}], "}"}], ",", 
          RowBox[{"PlotRange", "->", "Full"}], ",", 
          RowBox[{"AxesLabel", "->", 
           RowBox[{"{", 
            RowBox[{
            "\"\<1st measurand\>\"", ",", "\"\< 2nd measurand\>\"", ",", 
             "\"\<\>\""}], "}"}]}], ",", 
          RowBox[{
          "PlotLabel", "->", 
           "\"\<bivariate PDF of 1st and 2nd measurands in diseased\>\""}], 
          ",", 
          RowBox[{"PlotLegends", "->", 
           RowBox[{"Placed", "[", 
            RowBox[{
             RowBox[{"{", 
              RowBox[{"\"\<1st set PDF\>\"", ",", "\"\<2nd set PDF\>\""}], 
              "}"}], ",", "Bottom"}], "]"}]}], ",", 
          RowBox[{"ImageSize", "->", "550"}], ",", 
          RowBox[{"PlotTheme", "->", "\"\<Scientific\>\""}], ",", 
          RowBox[{"Filling", "->", "Bottom"}]}], "]"}]}], "]"}], ",", 
      "\[IndentingNewLine]", "2", ",", "\[IndentingNewLine]", 
      RowBox[{"Switch", "[", 
       RowBox[{
       "msr", ",", "\[IndentingNewLine]", "1", ",", "\[IndentingNewLine]", 
        RowBox[{"Plot", "[", 
         RowBox[{
          RowBox[{"{", 
           RowBox[{
            RowBox[{"pdf", "[", 
             RowBox[{"x", ",", "m12", ",", "s12", ",", "dist121"}], "]"}], 
            ",", 
            RowBox[{"pdf", "[", 
             RowBox[{"x", ",", "m12", ",", "s12", ",", "dist122"}], "]"}]}], 
           "}"}], ",", 
          RowBox[{"{", 
           RowBox[{"x", ",", 
            RowBox[{"Min", "[", 
             RowBox[{
              RowBox[{"Max", "[", 
               RowBox[{
                RowBox[{"m12", "-", 
                 RowBox[{"3", "s12"}]}], ",", "0"}], "]"}], ",", "mind1"}], 
             "]"}], ",", 
            RowBox[{"Max", "[", 
             RowBox[{
              RowBox[{"m12", "+", 
               RowBox[{"3", "s12"}]}], ",", "mand1"}], "]"}]}], "}"}], ",", 
          RowBox[{"PlotRange", "->", "All"}], ",", 
          RowBox[{"AxesLabel", "->", 
           RowBox[{"{", 
            RowBox[{"\"\<1st measurand\>\"", ",", "\"\<\>\""}], "}"}]}], ",", 
          RowBox[{
          "PlotLabel", "->", "\"\<PDF of 1st measurand in nondiseased\>\""}], 
          ",", 
          RowBox[{"PlotLegends", "->", 
           RowBox[{"Placed", "[", 
            RowBox[{
             RowBox[{"{", 
              RowBox[{"\"\<1st set PDF\>\"", ",", "\"\<2nd set PDF\>\""}], 
              "}"}], ",", "Bottom"}], "]"}]}], ",", 
          RowBox[{"ImageSize", "->", "550"}], ",", 
          RowBox[{"PlotTheme", "->", "\"\<Scientific\>\""}], ",", 
          RowBox[{"Filling", "->", "Bottom"}]}], "]"}], ",", 
        "\[IndentingNewLine]", "2", ",", "\n", "\t", 
        RowBox[{"Plot", "[", 
         RowBox[{
          RowBox[{"{", 
           RowBox[{
            RowBox[{"pdf", "[", 
             RowBox[{"x", ",", "m22", ",", "s22", ",", "dist221"}], "]"}], 
            ",", 
            RowBox[{"pdf", "[", 
             RowBox[{"x", ",", "m22", ",", "s22", ",", "dist222"}], "]"}]}], 
           "}"}], ",", 
          RowBox[{"{", 
           RowBox[{"x", ",", 
            RowBox[{"Min", "[", 
             RowBox[{
              RowBox[{"Max", "[", 
               RowBox[{
                RowBox[{"m22", "-", 
                 RowBox[{"3", "s22"}]}], ",", "0"}], "]"}], ",", "mind2"}], 
             "]"}], ",", 
            RowBox[{"Max", "[", 
             RowBox[{
              RowBox[{"m22", "+", 
               RowBox[{"3", "s22"}]}], ",", "mand2"}], "]"}]}], "}"}], ",", 
          RowBox[{"PlotRange", "->", "All"}], ",", 
          RowBox[{"AxesLabel", "->", 
           RowBox[{"{", 
            RowBox[{"\"\< 2nd measurand\>\"", ",", "\"\<\>\""}], "}"}]}], ",", 
          RowBox[{
          "PlotLabel", "->", "\"\<PDF of 2nd measurand in nondiseased\>\""}], 
          ",", 
          RowBox[{"PlotLegends", "->", 
           RowBox[{"Placed", "[", 
            RowBox[{
             RowBox[{"{", 
              RowBox[{"\"\<1st set PDF\>\"", ",", "\"\<2nd set PDF\>\""}], 
              "}"}], ",", "Bottom"}], "]"}]}], ",", 
          RowBox[{"ImageSize", "->", "550"}], ",", 
          RowBox[{"PlotTheme", "->", "\"\<Scientific\>\""}], ",", 
          RowBox[{"Filling", "->", "Bottom"}]}], "]"}], ",", 
        "\[IndentingNewLine]", "3", ",", "\[IndentingNewLine]", 
        RowBox[{"Plot3D", "[", 
         RowBox[{
          RowBox[{"{", 
           RowBox[{
            RowBox[{"pdf", "[", 
             RowBox[{
             "x", ",", "y", ",", "m12", ",", "s12", ",", "m22", ",", "s22", 
              ",", "cc2", ",", "dist121", ",", "dist221"}], "]"}], ",", 
            RowBox[{"pdf", "[", 
             RowBox[{
             "x", ",", "y", ",", "m12", ",", "s12", ",", "m22", ",", "s22", 
              ",", "cc2", ",", "dist122", ",", "dist222"}], "]"}]}], "}"}], 
          ",", 
          RowBox[{"{", 
           RowBox[{"x", ",", 
            RowBox[{"Min", "[", 
             RowBox[{
              RowBox[{"Max", "[", 
               RowBox[{
                RowBox[{"m12", "-", 
                 RowBox[{"3", "s12"}]}], ",", "0"}], "]"}], ",", "mind1"}], 
             "]"}], ",", 
            RowBox[{"Max", "[", 
             RowBox[{
              RowBox[{"m12", "+", 
               RowBox[{"3", "s12"}]}], ",", "mand1"}], "]"}]}], "}"}], ",", 
          RowBox[{"{", 
           RowBox[{"y", ",", 
            RowBox[{"Min", "[", 
             RowBox[{
              RowBox[{"Max", "[", 
               RowBox[{
                RowBox[{"m22", "-", 
                 RowBox[{"3", "s22"}]}], ",", "0"}], "]"}], ",", "mind2"}], 
             "]"}], ",", 
            RowBox[{"Max", "[", 
             RowBox[{
              RowBox[{"m22", "+", 
               RowBox[{"3", "s22"}]}], ",", "mand2"}], "]"}]}], "}"}], ",", 
          RowBox[{"PlotRange", "->", "Full"}], ",", 
          RowBox[{"AxesLabel", "->", 
           RowBox[{"{", 
            RowBox[{
            "\"\<1st measurand\>\"", ",", "\"\< 2nd measurand\>\"", ",", 
             "\"\<\>\""}], "}"}]}], ",", 
          RowBox[{
          "PlotLabel", "->", 
           "\"\<bivariate PDF of 1st and 2nd measurands in nondiseased\>\""}],
           ",", 
          RowBox[{"PlotLegends", "->", 
           RowBox[{"Placed", "[", 
            RowBox[{
             RowBox[{"{", 
              RowBox[{"\"\<1st set PDF\>\"", ",", "\"\<2nd set PDF\>\""}], 
              "}"}], ",", "Bottom"}], "]"}]}], ",", 
          RowBox[{"ImageSize", "->", "550"}], ",", 
          RowBox[{"PlotTheme", "->", "\"\<Scientific\>\""}]}], "]"}]}], "]"}],
       ",", "\[IndentingNewLine]", "3", ",", "\[IndentingNewLine]", 
      RowBox[{"Switch", "[", 
       RowBox[{
       "msr", ",", "\[IndentingNewLine]", "1", ",", "\[IndentingNewLine]", 
        RowBox[{"Plot", "[", 
         RowBox[{
          RowBox[{"{", 
           RowBox[{
            RowBox[{"vd", " ", 
             RowBox[{"pdf", "[", 
              RowBox[{"x", ",", "m11", ",", "s11", ",", "dist111"}], "]"}]}], 
            ",", 
            RowBox[{"vd", " ", 
             RowBox[{"pdf", "[", 
              RowBox[{"x", ",", "m11", ",", "s11", ",", "dist112"}], "]"}]}], 
            ",", 
            RowBox[{
             RowBox[{"(", 
              RowBox[{"1", "-", "vd"}], ")"}], 
             RowBox[{"pdf", "[", 
              RowBox[{"x", ",", "m12", ",", "s12", ",", "dist121"}], "]"}]}], 
            ",", 
            RowBox[{
             RowBox[{"(", 
              RowBox[{"1", "-", "vd"}], ")"}], 
             RowBox[{"pdf", "[", 
              RowBox[{"x", ",", "m12", ",", "s12", ",", "dist122"}], 
              "]"}]}]}], "}"}], ",", 
          RowBox[{"{", 
           RowBox[{"x", ",", 
            RowBox[{"Min", "[", 
             RowBox[{
              RowBox[{"Max", "[", 
               RowBox[{
                RowBox[{
                 RowBox[{"Min", "[", 
                  RowBox[{"m11", ",", "m12"}], "]"}], "-", 
                 RowBox[{"3", 
                  RowBox[{"Max", "[", 
                   RowBox[{"s11", ",", "s12"}], "]"}]}]}], ",", "0"}], "]"}], 
              ",", "mid1", ",", "mind1"}], "]"}], ",", 
            RowBox[{"Max", "[", 
             RowBox[{
              RowBox[{
               RowBox[{"Max", "[", 
                RowBox[{"m11", ",", "m12"}], "]"}], "+", 
               RowBox[{"3", 
                RowBox[{"Max", "[", 
                 RowBox[{"s11", ",", "s12"}], "]"}]}]}], ",", "mad1", ",", 
              "mand1"}], "]"}]}], "}"}], ",", 
          RowBox[{"PlotRange", "->", "All"}], ",", 
          RowBox[{"AxesLabel", "->", 
           RowBox[{"{", 
            RowBox[{"\"\<1st measurand\>\"", ",", "\"\<\>\""}], "}"}]}], ",", 
          RowBox[{"PlotLabel", "->", "\"\<PDF of 1st measurand\>\""}], ",", 
          RowBox[{"PlotLegends", "->", 
           RowBox[{"Placed", "[", 
            RowBox[{
             RowBox[{"{", 
              RowBox[{
              "\"\<1st set PDF, diseased\>\"", ",", 
               "\"\<2nd set PDF, diseased\>\"", ",", 
               "\"\<1st set PDF, nondiseased\>\"", ",", 
               "\"\<2nd set PDF, nondiseased\>\""}], "}"}], ",", "Bottom"}], 
            "]"}]}], ",", 
          RowBox[{"ImageSize", "->", "550"}], ",", 
          RowBox[{"PlotTheme", "->", "\"\<Scientific\>\""}], ",", 
          RowBox[{"Filling", "->", "Bottom"}]}], "]"}], ",", 
        "\[IndentingNewLine]", "2", ",", "\n", "\t", 
        RowBox[{"Plot", "[", 
         RowBox[{
          RowBox[{"{", 
           RowBox[{
            RowBox[{"vd", " ", 
             RowBox[{"pdf", "[", 
              RowBox[{"x", ",", "m21", ",", "s21", ",", "dist211"}], "]"}]}], 
            ",", 
            RowBox[{"vd", " ", 
             RowBox[{"pdf", "[", 
              RowBox[{"x", ",", "m21", ",", "s21", ",", "dist212"}], "]"}]}], 
            ",", 
            RowBox[{
             RowBox[{"(", 
              RowBox[{"1", "-", "vd"}], ")"}], 
             RowBox[{"pdf", "[", 
              RowBox[{"x", ",", "m22", ",", "s22", ",", "dist221"}], "]"}]}], 
            ",", 
            RowBox[{
             RowBox[{"(", 
              RowBox[{"1", "-", "vd"}], ")"}], 
             RowBox[{"pdf", "[", 
              RowBox[{"x", ",", "m22", ",", "s22", ",", "dist222"}], 
              "]"}]}]}], "}"}], ",", 
          RowBox[{"{", 
           RowBox[{"x", ",", 
            RowBox[{"Min", "[", 
             RowBox[{
              RowBox[{"Max", "[", 
               RowBox[{
                RowBox[{
                 RowBox[{"Min", "[", 
                  RowBox[{"m21", ",", "m22"}], "]"}], "-", 
                 RowBox[{"3", 
                  RowBox[{"Max", "[", 
                   RowBox[{"s21", ",", "s22"}], "]"}]}]}], ",", "0"}], "]"}], 
              ",", "mid2", ",", "mind2"}], "]"}], ",", 
            RowBox[{"Max", "[", 
             RowBox[{
              RowBox[{
               RowBox[{"Max", "[", 
                RowBox[{"m21", ",", "m22"}], "]"}], "+", 
               RowBox[{"3", 
                RowBox[{"Max", "[", 
                 RowBox[{"s21", ",", "s22"}], "]"}]}]}], ",", "mad2", ",", 
              "mand2"}], "]"}]}], "}"}], ",", 
          RowBox[{"PlotRange", "->", "All"}], ",", 
          RowBox[{"AxesLabel", "->", 
           RowBox[{"{", 
            RowBox[{"\"\< 2nd measurand\>\"", ",", "\"\<\>\""}], "}"}]}], ",", 
          RowBox[{"PlotLabel", "->", "\"\<PDF of 2nd measurand\>\""}], ",", 
          RowBox[{"PlotLegends", "->", 
           RowBox[{"Placed", "[", 
            RowBox[{
             RowBox[{"{", 
              RowBox[{
              "\"\<1st set PDF, diseased\>\"", ",", 
               "\"\<2nd set PDF, diseased\>\"", ",", 
               "\"\<1st set PDF, nondiseased\>\"", ",", 
               "\"\<2nd set PDF, nondiseased\>\""}], "}"}], ",", "Bottom"}], 
            "]"}]}], ",", 
          RowBox[{"ImageSize", "->", "550"}], ",", 
          RowBox[{"PlotTheme", "->", "\"\<Scientific\>\""}], ",", 
          RowBox[{"Filling", "->", "Bottom"}]}], "]"}], ",", 
        "\[IndentingNewLine]", "3", ",", "\[IndentingNewLine]", 
        RowBox[{"Plot3D", "[", 
         RowBox[{
          RowBox[{"{", 
           RowBox[{
            RowBox[{"vd", " ", 
             RowBox[{"pdf", "[", 
              RowBox[{
              "x", ",", "y", ",", "m11", ",", "s11", ",", "m21", ",", "s21", 
               ",", "cc1", ",", "dist111", ",", "dist211"}], "]"}]}], ",", 
            RowBox[{"vd", " ", 
             RowBox[{"pdf", "[", 
              RowBox[{
              "x", ",", "y", ",", "m11", ",", "s11", ",", "m21", ",", "s21", 
               ",", "cc1", ",", "dist112", ",", "dist212"}], "]"}]}], ",", 
            RowBox[{
             RowBox[{"(", 
              RowBox[{"1", "-", "vd"}], ")"}], 
             RowBox[{"pdf", "[", 
              RowBox[{
              "x", ",", "y", ",", "m12", ",", "s12", ",", "m22", ",", "s22", 
               ",", "cc2", ",", "dist122", ",", "dist222"}], "]"}]}], ",", 
            RowBox[{
             RowBox[{"(", 
              RowBox[{"1", "-", "vd"}], ")"}], 
             RowBox[{"pdf", "[", 
              RowBox[{
              "x", ",", "y", ",", "m12", ",", "s12", ",", "m22", ",", "s22", 
               ",", "cc2", ",", "dist121", ",", "dist221"}], "]"}]}]}], "}"}],
           ",", 
          RowBox[{"{", 
           RowBox[{"x", ",", 
            RowBox[{"Min", "[", 
             RowBox[{
              RowBox[{"Max", "[", 
               RowBox[{
                RowBox[{
                 RowBox[{"Min", "[", 
                  RowBox[{"m11", ",", "m12"}], "]"}], "-", 
                 RowBox[{"3", 
                  RowBox[{"Max", "[", 
                   RowBox[{"s11", ",", "s12"}], "]"}]}]}], ",", "0"}], "]"}], 
              ",", "mid1", ",", "mind1"}], "]"}], ",", 
            RowBox[{"Max", "[", 
             RowBox[{
              RowBox[{
               RowBox[{"Max", "[", 
                RowBox[{"m11", ",", "m12"}], "]"}], "+", 
               RowBox[{"3", 
                RowBox[{"Max", "[", 
                 RowBox[{"s11", ",", "s12"}], "]"}]}]}], ",", "mad1", ",", 
              "mand1"}], "]"}]}], "}"}], ",", 
          RowBox[{"{", 
           RowBox[{"y", ",", 
            RowBox[{"Min", "[", 
             RowBox[{
              RowBox[{"Max", "[", 
               RowBox[{
                RowBox[{
                 RowBox[{"Min", "[", 
                  RowBox[{"m21", ",", "m22"}], "]"}], "-", 
                 RowBox[{"3", 
                  RowBox[{"Max", "[", 
                   RowBox[{"s21", ",", "s22"}], "]"}]}]}], ",", "0"}], "]"}], 
              ",", "mid2", ",", "mind2"}], "]"}], ",", 
            RowBox[{"Max", "[", 
             RowBox[{
              RowBox[{
               RowBox[{"Max", "[", 
                RowBox[{"m21", ",", "m22"}], "]"}], "+", 
               RowBox[{"3", 
                RowBox[{"Max", "[", 
                 RowBox[{"s21", ",", "s22"}], "]"}]}]}], ",", "mad2", ",", 
              "mand2"}], "]"}]}], "}"}], ",", 
          RowBox[{"PlotRange", "->", "Full"}], ",", 
          RowBox[{"AxesLabel", "->", 
           RowBox[{"{", 
            RowBox[{
            "\"\<1st measurand\>\"", ",", "\"\< 2nd measurand\>\"", ",", 
             "\"\<\>\""}], "}"}]}], ",", 
          RowBox[{
          "PlotLabel", "->", 
           "\"\<bivariate PDF of 1st and 2nd measurands\>\""}], ",", 
          RowBox[{"PlotLegends", "->", 
           RowBox[{"Placed", "[", 
            RowBox[{
             RowBox[{"{", 
              RowBox[{
              "\"\<1st set PDF, diseased PDF\>\"", ",", 
               "\"\<2nd set PDF, diseased\>\"", ",", 
               "\"\<1st set PDF, nondiseased\>\"", ",", 
               "\"\<2nd set, nondiseased\>\""}], "}"}], ",", "Bottom"}], 
            "]"}]}], ",", 
          RowBox[{"ImageSize", "->", "550"}], ",", 
          RowBox[{"PlotTheme", "->", "\"\<Scientific\>\""}]}], "]"}]}], 
       "]"}]}], "]"}], "]"}]}], ";"}], "\[IndentingNewLine]", 
 RowBox[{
  RowBox[{
   RowBox[{"hcpdf1", "[", 
    RowBox[{
    "vd_", ",", "m11_", ",", "s11_", ",", "m12_", ",", "s12_", ",", "m21_", 
     ",", "s21_", ",", "m22_", ",", "s22_", ",", "cc1_", ",", "cc2_", ",", 
     "dist111_", ",", "dist121_", ",", "dist211_", ",", "dist221_", ",", 
     "dist112_", ",", "dist122_", ",", "dist212_", ",", "dist222_", ",", 
     "msr_", ",", "pop_"}], "]"}], ":=", "\[IndentingNewLine]", 
   RowBox[{"Quiet", "[", 
    RowBox[{"Switch", "[", 
     RowBox[{
     "pop", ",", "\[IndentingNewLine]", "1", ",", "\[IndentingNewLine]", 
      RowBox[{"Switch", "[", 
       RowBox[{
       "msr", ",", "\[IndentingNewLine]", "1", ",", "\[IndentingNewLine]", 
        RowBox[{"Show", "[", 
         RowBox[{
          RowBox[{"Histogram", "[", 
           RowBox[{"d1", ",", "\"\<Knuth\>\"", ",", "\"\<PDF\>\"", ",", 
            RowBox[{"ImageSize", "->", "550"}]}], "]"}], ",", 
          RowBox[{"Plot", "[", 
           RowBox[{
            RowBox[{"{", 
             RowBox[{
              RowBox[{"pdf", "[", 
               RowBox[{"x", ",", "m11", ",", "s11", ",", "dist111"}], "]"}], 
              ",", 
              RowBox[{"pdf", "[", 
               RowBox[{"x", ",", "m11", ",", "s11", ",", "dist112"}], "]"}]}],
              "}"}], ",", 
            RowBox[{"{", 
             RowBox[{"x", ",", 
              RowBox[{"Min", "[", 
               RowBox[{
                RowBox[{"Max", "[", 
                 RowBox[{
                  RowBox[{"m11", "-", 
                   RowBox[{"3", "s11"}]}], ",", "0"}], "]"}], ",", "mid1"}], 
               "]"}], ",", 
              RowBox[{"Max", "[", 
               RowBox[{
                RowBox[{"m11", "+", 
                 RowBox[{"3", "s11"}]}], ",", "mad1"}], "]"}]}], "}"}], ",", 
            RowBox[{"PlotRange", "->", "All"}], ",", 
            RowBox[{"AxesLabel", "->", 
             RowBox[{"{", 
              RowBox[{"\"\<1st measurand\>\"", ",", "\"\<\>\""}], "}"}]}], 
            ",", 
            RowBox[{
            "PlotLabel", "->", "\"\<PDF of 1st measurand in diseased\>\""}], 
            ",", 
            RowBox[{"PlotLegends", "->", 
             RowBox[{"Placed", "[", 
              RowBox[{
               RowBox[{"{", 
                RowBox[{"\"\<1st set PDF\>\"", ",", "\"\<2nd set PDF\>\""}], 
                "}"}], ",", "Bottom"}], "]"}]}], ",", 
            RowBox[{"ImageSize", "->", "550"}], ",", 
            RowBox[{"PlotTheme", "->", "\"\<Scientific\>\""}], ",", 
            RowBox[{"Filling", "->", "Bottom"}]}], "]"}]}], "]"}], ",", "2", 
        ",", "\n", "\t", 
        RowBox[{"Show", "[", 
         RowBox[{
          RowBox[{"Histogram", "[", 
           RowBox[{"d2", ",", "\"\<Knuth\>\"", ",", "\"\<PDF\>\"", ",", 
            RowBox[{"ImageSize", "->", "550"}]}], "]"}], ",", 
          RowBox[{"Plot", "[", " ", 
           RowBox[{
            RowBox[{"{", 
             RowBox[{
              RowBox[{"pdf", "[", 
               RowBox[{"x", ",", "m21", ",", "s21", ",", "dist211"}], "]"}], 
              ",", 
              RowBox[{"pdf", "[", 
               RowBox[{"x", ",", "m21", ",", "s21", ",", "dist212"}], "]"}]}],
              "}"}], ",", 
            RowBox[{"{", 
             RowBox[{"x", ",", 
              RowBox[{"Min", "[", 
               RowBox[{
                RowBox[{"Max", "[", 
                 RowBox[{
                  RowBox[{"m21", "-", 
                   RowBox[{"3", "s21"}]}], ",", "0"}], "]"}], ",", "mid2"}], 
               "]"}], ",", 
              RowBox[{"Max", "[", 
               RowBox[{
                RowBox[{"m21", "+", 
                 RowBox[{"3", "s21"}]}], ",", "mad2"}], "]"}]}], "}"}], ",", 
            RowBox[{"PlotRange", "->", "All"}], ",", 
            RowBox[{"AxesLabel", "->", 
             RowBox[{"{", 
              RowBox[{"\"\< 2nd measurand\>\"", ",", "\"\<\>\""}], "}"}]}], 
            ",", 
            RowBox[{
            "PlotLabel", "->", "\"\<PDF of 2nd measurand in diseased\>\""}], 
            ",", 
            RowBox[{"PlotLegends", "->", 
             RowBox[{"Placed", "[", 
              RowBox[{
               RowBox[{"{", 
                RowBox[{"\"\<1st set PDF\>\"", ",", "\"\<2nd set PDF\>\""}], 
                "}"}], ",", "Bottom"}], "]"}]}], ",", 
            RowBox[{"ImageSize", "->", "550"}], ",", 
            RowBox[{"PlotTheme", "->", "\"\<Scientific\>\""}], ",", 
            RowBox[{"Filling", "->", "Bottom"}]}], "]"}]}], "]"}], ",", "3", 
        ",", "\[IndentingNewLine]", 
        RowBox[{"Show", "[", 
         RowBox[{
          RowBox[{"Histogram3D", "[", 
           RowBox[{"d12", ",", "\"\<Knuth\>\"", ",", "\"\<PDF\>\"", ",", 
            RowBox[{"ImageSize", "->", "550"}]}], "]"}], ",", 
          RowBox[{"Plot3D", "[", 
           RowBox[{
            RowBox[{"{", 
             RowBox[{
              RowBox[{"pdf", "[", 
               RowBox[{
               "x", ",", "y", ",", "m11", ",", "s11", ",", "m21", ",", "s21", 
                ",", "cc1", ",", "dist111", ",", "dist211"}], "]"}], ",", 
              RowBox[{"pdf", "[", 
               RowBox[{
               "x", ",", "y", ",", "m11", ",", "s11", ",", "m21", ",", "s21", 
                ",", "cc1", ",", "dist112", ",", "dist212"}], "]"}]}], "}"}], 
            ",", 
            RowBox[{"{", 
             RowBox[{"x", ",", 
              RowBox[{"Min", "[", 
               RowBox[{
                RowBox[{"Max", "[", 
                 RowBox[{
                  RowBox[{"m11", "-", 
                   RowBox[{"3", "s11"}]}], ",", "0"}], "]"}], ",", "mid1"}], 
               "]"}], ",", 
              RowBox[{"Max", "[", 
               RowBox[{
                RowBox[{"m11", "+", 
                 RowBox[{"3", "s11"}]}], ",", "mad1"}], "]"}]}], "}"}], ",", 
            RowBox[{"{", 
             RowBox[{"y", ",", 
              RowBox[{"Min", "[", 
               RowBox[{
                RowBox[{"Max", "[", 
                 RowBox[{
                  RowBox[{"m21", "-", 
                   RowBox[{"3", "s21"}]}], ",", "0"}], "]"}], ",", "mid2"}], 
               "]"}], ",", 
              RowBox[{"Max", "[", 
               RowBox[{
                RowBox[{"m21", "+", 
                 RowBox[{"3", "s21"}]}], ",", "mad2"}], "]"}]}], "}"}], ",", 
            RowBox[{"PlotRange", "->", "Full"}], ",", 
            RowBox[{"AxesLabel", "->", 
             RowBox[{"{", 
              RowBox[{
              "\"\<1st measurand\>\"", ",", "\"\< 2nd measurand\>\"", ",", 
               "\"\<\>\""}], "}"}]}], ",", 
            RowBox[{
            "PlotLabel", "->", 
             "\"\<bivariate PDF of 1st and 2nd measurands in diseased\>\""}], 
            ",", 
            RowBox[{"PlotLegends", "->", 
             RowBox[{"Placed", "[", 
              RowBox[{
               RowBox[{"{", 
                RowBox[{"\"\<1st set PDF\>\"", ",", "\"\<2nd set PDF\>\""}], 
                "}"}], ",", "Bottom"}], "]"}]}], ",", 
            RowBox[{"ImageSize", "->", "550"}], ",", 
            RowBox[{"PlotTheme", "->", "\"\<Scientific\>\""}], ",", 
            RowBox[{"Filling", "->", "Bottom"}]}], "]"}]}], "]"}]}], "]"}], 
      ",", "\[IndentingNewLine]", "2", ",", "\[IndentingNewLine]", 
      RowBox[{"Switch", "[", 
       RowBox[{
       "msr", ",", "\[IndentingNewLine]", "1", ",", "\[IndentingNewLine]", 
        RowBox[{"Show", "[", 
         RowBox[{
          RowBox[{"Histogram", "[", 
           RowBox[{"nd1", ",", "\"\<Knuth\>\"", ",", "\"\<PDF\>\"", ",", 
            RowBox[{"ImageSize", "->", "550"}]}], "]"}], ",", 
          RowBox[{"Plot", "[", 
           RowBox[{
            RowBox[{"{", 
             RowBox[{
              RowBox[{"pdf", "[", 
               RowBox[{"x", ",", "m12", ",", "s12", ",", "dist121"}], "]"}], 
              ",", 
              RowBox[{"pdf", "[", 
               RowBox[{"x", ",", "m12", ",", "s12", ",", "dist122"}], "]"}]}],
              "}"}], ",", 
            RowBox[{"{", 
             RowBox[{"x", ",", 
              RowBox[{"Min", "[", 
               RowBox[{
                RowBox[{"Max", "[", 
                 RowBox[{
                  RowBox[{"m12", "-", 
                   RowBox[{"3", "s12"}]}], ",", "0"}], "]"}], ",", "mind1"}], 
               "]"}], ",", 
              RowBox[{"Max", "[", 
               RowBox[{
                RowBox[{"m12", "+", 
                 RowBox[{"3", "s12"}]}], ",", "mand1"}], "]"}]}], "}"}], ",", 
            RowBox[{"PlotRange", "->", "All"}], ",", 
            RowBox[{"AxesLabel", "->", 
             RowBox[{"{", 
              RowBox[{"\"\<1st measurand\>\"", ",", "\"\<\>\""}], "}"}]}], 
            ",", 
            RowBox[{
            "PlotLabel", "->", 
             "\"\<PDF of 1st measurand in nondiseased\>\""}], ",", 
            RowBox[{"PlotLegends", "->", 
             RowBox[{"Placed", "[", 
              RowBox[{
               RowBox[{"{", 
                RowBox[{"\"\<1st set PDF\>\"", ",", "\"\<2nd set PDF\>\""}], 
                "}"}], ",", "Bottom"}], "]"}]}], ",", 
            RowBox[{"ImageSize", "->", "550"}], ",", 
            RowBox[{"PlotTheme", "->", "\"\<Scientific\>\""}], ",", 
            RowBox[{"Filling", "->", "Bottom"}]}], "]"}]}], "]"}], ",", 
        "\[IndentingNewLine]", "2", ",", "\n", "\t", 
        RowBox[{"Show", "[", 
         RowBox[{
          RowBox[{"Histogram", "[", 
           RowBox[{"nd2", ",", "\"\<Knuth\>\"", ",", "\"\<PDF\>\"", ",", 
            RowBox[{"ImageSize", "->", "550"}]}], "]"}], ",", 
          RowBox[{"Plot", "[", 
           RowBox[{
            RowBox[{"{", 
             RowBox[{
              RowBox[{"pdf", "[", 
               RowBox[{"x", ",", "m22", ",", "s22", ",", "dist221"}], "]"}], 
              ",", 
              RowBox[{"pdf", "[", 
               RowBox[{"x", ",", "m22", ",", "s22", ",", "dist222"}], "]"}]}],
              "}"}], ",", 
            RowBox[{"{", 
             RowBox[{"x", ",", 
              RowBox[{"Min", "[", 
               RowBox[{
                RowBox[{"Max", "[", 
                 RowBox[{
                  RowBox[{"m22", "-", 
                   RowBox[{"3", "s22"}]}], ",", "0"}], "]"}], ",", "mind2"}], 
               "]"}], ",", 
              RowBox[{"Max", "[", 
               RowBox[{
                RowBox[{"m22", "+", 
                 RowBox[{"3", "s22"}]}], ",", "mand2"}], "]"}]}], "}"}], ",", 
            RowBox[{"PlotRange", "->", "All"}], ",", 
            RowBox[{"AxesLabel", "->", 
             RowBox[{"{", 
              RowBox[{"\"\< 2nd measurand\>\"", ",", "\"\<\>\""}], "}"}]}], 
            ",", 
            RowBox[{
            "PlotLabel", "->", 
             "\"\<PDF of 2nd measurand in nondiseased\>\""}], ",", 
            RowBox[{"PlotLegends", "->", 
             RowBox[{"Placed", "[", 
              RowBox[{
               RowBox[{"{", 
                RowBox[{"\"\<1st set PDF\>\"", ",", "\"\<2nd set PDF\>\""}], 
                "}"}], ",", "Bottom"}], "]"}]}], ",", 
            RowBox[{"ImageSize", "->", "550"}], ",", 
            RowBox[{"PlotTheme", "->", "\"\<Scientific\>\""}], ",", 
            RowBox[{"Filling", "->", "Bottom"}]}], "]"}]}], "]"}], ",", 
        "\[IndentingNewLine]", "3", ",", "\[IndentingNewLine]", 
        RowBox[{"Show", "[", 
         RowBox[{
          RowBox[{"Histogram3D", "[", 
           RowBox[{"nd12", ",", "\"\<Knuth\>\"", ",", "\"\<PDF\>\"", ",", 
            RowBox[{"ImageSize", "->", "550"}]}], "]"}], ",", 
          RowBox[{"Plot3D", "[", 
           RowBox[{
            RowBox[{"{", 
             RowBox[{
              RowBox[{"pdf", "[", 
               RowBox[{
               "x", ",", "y", ",", "m12", ",", "s12", ",", "m22", ",", "s22", 
                ",", "cc2", ",", "dist121", ",", "dist221"}], "]"}], ",", 
              RowBox[{"pdf", "[", 
               RowBox[{
               "x", ",", "y", ",", "m12", ",", "s12", ",", "m22", ",", "s22", 
                ",", "cc2", ",", "dist122", ",", "dist222"}], "]"}]}], "}"}], 
            ",", 
            RowBox[{"{", 
             RowBox[{"x", ",", 
              RowBox[{"Min", "[", 
               RowBox[{
                RowBox[{"Max", "[", 
                 RowBox[{
                  RowBox[{"m12", "-", 
                   RowBox[{"3", "s12"}]}], ",", "0"}], "]"}], ",", "mind1"}], 
               "]"}], ",", 
              RowBox[{"Max", "[", 
               RowBox[{
                RowBox[{"m12", "+", 
                 RowBox[{"3", "s12"}]}], ",", "mand1"}], "]"}]}], "}"}], ",", 
            RowBox[{"{", 
             RowBox[{"y", ",", 
              RowBox[{"Min", "[", 
               RowBox[{
                RowBox[{"Max", "[", 
                 RowBox[{
                  RowBox[{"m22", "-", 
                   RowBox[{"3", "s22"}]}], ",", "0"}], "]"}], ",", "mind2"}], 
               "]"}], ",", 
              RowBox[{"Max", "[", 
               RowBox[{
                RowBox[{"m22", "+", 
                 RowBox[{"3", "s22"}]}], ",", "mand2"}], "]"}]}], "}"}], ",", 
            RowBox[{"PlotRange", "->", "Full"}], ",", 
            RowBox[{"AxesLabel", "->", 
             RowBox[{"{", 
              RowBox[{
              "\"\<1st measurand\>\"", ",", "\"\< 2nd measurand\>\"", ",", 
               "\"\<\>\""}], "}"}]}], ",", 
            RowBox[{
            "PlotLabel", "->", 
             "\"\<bivariate PDF of 1st and 2nd measurands in \
nondiseased\>\""}], ",", 
            RowBox[{"PlotLegends", "->", 
             RowBox[{"Placed", "[", 
              RowBox[{
               RowBox[{"{", 
                RowBox[{"\"\<1st set PDF\>\"", ",", "\"\<2nd set PDF\>\""}], 
                "}"}], ",", "Bottom"}], "]"}]}], ",", 
            RowBox[{"ImageSize", "->", "550"}], ",", 
            RowBox[{"PlotTheme", "->", "\"\<Scientific\>\""}]}], "]"}]}], 
         "]"}]}], "]"}]}], "]"}], "]"}]}], ";"}], "\[IndentingNewLine]", 
 RowBox[{
  RowBox[{
   RowBox[{"cpdf2", "[", 
    RowBox[{
    "vd_", ",", "dd11_", ",", "dd12_", ",", "dd21_", ",", "dd22_", ",", 
     "dd121_", ",", "dd122_", ",", "dnd11_", ",", "dnd12_", ",", "dnd21_", 
     ",", "dnd22_", ",", "dnd121_", ",", "dnd122_", ",", "msr_", ",", 
     "pop_"}], "]"}], ":=", "\[IndentingNewLine]", 
   RowBox[{"Quiet", "[", 
    RowBox[{"Switch", "[", 
     RowBox[{"pop", ",", "1", ",", 
      RowBox[{"Switch", "[", 
       RowBox[{"msr", ",", "1", ",", "\[IndentingNewLine]", 
        RowBox[{"Plot", "[", 
         RowBox[{
          RowBox[{"{", 
           RowBox[{
            RowBox[{"PDF", "[", 
             RowBox[{"dd11", ",", "x"}], "]"}], ",", 
            RowBox[{"PDF", "[", 
             RowBox[{"dd12", ",", "x"}], "]"}]}], "}"}], ",", 
          RowBox[{"{", 
           RowBox[{"x", ",", 
            RowBox[{"Min", "[", 
             RowBox[{
              RowBox[{"Max", "[", 
               RowBox[{
                RowBox[{
                 RowBox[{"Min", "[", 
                  RowBox[{
                   RowBox[{"Mean", "[", "dd11", "]"}], ",", 
                   RowBox[{"Mean", "[", "dd12", "]"}]}], "]"}], "-", 
                 RowBox[{"3", 
                  RowBox[{"Max", "[", 
                   RowBox[{
                    RowBox[{"StandardDeviation", "[", "dd11", "]"}], ",", 
                    RowBox[{"StandardDeviation", "[", "dd12", "]"}]}], 
                   "]"}]}]}], ",", "0"}], "]"}], ",", "mid1"}], "]"}], ",", 
            RowBox[{
             RowBox[{"Max", "[", 
              RowBox[{
               RowBox[{"Mean", "[", "dd11", "]"}], ",", 
               RowBox[{"Mean", "[", "dd12", "]"}]}], "]"}], "+", 
             RowBox[{"3", 
              RowBox[{"Max", "[", 
               RowBox[{
                RowBox[{"StandardDeviation", "[", "dd11", "]"}], ",", 
                RowBox[{"StandardDeviation", "[", "dd12", "]"}]}], 
               "]"}]}]}]}], "}"}], ",", 
          RowBox[{"PlotRange", "->", "All"}], ",", " ", 
          RowBox[{"ImageSize", "->", "550"}], ",", 
          RowBox[{"Exclusions", "\[Rule]", "None"}], ",", 
          RowBox[{
          "PlotLabel", "->", "\"\<PDF of 1st measurand in diseased\>\""}], 
          ",", 
          RowBox[{"PlotLegends", "->", 
           RowBox[{"Placed", "[", 
            RowBox[{
             RowBox[{"{", 
              RowBox[{
              "\"\<1st kernel PDF\>\"", ",", "\"\<2nd kernel PDF\>\""}], 
              "}"}], ",", "Below"}], "]"}]}], ",", 
          RowBox[{"PlotTheme", "->", "\"\<Scientific\>\""}], ",", 
          RowBox[{"Filling", "->", "Bottom"}]}], "]"}], ",", "2", ",", "\n", 
        "\t", 
        RowBox[{"Plot", "[", 
         RowBox[{
          RowBox[{"{", 
           RowBox[{
            RowBox[{"PDF", "[", 
             RowBox[{"dd21", ",", "x"}], "]"}], ",", " ", 
            RowBox[{"PDF", "[", 
             RowBox[{"dd22", ",", "x"}], "]"}]}], "}"}], ",", 
          RowBox[{"{", 
           RowBox[{"x", ",", 
            RowBox[{"Max", "[", 
             RowBox[{
              RowBox[{
               RowBox[{"Min", "[", 
                RowBox[{
                 RowBox[{"Mean", "[", "dd21", "]"}], ",", 
                 RowBox[{"Mean", "[", "dd22", "]"}]}], "]"}], "-", 
               RowBox[{"3", 
                RowBox[{"Max", "[", 
                 RowBox[{
                  RowBox[{"StandardDeviation", "[", "dd21", "]"}], ",", 
                  RowBox[{"StandardDeviation", "[", "dd22", "]"}]}], 
                 "]"}]}]}], ",", "0"}], "]"}], ",", 
            RowBox[{
             RowBox[{"Max", "[", 
              RowBox[{
               RowBox[{"Mean", "[", "dd21", "]"}], ",", 
               RowBox[{"Mean", "[", "dd22", "]"}]}], "]"}], "+", 
             RowBox[{"3", 
              RowBox[{"Max", "[", 
               RowBox[{
                RowBox[{"StandardDeviation", "[", "dd21", "]"}], ",", 
                RowBox[{"StandardDeviation", "[", "dd22", "]"}]}], 
               "]"}]}]}]}], "}"}], ",", 
          RowBox[{"PlotRange", "->", "All"}], ",", " ", 
          RowBox[{"ImageSize", "->", "550"}], ",", 
          RowBox[{"Exclusions", "\[Rule]", "None"}], ",", 
          RowBox[{
          "PlotLabel", "->", "\"\<PDF of 2nd measurand in diseased\>\""}], 
          ",", 
          RowBox[{"PlotLegends", "->", 
           RowBox[{"Placed", "[", 
            RowBox[{
             RowBox[{"{", 
              RowBox[{
              "\"\<1st kernel PDF\>\"", ",", "\"\<2nd kernel PDF\>\""}], 
              "}"}], ",", "Below"}], "]"}]}], ",", 
          RowBox[{"PlotTheme", "->", "\"\<Scientific\>\""}], ",", 
          RowBox[{"Filling", "->", "Bottom"}]}], "]"}], ",", "3", ",", 
        "\[IndentingNewLine]", 
        RowBox[{"Plot3D", "[", 
         RowBox[{
          RowBox[{"{", 
           RowBox[{
            RowBox[{"PDF", "[", 
             RowBox[{"dd121", ",", 
              RowBox[{"{", 
               RowBox[{"x", ",", "y"}], "}"}]}], "]"}], ",", 
            RowBox[{"PDF", "[", 
             RowBox[{"dd122", ",", 
              RowBox[{"{", 
               RowBox[{"x", ",", "y"}], "}"}]}], "]"}]}], "}"}], ",", 
          RowBox[{"{", 
           RowBox[{"x", ",", 
            RowBox[{"Max", "[", 
             RowBox[{
              RowBox[{
               RowBox[{"Min", "[", 
                RowBox[{
                 RowBox[{"Mean", "[", "dd11", "]"}], ",", 
                 RowBox[{"Mean", "[", "dd12", "]"}]}], "]"}], "-", 
               RowBox[{"3", 
                RowBox[{"Max", "[", 
                 RowBox[{
                  RowBox[{"StandardDeviation", "[", "dd11", "]"}], ",", 
                  RowBox[{"StandardDeviation", "[", "dd12", "]"}]}], 
                 "]"}]}]}], ",", "0"}], "]"}], ",", 
            RowBox[{
             RowBox[{"Max", "[", 
              RowBox[{
               RowBox[{"Mean", "[", "dd11", "]"}], ",", 
               RowBox[{"Mean", "[", "dd12", "]"}]}], "]"}], "+", 
             RowBox[{"3", 
              RowBox[{"Max", "[", 
               RowBox[{
                RowBox[{"StandardDeviation", "[", "dd11", "]"}], ",", 
                RowBox[{"StandardDeviation", "[", "dd12", "]"}]}], 
               "]"}]}]}]}], "}"}], ",", 
          RowBox[{"{", 
           RowBox[{"y", ",", 
            RowBox[{"Max", "[", 
             RowBox[{
              RowBox[{
               RowBox[{"Min", "[", 
                RowBox[{
                 RowBox[{"Mean", "[", "dd21", "]"}], ",", 
                 RowBox[{"Mean", "[", "dd22", "]"}]}], "]"}], "-", 
               RowBox[{"3", 
                RowBox[{"Max", "[", 
                 RowBox[{
                  RowBox[{"StandardDeviation", "[", "dd21", "]"}], ",", 
                  RowBox[{"StandardDeviation", "[", "dd22", "]"}]}], 
                 "]"}]}]}], ",", "0"}], "]"}], ",", 
            RowBox[{
             RowBox[{"Max", "[", 
              RowBox[{
               RowBox[{"Mean", "[", "dd21", "]"}], ",", 
               RowBox[{"Mean", "[", "dd22", "]"}]}], "]"}], "+", 
             RowBox[{"3", 
              RowBox[{"Max", "[", 
               RowBox[{
                RowBox[{"StandardDeviation", "[", "dd21", "]"}], ",", 
                RowBox[{"StandardDeviation", "[", "dd22", "]"}]}], 
               "]"}]}]}]}], "}"}], ",", 
          RowBox[{"PlotRange", "->", "All"}], ",", 
          RowBox[{"PlotPoints", "->", "100"}], ",", 
          RowBox[{"ImageSize", "->", "550"}], ",", 
          RowBox[{"Exclusions", "->", "None"}], ",", 
          RowBox[{"AxesLabel", "->", 
           RowBox[{"{", 
            RowBox[{
            "\"\<1st measurand\>\"", ",", "\"\< 2nd measurand\>\"", ",", 
             "\"\<\>\""}], "}"}]}], ",", 
          RowBox[{
          "PlotLabel", "->", 
           "\"\<bivariate PDF of 1st & 2nd measurands in diseased\>\""}], ",", 
          RowBox[{"PlotLegends", "->", 
           RowBox[{"Placed", "[", 
            RowBox[{
             RowBox[{"{", 
              RowBox[{
              "\"\<1st kernel PDF\>\"", ",", "\"\<2nd kernel PDF\>\""}], 
              "}"}], ",", "Below"}], "]"}]}], ",", 
          RowBox[{"PlotPoints", "->", "100"}], ",", 
          RowBox[{"PlotTheme", "->", "\"\<Scientific\>\""}]}], "]"}]}], "]"}],
       ",", "\[IndentingNewLine]", "2", ",", 
      RowBox[{"Switch", "[", 
       RowBox[{"msr", ",", "1", ",", "\[IndentingNewLine]", 
        RowBox[{"Plot", "[", 
         RowBox[{
          RowBox[{"{", 
           RowBox[{
            RowBox[{"PDF", "[", 
             RowBox[{"dnd11", ",", "x"}], "]"}], ",", 
            RowBox[{"PDF", "[", 
             RowBox[{"dnd12", ",", "x"}], "]"}]}], "}"}], ",", 
          RowBox[{"{", 
           RowBox[{"x", ",", 
            RowBox[{"Max", "[", 
             RowBox[{
              RowBox[{
               RowBox[{"Min", "[", 
                RowBox[{
                 RowBox[{"Mean", "[", "dnd11", "]"}], ",", 
                 RowBox[{"Mean", "[", "dnd12", "]"}]}], "]"}], "-", 
               RowBox[{"3", 
                RowBox[{"Max", "[", 
                 RowBox[{
                  RowBox[{"StandardDeviation", "[", "dnd11", "]"}], ",", 
                  RowBox[{"StandardDeviation", "[", "dnd12", "]"}]}], 
                 "]"}]}]}], ",", "0"}], "]"}], ",", 
            RowBox[{
             RowBox[{"Max", "[", 
              RowBox[{
               RowBox[{"Mean", "[", "dnd11", "]"}], ",", 
               RowBox[{"Mean", "[", "dnd12", "]"}]}], "]"}], "+", 
             RowBox[{"3", 
              RowBox[{"Max", "[", 
               RowBox[{
                RowBox[{"StandardDeviation", "[", "dnd11", "]"}], ",", 
                RowBox[{"StandardDeviation", "[", "dnd12", "]"}]}], 
               "]"}]}]}]}], "}"}], ",", 
          RowBox[{"PlotRange", "->", "All"}], ",", " ", 
          RowBox[{"ImageSize", "->", "550"}], ",", 
          RowBox[{"Exclusions", "\[Rule]", "None"}], ",", 
          RowBox[{
          "PlotLabel", "->", "\"\<PDF of 1st measurand in nondiseased\>\""}], 
          ",", 
          RowBox[{"PlotLegends", "->", 
           RowBox[{"Placed", "[", 
            RowBox[{
             RowBox[{"{", 
              RowBox[{
              "\"\<1st kernel PDF\>\"", ",", "\"\<2nd kernel PDF\>\""}], 
              "}"}], ",", "Below"}], "]"}]}], ",", 
          RowBox[{"PlotTheme", "->", "\"\<Scientific\>\""}], ",", 
          RowBox[{"Filling", "->", "Bottom"}]}], "]"}], ",", "2", ",", "\n", 
        "\t", 
        RowBox[{"Plot", "[", 
         RowBox[{
          RowBox[{"{", 
           RowBox[{
            RowBox[{"PDF", "[", 
             RowBox[{"dnd21", ",", "x"}], "]"}], ",", 
            RowBox[{"PDF", "[", 
             RowBox[{"dnd22", ",", "x"}], "]"}]}], "}"}], ",", 
          RowBox[{"{", 
           RowBox[{"x", ",", 
            RowBox[{"Max", "[", 
             RowBox[{
              RowBox[{
               RowBox[{"Min", "[", 
                RowBox[{
                 RowBox[{"Mean", "[", "dnd21", "]"}], ",", 
                 RowBox[{"Mean", "[", "dnd22", "]"}]}], "]"}], "-", 
               RowBox[{"3", 
                RowBox[{"Max", "[", 
                 RowBox[{
                  RowBox[{"StandardDeviation", "[", "dnd21", "]"}], ",", 
                  RowBox[{"StandardDeviation", "[", "dnd22", "]"}]}], 
                 "]"}]}]}], ",", "0"}], "]"}], ",", 
            RowBox[{
             RowBox[{"Max", "[", 
              RowBox[{
               RowBox[{"Mean", "[", "dnd21", "]"}], ",", 
               RowBox[{"Mean", "[", "dnd22", "]"}]}], "]"}], "+", 
             RowBox[{"3", 
              RowBox[{"Max", "[", 
               RowBox[{
                RowBox[{"StandardDeviation", "[", "dnd21", "]"}], ",", 
                RowBox[{"StandardDeviation", "[", "dnd22", "]"}]}], 
               "]"}]}]}]}], "}"}], ",", 
          RowBox[{"PlotRange", "->", "All"}], ",", " ", 
          RowBox[{"ImageSize", "->", "550"}], ",", 
          RowBox[{"Exclusions", "\[Rule]", "None"}], ",", 
          RowBox[{
          "PlotLabel", "->", "\"\<PDF of 2nd measurand in nondiseased\>\""}], 
          ",", 
          RowBox[{"PlotLegends", "->", 
           RowBox[{"Placed", "[", 
            RowBox[{
             RowBox[{"{", 
              RowBox[{"\"\<1st kernel\>\"", ",", "\"\<2nd kernel\>\""}], 
              "}"}], ",", "Below"}], "]"}]}], ",", 
          RowBox[{"PlotTheme", "->", "\"\<Scientific\>\""}], ",", 
          RowBox[{"Filling", "->", "Bottom"}]}], "]"}], ",", "3", ",", 
        "\[IndentingNewLine]", 
        RowBox[{"Plot3D", "[", 
         RowBox[{
          RowBox[{"{", 
           RowBox[{
            RowBox[{"PDF", "[", 
             RowBox[{"dnd121", ",", 
              RowBox[{"{", 
               RowBox[{"x", ",", "y"}], "}"}]}], "]"}], ",", 
            RowBox[{"PDF", "[", 
             RowBox[{"dnd122", ",", 
              RowBox[{"{", 
               RowBox[{"x", ",", "y"}], "}"}]}], "]"}]}], "}"}], ",", 
          RowBox[{"{", 
           RowBox[{"x", ",", 
            RowBox[{"Max", "[", 
             RowBox[{
              RowBox[{
               RowBox[{"Min", "[", 
                RowBox[{
                 RowBox[{"Mean", "[", "dnd11", "]"}], ",", 
                 RowBox[{"Mean", "[", "dnd12", "]"}]}], "]"}], "-", 
               RowBox[{"3", 
                RowBox[{"Max", "[", 
                 RowBox[{
                  RowBox[{"StandardDeviation", "[", "dnd11", "]"}], ",", 
                  RowBox[{"StandardDeviation", "[", "dnd12", "]"}]}], 
                 "]"}]}]}], ",", "0"}], "]"}], ",", 
            RowBox[{
             RowBox[{"Max", "[", 
              RowBox[{
               RowBox[{"Mean", "[", "dnd11", "]"}], ",", 
               RowBox[{"Mean", "[", "dnd12", "]"}]}], "]"}], "+", 
             RowBox[{"3", 
              RowBox[{"Max", "[", 
               RowBox[{
                RowBox[{"StandardDeviation", "[", "dnd11", "]"}], ",", 
                RowBox[{"StandardDeviation", "[", "dnd12", "]"}]}], 
               "]"}]}]}]}], "}"}], ",", 
          RowBox[{"{", 
           RowBox[{"y", ",", 
            RowBox[{"Max", "[", 
             RowBox[{
              RowBox[{
               RowBox[{"Min", "[", 
                RowBox[{
                 RowBox[{"Mean", "[", "dnd21", "]"}], ",", 
                 RowBox[{"Mean", "[", "dnd22", "]"}]}], "]"}], "-", 
               RowBox[{"3", 
                RowBox[{"Max", "[", 
                 RowBox[{
                  RowBox[{"StandardDeviation", "[", "dnd21", "]"}], ",", 
                  RowBox[{"StandardDeviation", "[", "dnd22", "]"}]}], 
                 "]"}]}]}], ",", "0"}], "]"}], ",", 
            RowBox[{
             RowBox[{"Max", "[", 
              RowBox[{
               RowBox[{"Mean", "[", "dnd21", "]"}], ",", 
               RowBox[{"Mean", "[", "dnd22", "]"}]}], "]"}], "+", 
             RowBox[{"3", 
              RowBox[{"Max", "[", 
               RowBox[{
                RowBox[{"StandardDeviation", "[", "dnd21", "]"}], ",", 
                RowBox[{"StandardDeviation", "[", "dnd22", "]"}]}], 
               "]"}]}]}]}], "}"}], ",", 
          RowBox[{"PlotRange", "->", "All"}], ",", 
          RowBox[{"PlotPoints", "->", "100"}], ",", 
          RowBox[{"ImageSize", "->", "550"}], ",", 
          RowBox[{"Exclusions", "->", "None"}], ",", 
          RowBox[{"AxesLabel", "->", 
           RowBox[{"{", 
            RowBox[{
            "\"\<1st measurand\>\"", ",", "\"\< 2nd measurand\>\"", ",", 
             "\"\<\>\""}], "}"}]}], ",", 
          RowBox[{
          "PlotLabel", "->", 
           "\"\<bivariate PDF of 1st & 2nd measurands in nondiseased\>\""}], 
          ",", 
          RowBox[{"PlotLegends", "->", 
           RowBox[{"Placed", "[", 
            RowBox[{
             RowBox[{"{", 
              RowBox[{
              "\"\<1st kernel PDF\>\"", ",", "\"\<2nd kernel PDF\>\""}], 
              "}"}], ",", "Below"}], "]"}]}], ",", 
          RowBox[{"PlotPoints", "->", "100"}], ",", 
          RowBox[{"PlotTheme", "->", "\"\<Scientific\>\""}]}], "]"}]}], "]"}],
       ",", "\[IndentingNewLine]", "3", ",", 
      RowBox[{"Switch", "[", 
       RowBox[{"msr", ",", "1", ",", "\[IndentingNewLine]", 
        RowBox[{"Plot", "[", 
         RowBox[{
          RowBox[{"{", 
           RowBox[{
            RowBox[{"vd", " ", 
             RowBox[{"PDF", "[", 
              RowBox[{"dd11", ",", "x"}], "]"}]}], ",", 
            RowBox[{"vd", " ", 
             RowBox[{"PDF", "[", 
              RowBox[{"dd12", ",", "x"}], "]"}]}], ",", 
            RowBox[{
             RowBox[{"(", 
              RowBox[{"1", "-", "vd"}], ")"}], 
             RowBox[{"PDF", "[", 
              RowBox[{"dnd11", ",", "x"}], "]"}]}], ",", 
            RowBox[{
             RowBox[{"(", 
              RowBox[{"1", "-", "vd"}], ")"}], 
             RowBox[{"PDF", "[", 
              RowBox[{"dnd12", ",", "x"}], "]"}]}]}], "}"}], ",", 
          RowBox[{"{", 
           RowBox[{"x", ",", 
            RowBox[{"Max", "[", 
             RowBox[{
              RowBox[{
               RowBox[{"Min", "[", 
                RowBox[{
                 RowBox[{"Mean", "[", "dd11", "]"}], ",", 
                 RowBox[{"Mean", "[", "dd12", "]"}], ",", 
                 RowBox[{"Mean", "[", "dnd11", "]"}], ",", 
                 RowBox[{"Mean", "[", "dnd12", "]"}]}], "]"}], "-", 
               RowBox[{"3", 
                RowBox[{"Max", "[", 
                 RowBox[{
                  RowBox[{"StandardDeviation", "[", "dd11", "]"}], ",", 
                  RowBox[{"StandardDeviation", "[", "dd12", "]"}], ",", 
                  RowBox[{"StandardDeviation", "[", "dnd11", "]"}], ",", 
                  RowBox[{"StandardDeviation", "[", "dnd12", "]"}]}], 
                 "]"}]}]}], ",", "0"}], "]"}], ",", 
            RowBox[{
             RowBox[{"Max", "[", 
              RowBox[{
               RowBox[{"Mean", "[", "dd11", "]"}], ",", 
               RowBox[{"Mean", "[", "dd12", "]"}], ",", 
               RowBox[{"Mean", "[", "dnd11", "]"}], ",", 
               RowBox[{"Mean", "[", "dnd12", "]"}]}], "]"}], "+", 
             RowBox[{"3", 
              RowBox[{"Max", "[", 
               RowBox[{
                RowBox[{"StandardDeviation", "[", "dd11", "]"}], ",", 
                RowBox[{"StandardDeviation", "[", "dd12", "]"}], ",", 
                RowBox[{"StandardDeviation", "[", "dnd11", "]"}], ",", 
                RowBox[{"StandardDeviation", "[", "dnd12", "]"}]}], 
               "]"}]}]}]}], "}"}], ",", 
          RowBox[{"PlotRange", "->", "All"}], ",", " ", 
          RowBox[{"ImageSize", "->", "550"}], ",", 
          RowBox[{"Exclusions", "\[Rule]", "None"}], ",", 
          RowBox[{"PlotLabel", "->", "\"\<PDF of 1st measurand\>\""}], ",", 
          RowBox[{"PlotLegends", "->", 
           RowBox[{"Placed", "[", 
            RowBox[{
             RowBox[{"{", 
              RowBox[{
              "\"\<1st kernel PDF: diseased\>\"", ",", 
               "\"\<2nd kernel PDF: diseased\>\"", ",", 
               "\"\<1st kernel PDF: nondiseased\>\"", ",", 
               "\"\<2nd kernel PDF: nondiseased\>\""}], "}"}], ",", "Below"}],
             "]"}]}], ",", 
          RowBox[{"PlotTheme", "->", "\"\<Scientific\>\""}], ",", 
          RowBox[{"Filling", "->", "Bottom"}]}], "]"}], ",", "2", ",", "\n", 
        "\t", 
        RowBox[{"Plot", "[", 
         RowBox[{
          RowBox[{"{", 
           RowBox[{
            RowBox[{"vd", " ", 
             RowBox[{"PDF", "[", 
              RowBox[{"dd21", ",", "x"}], "]"}]}], ",", 
            RowBox[{"vd", " ", 
             RowBox[{"PDF", "[", 
              RowBox[{"dd22", ",", "x"}], "]"}]}], ",", 
            RowBox[{
             RowBox[{"(", 
              RowBox[{"1", "-", "vd"}], ")"}], 
             RowBox[{"PDF", "[", 
              RowBox[{"dnd21", ",", "x"}], "]"}]}], ",", 
            RowBox[{
             RowBox[{"(", 
              RowBox[{"1", "-", "vd"}], ")"}], 
             RowBox[{"PDF", "[", 
              RowBox[{"dnd22", ",", "x"}], "]"}]}]}], "}"}], ",", 
          RowBox[{"{", 
           RowBox[{"x", ",", 
            RowBox[{"Max", "[", 
             RowBox[{
              RowBox[{
               RowBox[{"Min", "[", 
                RowBox[{
                 RowBox[{"Mean", "[", "dd21", "]"}], ",", 
                 RowBox[{"Mean", "[", "dd22", "]"}], ",", 
                 RowBox[{"Mean", "[", "dnd21", "]"}], ",", 
                 RowBox[{"Mean", "[", "dnd22", "]"}]}], "]"}], "-", 
               RowBox[{"3", 
                RowBox[{"Max", "[", 
                 RowBox[{
                  RowBox[{"StandardDeviation", "[", "dd21", "]"}], ",", 
                  RowBox[{"StandardDeviation", "[", "dd22", "]"}], ",", 
                  RowBox[{"StandardDeviation", "[", "dnd21", "]"}], ",", 
                  RowBox[{"StandardDeviation", "[", "dnd22", "]"}]}], 
                 "]"}]}]}], ",", "0"}], "]"}], ",", 
            RowBox[{
             RowBox[{"Max", "[", 
              RowBox[{
               RowBox[{"Mean", "[", "dd21", "]"}], ",", 
               RowBox[{"Mean", "[", "dd22", "]"}], ",", 
               RowBox[{"Mean", "[", "dnd21", "]"}], ",", 
               RowBox[{"Mean", "[", "dnd22", "]"}]}], "]"}], "+", 
             RowBox[{"3", 
              RowBox[{"Max", "[", 
               RowBox[{
                RowBox[{"StandardDeviation", "[", "dd21", "]"}], ",", 
                RowBox[{"StandardDeviation", "[", "dd22", "]"}], ",", 
                RowBox[{"StandardDeviation", "[", "dnd21", "]"}], ",", 
                RowBox[{"StandardDeviation", "[", "dnd22", "]"}]}], 
               "]"}]}]}]}], "}"}], ",", 
          RowBox[{"PlotRange", "->", "All"}], ",", " ", 
          RowBox[{"ImageSize", "->", "550"}], ",", 
          RowBox[{"Exclusions", "\[Rule]", "None"}], ",", 
          RowBox[{"PlotLabel", "->", "\"\<PDF of 2nd measurand\>\""}], ",", 
          RowBox[{"PlotLegends", "->", 
           RowBox[{"Placed", "[", 
            RowBox[{
             RowBox[{"{", 
              RowBox[{
              "\"\<1st kernel PDF: diseased\>\"", ",", 
               "\"\<2nd kernel PDF: diseased\>\"", ",", 
               "\"\<1st kernel PDF: nondiseased\>\"", ",", 
               "\"\<2nd kernel PDF: nondiseased\>\""}], "}"}], ",", "Below"}],
             "]"}]}], ",", 
          RowBox[{"PlotTheme", "->", "\"\<Scientific\>\""}], ",", 
          RowBox[{"Filling", "->", "Bottom"}]}], "]"}], ",", "3", ",", 
        "\[IndentingNewLine]", 
        RowBox[{"Plot3D", "[", 
         RowBox[{
          RowBox[{"{", 
           RowBox[{
            RowBox[{"vd", " ", 
             RowBox[{"PDF", "[", 
              RowBox[{"dd121", ",", 
               RowBox[{"{", 
                RowBox[{"x", ",", "y"}], "}"}]}], "]"}]}], ",", 
            RowBox[{"vd", " ", 
             RowBox[{"PDF", "[", 
              RowBox[{"dd122", ",", 
               RowBox[{"{", 
                RowBox[{"x", ",", "y"}], "}"}]}], "]"}]}], ",", 
            RowBox[{
             RowBox[{"(", 
              RowBox[{"1", "-", "vd"}], ")"}], 
             RowBox[{"PDF", "[", 
              RowBox[{"dnd121", ",", 
               RowBox[{"{", 
                RowBox[{"x", ",", "y"}], "}"}]}], "]"}]}], ",", 
            RowBox[{
             RowBox[{"(", 
              RowBox[{"1", "-", "vd"}], ")"}], 
             RowBox[{"PDF", "[", 
              RowBox[{"dnd122", ",", 
               RowBox[{"{", 
                RowBox[{"x", ",", "y"}], "}"}]}], "]"}]}]}], "}"}], ",", 
          RowBox[{"{", 
           RowBox[{"x", ",", 
            RowBox[{"Max", "[", 
             RowBox[{
              RowBox[{
               RowBox[{"Min", "[", 
                RowBox[{
                 RowBox[{"Mean", "[", "dd11", "]"}], ",", 
                 RowBox[{"Mean", "[", "dd12", "]"}], ",", 
                 RowBox[{"Mean", "[", "dnd11", "]"}], ",", 
                 RowBox[{"Mean", "[", "dnd12", "]"}]}], "]"}], "-", 
               RowBox[{"3", 
                RowBox[{"Max", "[", 
                 RowBox[{
                  RowBox[{"StandardDeviation", "[", "dd11", "]"}], ",", 
                  RowBox[{"StandardDeviation", "[", "dd12", "]"}], ",", 
                  RowBox[{"StandardDeviation", "[", "dnd11", "]"}], ",", 
                  RowBox[{"StandardDeviation", "[", "dnd12", "]"}]}], 
                 "]"}]}]}], ",", "0"}], "]"}], ",", 
            RowBox[{
             RowBox[{"Max", "[", 
              RowBox[{
               RowBox[{"Mean", "[", "dd11", "]"}], ",", 
               RowBox[{"Mean", "[", "dd12", "]"}], ",", 
               RowBox[{"Mean", "[", "dnd11", "]"}], ",", 
               RowBox[{"Mean", "[", "dnd12", "]"}]}], "]"}], "+", 
             RowBox[{"3", 
              RowBox[{"Max", "[", 
               RowBox[{
                RowBox[{"StandardDeviation", "[", "dd11", "]"}], ",", 
                RowBox[{"StandardDeviation", "[", "dd12", "]"}], ",", 
                RowBox[{"StandardDeviation", "[", "dnd11", "]"}], ",", 
                RowBox[{"StandardDeviation", "[", "dnd12", "]"}]}], 
               "]"}]}]}]}], "}"}], ",", 
          RowBox[{"{", 
           RowBox[{"y", ",", 
            RowBox[{"Max", "[", 
             RowBox[{
              RowBox[{
               RowBox[{"Min", "[", 
                RowBox[{
                 RowBox[{"Mean", "[", "dd21", "]"}], ",", 
                 RowBox[{"Mean", "[", "dd22", "]"}], ",", 
                 RowBox[{"Mean", "[", "dnd21", "]"}], ",", 
                 RowBox[{"Mean", "[", "dnd22", "]"}]}], "]"}], "-", 
               RowBox[{"3", 
                RowBox[{"Max", "[", 
                 RowBox[{
                  RowBox[{"StandardDeviation", "[", "dd21", "]"}], ",", 
                  RowBox[{"StandardDeviation", "[", "dd22", "]"}], ",", 
                  RowBox[{"StandardDeviation", "[", "dnd21", "]"}], ",", 
                  RowBox[{"StandardDeviation", "[", "dnd22", "]"}]}], 
                 "]"}]}]}], ",", "0"}], "]"}], ",", 
            RowBox[{
             RowBox[{"Max", "[", 
              RowBox[{
               RowBox[{"Mean", "[", "dd21", "]"}], ",", 
               RowBox[{"Mean", "[", "dd22", "]"}], ",", 
               RowBox[{"Mean", "[", "dnd21", "]"}], ",", 
               RowBox[{"Mean", "[", "dnd22", "]"}]}], "]"}], "+", 
             RowBox[{"3", 
              RowBox[{"Max", "[", 
               RowBox[{
                RowBox[{"StandardDeviation", "[", "dd21", "]"}], ",", 
                RowBox[{"StandardDeviation", "[", "dd22", "]"}], ",", 
                RowBox[{"StandardDeviation", "[", "dnd21", "]"}], ",", 
                RowBox[{"StandardDeviation", "[", "dnd22", "]"}]}], 
               "]"}]}]}]}], "}"}], ",", 
          RowBox[{"PlotRange", "->", "Full"}], ",", 
          RowBox[{"PlotPoints", "->", "100"}], ",", 
          RowBox[{"ImageSize", "->", "550"}], ",", 
          RowBox[{"Exclusions", "->", "None"}], ",", 
          RowBox[{"AxesLabel", "->", 
           RowBox[{"{", 
            RowBox[{
            "\"\<1st measurand\>\"", ",", "\"\< 2nd measurand\>\"", ",", 
             "\"\<\>\""}], "}"}]}], ",", 
          RowBox[{
          "PlotLabel", "->", 
           "\"\<bivariate PDF of 1st & 2nd measurands\>\""}], ",", 
          RowBox[{"PlotLegends", "->", 
           RowBox[{"Placed", "[", 
            RowBox[{
             RowBox[{"{", 
              RowBox[{
              "\"\<1st kernel PDF: diseased\>\"", ",", 
               "\"\<2nd kernel PDF: diseased\>\"", ",", 
               "\"\<1st kernel PDF: nondiseased\>\"", ",", 
               "\"\<2nd kernel PDF: nondiseased\>\""}], "}"}], ",", "Below"}],
             "]"}]}], ",", 
          RowBox[{"PlotPoints", "->", "100"}], ",", 
          RowBox[{"PlotTheme", "->", "\"\<Scientific\>\""}]}], "]"}]}], 
       "]"}]}], "]"}], "]"}]}], ";"}], "\[IndentingNewLine]", 
 RowBox[{
  RowBox[{
   RowBox[{"hcpdf2", "[", 
    RowBox[{
    "vd_", ",", "dd11_", ",", "dd12_", ",", "dd21_", ",", "dd22_", ",", 
     "dd121_", ",", "dd122_", ",", "dnd11_", ",", "dnd12_", ",", "dnd21_", 
     ",", "dnd22_", ",", "dnd121_", ",", "dnd122_", ",", "msr_", ",", 
     "pop_"}], "]"}], ":=", "\[IndentingNewLine]", 
   RowBox[{"Switch", "[", 
    RowBox[{"pop", ",", "1", ",", 
     RowBox[{"Switch", "[", 
      RowBox[{"msr", ",", "1", ",", "\[IndentingNewLine]", 
       RowBox[{"Show", "[", 
        RowBox[{
         RowBox[{"Histogram", "[", 
          RowBox[{"d1", ",", "\"\<Knuth\>\"", ",", "\"\<PDF\>\"", ",", 
           RowBox[{"ImageSize", "->", "550"}]}], "]"}], ",", 
         RowBox[{"Plot", "[", 
          RowBox[{
           RowBox[{"{", 
            RowBox[{
             RowBox[{"PDF", "[", 
              RowBox[{"dd11", ",", "x"}], "]"}], ",", 
             RowBox[{"PDF", "[", 
              RowBox[{"dd12", ",", "x"}], "]"}]}], "}"}], ",", 
           RowBox[{"{", 
            RowBox[{"x", ",", 
             RowBox[{"Min", "[", 
              RowBox[{
               RowBox[{"Max", "[", 
                RowBox[{
                 RowBox[{
                  RowBox[{"Min", "[", 
                   RowBox[{
                    RowBox[{"Mean", "[", "dd11", "]"}], ",", 
                    RowBox[{"Mean", "[", "dd12", "]"}]}], "]"}], "-", 
                  RowBox[{"3", 
                   RowBox[{"Max", "[", 
                    RowBox[{
                    RowBox[{"StandardDeviation", "[", "dd11", "]"}], ",", 
                    RowBox[{"StandardDeviation", "[", "dd12", "]"}]}], 
                    "]"}]}]}], ",", "0"}], "]"}], ",", "mid1"}], "]"}], ",", 
             RowBox[{"Max", "[", 
              RowBox[{
               RowBox[{
                RowBox[{"Max", "[", 
                 RowBox[{
                  RowBox[{"Mean", "[", "dd11", "]"}], ",", 
                  RowBox[{"Mean", "[", "dd12", "]"}]}], "]"}], "+", 
                RowBox[{"3", 
                 RowBox[{"Max", "[", 
                  RowBox[{
                   RowBox[{"StandardDeviation", "[", "dd11", "]"}], ",", 
                   RowBox[{"StandardDeviation", "[", "dd12", "]"}]}], 
                  "]"}]}]}], ",", "mad1"}], "]"}]}], "}"}], ",", 
           RowBox[{"PlotRange", "->", "All"}], ",", " ", 
           RowBox[{"ImageSize", "->", "550"}], ",", 
           RowBox[{"Exclusions", "\[Rule]", "None"}], ",", 
           RowBox[{
           "PlotLabel", "->", "\"\<PDF of 1st measurand in diseased\>\""}], 
           ",", 
           RowBox[{"PlotLegends", "->", 
            RowBox[{"Placed", "[", 
             RowBox[{
              RowBox[{"{", 
               RowBox[{
               "\"\<1st kernel PDF\>\"", ",", "\"\<2nd kernel PDF\>\""}], 
               "}"}], ",", "Below"}], "]"}]}], ",", 
           RowBox[{"PlotTheme", "->", "\"\<Scientific\>\""}], ",", 
           RowBox[{"Filling", "->", "Bottom"}]}], "]"}]}], "]"}], ",", "2", 
       ",", "\n", "\t", 
       RowBox[{"Show", "[", 
        RowBox[{
         RowBox[{"Histogram", "[", 
          RowBox[{"d2", ",", "\"\<Knuth\>\"", ",", "\"\<PDF\>\"", ",", 
           RowBox[{"ImageSize", "->", "550"}]}], "]"}], ",", 
         RowBox[{"Plot", "[", 
          RowBox[{
           RowBox[{"{", 
            RowBox[{
             RowBox[{"PDF", "[", 
              RowBox[{"dd21", ",", "x"}], "]"}], ",", " ", 
             RowBox[{"PDF", "[", 
              RowBox[{"dd22", ",", "x"}], "]"}]}], "}"}], ",", 
           RowBox[{"{", 
            RowBox[{"x", ",", 
             RowBox[{"Min", "[", 
              RowBox[{
               RowBox[{"Max", "[", 
                RowBox[{
                 RowBox[{
                  RowBox[{"Min", "[", 
                   RowBox[{
                    RowBox[{"Mean", "[", "dd21", "]"}], ",", 
                    RowBox[{"Mean", "[", "dd22", "]"}]}], "]"}], "-", 
                  RowBox[{"3", 
                   RowBox[{"Max", "[", 
                    RowBox[{
                    RowBox[{"StandardDeviation", "[", "dd21", "]"}], ",", 
                    RowBox[{"StandardDeviation", "[", "dd22", "]"}]}], 
                    "]"}]}]}], ",", "0"}], "]"}], ",", "mid2"}], "]"}], ",", 
             RowBox[{"Max", "[", 
              RowBox[{
               RowBox[{
                RowBox[{"Max", "[", 
                 RowBox[{
                  RowBox[{"Mean", "[", "dd21", "]"}], ",", 
                  RowBox[{"Mean", "[", "dd22", "]"}]}], "]"}], "+", 
                RowBox[{"3", 
                 RowBox[{"Max", "[", 
                  RowBox[{
                   RowBox[{"StandardDeviation", "[", "dd21", "]"}], ",", 
                   RowBox[{"StandardDeviation", "[", "dd22", "]"}]}], 
                  "]"}]}]}], ",", "mad2"}], "]"}]}], "}"}], ",", 
           RowBox[{"PlotRange", "->", "All"}], ",", " ", 
           RowBox[{"ImageSize", "->", "550"}], ",", 
           RowBox[{"Exclusions", "\[Rule]", "None"}], ",", 
           RowBox[{
           "PlotLabel", "->", "\"\<PDF of 2nd measurand in diseased\>\""}], 
           ",", 
           RowBox[{"PlotLegends", "->", 
            RowBox[{"Placed", "[", 
             RowBox[{
              RowBox[{"{", 
               RowBox[{
               "\"\<1st kernel PDF\>\"", ",", "\"\<2nd kernel PDF\>\""}], 
               "}"}], ",", "Below"}], "]"}]}], ",", 
           RowBox[{"PlotTheme", "->", "\"\<Scientific\>\""}], ",", 
           RowBox[{"Filling", "->", "Bottom"}]}], "]"}]}], "]"}], ",", "3", 
       ",", "\[IndentingNewLine]", 
       RowBox[{"Show", "[", 
        RowBox[{
         RowBox[{"Histogram3D", "[", 
          RowBox[{"d12", ",", "\"\<Knuth\>\"", ",", "\"\<PDF\>\"", ",", 
           RowBox[{"ImageSize", "->", "550"}]}], "]"}], ",", 
         RowBox[{"Plot3D", "[", 
          RowBox[{
           RowBox[{"{", 
            RowBox[{
             RowBox[{"PDF", "[", 
              RowBox[{"dd121", ",", 
               RowBox[{"{", 
                RowBox[{"x", ",", "y"}], "}"}]}], "]"}], ",", 
             RowBox[{"PDF", "[", 
              RowBox[{"dd122", ",", 
               RowBox[{"{", 
                RowBox[{"x", ",", "y"}], "}"}]}], "]"}]}], "}"}], ",", 
           RowBox[{"{", 
            RowBox[{"x", ",", 
             RowBox[{"Min", "[", 
              RowBox[{
               RowBox[{"Max", "[", 
                RowBox[{
                 RowBox[{
                  RowBox[{"Min", "[", 
                   RowBox[{
                    RowBox[{"Mean", "[", "dd11", "]"}], ",", 
                    RowBox[{"Mean", "[", "dd12", "]"}]}], "]"}], "-", 
                  RowBox[{"3", 
                   RowBox[{"Max", "[", 
                    RowBox[{
                    RowBox[{"StandardDeviation", "[", "dd11", "]"}], ",", 
                    RowBox[{"StandardDeviation", "[", "dd12", "]"}]}], 
                    "]"}]}]}], ",", "0"}], "]"}], ",", "mid1"}], "]"}], ",", 
             RowBox[{"Max", "[", 
              RowBox[{
               RowBox[{
                RowBox[{"Max", "[", 
                 RowBox[{
                  RowBox[{"Mean", "[", "dd11", "]"}], ",", 
                  RowBox[{"Mean", "[", "dd12", "]"}]}], "]"}], "+", 
                RowBox[{"3", 
                 RowBox[{"Max", "[", 
                  RowBox[{
                   RowBox[{"StandardDeviation", "[", "dd11", "]"}], ",", 
                   RowBox[{"StandardDeviation", "[", "dd12", "]"}]}], 
                  "]"}]}]}], ",", "mad1"}], "]"}]}], "}"}], ",", 
           RowBox[{"{", 
            RowBox[{"y", ",", 
             RowBox[{"Min", "[", 
              RowBox[{
               RowBox[{"Max", "[", 
                RowBox[{
                 RowBox[{
                  RowBox[{"Min", "[", 
                   RowBox[{
                    RowBox[{"Mean", "[", "dd21", "]"}], ",", 
                    RowBox[{"Mean", "[", "dd22", "]"}]}], "]"}], "-", 
                  RowBox[{"3", 
                   RowBox[{"Max", "[", 
                    RowBox[{
                    RowBox[{"StandardDeviation", "[", "dd21", "]"}], ",", 
                    RowBox[{"StandardDeviation", "[", "dd22", "]"}]}], 
                    "]"}]}]}], ",", "0"}], "]"}], ",", "mid2"}], "]"}], ",", 
             RowBox[{"Max", "[", 
              RowBox[{
               RowBox[{
                RowBox[{"Max", "[", 
                 RowBox[{
                  RowBox[{"Mean", "[", "dd21", "]"}], ",", 
                  RowBox[{"Mean", "[", "dd22", "]"}]}], "]"}], "+", 
                RowBox[{"3", 
                 RowBox[{"Max", "[", 
                  RowBox[{
                   RowBox[{"StandardDeviation", "[", "dd21", "]"}], ",", 
                   RowBox[{"StandardDeviation", "[", "dd22", "]"}]}], 
                  "]"}]}]}], ",", "mad2"}], "]"}]}], "}"}], ",", 
           RowBox[{"PlotRange", "->", "All"}], ",", 
           RowBox[{"PlotPoints", "->", "100"}], ",", 
           RowBox[{"ImageSize", "->", "550"}], ",", 
           RowBox[{"Exclusions", "->", "None"}], ",", 
           RowBox[{"AxesLabel", "->", 
            RowBox[{"{", 
             RowBox[{
             "\"\<1st measurand\>\"", ",", "\"\< 2nd measurand\>\"", ",", 
              "\"\<\>\""}], "}"}]}], ",", 
           RowBox[{
           "PlotLabel", "->", 
            "\"\<bivariate PDF of 1st & 2nd measurands in diseased\>\""}], 
           ",", 
           RowBox[{"PlotLegends", "->", 
            RowBox[{"Placed", "[", 
             RowBox[{
              RowBox[{"{", 
               RowBox[{
               "\"\<1st kernel PDF\>\"", ",", "\"\<2nd kernel PDF\>\""}], 
               "}"}], ",", "Below"}], "]"}]}], ",", 
           RowBox[{"PlotPoints", "->", "100"}], ",", 
           RowBox[{"PlotTheme", "->", "\"\<Scientific\>\""}]}], "]"}]}], 
        "]"}]}], "]"}], ",", "\[IndentingNewLine]", "2", ",", 
     RowBox[{"Switch", "[", 
      RowBox[{"msr", ",", "1", ",", "\[IndentingNewLine]", 
       RowBox[{"Show", "[", 
        RowBox[{
         RowBox[{"Histogram", "[", 
          RowBox[{"nd1", ",", "\"\<Knuth\>\"", ",", "\"\<PDF\>\"", ",", 
           RowBox[{"ImageSize", "->", "550"}]}], "]"}], ",", 
         RowBox[{"Plot", "[", 
          RowBox[{
           RowBox[{"{", 
            RowBox[{
             RowBox[{"PDF", "[", 
              RowBox[{"dnd11", ",", "x"}], "]"}], ",", 
             RowBox[{"PDF", "[", 
              RowBox[{"dnd12", ",", "x"}], "]"}]}], "}"}], ",", 
           RowBox[{"{", 
            RowBox[{"x", ",", 
             RowBox[{"Min", "[", 
              RowBox[{
               RowBox[{"Max", "[", 
                RowBox[{
                 RowBox[{
                  RowBox[{"Min", "[", 
                   RowBox[{
                    RowBox[{"Mean", "[", "dnd11", "]"}], ",", 
                    RowBox[{"Mean", "[", "dnd12", "]"}]}], "]"}], "-", 
                  RowBox[{"3", 
                   RowBox[{"Max", "[", 
                    RowBox[{
                    RowBox[{"StandardDeviation", "[", "dnd11", "]"}], ",", 
                    RowBox[{"StandardDeviation", "[", "dnd12", "]"}]}], 
                    "]"}]}]}], ",", "0"}], "]"}], ",", "mind1"}], "]"}], ",", 
             RowBox[{"Max", "[", 
              RowBox[{
               RowBox[{
                RowBox[{"Max", "[", 
                 RowBox[{
                  RowBox[{"Mean", "[", "dnd11", "]"}], ",", 
                  RowBox[{"Mean", "[", "dnd12", "]"}]}], "]"}], "+", 
                RowBox[{"3", 
                 RowBox[{"Max", "[", 
                  RowBox[{
                   RowBox[{"StandardDeviation", "[", "dnd11", "]"}], ",", 
                   RowBox[{"StandardDeviation", "[", "dnd12", "]"}]}], 
                  "]"}]}]}], ",", "mand1"}], "]"}]}], "}"}], ",", 
           RowBox[{"PlotRange", "->", "All"}], ",", " ", 
           RowBox[{"ImageSize", "->", "550"}], ",", 
           RowBox[{"Exclusions", "\[Rule]", "None"}], ",", 
           RowBox[{
           "PlotLabel", "->", "\"\<PDF of 1st measurand in nondiseased\>\""}],
            ",", 
           RowBox[{"PlotLegends", "->", 
            RowBox[{"Placed", "[", 
             RowBox[{
              RowBox[{"{", 
               RowBox[{
               "\"\<1st kernel PDF\>\"", ",", "\"\<2nd kernel PDF\>\""}], 
               "}"}], ",", "Below"}], "]"}]}], ",", 
           RowBox[{"PlotTheme", "->", "\"\<Scientific\>\""}], ",", 
           RowBox[{"Filling", "->", "Bottom"}]}], "]"}]}], "]"}], ",", "2", 
       ",", "\n", "\t", 
       RowBox[{"Show", "[", 
        RowBox[{
         RowBox[{"Histogram", "[", 
          RowBox[{"nd2", ",", "\"\<Knuth\>\"", ",", "\"\<PDF\>\"", ",", 
           RowBox[{"ImageSize", "->", "550"}]}], "]"}], ",", 
         RowBox[{"Plot", "[", 
          RowBox[{
           RowBox[{"{", 
            RowBox[{
             RowBox[{"PDF", "[", 
              RowBox[{"dnd21", ",", "x"}], "]"}], ",", 
             RowBox[{"PDF", "[", 
              RowBox[{"dnd22", ",", "x"}], "]"}]}], "}"}], ",", 
           RowBox[{"{", 
            RowBox[{"x", ",", 
             RowBox[{"Min", "[", 
              RowBox[{
               RowBox[{"Max", "[", 
                RowBox[{
                 RowBox[{
                  RowBox[{"Min", "[", 
                   RowBox[{
                    RowBox[{"Mean", "[", "dnd21", "]"}], ",", 
                    RowBox[{"Mean", "[", "dnd22", "]"}]}], "]"}], "-", 
                  RowBox[{"3", 
                   RowBox[{"Max", "[", 
                    RowBox[{
                    RowBox[{"StandardDeviation", "[", "dnd21", "]"}], ",", 
                    RowBox[{"StandardDeviation", "[", "dnd22", "]"}]}], 
                    "]"}]}]}], ",", "0"}], "]"}], ",", "mind2"}], "]"}], ",", 
             RowBox[{"Max", "[", 
              RowBox[{
               RowBox[{
                RowBox[{"Max", "[", 
                 RowBox[{
                  RowBox[{"Mean", "[", "dnd21", "]"}], ",", 
                  RowBox[{"Mean", "[", "dnd22", "]"}]}], "]"}], "+", 
                RowBox[{"3", 
                 RowBox[{"Max", "[", 
                  RowBox[{
                   RowBox[{"StandardDeviation", "[", "dnd21", "]"}], ",", 
                   RowBox[{"StandardDeviation", "[", "dnd22", "]"}]}], 
                  "]"}]}]}], ",", "mand2"}], "]"}]}], "}"}], ",", 
           RowBox[{"PlotRange", "->", "All"}], ",", " ", 
           RowBox[{"ImageSize", "->", "550"}], ",", 
           RowBox[{"Exclusions", "\[Rule]", "None"}], ",", 
           RowBox[{
           "PlotLabel", "->", "\"\<PDF of 2nd measurand in nondiseased\>\""}],
            ",", 
           RowBox[{"PlotLegends", "->", 
            RowBox[{"Placed", "[", 
             RowBox[{
              RowBox[{"{", 
               RowBox[{"\"\<1st kernel\>\"", ",", "\"\<2nd kernel\>\""}], 
               "}"}], ",", "Below"}], "]"}]}], ",", 
           RowBox[{"PlotTheme", "->", "\"\<Scientific\>\""}], ",", 
           RowBox[{"Filling", "->", "Bottom"}]}], "]"}]}], "]"}], ",", "3", 
       ",", "\[IndentingNewLine]", 
       RowBox[{"Show", "[", 
        RowBox[{
         RowBox[{"Histogram3D", "[", 
          RowBox[{"nd12", ",", "\"\<Knuth\>\"", ",", "\"\<PDF\>\"", ",", 
           RowBox[{"ImageSize", "->", "550"}]}], "]"}], ",", 
         RowBox[{"Plot3D", "[", 
          RowBox[{
           RowBox[{"{", 
            RowBox[{
             RowBox[{"PDF", "[", 
              RowBox[{"dnd121", ",", 
               RowBox[{"{", 
                RowBox[{"x", ",", "y"}], "}"}]}], "]"}], ",", 
             RowBox[{"PDF", "[", 
              RowBox[{"dnd122", ",", 
               RowBox[{"{", 
                RowBox[{"x", ",", "y"}], "}"}]}], "]"}]}], "}"}], ",", 
           RowBox[{"{", 
            RowBox[{"x", ",", 
             RowBox[{"Min", "[", 
              RowBox[{
               RowBox[{"Max", "[", 
                RowBox[{
                 RowBox[{
                  RowBox[{"Min", "[", 
                   RowBox[{
                    RowBox[{"Mean", "[", "dnd11", "]"}], ",", 
                    RowBox[{"Mean", "[", "dnd12", "]"}]}], "]"}], "-", 
                  RowBox[{"3", 
                   RowBox[{"Max", "[", 
                    RowBox[{
                    RowBox[{"StandardDeviation", "[", "dnd11", "]"}], ",", 
                    RowBox[{"StandardDeviation", "[", "dnd12", "]"}]}], 
                    "]"}]}]}], ",", "0"}], "]"}], ",", "mind1"}], "]"}], ",", 
             RowBox[{"Max", "[", 
              RowBox[{
               RowBox[{
                RowBox[{"Max", "[", 
                 RowBox[{
                  RowBox[{"Mean", "[", "dnd11", "]"}], ",", 
                  RowBox[{"Mean", "[", "dnd12", "]"}]}], "]"}], "+", 
                RowBox[{"3", 
                 RowBox[{"Max", "[", 
                  RowBox[{
                   RowBox[{"StandardDeviation", "[", "dnd11", "]"}], ",", 
                   RowBox[{"StandardDeviation", "[", "dnd12", "]"}]}], 
                  "]"}]}]}], ",", "mand1"}], "]"}]}], "}"}], ",", 
           RowBox[{"{", 
            RowBox[{"y", ",", 
             RowBox[{"Min", "[", 
              RowBox[{
               RowBox[{"Max", "[", 
                RowBox[{
                 RowBox[{
                  RowBox[{"Min", "[", 
                   RowBox[{
                    RowBox[{"Mean", "[", "dnd21", "]"}], ",", 
                    RowBox[{"Mean", "[", "dnd22", "]"}]}], "]"}], "-", 
                  RowBox[{"3", 
                   RowBox[{"Max", "[", 
                    RowBox[{
                    RowBox[{"StandardDeviation", "[", "dnd21", "]"}], ",", 
                    RowBox[{"StandardDeviation", "[", "dnd22", "]"}]}], 
                    "]"}]}]}], ",", "0"}], "]"}], ",", "mind2"}], "]"}], ",", 
             RowBox[{"Max", "[", 
              RowBox[{
               RowBox[{
                RowBox[{"Max", "[", 
                 RowBox[{
                  RowBox[{"Mean", "[", "dnd21", "]"}], ",", 
                  RowBox[{"Mean", "[", "dnd22", "]"}]}], "]"}], "+", 
                RowBox[{"3", 
                 RowBox[{"Max", "[", 
                  RowBox[{
                   RowBox[{"StandardDeviation", "[", "dnd21", "]"}], ",", 
                   RowBox[{"StandardDeviation", "[", "dnd22", "]"}]}], 
                  "]"}]}]}], ",", "mand2"}], "]"}]}], "}"}], ",", 
           RowBox[{"PlotRange", "->", "All"}], ",", 
           RowBox[{"PlotPoints", "->", "100"}], ",", 
           RowBox[{"ImageSize", "->", "550"}], ",", 
           RowBox[{"Exclusions", "->", "None"}], ",", 
           RowBox[{"AxesLabel", "->", 
            RowBox[{"{", 
             RowBox[{
             "\"\<1st measurand\>\"", ",", "\"\< 2nd measurand\>\"", ",", 
              "\"\<\>\""}], "}"}]}], ",", 
           RowBox[{
           "PlotLabel", "->", 
            "\"\<bivariate PDF of 1st & 2nd measurands in nondiseased\>\""}], 
           ",", 
           RowBox[{"PlotLegends", "->", 
            RowBox[{"Placed", "[", 
             RowBox[{
              RowBox[{"{", 
               RowBox[{
               "\"\<1st kernel PDF\>\"", ",", "\"\<2nd kernel PDF\>\""}], 
               "}"}], ",", "Below"}], "]"}]}], ",", 
           RowBox[{"PlotPoints", "->", "100"}], ",", 
           RowBox[{"PlotTheme", "->", "\"\<Scientific\>\""}]}], "]"}]}], 
        "]"}]}], "]"}]}], "]"}]}], ";"}], "\[IndentingNewLine]", 
 RowBox[{
  RowBox[{
   RowBox[{"cpdf3", "[", 
    RowBox[{
    "vd_", ",", "m11_", ",", "s11_", ",", "m12_", ",", "s12_", ",", "m21_", 
     ",", "s21_", ",", "m22_", ",", "s22_", ",", "cc1_", ",", "cc2_", ",", 
     "dist11_", ",", "dist12_", ",", "dist21_", ",", "dist22_", ",", "dd1_", 
     ",", "dd2_", ",", "dd12_", ",", "dnd1_", ",", "dnd2_", ",", "dnd12_", 
     ",", "msr_", ",", "pop_"}], "]"}], ":=", "\[IndentingNewLine]", 
   RowBox[{"Switch", "[", 
    RowBox[{
    "pop", ",", "\[IndentingNewLine]", "1", ",", "\[IndentingNewLine]", 
     RowBox[{"Switch", "[", 
      RowBox[{
      "msr", ",", "\[IndentingNewLine]", "1", ",", "\[IndentingNewLine]", 
       RowBox[{"Plot", "[", 
        RowBox[{
         RowBox[{"{", 
          RowBox[{
           RowBox[{"pdf", "[", 
            RowBox[{"x", ",", "m11", ",", "s11", ",", "dist11"}], "]"}], ",", 
           RowBox[{"PDF", "[", 
            RowBox[{"dd1", ",", "x"}], "]"}]}], "}"}], ",", 
         RowBox[{"{", 
          RowBox[{"x", ",", " ", 
           RowBox[{"Max", "[", 
            RowBox[{
             RowBox[{
              RowBox[{"Min", "[", 
               RowBox[{"m11", ",", 
                RowBox[{"Mean", "[", "dd1", "]"}]}], "]"}], "-", 
              RowBox[{"3", 
               RowBox[{"Max", "[", 
                RowBox[{"s11", ",", 
                 RowBox[{"StandardDeviation", "[", "dd1", "]"}]}], "]"}]}]}], 
             ",", "0"}], "]"}], ",", " ", 
           RowBox[{
            RowBox[{"Max", "[", 
             RowBox[{"m11", ",", 
              RowBox[{"Mean", "[", "dd1", "]"}]}], "]"}], "+", 
            RowBox[{"3", 
             RowBox[{"Max", "[", 
              RowBox[{"s11", ",", 
               RowBox[{"StandardDeviation", "[", "dd1", "]"}]}], "]"}]}]}]}], 
          "}"}], ",", 
         RowBox[{"PlotRange", "->", "All"}], ",", 
         RowBox[{"Exclusions", "\[Rule]", "None"}], ",", 
         RowBox[{"AxesLabel", "->", 
          RowBox[{"{", 
           RowBox[{"\"\<1st measurand\>\"", ",", "\"\<\>\""}], "}"}]}], ",", 
         RowBox[{
         "PlotLabel", "->", "\"\<PDF of 1st measurand in diseased\>\""}], ",", 
         RowBox[{"PlotLegends", "->", 
          RowBox[{"Placed", "[", 
           RowBox[{
            RowBox[{"{", 
             RowBox[{"\"\<parametric PDF\>\"", ",", "\"\<2nd set PDF\>\""}], 
             "}"}], ",", "Bottom"}], "]"}]}], ",", 
         RowBox[{"ImageSize", "->", "550"}], ",", 
         RowBox[{"PlotTheme", "->", "\"\<Scientific\>\""}], ",", 
         RowBox[{"Filling", "->", "Bottom"}]}], "]"}], ",", "2", ",", "\n", 
       "\t", 
       RowBox[{"Plot", "[", " ", 
        RowBox[{
         RowBox[{"{", 
          RowBox[{
           RowBox[{"pdf", "[", 
            RowBox[{"x", ",", "m21", ",", "s21", ",", "dist21"}], "]"}], ",", 
           RowBox[{"PDF", "[", 
            RowBox[{"dd2", ",", "x"}], "]"}]}], "}"}], ",", 
         RowBox[{"{", 
          RowBox[{"x", ",", " ", 
           RowBox[{"Max", "[", 
            RowBox[{
             RowBox[{
              RowBox[{"Min", "[", 
               RowBox[{"m21", ",", 
                RowBox[{"Mean", "[", "dd2", "]"}]}], "]"}], "-", 
              RowBox[{"3", 
               RowBox[{"Max", "[", 
                RowBox[{"s21", ",", 
                 RowBox[{"StandardDeviation", "[", "dd2", "]"}]}], "]"}]}]}], 
             ",", "0"}], "]"}], ",", " ", 
           RowBox[{
            RowBox[{"Max", "[", 
             RowBox[{"m21", ",", 
              RowBox[{"Mean", "[", "dd2", "]"}]}], "]"}], "+", 
            RowBox[{"3", 
             RowBox[{"Max", "[", 
              RowBox[{"s21", ",", 
               RowBox[{"StandardDeviation", "[", "dd2", "]"}]}], "]"}]}]}]}], 
          "}"}], ",", 
         RowBox[{"PlotRange", "->", "All"}], ",", 
         RowBox[{"AxesLabel", "->", 
          RowBox[{"{", 
           RowBox[{"\"\< 2nd measurand\>\"", ",", "\"\<\>\""}], "}"}]}], ",", 
         RowBox[{
         "PlotLabel", "->", "\"\<PDF of 2nd measurand in diseased\>\""}], ",", 
         RowBox[{"PlotLegends", "->", 
          RowBox[{"Placed", "[", 
           RowBox[{
            RowBox[{"{", 
             RowBox[{"\"\<parametric PDF\>\"", ",", "\"\<KDE PDF\>\""}], 
             "}"}], ",", "Bottom"}], "]"}]}], ",", 
         RowBox[{"ImageSize", "->", "550"}], ",", 
         RowBox[{"PlotTheme", "->", "\"\<Scientific\>\""}], ",", 
         RowBox[{"Filling", "->", "Bottom"}]}], "]"}], ",", "3", ",", 
       "\[IndentingNewLine]", 
       RowBox[{"Plot3D", "[", 
        RowBox[{
         RowBox[{"{", 
          RowBox[{
           RowBox[{"pdf", "[", 
            RowBox[{
            "x", ",", "y", ",", "m11", ",", "s11", ",", "m21", ",", "s21", 
             ",", "cc1", ",", "dist11", ",", "dist21"}], "]"}], ",", 
           RowBox[{"PDF", "[", 
            RowBox[{"dd12", ",", 
             RowBox[{"{", 
              RowBox[{"x", ",", "y"}], "}"}]}], "]"}]}], "}"}], ",", 
         RowBox[{"{", 
          RowBox[{"x", ",", " ", 
           RowBox[{"Max", "[", 
            RowBox[{
             RowBox[{
              RowBox[{"Min", "[", 
               RowBox[{"m11", ",", 
                RowBox[{"Mean", "[", "dd1", "]"}]}], "]"}], "-", 
              RowBox[{"3", 
               RowBox[{"Max", "[", 
                RowBox[{"s11", ",", 
                 RowBox[{"StandardDeviation", "[", "dd1", "]"}]}], "]"}]}]}], 
             ",", "0"}], "]"}], ",", " ", 
           RowBox[{
            RowBox[{"Max", "[", 
             RowBox[{"m11", ",", 
              RowBox[{"Mean", "[", "dd1", "]"}]}], "]"}], "+", 
            RowBox[{"Max", "[", 
             RowBox[{"s11", ",", 
              RowBox[{"StandardDeviation", "[", "dd1", "]"}]}], "]"}]}]}], 
          "}"}], ",", 
         RowBox[{"{", 
          RowBox[{"y", ",", " ", 
           RowBox[{"Max", "[", 
            RowBox[{
             RowBox[{
              RowBox[{"Min", "[", 
               RowBox[{"m21", ",", 
                RowBox[{"Mean", "[", "dd2", "]"}]}], "]"}], "-", 
              RowBox[{"3", 
               RowBox[{"Max", "[", 
                RowBox[{"s21", ",", 
                 RowBox[{"StandardDeviation", "[", "dd2", "]"}]}], "]"}]}]}], 
             ",", "0"}], "]"}], ",", " ", 
           RowBox[{
            RowBox[{"Max", "[", 
             RowBox[{"m21", ",", 
              RowBox[{"Mean", "[", "dd2", "]"}]}], "]"}], "+", 
            RowBox[{"Max", "[", 
             RowBox[{"s21", ",", 
              RowBox[{"StandardDeviation", "[", "dd2", "]"}]}], "]"}]}]}], 
          "}"}], ",", 
         RowBox[{"PlotRange", "->", "Full"}], ",", 
         RowBox[{"PlotPoints", "->", "100"}], ",", 
         RowBox[{"AxesLabel", "->", 
          RowBox[{"{", 
           RowBox[{
           "\"\<1st measurand\>\"", ",", "\"\< 2nd measurand\>\"", ",", 
            "\"\<\>\""}], "}"}]}], ",", 
         RowBox[{
         "PlotLabel", "->", 
          "\"\<bivariate PDF of 1st and 2nd measurands in diseased\>\""}], 
         ",", 
         RowBox[{"PlotLegends", "->", 
          RowBox[{"Placed", "[", 
           RowBox[{
            RowBox[{"{", 
             RowBox[{"\"\<parametric PDF\>\"", ",", "\"\<KDE PDF\>\""}], 
             "}"}], ",", "Bottom"}], "]"}]}], ",", 
         RowBox[{"ImageSize", "->", "550"}], ",", 
         RowBox[{"PlotTheme", "->", "\"\<Scientific\>\""}], ",", 
         RowBox[{"Filling", "->", "Bottom"}]}], "]"}]}], "]"}], ",", 
     "\[IndentingNewLine]", "2", ",", "\[IndentingNewLine]", 
     RowBox[{"Switch", "[", 
      RowBox[{
      "msr", ",", "\[IndentingNewLine]", "1", ",", "\[IndentingNewLine]", 
       RowBox[{"Plot", "[", 
        RowBox[{
         RowBox[{"{", 
          RowBox[{
           RowBox[{"pdf", "[", 
            RowBox[{"x", ",", "m12", ",", "s12", ",", "dist12"}], "]"}], ",", 
           RowBox[{"PDF", "[", 
            RowBox[{"dnd1", ",", "x"}], "]"}]}], "}"}], ",", 
         RowBox[{"{", 
          RowBox[{"x", ",", " ", 
           RowBox[{"Max", "[", 
            RowBox[{
             RowBox[{
              RowBox[{"Min", "[", 
               RowBox[{"m12", ",", 
                RowBox[{"Mean", "[", "dnd1", "]"}]}], "]"}], "-", 
              RowBox[{"3", 
               RowBox[{"Max", "[", 
                RowBox[{"s12", ",", 
                 RowBox[{"StandardDeviation", "[", "dnd1", "]"}]}], "]"}]}]}],
              ",", "0"}], "]"}], ",", " ", 
           RowBox[{
            RowBox[{"Max", "[", 
             RowBox[{"m12", ",", 
              RowBox[{"Mean", "[", "dnd1", "]"}]}], "]"}], "+", 
            RowBox[{"3", 
             RowBox[{"Max", "[", 
              RowBox[{"s12", ",", 
               RowBox[{"StandardDeviation", "[", "dnd1", "]"}]}], "]"}]}]}]}],
           "}"}], ",", 
         RowBox[{"PlotRange", "->", "All"}], ",", 
         RowBox[{"Exclusions", "\[Rule]", "None"}], ",", 
         RowBox[{"AxesLabel", "->", 
          RowBox[{"{", 
           RowBox[{"\"\<1st measurand\>\"", ",", "\"\<\>\""}], "}"}]}], ",", 
         RowBox[{
         "PlotLabel", "->", "\"\<PDF of 1st measurand in nondiseased\>\""}], 
         ",", 
         RowBox[{"PlotLegends", "->", 
          RowBox[{"Placed", "[", 
           RowBox[{
            RowBox[{"{", 
             RowBox[{"\"\<parametric PDF\>\"", ",", "\"\<KDE PDF\>\""}], 
             "}"}], ",", "Bottom"}], "]"}]}], ",", 
         RowBox[{"ImageSize", "->", "550"}], ",", 
         RowBox[{"PlotTheme", "->", "\"\<Scientific\>\""}], ",", 
         RowBox[{"Filling", "->", "Bottom"}]}], "]"}], ",", 
       "\[IndentingNewLine]", "2", ",", "\n", "\t", 
       RowBox[{"Plot", "[", 
        RowBox[{
         RowBox[{"{", 
          RowBox[{
           RowBox[{"pdf", "[", 
            RowBox[{"x", ",", "m22", ",", "s22", ",", "dist22"}], "]"}], ",", 
           RowBox[{"PDF", "[", 
            RowBox[{"dnd2", ",", "x"}], "]"}]}], "}"}], ",", 
         RowBox[{"{", 
          RowBox[{"x", ",", " ", 
           RowBox[{"Max", "[", 
            RowBox[{
             RowBox[{
              RowBox[{"Min", "[", 
               RowBox[{"m22", ",", 
                RowBox[{"Mean", "[", "dnd2", "]"}]}], "]"}], "-", 
              RowBox[{"3", 
               RowBox[{"Max", "[", 
                RowBox[{"s22", ",", 
                 RowBox[{"StandardDeviation", "[", "dnd2", "]"}]}], "]"}]}]}],
              ",", "0"}], "]"}], ",", " ", 
           RowBox[{
            RowBox[{"Max", "[", 
             RowBox[{"m22", ",", 
              RowBox[{"Mean", "[", "dnd2", "]"}]}], "]"}], "+", 
            RowBox[{"3", 
             RowBox[{"Max", "[", 
              RowBox[{"s22", ",", 
               RowBox[{"StandardDeviation", "[", "dnd2", "]"}]}], "]"}]}]}]}],
           "}"}], ",", 
         RowBox[{"PlotRange", "->", "All"}], ",", 
         RowBox[{"Exclusions", "\[Rule]", "None"}], ",", 
         RowBox[{"AxesLabel", "->", 
          RowBox[{"{", 
           RowBox[{"\"\< 2nd measurand\>\"", ",", "\"\<\>\""}], "}"}]}], ",", 
         RowBox[{
         "PlotLabel", "->", "\"\<PDF of 2nd measurand in nondiseased\>\""}], 
         ",", 
         RowBox[{"PlotLegends", "->", 
          RowBox[{"Placed", "[", 
           RowBox[{
            RowBox[{"{", 
             RowBox[{"\"\<parametric PDF\>\"", ",", "\"\<KDE PDF\>\""}], 
             "}"}], ",", "Bottom"}], "]"}]}], ",", 
         RowBox[{"ImageSize", "->", "550"}], ",", 
         RowBox[{"PlotTheme", "->", "\"\<Scientific\>\""}], ",", 
         RowBox[{"Filling", "->", "Bottom"}]}], "]"}], ",", 
       "\[IndentingNewLine]", "3", ",", "\[IndentingNewLine]", 
       RowBox[{"Plot3D", "[", 
        RowBox[{
         RowBox[{"{", 
          RowBox[{
           RowBox[{"pdf", "[", 
            RowBox[{
            "x", ",", "y", ",", "m12", ",", "s12", ",", "m22", ",", "s22", 
             ",", "cc2", ",", "dist12", ",", "dist22"}], "]"}], ",", 
           RowBox[{"PDF", "[", 
            RowBox[{"dnd12", ",", 
             RowBox[{"{", 
              RowBox[{"x", ",", "y"}], "}"}]}], "]"}]}], "}"}], ",", 
         RowBox[{"{", 
          RowBox[{"x", ",", " ", 
           RowBox[{"Max", "[", 
            RowBox[{
             RowBox[{
              RowBox[{"Min", "[", 
               RowBox[{"m12", ",", 
                RowBox[{"Mean", "[", "dnd1", "]"}]}], "]"}], "-", 
              RowBox[{"3", 
               RowBox[{"Max", "[", 
                RowBox[{"s12", ",", 
                 RowBox[{"StandardDeviation", "[", "dnd1", "]"}]}], "]"}]}]}],
              ",", "0"}], "]"}], ",", " ", 
           RowBox[{
            RowBox[{"Max", "[", 
             RowBox[{"m12", ",", 
              RowBox[{"Mean", "[", "dnd1", "]"}]}], "]"}], "+", 
            RowBox[{"3", 
             RowBox[{"Max", "[", 
              RowBox[{"s12", ",", 
               RowBox[{"StandardDeviation", "[", "dnd1", "]"}]}], "]"}]}]}]}],
           "}"}], ",", 
         RowBox[{"{", 
          RowBox[{"y", ",", " ", 
           RowBox[{"Max", "[", 
            RowBox[{
             RowBox[{
              RowBox[{"Min", "[", 
               RowBox[{"m22", ",", 
                RowBox[{"Mean", "[", "dnd2", "]"}]}], "]"}], "-", 
              RowBox[{"3", 
               RowBox[{"Max", "[", 
                RowBox[{"s22", ",", 
                 RowBox[{"StandardDeviation", "[", "dnd2", "]"}]}], "]"}]}]}],
              ",", "0"}], "]"}], ",", " ", 
           RowBox[{
            RowBox[{"Max", "[", 
             RowBox[{"m22", ",", 
              RowBox[{"Mean", "[", "dnd2", "]"}]}], "]"}], "+", 
            RowBox[{"3", 
             RowBox[{"Max", "[", 
              RowBox[{"s22", ",", 
               RowBox[{"StandardDeviation", "[", "dnd2", "]"}]}], "]"}]}]}]}],
           "}"}], ",", 
         RowBox[{"PlotRange", "->", "Full"}], ",", 
         RowBox[{"AxesLabel", "->", 
          RowBox[{"{", 
           RowBox[{
           "\"\<1st measurand\>\"", ",", "\"\< 2nd measurand\>\"", ",", 
            "\"\<\>\""}], "}"}]}], ",", 
         RowBox[{
         "PlotLabel", "->", 
          "\"\<bivariate PDF of 1st and 2nd measurands in nondiseased\>\""}], 
         ",", 
         RowBox[{"PlotLegends", "->", 
          RowBox[{"Placed", "[", 
           RowBox[{
            RowBox[{"{", 
             RowBox[{"\"\<parametric PDF\>\"", ",", "\"\<KDE PDF\>\""}], 
             "}"}], ",", "Bottom"}], "]"}]}], ",", 
         RowBox[{"ImageSize", "->", "550"}], ",", 
         RowBox[{"PlotTheme", "->", "\"\<Scientific\>\""}]}], "]"}]}], "]"}], 
     ",", "\[IndentingNewLine]", "3", ",", "\[IndentingNewLine]", 
     RowBox[{"Switch", "[", 
      RowBox[{
      "msr", ",", "\[IndentingNewLine]", "1", ",", "\[IndentingNewLine]", 
       RowBox[{"Plot", "[", 
        RowBox[{
         RowBox[{"{", 
          RowBox[{
           RowBox[{"vd", " ", 
            RowBox[{"pdf", "[", 
             RowBox[{"x", ",", "m11", ",", "s11", ",", "dist11"}], "]"}]}], 
           ",", " ", 
           RowBox[{"vd", " ", 
            RowBox[{"PDF", "[", 
             RowBox[{"dd1", ",", "x"}], "]"}]}], ",", 
           RowBox[{
            RowBox[{"(", 
             RowBox[{"1", "-", "vd"}], ")"}], 
            RowBox[{"pdf", "[", 
             RowBox[{"x", ",", "m12", ",", "s12", ",", "dist12"}], "]"}]}], 
           ",", 
           RowBox[{
            RowBox[{"(", 
             RowBox[{"1", "-", "vd"}], ")"}], 
            RowBox[{"PDF", "[", 
             RowBox[{"dnd1", ",", "x"}], "]"}]}]}], "}"}], ",", 
         RowBox[{"{", 
          RowBox[{"x", ",", 
           RowBox[{"Max", "[", 
            RowBox[{
             RowBox[{
              RowBox[{"Min", "[", 
               RowBox[{"m11", ",", "m12", ",", 
                RowBox[{"Mean", "[", "dd1", "]"}], ",", 
                RowBox[{"Mean", "[", "dnd1", "]"}]}], "]"}], "-", 
              RowBox[{"3", 
               RowBox[{"Max", "[", 
                RowBox[{"s11", ",", "s12", ",", 
                 RowBox[{"StandardDeviation", "[", "dd1", "]"}], ",", 
                 RowBox[{"StandardDeviation", "[", "dnd1", "]"}]}], "]"}]}]}],
              ",", "0"}], "]"}], ",", 
           RowBox[{
            RowBox[{"Max", "[", 
             RowBox[{"m11", ",", "m12", ",", 
              RowBox[{"Mean", "[", "dd1", "]"}], ",", 
              RowBox[{"Mean", "[", "dnd1", "]"}]}], "]"}], "+", 
            RowBox[{"3", 
             RowBox[{"Max", "[", 
              RowBox[{"s11", ",", "s12", ",", 
               RowBox[{"StandardDeviation", "[", "dd1", "]"}], ",", 
               RowBox[{"StandardDeviation", "[", "dnd1", "]"}]}], "]"}]}]}]}],
           "}"}], ",", 
         RowBox[{"PlotRange", "->", "All"}], ",", 
         RowBox[{"Exclusions", "\[Rule]", "None"}], ",", 
         RowBox[{"AxesLabel", "->", 
          RowBox[{"{", 
           RowBox[{"\"\<1st measurand\>\"", ",", "\"\<\>\""}], "}"}]}], ",", 
         RowBox[{"PlotLabel", "->", "\"\<PDF of 1st measurand\>\""}], ",", 
         RowBox[{"PlotLegends", "->", 
          RowBox[{"Placed", "[", 
           RowBox[{
            RowBox[{"{", 
             RowBox[{
             "\"\<parametric PDF, diseased\>\"", ",", 
              "\"\<KDE PDF, diseased\>\"", ",", 
              "\"\<parametric PDF, nondiseased\>\"", ",", 
              "\"\<KDE PDF, nondiseased\>\""}], "}"}], ",", "Bottom"}], 
           "]"}]}], ",", 
         RowBox[{"ImageSize", "->", "550"}], ",", 
         RowBox[{"PlotTheme", "->", "\"\<Scientific\>\""}], ",", 
         RowBox[{"Filling", "->", "Bottom"}]}], "]"}], ",", 
       "\[IndentingNewLine]", "2", ",", "\n", "\t", 
       RowBox[{"Plot", "[", 
        RowBox[{
         RowBox[{"{", 
          RowBox[{
           RowBox[{"vd", " ", 
            RowBox[{"pdf", "[", 
             RowBox[{"x", ",", "m21", ",", "s21", ",", "dist21"}], "]"}]}], 
           ",", 
           RowBox[{"vd", " ", 
            RowBox[{"PDF", "[", 
             RowBox[{"dd2", ",", "x"}], "]"}]}], ",", 
           RowBox[{
            RowBox[{"(", 
             RowBox[{"1", "-", "vd"}], ")"}], 
            RowBox[{"pdf", "[", 
             RowBox[{"x", ",", "m22", ",", "s22", ",", "dist22"}], "]"}]}], 
           ",", 
           RowBox[{
            RowBox[{"(", 
             RowBox[{"1", "-", "vd"}], ")"}], 
            RowBox[{"PDF", "[", 
             RowBox[{"dnd2", ",", "x"}], "]"}]}]}], "}"}], ",", 
         RowBox[{"{", 
          RowBox[{"x", ",", 
           RowBox[{"Max", "[", 
            RowBox[{
             RowBox[{
              RowBox[{"Min", "[", 
               RowBox[{"m21", ",", "m22", ",", 
                RowBox[{"Mean", "[", "dd1", "]"}], ",", 
                RowBox[{"Mean", "[", "dnd2", "]"}]}], "]"}], "-", 
              RowBox[{"3", 
               RowBox[{"Max", "[", 
                RowBox[{"s21", ",", "s22", ",", 
                 RowBox[{"StandardDeviation", "[", "dd2", "]"}], ",", 
                 RowBox[{"StandardDeviation", "[", "dnd2", "]"}]}], "]"}]}]}],
              ",", "0"}], "]"}], ",", 
           RowBox[{
            RowBox[{"Max", "[", 
             RowBox[{"m21", ",", "m22", ",", 
              RowBox[{"Mean", "[", "dd2", "]"}], ",", 
              RowBox[{"Mean", "[", "dnd2", "]"}]}], "]"}], "+", 
            RowBox[{"3", 
             RowBox[{"Max", "[", 
              RowBox[{"s21", ",", "s22", ",", 
               RowBox[{"StandardDeviation", "[", "dd2", "]"}], ",", 
               RowBox[{"StandardDeviation", "[", "dnd2", "]"}]}], "]"}]}]}]}],
           "}"}], ",", 
         RowBox[{"PlotRange", "->", "All"}], ",", 
         RowBox[{"Exclusions", "\[Rule]", "None"}], ",", 
         RowBox[{"AxesLabel", "->", 
          RowBox[{"{", 
           RowBox[{"\"\< 2nd measurand\>\"", ",", "\"\<\>\""}], "}"}]}], ",", 
         RowBox[{"PlotLabel", "->", "\"\<PDF of 2nd measurand\>\""}], ",", 
         RowBox[{"PlotLegends", "->", 
          RowBox[{"Placed", "[", 
           RowBox[{
            RowBox[{"{", 
             RowBox[{
             "\"\<parametric PDF, diseased\>\"", ",", 
              "\"\<KDE PDF, diseased\>\"", ",", 
              "\"\<parametric PDF, nondiseased\>\"", ",", 
              "\"\<KDE PDF, nondiseased\>\""}], "}"}], ",", "Bottom"}], 
           "]"}]}], ",", 
         RowBox[{"ImageSize", "->", "550"}], ",", 
         RowBox[{"PlotTheme", "->", "\"\<Scientific\>\""}], ",", 
         RowBox[{"Filling", "->", "Bottom"}]}], "]"}], ",", 
       "\[IndentingNewLine]", "3", ",", "\[IndentingNewLine]", 
       RowBox[{"Plot3D", "[", 
        RowBox[{
         RowBox[{"{", 
          RowBox[{
           RowBox[{"vd", " ", 
            RowBox[{"pdf", "[", 
             RowBox[{
             "x", ",", "y", ",", "m11", ",", "s11", ",", "m21", ",", "s21", 
              ",", "cc1", ",", "dist11", ",", "dist21"}], "]"}]}], ",", 
           RowBox[{"vd", " ", 
            RowBox[{"PDF", "[", 
             RowBox[{"dd12", ",", 
              RowBox[{"{", 
               RowBox[{"x", ",", "y"}], "}"}]}], "]"}]}], ",", 
           RowBox[{
            RowBox[{"(", 
             RowBox[{"1", "-", "vd"}], ")"}], 
            RowBox[{"pdf", "[", 
             RowBox[{
             "x", ",", "y", ",", "m12", ",", "s12", ",", "m22", ",", "s22", 
              ",", "cc2", ",", "dist12", ",", "dist22"}], "]"}]}], ",", 
           RowBox[{
            RowBox[{"(", 
             RowBox[{"1", "-", "vd"}], ")"}], 
            RowBox[{"PDF", "[", 
             RowBox[{"dnd12", ",", 
              RowBox[{"{", 
               RowBox[{"x", ",", "y"}], "}"}]}], "]"}]}]}], "}"}], ",", 
         RowBox[{"{", 
          RowBox[{"x", ",", 
           RowBox[{"Max", "[", 
            RowBox[{
             RowBox[{
              RowBox[{"Min", "[", 
               RowBox[{"m11", ",", "m12", ",", 
                RowBox[{"Mean", "[", "dd1", "]"}], ",", 
                RowBox[{"Mean", "[", "dnd1", "]"}]}], "]"}], "-", 
              RowBox[{"3", 
               RowBox[{"Max", "[", 
                RowBox[{"s11", ",", "s12", ",", 
                 RowBox[{"StandardDeviation", "[", "dd1", "]"}], ",", 
                 RowBox[{"StandardDeviation", "[", "dnd1", "]"}]}], "]"}]}]}],
              ",", "0"}], "]"}], ",", 
           RowBox[{
            RowBox[{"Max", "[", 
             RowBox[{"m11", ",", "m12", ",", 
              RowBox[{"Mean", "[", "dd1", "]"}], ",", 
              RowBox[{"Mean", "[", "dnd1", "]"}]}], "]"}], "+", 
            RowBox[{"3", 
             RowBox[{"Max", "[", 
              RowBox[{"s11", ",", "s12", ",", 
               RowBox[{"StandardDeviation", "[", "dd1", "]"}], ",", 
               RowBox[{"StandardDeviation", "[", "dnd1", "]"}]}], "]"}]}]}]}],
           "}"}], ",", 
         RowBox[{"{", 
          RowBox[{"y", ",", 
           RowBox[{"Max", "[", 
            RowBox[{
             RowBox[{
              RowBox[{"Min", "[", 
               RowBox[{"m21", ",", "m22", ",", 
                RowBox[{"Mean", "[", "dd1", "]"}], ",", 
                RowBox[{"Mean", "[", "dnd2", "]"}]}], "]"}], "-", 
              RowBox[{"3", 
               RowBox[{"Max", "[", 
                RowBox[{"s21", ",", "s22", ",", 
                 RowBox[{"StandardDeviation", "[", "dd2", "]"}], ",", 
                 RowBox[{"StandardDeviation", "[", "dnd2", "]"}]}], "]"}]}]}],
              ",", "0"}], "]"}], ",", 
           RowBox[{
            RowBox[{"Max", "[", 
             RowBox[{"m21", ",", "m22", ",", 
              RowBox[{"Mean", "[", "dd2", "]"}], ",", 
              RowBox[{"Mean", "[", "dnd2", "]"}]}], "]"}], "+", 
            RowBox[{"3", 
             RowBox[{"Max", "[", 
              RowBox[{"s21", ",", "s22", ",", 
               RowBox[{"StandardDeviation", "[", "dd2", "]"}], ",", 
               RowBox[{"StandardDeviation", "[", "dnd2", "]"}]}], "]"}]}]}]}],
           "}"}], ",", 
         RowBox[{"PlotRange", "->", "Full"}], ",", 
         RowBox[{"Exclusions", "\[Rule]", "None"}], ",", 
         RowBox[{"AxesLabel", "->", 
          RowBox[{"{", 
           RowBox[{
           "\"\<1st measurand\>\"", ",", "\"\< 2nd measurand\>\"", ",", 
            "\"\<\>\""}], "}"}]}], ",", 
         RowBox[{
         "PlotLabel", "->", 
          "\"\<bivariate PDF of 1st and 2nd measurands\>\""}], ",", 
         RowBox[{"PlotLegends", "->", 
          RowBox[{"Placed", "[", 
           RowBox[{
            RowBox[{"{", 
             RowBox[{
             "\"\<parametric PDF, diseased\>\"", ",", 
              "\"\<KDE PDF, diseased\>\"", ",", 
              "\"\<parametric PDF, nondiseased\>\"", ",", 
              "\"\<KDE PDF, nondiseased\>\""}], "}"}], ",", "Bottom"}], 
           "]"}]}], ",", 
         RowBox[{"ImageSize", "->", "550"}], ",", 
         RowBox[{"PlotTheme", "->", "\"\<Scientific\>\""}]}], "]"}]}], 
      "]"}]}], "]"}]}], ";"}], "\[IndentingNewLine]", 
 RowBox[{
  RowBox[{
   RowBox[{"hcpdf3", "[", 
    RowBox[{
    "vd_", ",", "m11_", ",", "s11_", ",", "m12_", ",", "s12_", ",", "m21_", 
     ",", "s21_", ",", "m22_", ",", "s22_", ",", "cc1_", ",", "cc2_", ",", 
     "dist11_", ",", "dist12_", ",", "dist21_", ",", "dist22_", ",", "dd1_", 
     ",", "dd2_", ",", "dd12_", ",", "dnd1_", ",", "dnd2_", ",", "dnd12_", 
     ",", "msr_", ",", "pop_"}], "]"}], ":=", "\[IndentingNewLine]", 
   RowBox[{"Quiet", "[", 
    RowBox[{"Switch", "[", 
     RowBox[{
     "pop", ",", "\[IndentingNewLine]", "1", ",", "\[IndentingNewLine]", 
      RowBox[{"Switch", "[", 
       RowBox[{
       "msr", ",", "\[IndentingNewLine]", "1", ",", "\[IndentingNewLine]", 
        RowBox[{"Show", "[", 
         RowBox[{
          RowBox[{"Histogram", "[", 
           RowBox[{"d1", ",", "\"\<Knuth\>\"", ",", "\"\<PDF\>\"", ",", 
            RowBox[{"ImageSize", "->", "550"}]}], "]"}], ",", 
          RowBox[{"Plot", "[", 
           RowBox[{
            RowBox[{"{", 
             RowBox[{
              RowBox[{"pdf", "[", 
               RowBox[{"x", ",", "m11", ",", "s11", ",", "dist11"}], "]"}], 
              ",", 
              RowBox[{"PDF", "[", 
               RowBox[{"dd1", ",", "x"}], "]"}]}], "}"}], ",", 
            RowBox[{"{", 
             RowBox[{"x", ",", 
              RowBox[{"Min", "[", " ", 
               RowBox[{
                RowBox[{"Max", "[", 
                 RowBox[{
                  RowBox[{
                   RowBox[{"Min", "[", 
                    RowBox[{"m11", ",", 
                    RowBox[{"Mean", "[", "dd1", "]"}]}], "]"}], "-", 
                   RowBox[{"3", 
                    RowBox[{"Max", "[", 
                    RowBox[{"s11", ",", 
                    RowBox[{"StandardDeviation", "[", "dd1", "]"}]}], 
                    "]"}]}]}], ",", "0"}], "]"}], ",", "mid1"}], "]"}], ",", 
              RowBox[{"Max", "[", " ", 
               RowBox[{
                RowBox[{
                 RowBox[{"Max", "[", 
                  RowBox[{"m11", ",", 
                   RowBox[{"Mean", "[", "dd1", "]"}]}], "]"}], "+", 
                 RowBox[{"3", 
                  RowBox[{"Max", "[", 
                   RowBox[{"s11", ",", 
                    RowBox[{"StandardDeviation", "[", "dd1", "]"}]}], 
                   "]"}]}]}], ",", "mad1"}], "]"}]}], "}"}], ",", 
            RowBox[{"PlotRange", "->", "All"}], ",", 
            RowBox[{"Exclusions", "\[Rule]", "None"}], ",", 
            RowBox[{"AxesLabel", "->", 
             RowBox[{"{", 
              RowBox[{"\"\<1st measurand\>\"", ",", "\"\<\>\""}], "}"}]}], 
            ",", 
            RowBox[{
            "PlotLabel", "->", "\"\<PDF of 1st measurand in diseased\>\""}], 
            ",", 
            RowBox[{"PlotLegends", "->", 
             RowBox[{"Placed", "[", 
              RowBox[{
               RowBox[{"{", 
                RowBox[{"\"\<parametric PDF\>\"", ",", "\"\<KDE PDF\>\""}], 
                "}"}], ",", "Bottom"}], "]"}]}], ",", 
            RowBox[{"ImageSize", "->", "550"}], ",", 
            RowBox[{"PlotTheme", "->", "\"\<Scientific\>\""}], ",", 
            RowBox[{"Filling", "->", "Bottom"}]}], "]"}]}], "]"}], ",", 
        "\[IndentingNewLine]", "2", ",", "\[IndentingNewLine]", 
        RowBox[{"Show", "[", 
         RowBox[{
          RowBox[{"Histogram", "[", 
           RowBox[{"d2", ",", "\"\<Knuth\>\"", ",", "\"\<PDF\>\"", ",", 
            RowBox[{"ImageSize", "->", "550"}]}], "]"}], ",", 
          RowBox[{"Plot", "[", " ", 
           RowBox[{
            RowBox[{"{", 
             RowBox[{
              RowBox[{"pdf", "[", 
               RowBox[{"x", ",", "m21", ",", "s21", ",", "dist21"}], "]"}], 
              ",", 
              RowBox[{"PDF", "[", 
               RowBox[{"dd2", ",", "x"}], "]"}]}], "}"}], ",", 
            RowBox[{"{", 
             RowBox[{"x", ",", " ", 
              RowBox[{"Min", "[", 
               RowBox[{
                RowBox[{"Max", "[", 
                 RowBox[{
                  RowBox[{
                   RowBox[{"Min", "[", 
                    RowBox[{"m21", ",", 
                    RowBox[{"Mean", "[", "dd2", "]"}]}], "]"}], "-", 
                   RowBox[{"3", 
                    RowBox[{"Max", "[", 
                    RowBox[{"s21", ",", 
                    RowBox[{"StandardDeviation", "[", "dd2", "]"}]}], 
                    "]"}]}]}], ",", "0"}], "]"}], ",", "mid2"}], "]"}], ",", 
              " ", 
              RowBox[{"Max", "[", 
               RowBox[{
                RowBox[{
                 RowBox[{"Max", "[", 
                  RowBox[{"m21", ",", 
                   RowBox[{"Mean", "[", "dd2", "]"}]}], "]"}], "+", 
                 RowBox[{"3", 
                  RowBox[{"Max", "[", 
                   RowBox[{"s21", ",", 
                    RowBox[{"StandardDeviation", "[", "dd2", "]"}]}], 
                   "]"}]}]}], ",", "mad2"}], "]"}]}], "}"}], ",", 
            RowBox[{"PlotRange", "->", "All"}], ",", 
            RowBox[{"AxesLabel", "->", 
             RowBox[{"{", 
              RowBox[{"\"\< 2nd measurand\>\"", ",", "\"\<\>\""}], "}"}]}], 
            ",", 
            RowBox[{
            "PlotLabel", "->", "\"\<PDF of 2nd measurand in diseased\>\""}], 
            ",", 
            RowBox[{"PlotLegends", "->", 
             RowBox[{"Placed", "[", 
              RowBox[{
               RowBox[{"{", 
                RowBox[{"\"\<parametric PDF\>\"", ",", "\"\<KDE PDF\>\""}], 
                "}"}], ",", "Bottom"}], "]"}]}], ",", 
            RowBox[{"ImageSize", "->", "550"}], ",", 
            RowBox[{"PlotTheme", "->", "\"\<Scientific\>\""}], ",", 
            RowBox[{"Filling", "->", "Bottom"}]}], "]"}]}], "]"}], ",", 
        "\[IndentingNewLine]", "3", ",", "\[IndentingNewLine]", 
        RowBox[{"Show", "[", 
         RowBox[{
          RowBox[{"Histogram3D", "[", 
           RowBox[{"d12", ",", "\"\<Knuth\>\"", ",", "\"\<PDF\>\"", ",", 
            RowBox[{"ImageSize", "->", "550"}]}], "]"}], ",", 
          RowBox[{"Plot3D", "[", 
           RowBox[{
            RowBox[{"{", 
             RowBox[{
              RowBox[{"pdf", "[", 
               RowBox[{
               "x", ",", "y", ",", "m11", ",", "s11", ",", "m21", ",", "s21", 
                ",", "cc1", ",", "dist11", ",", "dist21"}], "]"}], ",", 
              RowBox[{"PDF", "[", 
               RowBox[{"dd12", ",", 
                RowBox[{"{", 
                 RowBox[{"x", ",", "y"}], "}"}]}], "]"}]}], "}"}], ",", 
            RowBox[{"{", 
             RowBox[{"x", ",", 
              RowBox[{"Min", "[", " ", 
               RowBox[{
                RowBox[{"Max", "[", 
                 RowBox[{
                  RowBox[{
                   RowBox[{"Min", "[", 
                    RowBox[{"m11", ",", 
                    RowBox[{"Mean", "[", "dd1", "]"}]}], "]"}], "-", 
                   RowBox[{"3", 
                    RowBox[{"Max", "[", 
                    RowBox[{"s11", ",", 
                    RowBox[{"StandardDeviation", "[", "dd1", "]"}]}], 
                    "]"}]}]}], ",", "0"}], "]"}], ",", "mid1"}], "]"}], ",", 
              RowBox[{"Max", "[", " ", 
               RowBox[{
                RowBox[{
                 RowBox[{"Max", "[", 
                  RowBox[{"m11", ",", 
                   RowBox[{"Mean", "[", "dd1", "]"}]}], "]"}], "+", 
                 RowBox[{"3", 
                  RowBox[{"Max", "[", 
                   RowBox[{"s11", ",", 
                    RowBox[{"StandardDeviation", "[", "dd1", "]"}]}], 
                   "]"}]}]}], ",", "mad1"}], "]"}]}], "}"}], ",", 
            RowBox[{"{", 
             RowBox[{"y", ",", " ", 
              RowBox[{"Min", "[", 
               RowBox[{
                RowBox[{"Max", "[", 
                 RowBox[{
                  RowBox[{
                   RowBox[{"Min", "[", 
                    RowBox[{"m21", ",", 
                    RowBox[{"Mean", "[", "dd2", "]"}]}], "]"}], "-", 
                   RowBox[{"3", 
                    RowBox[{"Max", "[", 
                    RowBox[{"s21", ",", 
                    RowBox[{"StandardDeviation", "[", "dd2", "]"}]}], 
                    "]"}]}]}], ",", "0"}], "]"}], ",", "mid2"}], "]"}], ",", 
              " ", 
              RowBox[{"Max", "[", 
               RowBox[{
                RowBox[{
                 RowBox[{"Max", "[", 
                  RowBox[{"m21", ",", 
                   RowBox[{"Mean", "[", "dd2", "]"}]}], "]"}], "+", 
                 RowBox[{"3", 
                  RowBox[{"Max", "[", 
                   RowBox[{"s21", ",", 
                    RowBox[{"StandardDeviation", "[", "dd2", "]"}]}], 
                   "]"}]}]}], ",", "mad2"}], "]"}]}], "}"}], ",", 
            RowBox[{"PlotRange", "->", "Full"}], ",", 
            RowBox[{"PlotPoints", "->", "100"}], ",", 
            RowBox[{"AxesLabel", "->", 
             RowBox[{"{", 
              RowBox[{
              "\"\<1st measurand\>\"", ",", "\"\< 2nd measurand\>\"", ",", 
               "\"\<\>\""}], "}"}]}], ",", 
            RowBox[{
            "PlotLabel", "->", 
             "\"\<bivariate PDF of 1st and 2nd measurands in diseased\>\""}], 
            ",", 
            RowBox[{"PlotLegends", "->", 
             RowBox[{"Placed", "[", 
              RowBox[{
               RowBox[{"{", 
                RowBox[{"\"\<parametric PDF\>\"", ",", "\"\<KDE PDF\>\""}], 
                "}"}], ",", "Bottom"}], "]"}]}], ",", 
            RowBox[{"ImageSize", "->", "550"}], ",", 
            RowBox[{"PlotTheme", "->", "\"\<Scientific\>\""}], ",", 
            RowBox[{"Filling", "->", "Bottom"}]}], "]"}]}], "]"}]}], "]"}], 
      ",", "\[IndentingNewLine]", "2", ",", "\[IndentingNewLine]", 
      RowBox[{"Switch", "[", 
       RowBox[{
       "msr", ",", "\[IndentingNewLine]", "1", ",", "\[IndentingNewLine]", 
        RowBox[{"Show", "[", 
         RowBox[{
          RowBox[{"Histogram", "[", 
           RowBox[{"nd1", ",", "\"\<Knuth\>\"", ",", "\"\<PDF\>\"", ",", 
            RowBox[{"ImageSize", "->", "550"}]}], "]"}], ",", 
          RowBox[{"Plot", "[", 
           RowBox[{
            RowBox[{"{", 
             RowBox[{
              RowBox[{"pdf", "[", 
               RowBox[{"x", ",", "m12", ",", "s12", ",", "dist12"}], "]"}], 
              ",", 
              RowBox[{"PDF", "[", 
               RowBox[{"dnd1", ",", "x"}], "]"}]}], "}"}], ",", 
            RowBox[{"{", 
             RowBox[{"x", ",", 
              RowBox[{"Min", "[", " ", 
               RowBox[{
                RowBox[{"Max", "[", 
                 RowBox[{
                  RowBox[{
                   RowBox[{"Min", "[", 
                    RowBox[{"m12", ",", 
                    RowBox[{"Mean", "[", "dnd1", "]"}]}], "]"}], "-", 
                   RowBox[{"3", 
                    RowBox[{"Max", "[", 
                    RowBox[{"s12", ",", 
                    RowBox[{"StandardDeviation", "[", "dnd1", "]"}]}], 
                    "]"}]}]}], ",", "0"}], "]"}], ",", "mind1"}], "]"}], ",", 
              RowBox[{"Max", "[", " ", 
               RowBox[{
                RowBox[{
                 RowBox[{"Max", "[", 
                  RowBox[{"m12", ",", 
                   RowBox[{"Mean", "[", "dnd1", "]"}]}], "]"}], "+", 
                 RowBox[{"3", 
                  RowBox[{"Max", "[", 
                   RowBox[{"s12", ",", 
                    RowBox[{"StandardDeviation", "[", "dnd1", "]"}]}], 
                   "]"}]}]}], ",", "mand1"}], "]"}]}], "}"}], ",", 
            RowBox[{"PlotRange", "->", "All"}], ",", 
            RowBox[{"Exclusions", "\[Rule]", "None"}], ",", 
            RowBox[{"AxesLabel", "->", 
             RowBox[{"{", 
              RowBox[{"\"\<1st measurand\>\"", ",", "\"\<\>\""}], "}"}]}], 
            ",", 
            RowBox[{
            "PlotLabel", "->", 
             "\"\<PDF of 1st measurand in nondiseased\>\""}], ",", 
            RowBox[{"PlotLegends", "->", 
             RowBox[{"Placed", "[", 
              RowBox[{
               RowBox[{"{", 
                RowBox[{"\"\<parametric PDF\>\"", ",", "\"\<KDE PDF\>\""}], 
                "}"}], ",", "Bottom"}], "]"}]}], ",", 
            RowBox[{"ImageSize", "->", "550"}], ",", 
            RowBox[{"PlotTheme", "->", "\"\<Scientific\>\""}], ",", 
            RowBox[{"Filling", "->", "Bottom"}]}], "]"}]}], "]"}], ",", 
        "\[IndentingNewLine]", "2", ",", "\n", "\t", 
        RowBox[{"Show", "[", 
         RowBox[{
          RowBox[{"Histogram", "[", 
           RowBox[{"nd2", ",", "\"\<Knuth\>\"", ",", "\"\<PDF\>\"", ",", 
            RowBox[{"ImageSize", "->", "550"}]}], "]"}], ",", 
          RowBox[{"Plot", "[", 
           RowBox[{
            RowBox[{"{", 
             RowBox[{
              RowBox[{"pdf", "[", 
               RowBox[{"x", ",", "m22", ",", "s22", ",", "dist22"}], "]"}], 
              ",", 
              RowBox[{"PDF", "[", 
               RowBox[{"dnd2", ",", "x"}], "]"}]}], "}"}], ",", 
            RowBox[{"{", 
             RowBox[{"x", ",", " ", 
              RowBox[{"Min", "[", 
               RowBox[{
                RowBox[{"Max", "[", 
                 RowBox[{
                  RowBox[{
                   RowBox[{"Min", "[", 
                    RowBox[{"m22", ",", 
                    RowBox[{"Mean", "[", "dnd2", "]"}]}], "]"}], "-", 
                   RowBox[{"3", 
                    RowBox[{"Max", "[", 
                    RowBox[{"s22", ",", 
                    RowBox[{"StandardDeviation", "[", "dnd2", "]"}]}], 
                    "]"}]}]}], ",", "0"}], "]"}], ",", "mind2"}], "]"}], ",", 
              " ", 
              RowBox[{"Max", "[", 
               RowBox[{
                RowBox[{
                 RowBox[{"Max", "[", 
                  RowBox[{"m22", ",", 
                   RowBox[{"Mean", "[", "dnd2", "]"}]}], "]"}], "+", 
                 RowBox[{"3", 
                  RowBox[{"Max", "[", 
                   RowBox[{"s22", ",", 
                    RowBox[{"StandardDeviation", "[", "dnd2", "]"}]}], 
                   "]"}]}]}], ",", "mand2"}], "]"}]}], "}"}], ",", 
            RowBox[{"PlotRange", "->", "All"}], ",", 
            RowBox[{"Exclusions", "\[Rule]", "None"}], ",", 
            RowBox[{"AxesLabel", "->", 
             RowBox[{"{", 
              RowBox[{"\"\< 2nd measurand\>\"", ",", "\"\<\>\""}], "}"}]}], 
            ",", 
            RowBox[{
            "PlotLabel", "->", 
             "\"\<PDF of 2nd measurand in nondiseased\>\""}], ",", 
            RowBox[{"PlotLegends", "->", 
             RowBox[{"Placed", "[", 
              RowBox[{
               RowBox[{"{", 
                RowBox[{"\"\<parametric PDF\>\"", ",", "\"\<KDE PDF\>\""}], 
                "}"}], ",", "Bottom"}], "]"}]}], ",", 
            RowBox[{"ImageSize", "->", "550"}], ",", 
            RowBox[{"PlotTheme", "->", "\"\<Scientific\>\""}], ",", 
            RowBox[{"Filling", "->", "Bottom"}]}], "]"}]}], "]"}], ",", 
        "\[IndentingNewLine]", "3", ",", "\[IndentingNewLine]", 
        RowBox[{"Show", "[", 
         RowBox[{
          RowBox[{"Histogram3D", "[", 
           RowBox[{"nd12", ",", "\"\<Knuth\>\"", ",", "\"\<PDF\>\"", ",", 
            RowBox[{"ImageSize", "->", "550"}]}], "]"}], ",", 
          RowBox[{"Plot3D", "[", 
           RowBox[{
            RowBox[{"{", 
             RowBox[{
              RowBox[{"pdf", "[", 
               RowBox[{
               "x", ",", "y", ",", "m12", ",", "s12", ",", "m22", ",", "s22", 
                ",", "cc2", ",", "dist12", ",", "dist22"}], "]"}], ",", 
              RowBox[{"PDF", "[", 
               RowBox[{"dnd12", ",", 
                RowBox[{"{", 
                 RowBox[{"x", ",", "y"}], "}"}]}], "]"}]}], "}"}], ",", 
            RowBox[{"{", 
             RowBox[{"x", ",", 
              RowBox[{"Min", "[", " ", 
               RowBox[{
                RowBox[{"Max", "[", 
                 RowBox[{
                  RowBox[{
                   RowBox[{"Min", "[", 
                    RowBox[{"m12", ",", 
                    RowBox[{"Mean", "[", "dnd1", "]"}]}], "]"}], "-", 
                   RowBox[{"3", 
                    RowBox[{"Max", "[", 
                    RowBox[{"s12", ",", 
                    RowBox[{"StandardDeviation", "[", "dnd1", "]"}]}], 
                    "]"}]}]}], ",", "0"}], "]"}], ",", "mind1"}], "]"}], ",", 
              RowBox[{"Max", "[", " ", 
               RowBox[{
                RowBox[{
                 RowBox[{"Max", "[", 
                  RowBox[{"m12", ",", 
                   RowBox[{"Mean", "[", "dnd1", "]"}]}], "]"}], "+", 
                 RowBox[{"3", 
                  RowBox[{"Max", "[", 
                   RowBox[{"s12", ",", 
                    RowBox[{"StandardDeviation", "[", "dnd1", "]"}]}], 
                   "]"}]}]}], ",", "mand1"}], "]"}]}], "}"}], ",", 
            RowBox[{"{", 
             RowBox[{"y", ",", " ", 
              RowBox[{"Min", "[", 
               RowBox[{
                RowBox[{"Max", "[", 
                 RowBox[{
                  RowBox[{
                   RowBox[{"Min", "[", 
                    RowBox[{"m22", ",", 
                    RowBox[{"Mean", "[", "dnd2", "]"}]}], "]"}], "-", 
                   RowBox[{"3", 
                    RowBox[{"Max", "[", 
                    RowBox[{"s22", ",", 
                    RowBox[{"StandardDeviation", "[", "dnd2", "]"}]}], 
                    "]"}]}]}], ",", "0"}], "]"}], ",", "mind2"}], "]"}], ",", 
              " ", 
              RowBox[{"Max", "[", 
               RowBox[{
                RowBox[{
                 RowBox[{"Max", "[", 
                  RowBox[{"m22", ",", 
                   RowBox[{"Mean", "[", "dnd2", "]"}]}], "]"}], "+", 
                 RowBox[{"3", 
                  RowBox[{"Max", "[", 
                   RowBox[{"s22", ",", 
                    RowBox[{"StandardDeviation", "[", "dnd2", "]"}]}], 
                   "]"}]}]}], ",", "mand2"}], "]"}]}], "}"}], ",", 
            RowBox[{"PlotRange", "->", "Full"}], ",", 
            RowBox[{"AxesLabel", "->", 
             RowBox[{"{", 
              RowBox[{
              "\"\<1st measurand\>\"", ",", "\"\< 2nd measurand\>\"", ",", 
               "\"\<\>\""}], "}"}]}], ",", 
            RowBox[{
            "PlotLabel", "->", 
             "\"\<bivariate PDF of 1st and 2nd measurands in \
nondiseased\>\""}], ",", 
            RowBox[{"PlotLegends", "->", 
             RowBox[{"Placed", "[", 
              RowBox[{
               RowBox[{"{", 
                RowBox[{"\"\<parametric PDF\>\"", ",", "\"\<KDE PDF\>\""}], 
                "}"}], ",", "Bottom"}], "]"}]}], ",", 
            RowBox[{"ImageSize", "->", "550"}], ",", 
            RowBox[{"PlotTheme", "->", "\"\<Scientific\>\""}]}], "]"}]}], 
         "]"}]}], "]"}]}], "]"}], "]"}]}], ";"}], "\[IndentingNewLine]", 
 RowBox[{
  RowBox[{
   RowBox[{"qqp1", "[", 
    RowBox[{
    "m11_", ",", "s11_", ",", "m12_", ",", "s12_", ",", "m21_", ",", "s21_", 
     ",", "m22_", ",", "s22_", ",", "dist111_", ",", "dist121_", ",", 
     "dist211_", ",", "dist221_", ",", "dist112_", ",", "dist122_", ",", 
     "dist212_", ",", "dist222_", ",", "msr_", ",", "pop_"}], "]"}], ":=", 
   "\[IndentingNewLine]", 
   RowBox[{"Switch", "[", 
    RowBox[{
    "pop", ",", "\[IndentingNewLine]", "1", ",", "\[IndentingNewLine]", 
     RowBox[{"Switch", "[", 
      RowBox[{
      "msr", ",", "\[IndentingNewLine]", "1", ",", "\[IndentingNewLine]", 
       RowBox[{"Show", "[", 
        RowBox[{
         RowBox[{"Legended", "[", 
          RowBox[{
           RowBox[{"QuantilePlot", "[", 
            RowBox[{"d1", ",", 
             RowBox[{"pdist", "[", 
              RowBox[{"m11", ",", "s11", ",", "dist111"}], "]"}], ",", 
             RowBox[{"Frame", "->", "True"}], ",", 
             RowBox[{"ImageSize", "->", "550"}], ",", 
             RowBox[{"PlotRange", "->", "All"}], ",", 
             RowBox[{"PlotStyle", "\[Rule]", 
              RowBox[{"{", 
               TemplateBox[<|"color" -> RGBColor[0.9, 0.36, 0.054]|>,
                "RGBColorSwatchTemplate"], "}"}]}], ",", 
             RowBox[{"FrameLabel", "->", 
              RowBox[{"{", 
               RowBox[{
               "\"\<distribution quantiles\>\"", ",", 
                "\"\<sample quantiles\>\""}], "}"}]}], ",", 
             RowBox[{
             "PlotLabel", "->", 
              "\"\<Q-Q plot for 1st measurand in diseased\>\""}], ",", 
             RowBox[{"ReferenceLineStyle", "->", 
              RowBox[{"Directive", "[", 
               RowBox[{"Black", ",", "Thin", ",", 
                RowBox[{"Dashing", "[", 
                 RowBox[{"{", "}"}], "]"}]}], "]"}]}]}], "]"}], ",", 
           RowBox[{"PointLegend", "[", 
            RowBox[{
             RowBox[{"{", 
              TemplateBox[<|"color" -> RGBColor[0.9, 0.36, 0.054]|>,
               "RGBColorSwatchTemplate"], "}"}], ",", 
             RowBox[{"{", "\"\<1st set\>\"", "}"}]}], "]"}]}], "]"}], ",", 
         RowBox[{"Legended", "[", 
          RowBox[{
           RowBox[{"QuantilePlot", "[", 
            RowBox[{"d1", ",", 
             RowBox[{"pdist", "[", 
              RowBox[{"m11", ",", "s11", ",", "dist112"}], "]"}], ",", 
             RowBox[{"Frame", "->", "True"}], ",", 
             RowBox[{"ImageSize", "->", "550"}], ",", 
             RowBox[{"PlotRange", "->", "All"}], ",", 
             RowBox[{"PlotStyle", "\[Rule]", 
              RowBox[{"{", 
               
               TemplateBox[<|
                "color" -> RGBColor[0.365248, 0.427802, 0.758297]|>,
                "RGBColorSwatchTemplate"], "}"}]}], ",", 
             RowBox[{"FrameLabel", "->", 
              RowBox[{"{", 
               RowBox[{
               "\"\<distribution quantiles\>\"", ",", 
                "\"\<sample quantiles\>\""}], "}"}]}], ",", 
             RowBox[{
             "PlotLabel", "->", 
              "\"\<Q-Q plot for 1st measurand in diseased\>\""}], ",", 
             RowBox[{"ReferenceLineStyle", "->", 
              RowBox[{"Directive", "[", 
               RowBox[{"Black", ",", "Thin", ",", 
                RowBox[{"Dashing", "[", 
                 RowBox[{"{", "}"}], "]"}]}], "]"}]}]}], "]"}], ",", 
           RowBox[{"PointLegend", "[", 
            RowBox[{
             RowBox[{"{", 
              TemplateBox[<|"color" -> RGBColor[0.365248, 0.427802, 0.758297]|>,
               "RGBColorSwatchTemplate"], "}"}], ",", 
             RowBox[{"{", "\"\<2nd set\>\"", "}"}]}], "]"}]}], "]"}]}], "]"}],
        ",", "\[IndentingNewLine]", "2", ",", "\[IndentingNewLine]", 
       RowBox[{"Show", "[", 
        RowBox[{
         RowBox[{"Legended", "[", 
          RowBox[{
           RowBox[{"QuantilePlot", "[", 
            RowBox[{"d2", ",", 
             RowBox[{"pdist", "[", 
              RowBox[{"m21", ",", "s21", ",", "dist211"}], "]"}], ",", 
             RowBox[{"Frame", "->", "True"}], ",", 
             RowBox[{"ImageSize", "->", "550"}], ",", 
             RowBox[{"PlotRange", "->", "All"}], ",", 
             RowBox[{"PlotStyle", "\[Rule]", 
              RowBox[{"{", 
               TemplateBox[<|"color" -> RGBColor[0.9, 0.36, 0.054]|>,
                "RGBColorSwatchTemplate"], "}"}]}], ",", 
             RowBox[{"FrameLabel", "->", 
              RowBox[{"{", 
               RowBox[{
               "\"\<distribution quantiles\>\"", ",", 
                "\"\<sample quantiles\>\""}], "}"}]}], ",", 
             RowBox[{
             "PlotLabel", "->", 
              "\"\<Q-Q plot for 2nd measurand in diseased\>\""}], ",", 
             RowBox[{"ReferenceLineStyle", "->", 
              RowBox[{"Directive", "[", 
               RowBox[{"Black", ",", "Thin", ",", 
                RowBox[{"Dashing", "[", 
                 RowBox[{"{", "}"}], "]"}]}], "]"}]}]}], "]"}], ",", 
           RowBox[{"PointLegend", "[", 
            RowBox[{
             RowBox[{"{", 
              TemplateBox[<|"color" -> RGBColor[0.9, 0.36, 0.054]|>,
               "RGBColorSwatchTemplate"], "}"}], ",", 
             RowBox[{"{", "\"\<1st set\>\"", "}"}]}], "]"}]}], "]"}], ",", 
         RowBox[{"Legended", "[", 
          RowBox[{
           RowBox[{"QuantilePlot", "[", 
            RowBox[{"d2", ",", 
             RowBox[{"pdist", "[", 
              RowBox[{"m21", ",", "s21", ",", "dist212"}], "]"}], ",", 
             RowBox[{"Frame", "->", "True"}], ",", 
             RowBox[{"ImageSize", "->", "550"}], ",", 
             RowBox[{"PlotRange", "->", "All"}], ",", 
             RowBox[{"PlotStyle", "\[Rule]", 
              RowBox[{"{", 
               
               TemplateBox[<|
                "color" -> RGBColor[0.365248, 0.427802, 0.758297]|>,
                "RGBColorSwatchTemplate"], "}"}]}], ",", 
             RowBox[{"FrameLabel", "->", 
              RowBox[{"{", 
               RowBox[{
               "\"\<distribution quantiles\>\"", ",", 
                "\"\<sample quantiles\>\""}], "}"}]}], ",", 
             RowBox[{
             "PlotLabel", "->", 
              "\"\<Q-Q plot for 2nd measurand in diseased\>\""}], ",", 
             RowBox[{"ReferenceLineStyle", "->", 
              RowBox[{"Directive", "[", 
               RowBox[{"Black", ",", "Thin", ",", 
                RowBox[{"Dashing", "[", 
                 RowBox[{"{", "}"}], "]"}]}], "]"}]}]}], "]"}], ",", 
           RowBox[{"PointLegend", "[", 
            RowBox[{
             RowBox[{"{", 
              TemplateBox[<|"color" -> RGBColor[0.365248, 0.427802, 0.758297]|>,
               "RGBColorSwatchTemplate"], "}"}], ",", 
             RowBox[{"{", "\"\<2nd set\>\"", "}"}]}], "]"}]}], "]"}]}], 
        "]"}]}], "]"}], ",", "\[IndentingNewLine]", "2", ",", 
     "\[IndentingNewLine]", 
     RowBox[{"Switch", "[", 
      RowBox[{
      "msr", ",", "\[IndentingNewLine]", "1", ",", "\[IndentingNewLine]", 
       RowBox[{"Show", "[", 
        RowBox[{
         RowBox[{"Legended", "[", 
          RowBox[{
           RowBox[{"QuantilePlot", "[", 
            RowBox[{"nd1", ",", 
             RowBox[{"pdist", "[", 
              RowBox[{"m12", ",", "s12", ",", "dist121"}], "]"}], ",", 
             RowBox[{"Frame", "->", "True"}], ",", 
             RowBox[{"ImageSize", "->", "550"}], ",", 
             RowBox[{"PlotRange", "->", "All"}], ",", 
             RowBox[{"PlotStyle", "\[Rule]", 
              RowBox[{"{", 
               TemplateBox[<|"color" -> RGBColor[0.9, 0.36, 0.054]|>,
                "RGBColorSwatchTemplate"], "}"}]}], ",", 
             RowBox[{"FrameLabel", "->", 
              RowBox[{"{", 
               RowBox[{
               "\"\<distribution quantiles\>\"", ",", 
                "\"\<sample quantiles\>\""}], "}"}]}], ",", 
             RowBox[{
             "PlotLabel", "->", 
              "\"\<Q-Q plot for 1st measurand in nondiseased\>\""}], ",", 
             RowBox[{"ReferenceLineStyle", "->", 
              RowBox[{"Directive", "[", 
               RowBox[{"Black", ",", "Thin", ",", 
                RowBox[{"Dashing", "[", 
                 RowBox[{"{", "}"}], "]"}]}], "]"}]}]}], "]"}], ",", 
           RowBox[{"PointLegend", "[", 
            RowBox[{
             RowBox[{"{", 
              TemplateBox[<|"color" -> RGBColor[0.9, 0.36, 0.054]|>,
               "RGBColorSwatchTemplate"], "}"}], ",", 
             RowBox[{"{", "\"\<1st set\>\"", "}"}]}], "]"}]}], "]"}], ",", 
         RowBox[{"Legended", "[", 
          RowBox[{
           RowBox[{"QuantilePlot", "[", 
            RowBox[{"nd1", ",", 
             RowBox[{"pdist", "[", 
              RowBox[{"m12", ",", "s12", ",", "dist122"}], "]"}], ",", 
             RowBox[{"Frame", "->", "True"}], ",", 
             RowBox[{"ImageSize", "->", "550"}], ",", 
             RowBox[{"PlotRange", "->", "All"}], ",", 
             RowBox[{"PlotStyle", "\[Rule]", 
              RowBox[{"{", 
               
               TemplateBox[<|
                "color" -> RGBColor[0.365248, 0.427802, 0.758297]|>,
                "RGBColorSwatchTemplate"], "}"}]}], ",", 
             RowBox[{"FrameLabel", "->", 
              RowBox[{"{", 
               RowBox[{
               "\"\<distribution quantiles\>\"", ",", 
                "\"\<sample quantiles\>\""}], "}"}]}], ",", 
             RowBox[{
             "PlotLabel", "->", 
              "\"\<Q-Q plot for 1st measurand in nondiseased\>\""}], ",", 
             RowBox[{"ReferenceLineStyle", "->", 
              RowBox[{"Directive", "[", 
               RowBox[{"Black", ",", "Thin", ",", 
                RowBox[{"Dashing", "[", 
                 RowBox[{"{", "}"}], "]"}]}], "]"}]}]}], "]"}], ",", 
           RowBox[{"PointLegend", "[", 
            RowBox[{
             RowBox[{"{", 
              TemplateBox[<|"color" -> RGBColor[0.365248, 0.427802, 0.758297]|>,
               "RGBColorSwatchTemplate"], "}"}], ",", 
             RowBox[{"{", "\"\<2nd set\>\"", "}"}]}], "]"}]}], "]"}]}], "]"}],
        ",", "\[IndentingNewLine]", "2", ",", "\[IndentingNewLine]", 
       RowBox[{"Show", "[", 
        RowBox[{
         RowBox[{"Legended", "[", 
          RowBox[{
           RowBox[{"QuantilePlot", "[", 
            RowBox[{"nd2", ",", 
             RowBox[{"pdist", "[", 
              RowBox[{"m22", ",", "s22", ",", "dist221"}], "]"}], ",", 
             RowBox[{"Frame", "->", "True"}], ",", 
             RowBox[{"ImageSize", "->", "550"}], ",", 
             RowBox[{"PlotRange", "->", "All"}], ",", 
             RowBox[{"PlotStyle", "\[Rule]", 
              RowBox[{"{", 
               TemplateBox[<|"color" -> RGBColor[0.9, 0.36, 0.054]|>,
                "RGBColorSwatchTemplate"], "}"}]}], ",", 
             RowBox[{"FrameLabel", "->", 
              RowBox[{"{", 
               RowBox[{
               "\"\<distribution quantiles\>\"", ",", 
                "\"\<sample quantiles\>\""}], "}"}]}], ",", 
             RowBox[{
             "PlotLabel", "->", 
              "\"\<Q-Q plot for 2nd measurand in nondiseased\>\""}], ",", 
             RowBox[{"ReferenceLineStyle", "->", 
              RowBox[{"Directive", "[", 
               RowBox[{"Black", ",", "Thin", ",", 
                RowBox[{"Dashing", "[", 
                 RowBox[{"{", "}"}], "]"}]}], "]"}]}]}], "]"}], ",", 
           RowBox[{"PointLegend", "[", 
            RowBox[{
             RowBox[{"{", 
              TemplateBox[<|"color" -> RGBColor[0.9, 0.36, 0.054]|>,
               "RGBColorSwatchTemplate"], "}"}], ",", 
             RowBox[{"{", "\"\<1st set\>\"", "}"}]}], "]"}]}], "]"}], ",", 
         RowBox[{"Legended", "[", 
          RowBox[{
           RowBox[{"QuantilePlot", "[", 
            RowBox[{"nd2", ",", 
             RowBox[{"pdist", "[", 
              RowBox[{"m22", ",", "s22", ",", "dist222"}], "]"}], ",", 
             RowBox[{"Frame", "->", "True"}], ",", 
             RowBox[{"ImageSize", "->", "550"}], ",", 
             RowBox[{"PlotRange", "->", "All"}], ",", 
             RowBox[{"PlotStyle", "\[Rule]", 
              RowBox[{"{", 
               
               TemplateBox[<|
                "color" -> RGBColor[0.365248, 0.427802, 0.758297]|>,
                "RGBColorSwatchTemplate"], "}"}]}], ",", 
             RowBox[{"FrameLabel", "->", 
              RowBox[{"{", 
               RowBox[{
               "\"\<distribution quantiles\>\"", ",", 
                "\"\<sample quantiles\>\""}], "}"}]}], ",", 
             RowBox[{
             "PlotLabel", "->", 
              "\"\<Q-Q plot for 2nd measurand in nondiseased\>\""}], ",", 
             RowBox[{"ReferenceLineStyle", "->", 
              RowBox[{"Directive", "[", 
               RowBox[{"Black", ",", "Thin", ",", 
                RowBox[{"Dashing", "[", 
                 RowBox[{"{", "}"}], "]"}]}], "]"}]}]}], "]"}], ",", 
           RowBox[{"PointLegend", "[", 
            RowBox[{
             RowBox[{"{", 
              TemplateBox[<|"color" -> RGBColor[0.365248, 0.427802, 0.758297]|>,
               "RGBColorSwatchTemplate"], "}"}], ",", 
             RowBox[{"{", "\"\<2nd set\>\"", "}"}]}], "]"}]}], "]"}]}], 
        "]"}]}], "]"}]}], "]"}]}], ";"}], "\[IndentingNewLine]", 
 RowBox[{
  RowBox[{
   RowBox[{"qqp2", "[", 
    RowBox[{
    "dd11_", ",", "dd12_", ",", "dd21_", ",", "dd22_", ",", "dnd11_", ",", 
     "dnd12_", ",", "dnd21_", ",", "dnd22_", ",", "msr_", ",", "pop_"}], 
    "]"}], ":=", "\[IndentingNewLine]", 
   RowBox[{"Switch", "[", 
    RowBox[{
    "pop", ",", "\[IndentingNewLine]", "1", ",", "\[IndentingNewLine]", 
     RowBox[{"Switch", "[", 
      RowBox[{
      "msr", ",", "\[IndentingNewLine]", "1", ",", "\[IndentingNewLine]", 
       RowBox[{"Show", "[", 
        RowBox[{
         RowBox[{"Legended", "[", 
          RowBox[{
           RowBox[{"QuantilePlot", "[", 
            RowBox[{"d1", ",", "dd11", ",", 
             RowBox[{"Frame", "->", "True"}], ",", 
             RowBox[{"ImageSize", "->", "550"}], ",", 
             RowBox[{"PlotRange", "->", "All"}], ",", 
             RowBox[{"PlotStyle", "\[Rule]", 
              RowBox[{"{", 
               TemplateBox[<|"color" -> RGBColor[0.9, 0.36, 0.054]|>,
                "RGBColorSwatchTemplate"], "}"}]}], ",", 
             RowBox[{"FrameLabel", "->", 
              RowBox[{"{", 
               RowBox[{
               "\"\<distribution quantiles\>\"", ",", 
                "\"\<sample quantiles\>\""}], "}"}]}], ",", 
             RowBox[{
             "PlotLabel", "->", 
              "\"\<Q_Q plot for 1st measurand in diseased\>\""}], ",", 
             RowBox[{"ReferenceLineStyle", "->", 
              RowBox[{"Directive", "[", 
               RowBox[{"Black", ",", "Thin", ",", 
                RowBox[{"Dashing", "[", 
                 RowBox[{"{", "}"}], "]"}]}], "]"}]}]}], "]"}], ",", 
           RowBox[{"PointLegend", "[", 
            RowBox[{
             RowBox[{"{", 
              TemplateBox[<|"color" -> RGBColor[0.9, 0.36, 0.054]|>,
               "RGBColorSwatchTemplate"], "}"}], ",", 
             RowBox[{"{", "\"\<1st kernel\>\"", "}"}]}], "]"}]}], "]"}], ",", 
         RowBox[{"Legended", "[", 
          RowBox[{
           RowBox[{"QuantilePlot", "[", 
            RowBox[{"d1", ",", "dd12", ",", 
             RowBox[{"Frame", "->", "True"}], ",", 
             RowBox[{"ImageSize", "->", "550"}], ",", 
             RowBox[{"PlotRange", "->", "All"}], ",", 
             RowBox[{"PlotStyle", "\[Rule]", 
              RowBox[{"{", 
               
               TemplateBox[<|
                "color" -> RGBColor[0.365248, 0.427802, 0.758297]|>,
                "RGBColorSwatchTemplate"], "}"}]}], ",", 
             RowBox[{"FrameLabel", "->", 
              RowBox[{"{", 
               RowBox[{
               "\"\<distribution quantiles\>\"", ",", 
                "\"\<sample quantiles\>\""}], "}"}]}], ",", 
             RowBox[{
             "PlotLabel", "->", 
              "\"\<Q_Q plot for 1st measurand in diseased\>\""}], ",", 
             RowBox[{"ReferenceLineStyle", "->", 
              RowBox[{"Directive", "[", 
               RowBox[{"Black", ",", "Thin", ",", 
                RowBox[{"Dashing", "[", 
                 RowBox[{"{", "}"}], "]"}]}], "]"}]}]}], "]"}], ",", 
           RowBox[{"PointLegend", "[", 
            RowBox[{
             RowBox[{"{", 
              TemplateBox[<|"color" -> RGBColor[0.365248, 0.427802, 0.758297]|>,
               "RGBColorSwatchTemplate"], "}"}], ",", 
             RowBox[{"{", "\"\<2nd kernel\>\"", "}"}]}], "]"}]}], "]"}]}], 
        "]"}], ",", "\[IndentingNewLine]", "2", ",", "\[IndentingNewLine]", 
       RowBox[{"Show", "[", 
        RowBox[{
         RowBox[{"Legended", "[", 
          RowBox[{
           RowBox[{"QuantilePlot", "[", 
            RowBox[{"d2", ",", "dd21", ",", 
             RowBox[{"Frame", "->", "True"}], ",", 
             RowBox[{"ImageSize", "->", "550"}], ",", 
             RowBox[{"PlotRange", "->", "All"}], ",", 
             RowBox[{"PlotStyle", "\[Rule]", 
              RowBox[{"{", 
               TemplateBox[<|"color" -> RGBColor[0.9, 0.36, 0.054]|>,
                "RGBColorSwatchTemplate"], "}"}]}], ",", 
             RowBox[{"FrameLabel", "->", 
              RowBox[{"{", 
               RowBox[{
               "\"\<distribution quantiles\>\"", ",", 
                "\"\<sample quantiles\>\""}], "}"}]}], ",", 
             RowBox[{
             "PlotLabel", "->", 
              "\"\<Q_Q plot for 2nd measurand in diseased\>\""}], ",", 
             RowBox[{"ReferenceLineStyle", "->", 
              RowBox[{"Directive", "[", 
               RowBox[{"Black", ",", "Thin", ",", 
                RowBox[{"Dashing", "[", 
                 RowBox[{"{", "}"}], "]"}]}], "]"}]}]}], "]"}], ",", 
           RowBox[{"PointLegend", "[", 
            RowBox[{
             RowBox[{"{", 
              TemplateBox[<|"color" -> RGBColor[0.9, 0.36, 0.054]|>,
               "RGBColorSwatchTemplate"], "}"}], ",", 
             RowBox[{"{", "\"\<1st kernel\>\"", "}"}]}], "]"}]}], "]"}], ",", 
         RowBox[{"Legended", "[", 
          RowBox[{
           RowBox[{"QuantilePlot", "[", 
            RowBox[{"d2", ",", "dd22", ",", 
             RowBox[{"Frame", "->", "True"}], ",", 
             RowBox[{"ImageSize", "->", "550"}], ",", 
             RowBox[{"PlotRange", "->", "All"}], ",", 
             RowBox[{"PlotStyle", "\[Rule]", 
              RowBox[{"{", 
               
               TemplateBox[<|
                "color" -> RGBColor[0.365248, 0.427802, 0.758297]|>,
                "RGBColorSwatchTemplate"], "}"}]}], ",", 
             RowBox[{"FrameLabel", "->", 
              RowBox[{"{", 
               RowBox[{
               "\"\<distribution quantiles\>\"", ",", 
                "\"\<sample quantiles\>\""}], "}"}]}], ",", 
             RowBox[{
             "PlotLabel", "->", 
              "\"\<Q_Q plot for 2nd measurand in diseased\>\""}], ",", 
             RowBox[{"ReferenceLineStyle", "->", 
              RowBox[{"Directive", "[", 
               RowBox[{"Black", ",", "Thin", ",", 
                RowBox[{"Dashing", "[", 
                 RowBox[{"{", "}"}], "]"}]}], "]"}]}]}], "]"}], ",", 
           RowBox[{"PointLegend", "[", 
            RowBox[{
             RowBox[{"{", 
              TemplateBox[<|"color" -> RGBColor[0.365248, 0.427802, 0.758297]|>,
               "RGBColorSwatchTemplate"], "}"}], ",", 
             RowBox[{"{", "\"\<2nd kernel\>\"", "}"}]}], "]"}]}], "]"}]}], 
        "]"}]}], "]"}], ",", "\[IndentingNewLine]", "2", ",", 
     "\[IndentingNewLine]", 
     RowBox[{"Switch", "[", 
      RowBox[{
      "msr", ",", "\[IndentingNewLine]", "1", ",", "\[IndentingNewLine]", 
       RowBox[{"Show", "[", 
        RowBox[{
         RowBox[{"Legended", "[", 
          RowBox[{
           RowBox[{"QuantilePlot", "[", 
            RowBox[{"nd1", ",", "dnd11", ",", 
             RowBox[{"Frame", "->", "True"}], ",", 
             RowBox[{"ImageSize", "->", "550"}], ",", 
             RowBox[{"PlotRange", "->", "All"}], ",", 
             RowBox[{"PlotStyle", "\[Rule]", 
              RowBox[{"{", 
               TemplateBox[<|"color" -> RGBColor[0.9, 0.36, 0.054]|>,
                "RGBColorSwatchTemplate"], "}"}]}], ",", 
             RowBox[{"FrameLabel", "->", 
              RowBox[{"{", 
               RowBox[{
               "\"\<distribution quantiles\>\"", ",", 
                "\"\<sample quantiles\>\""}], "}"}]}], ",", 
             RowBox[{
             "PlotLabel", "->", 
              "\"\<Q_Q plot for 1st measurand in nondiseased\>\""}], ",", 
             RowBox[{"ReferenceLineStyle", "->", 
              RowBox[{"Directive", "[", 
               RowBox[{"Black", ",", "Thin", ",", 
                RowBox[{"Dashing", "[", 
                 RowBox[{"{", "}"}], "]"}]}], "]"}]}]}], "]"}], ",", 
           RowBox[{"PointLegend", "[", 
            RowBox[{
             RowBox[{"{", 
              TemplateBox[<|"color" -> RGBColor[0.9, 0.36, 0.054]|>,
               "RGBColorSwatchTemplate"], "}"}], ",", 
             RowBox[{"{", "\"\<1st kernel\>\"", "}"}]}], "]"}]}], "]"}], ",", 
         RowBox[{"Legended", "[", 
          RowBox[{
           RowBox[{"QuantilePlot", "[", 
            RowBox[{"nd1", ",", "dnd12", ",", 
             RowBox[{"Frame", "->", "True"}], ",", 
             RowBox[{"ImageSize", "->", "550"}], ",", 
             RowBox[{"PlotRange", "->", "All"}], ",", 
             RowBox[{"PlotStyle", "\[Rule]", 
              RowBox[{"{", 
               
               TemplateBox[<|
                "color" -> RGBColor[0.365248, 0.427802, 0.758297]|>,
                "RGBColorSwatchTemplate"], "}"}]}], ",", 
             RowBox[{"FrameLabel", "->", 
              RowBox[{"{", 
               RowBox[{
               "\"\<distribution quantiles\>\"", ",", 
                "\"\<sample quantiles\>\""}], "}"}]}], ",", 
             RowBox[{
             "PlotLabel", "->", 
              "\"\<Q_Q plot for 1st measurand in nondiseased\>\""}], ",", 
             RowBox[{"ReferenceLineStyle", "->", 
              RowBox[{"Directive", "[", 
               RowBox[{"Black", ",", "Thin", ",", 
                RowBox[{"Dashing", "[", 
                 RowBox[{"{", "}"}], "]"}]}], "]"}]}]}], "]"}], ",", 
           RowBox[{"PointLegend", "[", 
            RowBox[{
             RowBox[{"{", 
              TemplateBox[<|"color" -> RGBColor[0.365248, 0.427802, 0.758297]|>,
               "RGBColorSwatchTemplate"], "}"}], ",", 
             RowBox[{"{", "\"\<2nd kernel\>\"", "}"}]}], "]"}]}], "]"}]}], 
        "]"}], ",", "\[IndentingNewLine]", "2", ",", "\[IndentingNewLine]", 
       RowBox[{"Show", "[", 
        RowBox[{
         RowBox[{"Legended", "[", 
          RowBox[{
           RowBox[{"QuantilePlot", "[", 
            RowBox[{"nd2", ",", "dnd21", ",", 
             RowBox[{"Frame", "->", "True"}], ",", 
             RowBox[{"ImageSize", "->", "550"}], ",", 
             RowBox[{"PlotRange", "->", "All"}], ",", 
             RowBox[{"PlotStyle", "\[Rule]", 
              RowBox[{"{", 
               TemplateBox[<|"color" -> RGBColor[0.9, 0.36, 0.054]|>,
                "RGBColorSwatchTemplate"], "}"}]}], ",", 
             RowBox[{"FrameLabel", "->", 
              RowBox[{"{", 
               RowBox[{
               "\"\<distribution quantiles\>\"", ",", 
                "\"\<sample quantiles\>\""}], "}"}]}], ",", 
             RowBox[{
             "PlotLabel", "->", 
              "\"\<Q_Q plot for 2nd measurand in nondiseased\>\""}], ",", 
             RowBox[{"ReferenceLineStyle", "->", 
              RowBox[{"Directive", "[", 
               RowBox[{"Black", ",", "Thin", ",", 
                RowBox[{"Dashing", "[", 
                 RowBox[{"{", "}"}], "]"}]}], "]"}]}]}], "]"}], ",", 
           RowBox[{"PointLegend", "[", 
            RowBox[{
             RowBox[{"{", 
              TemplateBox[<|"color" -> RGBColor[0.9, 0.36, 0.054]|>,
               "RGBColorSwatchTemplate"], "}"}], ",", 
             RowBox[{"{", "\"\<1st kernel\>\"", "}"}]}], "]"}]}], "]"}], ",", 
         RowBox[{"Legended", "[", 
          RowBox[{
           RowBox[{"QuantilePlot", "[", 
            RowBox[{"nd2", ",", "dnd22", ",", 
             RowBox[{"Frame", "->", "True"}], ",", 
             RowBox[{"ImageSize", "->", "550"}], ",", 
             RowBox[{"PlotRange", "->", "All"}], ",", 
             RowBox[{"PlotStyle", "\[Rule]", 
              RowBox[{"{", 
               
               TemplateBox[<|
                "color" -> RGBColor[0.365248, 0.427802, 0.758297]|>,
                "RGBColorSwatchTemplate"], "}"}]}], ",", 
             RowBox[{"FrameLabel", "->", 
              RowBox[{"{", 
               RowBox[{
               "\"\<distribution quantiles\>\"", ",", 
                "\"\<sample quantiles\>\""}], "}"}]}], ",", 
             RowBox[{
             "PlotLabel", "->", 
              "\"\<Q_Q plot for 2nd measurand in nondiseased\>\""}], ",", 
             RowBox[{"ReferenceLineStyle", "->", 
              RowBox[{"Directive", "[", 
               RowBox[{"Black", ",", "Thin", ",", 
                RowBox[{"Dashing", "[", 
                 RowBox[{"{", "}"}], "]"}]}], "]"}]}]}], "]"}], ",", 
           RowBox[{"PointLegend", "[", 
            RowBox[{
             RowBox[{"{", 
              TemplateBox[<|"color" -> RGBColor[0.365248, 0.427802, 0.758297]|>,
               "RGBColorSwatchTemplate"], "}"}], ",", 
             RowBox[{"{", "\"\<2nd kernel\>\"", "}"}]}], "]"}]}], "]"}]}], 
        "]"}]}], "]"}]}], "]"}]}], ";"}], "\[IndentingNewLine]", 
 RowBox[{
  RowBox[{
   RowBox[{"qqp3", "[", 
    RowBox[{
    "m11_", ",", "s11_", ",", "m12_", ",", "s12_", ",", "m21_", ",", "s21_", 
     ",", "m22_", ",", "s22_", ",", "dist11_", ",", "dist12_", ",", "dist21_",
      ",", "dist22_", ",", "dd1_", ",", "dd2_", ",", "dnd1_", ",", "dnd2_", 
     ",", "msr_", ",", "pop_"}], "]"}], ":=", "\[IndentingNewLine]", 
   RowBox[{"Switch", "[", 
    RowBox[{
    "pop", ",", "\[IndentingNewLine]", "1", ",", "\[IndentingNewLine]", 
     RowBox[{"Switch", "[", 
      RowBox[{
      "msr", ",", "\[IndentingNewLine]", "1", ",", "\[IndentingNewLine]", 
       RowBox[{"Show", "[", 
        RowBox[{
         RowBox[{"Legended", "[", 
          RowBox[{
           RowBox[{"QuantilePlot", "[", 
            RowBox[{"d1", ",", 
             RowBox[{"pdist", "[", 
              RowBox[{"m11", ",", "s11", ",", "dist11"}], "]"}], ",", 
             RowBox[{"Frame", "->", "True"}], ",", 
             RowBox[{"ImageSize", "->", "550"}], ",", 
             RowBox[{"PlotRange", "->", "All"}], ",", 
             RowBox[{"PlotStyle", "\[Rule]", 
              RowBox[{"{", 
               TemplateBox[<|"color" -> RGBColor[0.9, 0.36, 0.054]|>,
                "RGBColorSwatchTemplate"], "}"}]}], ",", 
             RowBox[{"FrameLabel", "->", 
              RowBox[{"{", 
               RowBox[{
               "\"\<distribution quantiles\>\"", ",", 
                "\"\<sample quantiles\>\""}], "}"}]}], ",", 
             RowBox[{
             "PlotLabel", "->", 
              "\"\<Q-Q plot for 1st measurand in diseased\>\""}], ",", 
             RowBox[{"ReferenceLineStyle", "->", 
              RowBox[{"Directive", "[", 
               RowBox[{"Black", ",", "Thin", ",", 
                RowBox[{"Dashing", "[", 
                 RowBox[{"{", "}"}], "]"}]}], "]"}]}]}], "]"}], ",", 
           RowBox[{"PointLegend", "[", 
            RowBox[{
             RowBox[{"{", 
              TemplateBox[<|"color" -> RGBColor[0.9, 0.36, 0.054]|>,
               "RGBColorSwatchTemplate"], "}"}], ",", 
             RowBox[{"{", "\"\<parametric\>\"", "}"}]}], "]"}]}], "]"}], ",", 
         RowBox[{"Legended", "[", 
          RowBox[{
           RowBox[{"QuantilePlot", "[", 
            RowBox[{"d1", ",", "dd1", ",", 
             RowBox[{"Frame", "->", "True"}], ",", 
             RowBox[{"ImageSize", "->", "550"}], ",", 
             RowBox[{"PlotRange", "->", "All"}], ",", 
             RowBox[{"PlotStyle", "\[Rule]", 
              RowBox[{"{", 
               
               TemplateBox[<|
                "color" -> RGBColor[0.365248, 0.427802, 0.758297]|>,
                "RGBColorSwatchTemplate"], "}"}]}], ",", 
             RowBox[{"FrameLabel", "->", 
              RowBox[{"{", 
               RowBox[{
               "\"\<distribution quantiles\>\"", ",", 
                "\"\<sample quantiles\>\""}], "}"}]}], ",", 
             RowBox[{
             "PlotLabel", "->", 
              "\"\<Q-Q plot for 1st measurand in diseased\>\""}], ",", 
             RowBox[{"ReferenceLineStyle", "->", 
              RowBox[{"Directive", "[", 
               RowBox[{"Black", ",", "Thin", ",", 
                RowBox[{"Dashing", "[", 
                 RowBox[{"{", "}"}], "]"}]}], "]"}]}]}], "]"}], ",", 
           RowBox[{"PointLegend", "[", 
            RowBox[{
             RowBox[{"{", 
              TemplateBox[<|"color" -> RGBColor[0.365248, 0.427802, 0.758297]|>,
               "RGBColorSwatchTemplate"], "}"}], ",", 
             RowBox[{"{", "\"\<KDE\>\"", "}"}]}], "]"}]}], "]"}]}], "]"}], 
       ",", "\[IndentingNewLine]", "2", ",", "\[IndentingNewLine]", 
       RowBox[{"Show", "[", 
        RowBox[{
         RowBox[{"Legended", "[", 
          RowBox[{
           RowBox[{"QuantilePlot", "[", 
            RowBox[{"d2", ",", 
             RowBox[{"pdist", "[", 
              RowBox[{"m21", ",", "s21", ",", "dist21"}], "]"}], ",", 
             RowBox[{"Frame", "->", "True"}], ",", 
             RowBox[{"ImageSize", "->", "550"}], ",", 
             RowBox[{"PlotRange", "->", "All"}], ",", 
             RowBox[{"PlotStyle", "\[Rule]", 
              RowBox[{"{", 
               TemplateBox[<|"color" -> RGBColor[0.9, 0.36, 0.054]|>,
                "RGBColorSwatchTemplate"], "}"}]}], ",", 
             RowBox[{"FrameLabel", "->", 
              RowBox[{"{", 
               RowBox[{
               "\"\<distribution quantiles\>\"", ",", 
                "\"\<sample quantiles\>\""}], "}"}]}], ",", 
             RowBox[{
             "PlotLabel", "->", 
              "\"\<Q-Q plot for 2nd measurand in diseased\>\""}], ",", 
             RowBox[{"ReferenceLineStyle", "->", 
              RowBox[{"Directive", "[", 
               RowBox[{"Black", ",", "Thin", ",", 
                RowBox[{"Dashing", "[", 
                 RowBox[{"{", "}"}], "]"}]}], "]"}]}]}], "]"}], ",", 
           RowBox[{"PointLegend", "[", 
            RowBox[{
             RowBox[{"{", 
              TemplateBox[<|"color" -> RGBColor[0.9, 0.36, 0.054]|>,
               "RGBColorSwatchTemplate"], "}"}], ",", 
             RowBox[{"{", "\"\<parametric\>\"", "}"}]}], "]"}]}], "]"}], ",", 
         RowBox[{"Legended", "[", 
          RowBox[{
           RowBox[{"QuantilePlot", "[", 
            RowBox[{"d2", ",", "dd2", ",", 
             RowBox[{"Frame", "->", "True"}], ",", 
             RowBox[{"ImageSize", "->", "550"}], ",", 
             RowBox[{"PlotRange", "->", "All"}], ",", 
             RowBox[{"PlotStyle", "\[Rule]", 
              RowBox[{"{", 
               
               TemplateBox[<|
                "color" -> RGBColor[0.365248, 0.427802, 0.758297]|>,
                "RGBColorSwatchTemplate"], "}"}]}], ",", 
             RowBox[{"FrameLabel", "->", 
              RowBox[{"{", 
               RowBox[{
               "\"\<distribution quantiles\>\"", ",", 
                "\"\<sample quantiles\>\""}], "}"}]}], ",", 
             RowBox[{
             "PlotLabel", "->", 
              "\"\<Q-Q plot for 2nd measurand in diseased\>\""}], ",", 
             RowBox[{"ReferenceLineStyle", "->", 
              RowBox[{"Directive", "[", 
               RowBox[{"Black", ",", "Thin", ",", 
                RowBox[{"Dashing", "[", 
                 RowBox[{"{", "}"}], "]"}]}], "]"}]}]}], "]"}], ",", 
           RowBox[{"PointLegend", "[", 
            RowBox[{
             RowBox[{"{", 
              TemplateBox[<|"color" -> RGBColor[0.365248, 0.427802, 0.758297]|>,
               "RGBColorSwatchTemplate"], "}"}], ",", 
             RowBox[{"{", "\"\<KDE\>\"", "}"}]}], "]"}]}], "]"}]}], "]"}]}], 
      "]"}], ",", "\[IndentingNewLine]", "2", ",", "\[IndentingNewLine]", 
     RowBox[{"Switch", "[", 
      RowBox[{
      "msr", ",", "\[IndentingNewLine]", "1", ",", "\[IndentingNewLine]", 
       RowBox[{"Show", "[", 
        RowBox[{
         RowBox[{"Legended", "[", 
          RowBox[{
           RowBox[{"QuantilePlot", "[", 
            RowBox[{"nd1", ",", 
             RowBox[{"pdist", "[", 
              RowBox[{"m12", ",", "s12", ",", "dist12"}], "]"}], ",", 
             RowBox[{"Frame", "->", "True"}], ",", 
             RowBox[{"ImageSize", "->", "550"}], ",", 
             RowBox[{"PlotRange", "->", "All"}], ",", 
             RowBox[{"PlotStyle", "\[Rule]", 
              RowBox[{"{", 
               TemplateBox[<|"color" -> RGBColor[0.9, 0.36, 0.054]|>,
                "RGBColorSwatchTemplate"], "}"}]}], ",", 
             RowBox[{"FrameLabel", "->", 
              RowBox[{"{", 
               RowBox[{
               "\"\<distribution quantiles\>\"", ",", 
                "\"\<sample quantiles\>\""}], "}"}]}], ",", 
             RowBox[{
             "PlotLabel", "->", 
              "\"\<Q-Q plot for 1st measurand in nondiseased\>\""}], ",", 
             RowBox[{"ReferenceLineStyle", "->", 
              RowBox[{"Directive", "[", 
               RowBox[{"Black", ",", "Thin", ",", 
                RowBox[{"Dashing", "[", 
                 RowBox[{"{", "}"}], "]"}]}], "]"}]}]}], "]"}], ",", 
           RowBox[{"PointLegend", "[", 
            RowBox[{
             RowBox[{"{", 
              TemplateBox[<|"color" -> RGBColor[0.9, 0.36, 0.054]|>,
               "RGBColorSwatchTemplate"], "}"}], ",", 
             RowBox[{"{", "\"\<parametric\>\"", "}"}]}], "]"}]}], "]"}], ",", 
         RowBox[{"Legended", "[", 
          RowBox[{
           RowBox[{"QuantilePlot", "[", 
            RowBox[{"nd1", ",", "dnd1", ",", 
             RowBox[{"Frame", "->", "True"}], ",", 
             RowBox[{"ImageSize", "->", "550"}], ",", 
             RowBox[{"PlotRange", "->", "All"}], ",", 
             RowBox[{"PlotStyle", "\[Rule]", 
              RowBox[{"{", 
               
               TemplateBox[<|
                "color" -> RGBColor[0.365248, 0.427802, 0.758297]|>,
                "RGBColorSwatchTemplate"], "}"}]}], ",", 
             RowBox[{"FrameLabel", "->", 
              RowBox[{"{", 
               RowBox[{
               "\"\<distribution quantiles\>\"", ",", 
                "\"\<sample quantiles\>\""}], "}"}]}], ",", 
             RowBox[{
             "PlotLabel", "->", 
              "\"\<Q-Q plot for 1st measurand in nondiseased\>\""}], ",", 
             RowBox[{"ReferenceLineStyle", "->", 
              RowBox[{"Directive", "[", 
               RowBox[{"Black", ",", "Thin", ",", 
                RowBox[{"Dashing", "[", 
                 RowBox[{"{", "}"}], "]"}]}], "]"}]}]}], "]"}], ",", 
           RowBox[{"PointLegend", "[", 
            RowBox[{
             RowBox[{"{", 
              TemplateBox[<|"color" -> RGBColor[0.365248, 0.427802, 0.758297]|>,
               "RGBColorSwatchTemplate"], "}"}], ",",
[truncated: 2,400,842 more chars]
